# Supplementary material
Source: PubMed Central journal article supplement (PMC8888331)
Supplement: mmc1.pdf [file mmc1.pdf]

# THE LANCET

## Respiratory Medicine

### Supplementary appendix

This appendix formed part of the original submission and has been peer reviewed. We post it as supplied by the authors.

Supplement to: Alemany A, Millat-Martinez P, Corbacho-Monné M, et al. High-titre methylene blue-treated convalescent plasma as an early treatment for outpatients with COVID-19: a randomised, placebo-controlled trial. *Lancet Respir Med* 2022; published online Feb 9. [https://doi.org/10.1016/S2213-2600\(22\)00050-9](https://doi.org/10.1016/S2213-2600(22)00050-9).

# Supplementary appendix to High-titre methylene blue-treated convalescent plasma as an early treatment for outpatients with COVID-19: a randomised, placebo-controlled trial

## Table of contents

|                                                                                                                                |    |
|--------------------------------------------------------------------------------------------------------------------------------|----|
| Table of contents .....                                                                                                        | 1  |
| CONV-ERT GROUP OF AUTHORS .....                                                                                                | 2  |
| ADDITIONAL METHODS.....                                                                                                        | 3  |
| Methods S1. Study sites and catchment population .....                                                                         | 3  |
| Methods S2. Convalescent plasma collection, testing, processing, storage, and distribution ..                                  | 3  |
| Methods S3. Convalescent plasma neutralizing activity .....                                                                    | 5  |
| Methods S4. Characterization of serologic status of enrolled participants at baseline .....                                    | 6  |
| Methods S5. Analysis of SARS-CoV-2 Viral Load by RT-PCR .....                                                                  | 6  |
| Methods S6. WHO Clinical progression scale score .....                                                                         | 7  |
| ADDITIONAL RESULTS .....                                                                                                       | 8  |
| Figure S1. Distribution of neutralizing antibody titres (ID50 and IU) against WH1 pseudovirus in plasma donors.....            | 8  |
| Figure S2. Distribution of neutralizing antibody titres (ID50) against WH1 and alpha-variant pseudovirus in plasma donors..... | 9  |
| Figure S3. Distribution of neutralizing antibody titres (ID50) pre-MB and post-MB .....                                        | 9  |
| Figure S4. Distribution of SARS-CoV-2 variants during donation and recruitment periods ....                                    | 10 |
| Table S1. Cross-neutralization of SARS-CoV-2 variants.....                                                                     | 11 |
| Table S2. Subjects per participating site .....                                                                                | 12 |
| Figure S5. Distribution of neutralizing antibody titres (ID50 and IU) in participants at day 7, according to trial group.....  | 13 |
| Table S3. Log-binomial regression model.....                                                                                   | 14 |
| Table S4. Clinical trial end points in the per protocol population .....                                                       | 15 |
| Figure S6. Time to resolution of COVID-19 symptoms.....                                                                        | 16 |
| Figure S7. Schoenfeld Test of the proportional hazard assumption and scatterplots of the risk over time .....                  | 17 |
| Figure S8. 10-point WHO Clinical progression scale score .....                                                                 | 18 |
| Table S5. Solicited Adverse Events.....                                                                                        | 19 |
| Appendix references.....                                                                                                       | 20 |
| PROTOCOL .....                                                                                                                 | 21 |

## CONV-ERT GROUP OF AUTHORS

- **Fight AIDS and Infectious Diseases Foundation**

Susana Ferrer, Mireia Gallardo, Maria Ubals, Camila González-Beiras, Martí Vall-Mayans, Clara Suñer, Claudia Laporte, Aroa Nieto, Xavier Comas-Leon, Zahida Jiménez, Ferran Ramírez-Viaplana

- **Hospital Universitari Germans Trias i Pujol (HUGTiP)**

Maria Delgado Capel, Beatriz Díez Sánchez, Maria Pons Barber, Cristian Gonzalez Ruiz, Laura Navarrete Gonzalez, David González García, Ainhoa Vivero Larraza, Victor Carceles Peiró, Clàudia Roquer López, Neus Robert, Carles Palet

- **Hospital Universitari de Bellvitge**

Carlota Gudiol, Pablo Casares Gonzalez, Gemma Arcos Vila, Begoña Flores Aguilera, Graciela Rodríguez-Sevilla, Macarena Dastis Arias

- **CUAP Manresa**

Judit Roca Font, Katherine M. Carrasco Matos, Glòria Saüch Valmaña, Carla Vidal Obradors

- **Hospital Comarcal de Sant Bernabé**

Silvia Tarres García, Margarida Curriu Sabatès, Raquel Nieto Rodríguez

- **Blood Bank Department - Banc de Sang i Teixits (BST)**

Rosa Línio, Miriam Fornos, Natàlia Casamitjana, Eva Alonso, Núria Martínez, Laura Analía Maglio, Laura Comellas Fernandez, Nadia Garcia, Luis Hernández, María Isabel González, Anna Bravo, Yolanda García, Silvia Sauleda Oliveras

- **Gerència Territorial Metropolitana Nord**

Tatiana Vertiz, Sergio Benavent, Andrea Sofia Bianco, Joaquim Verdaguer, Ney Nicanor Briones Zambrano, Maria Viozquez Meya

- **Metropolitana Nord Laboratory**

Águeda Hernández

- **Microbiology Service, Metropolitana Nord Laboratory**

Cristina Casaña Lopez, Antoni E. Bordoy, Victoria González Soler, Montserrat Giménez, Alexa París

- **IrsiCaixa AIDS Research Institute**

Silvia Marfil, Benjamin Trinité, Eulàlia Grau

## ADDITIONAL METHODS

### Methods S1. Study sites and catchment population

| Study sites                                 | Principal Investigator(s)                  | Health region          |
|---------------------------------------------|--------------------------------------------|------------------------|
| Hospital Universitari Germans Trias i Pujol | Oriol Mitjà                                | Àmbit Metropolità Nord |
| Hospital Universitari de Bellvitge          | Pierre Malchair                            | Àmbit Metropolità Sud  |
| CUAP Manresa                                | Anna Ruiz-Comellas<br>Anna Ramírez-Morros  | Catalunya Central      |
| Hospital Comarcal de Sant Bernabé           | Rosa Amado Simon<br>Joana Rodríguez Codina | Catalunya Central      |

### Methods S2. Convalescent plasma collection, testing, processing, storage, and distribution

#### Plasma collection and distribution

The study convalescent plasma was supplied by the regional blood and tissue bank (*Banc de Sang i Teixits de Catalunya* – BST). The BST is a public agency of the Catalan Department of Health whose mission is to guarantee the supply and proper use of human blood and tissue in Catalonia. The BST has a network of blood donation centres located at Catalonia's leading hospitals, and implements a system of whole blood process control, from the initial moment of donation to the final step, transfusion.

Convalescent plasma donors were recruited and screened, according to the standard donor selection guidelines in Spain, mostly by 5 out of 12 donation centres located in leading hospitals in Barcelona health region. Convalescent plasma was obtained via plasmapheresis from donors with a prior diagnosis of Covid-19 confirmed by a positive RT-PCR or a positive test for SARS-CoV-2 antigen. Plasma units had a volume between 235 and 315 ml (gross weight between 275 and 350 g), and from apheresis between 470 and 630 ml (gross weight between 535 and 695 g). All convalescent plasma units were inactivated with methylene blue and labelled following standard procedures.

Convalescent plasma was centralized and stored at regional blood and tissue bank facilities (*Banc de Sang i Teixits de Catalunya* – BST), and after being screened for high anti-SARS-CoV-2 IgG titres and selected for the COnV-ert study, was distributed to the four different study centres.

#### Characteristic of donors:

- Basic criteria:
  - o Man or woman with no pregnancy history (or who have been tested and found negative for anti-HLA antibodies using a validated assay).
  - o Age  $\geq$  18 years and  $<$ 65 years ( $<$ 70 years for regular donors)
  - o Weight  $\geq$  50 kg
  - o No history of previous transfusions
- Donor Informed Consent and Plasmapheresis Informed Consent
- Prior diagnosis of Covid-19 documented by a positive RT-PCR or a positive test for SARS-CoV-2 antigen, whether the individual had symptoms or not.
- A deferral period of at least 14 days after symptom resolution and at least 7 days after resolution of fever.
- Evaluation of laboratory tests:
  - o ABO/Rh(D) test; Irregular Antibody
  - o Test serologies: HBV, HCV, HIV, Syphilis, HTLV I and II, T. cruzi, T. pallidum, WestNile virus
  - o IgG, IgM, IgA antibodies anti-SARS-CoV-2

- Antibodies anti-HLA, anti-HNA, anti-HPA (for women without pregnancy or transfusion history)
- Maximum volume 616 g (600 ml)
- If donor >1 donation of convalescent plasma, cut-off  $\geq 3$  (Euroimmun techniques to measure anti-SARS-CoV-2 IgG), regardless of how long it has been since donor had the disease

#### Testing of donated plasma

The convalescent plasma was screened for high anti-SARS-CoV-2 IgG titres with a commercial CE-marked **ELISA** microplate coated with recombinant Spike S1 domain protein (Euroimmun Medizinische Labordiagnostika, Lübeck, Germany) by the regional blood bank (*Banc de Sang i Teixits de Catalunya – BST*) in a sample obtained from donated plasma after donation. The US FDA determined that convalescent plasma with a EUROIMMUN sample  $\geq 3.5$  qualifies as high titre <sup>1</sup>. Only plasmapheresis with a sample to cut-off ratio  $\geq 6$  on the EUROIMMUN IgG enzyme-linked immunosorbent assay (ELISA) targeting the spike glycoprotein were supplied for the COV-ert study. EUROIMMUN IgG has been shown to correlate well with neutralization assays, and a sample to cut-off ratio  $\geq 6$  was associated with neutralizing titres of  $\geq 1:100$  in convalescent plasma <sup>2,3</sup>.

A sample of each convalescent plasma unit was collected during preparation and masking of interventional product by unblinded BST staff in each participating centre and sent to a centralized laboratory (*IrsiCaixa laboratory*) for prospective characterization of neutralizing antibody titres. More than one participant could receive plasma from the same donor.

### Methods S3. Convalescent plasma neutralizing activity

**Pseudovirus generation and neutralization assay:** HIV reporter pseudoviruses expressing SARS-CoV-2 S protein and Luciferase were generated. pNL4-3.Luc.R-E- was obtained from the NIH AIDS Reagent Program <sup>4</sup> SARS-CoV-2.SctΔ19 was generated (GeneArt) from the full protein sequence of SARS-CoV-2 spike with a deletion of the last 19 amino acids in C-terminal, human-codon optimized and inserted into pcDNA3.4-TOPO <sup>5</sup>. Expi293F cells were transfected using ExpiFectamine293 Reagent (Thermo Fisher Scientific, USA) with pNL4-3.Luc.R-E- and SARS-CoV-2.SctΔ19 (Wuhan-Hu-1 or B.1.1.7), at an 8:1 ratio, respectively. Control pseudoviruses were obtained by replacing the S protein expression plasmid with a VSV-G protein expression plasmid as reported <sup>6</sup> Supernatants were harvested 48 hours after transfection, filtered at 0.45 μm, frozen, and titrated on HEK293T cells overexpressing WT human ACE-2 (Integral Molecular, USA). Briefly, neutralization assays were performed in duplicate in Nunc 96-well cell culture plates (Thermo Fisher Scientific), 200 TCID<sub>50</sub> of pseudovirus were preincubated with three-fold serial dilutions (1/60–1/14,580) of heat-inactivated plasma samples for 1 hour at 37°C. Then, 1x10<sup>4</sup> HEK293T/hACE2 cells treated with DEAE-Dextran (Sigma-Aldrich, USA) were added. Results were read after 48 hours using the EnSight Multimode Plate Reader and BriteLite Plus Luciferase reagent (PerkinElmer, USA). Neutralization capacity of the plasma samples was calculated by comparing the experimental Relative Light Units (RLU) calculated from infected cells treated with each plasma to the max RLUs (maximal infectivity calculated from untreated infected cells) and min RLUs (minimal infectivity calculated from uninfected cells) and expressed as percent neutralization: %Neutralization = (RLU<sub>max</sub>–RLU<sub>experimental</sub>)/(RLU<sub>max</sub>–RLU<sub>min</sub>)\*100. The ID<sub>50</sub> (reciprocal dilution inhibiting 50% of the infection) was calculated by plotting and fitting the log of plasma dilution vs. normalized response to a 4-parameters equation in Prism 9.0.2 (GraphPad Software, USA).

The neutralization assay has been previously validated in a large subset of samples with a replicative viral inhibition assay <sup>7</sup>. Furthermore, to facilitate conversion to International Units (IU), we tested in our assay a panel of plasma samples containing a dilution series of a high titre convalescent plasma calibrated in IU/mL using the standard 20/130 obtained from the National Institute for Biological Standards and Control (NIBSC, United Kingdom)<sup>8</sup>. Experimental neutralization titres can be converted to IU/mL using the following regression formula ( $IU/ml = 4160/(2^{(\text{experimentalID50}-13.962)/-0.9798})$ ) derived from assay calibration with the pre-quantified control as shown in Figure.

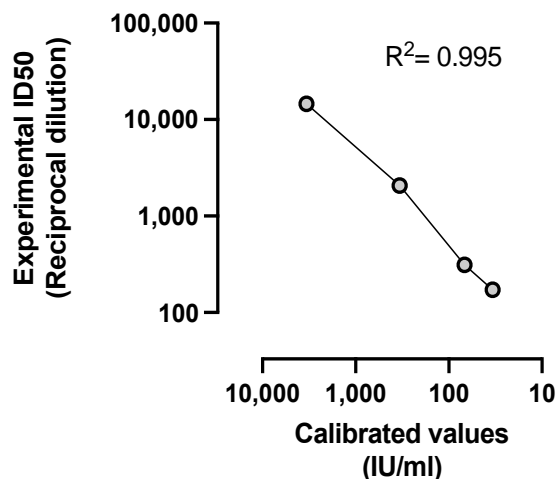

Figure. Correlation between experimental ID<sub>50</sub> values and calibrated neutralization titres.

#### Methods S4. Characterization of serologic status of enrolled participants at baseline

Blood samples from all enrolled participants were collected at baseline and sent for prospective characterization of SARS-CoV-2 antibodies at a central laboratory (Microbiology Service, *Metropolitana Nord Laboratory, Institut Català de la Salut, Badalona, Spain*). Serologic status was defined according to the results of the ELISA for detection of anti-SARS-CoV-2 IgM and IgG, considering seropositivity if the participant was IgG+/IgM-, IgG-/IgM+ or IgG+/IgM+.

We tested samples by Chemiluminescence immunoassay (CLIA) in a fully automated platform (LIAISON® XL). We used recombinant Trimeric Spike glycoprotein as antigen LIAISON® SARS-CoV-2 TrimericS IgG quantitative SARS-CoV-2 IgG (DiaSorin, Vercelli, Italy) and S1-RBD as antigen. LIAISON® SARS-CoV-2 IgM qualitative SARS-CoV-2 IgM (DiaSorin, Vercelli, Italy).

#### Methods S5. Analysis of SARS-CoV-2 Viral Load by RT-PCR

The detection of the SARS-CoV-2 virus was performed from nasopharyngeal swabs at a centralized laboratory (*Microbiology Department, Clinical Laboratory Metropolitana Nord, Badalona, Barcelona, Spain*). Three nasopharyngeal swabs were collected from each participant, at baseline, D7 and D28. RNA was extracted using the STARMag reagent (Seegene, Walnut Creek, Canada) on the Microlab Starlet IV (Hamilton Life Science Robotics) automatic extractor, according to the manufacturer's protocol. The presence of SARS-CoV-2 was confirmed by retrotranscription and real-time PCR in a single step with the Allplex 2019-nCoV assay (Werfen, Hospitalet de Llobregat, Spain) on the CFX96 instrument (BIO-RAD, Hercules, California, USA).

For absolute quantification, a standard curve was built using 1/2 serial dilutions of a SARS-CoV2 RNA (Amplirun® Coronavirus RNA Control, catalogue ref. MBC090, Vircell Microbiologists, Granada, Spain), run in parallel to a set of samples covering all thermal cycles used in the analysis. Negative samples were assigned to a Ct of 40. The viral load of each sample (in copies/mL) was extrapolated from the standard curve. The viral load was estimated from the corresponding Ct values (RdRP gene).

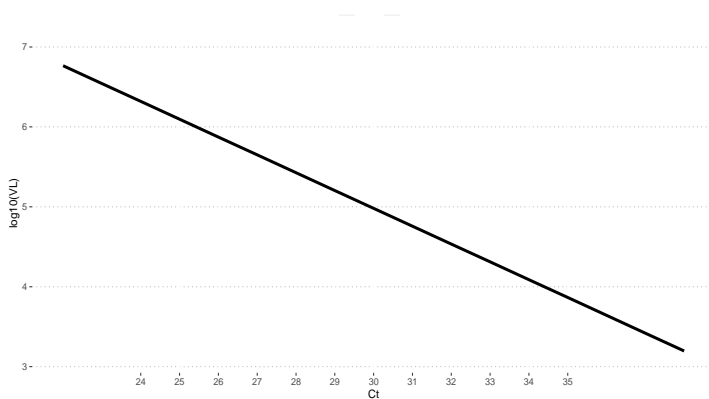

Figure. Standard curve

## Methods S6. WHO Clinical progression scale score

| Patient State                  | Descriptor                                                                             | Score |
|--------------------------------|----------------------------------------------------------------------------------------|-------|
| Uninfected                     | Uninfected; no viral RNA detected                                                      | 0     |
| Ambulatory mild disease        | Asymptomatic; viral RNA detected                                                       | 1     |
|                                | Symptomatic; independent                                                               | 2     |
|                                | Symptomatic; assistance needed                                                         | 3     |
| Hospitalized: moderate disease | Hospitalized; no oxygen therapy*                                                       | 4     |
|                                | Hospitalized; oxygen by mask or nasal prongs                                           | 5     |
| Hospitalized: severe diseases  | Hospitalized; oxygen by NIV or high flow                                               | 6     |
|                                | Intubation and mechanical ventilation, $pO_2/FiO_2 \geq 150$ or $SpO_2/FiO_2 \geq 200$ | 7     |
|                                | Mechanical ventilation $pO_2/FiO_2 < 150$ ( $SpO_2/FiO_2 < 200$ ) or vasopressors      | 8     |
|                                | Mechanical ventilation $pO_2/FiO_2 < 150$ and vasopressors, dialysis, or ECMO          | 9     |
| Death                          | Death                                                                                  | 10    |

Abbreviations. ECMO: extracorporeal membrane oxygenation; FiO<sub>2</sub>: fraction of inspired oxygen; NIV: non-invasive ventilation; pO<sub>2</sub>: partial pressure of oxygen; SpO<sub>2</sub>: oxygen saturation.



## ADDITIONAL RESULTS

Figure S1. Distribution of neutralizing antibody titres (ID50 and IU) against WH1 pseudovirus in plasma donors

A

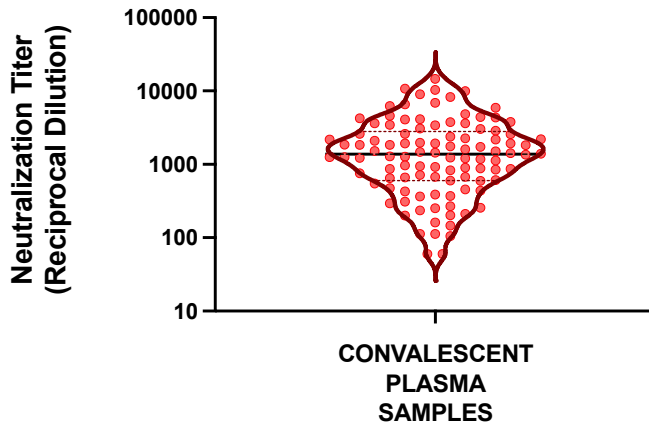

C

| Donors<br>(n=148)  | ID50<br>(Reciprocal dilution) |
|--------------------|-------------------------------|
| Minimum            | 60.00                         |
| 25% Percentile     | 602.3                         |
| <b>Median</b>      | <b>1379</b>                   |
| 75% Percentile     | 2801                          |
| Maximum            | 14580                         |
| Range              | 14520                         |
| Mean               | 2237                          |
| Std. Deviation     | 2602                          |
| Std. Error of Mean | 255.1                         |

B

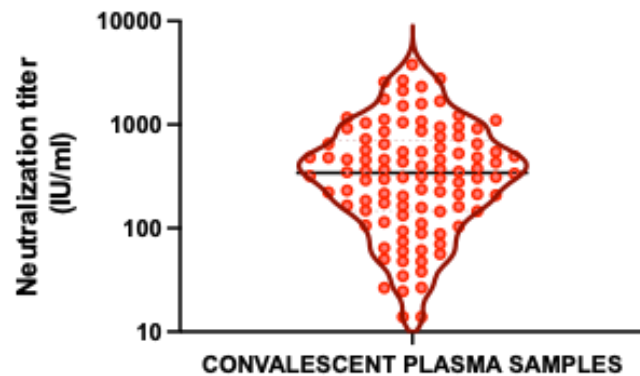

D

| Donors<br>(n=148)  | IU/ml<br>(International units) |
|--------------------|--------------------------------|
| Minimum            | 13.9                           |
| 25% Percentile     | 146.8                          |
| <b>Median</b>      | <b>341.7</b>                   |
| 75% Percentile     | 704.5                          |
| Maximum            | 3794                           |
| Range              | 3780                           |
| Mean               | 566.1                          |
| Std. Deviation     | 673.0                          |
| Std. Error of Mean | 68.99                          |

Panel A shows violin plot of titres (as reciprocal dilution) of transfused plasma samples with median (solid lines) and 25 and 75 percentiles (dotted lines).

Panel B shows violin plot of titres (international units) of transfused plasma samples with median (solid lines) and 25 and 75 percentiles (dotted lines).

The full statistical description is shown in panel C (reciprocal dilution) and panel D (international units).

**Figure S2. Distribution of neutralizing antibody titres (ID50) against WH1 and alpha-variant pseudovirus in plasma donors**

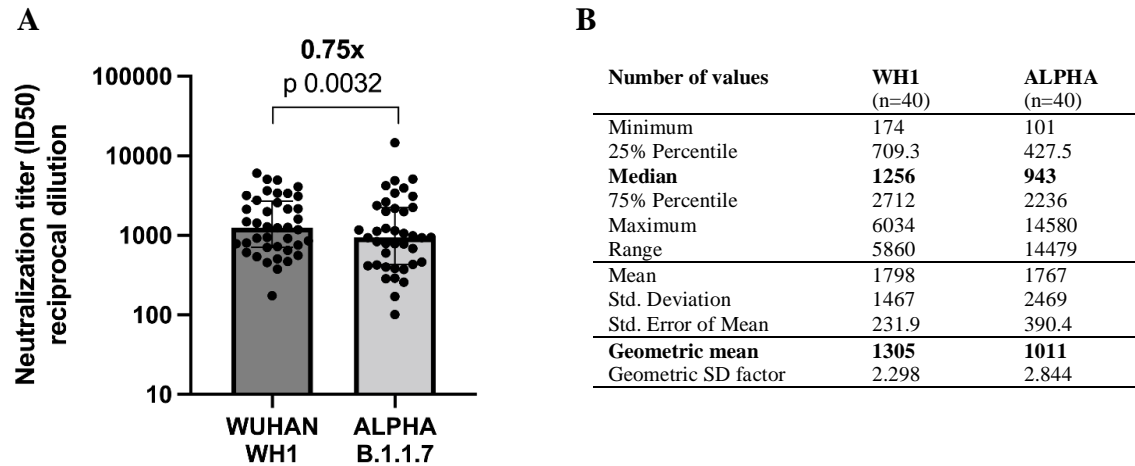

Panel A shows neutralizing antibody titres (as reciprocal dilution) of transfused plasma samples against Wuhan (WH1) and alpha-variant (B.1.1.7) pseudovirus. The full statistical description is shown in panel B.

Statistics: Paired Wilcoxon Test (N=40). Bars in Panel A represent 95% CI and median is represented with a thick horizontal line. Dots in Panel A are neutralization titres (reciprocal dilution) of all samples tested against Wuhan (WH1) and alpha variant (B.1.1.7).

**Figure S3. Distribution of neutralizing antibody titres (ID50) pre-MB and post-MB**

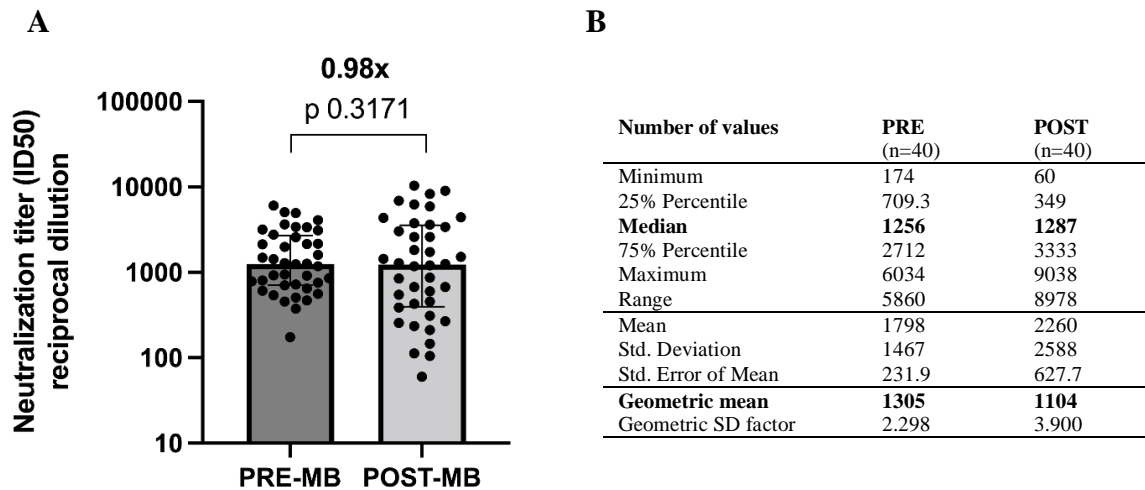

Panel A shows neutralizing antibody titres (as reciprocal dilution) of transfused plasma samples pre-methylene blue (MB) treatment and post-methylene blue (MB) treatment. The full statistical description is shown in panel B.

Statistics: Paired Wilcoxon Test (N=40). Bars in Panel A represent 95% CI and median is represented with a thick horizontal line. Dots in Panel A are neutralization titres (reciprocal dilution) of all samples tested pre-MB and post-MB treatment.

**Figure S4. Distribution of SARS-CoV-2 variants during donation and recruitment periods**

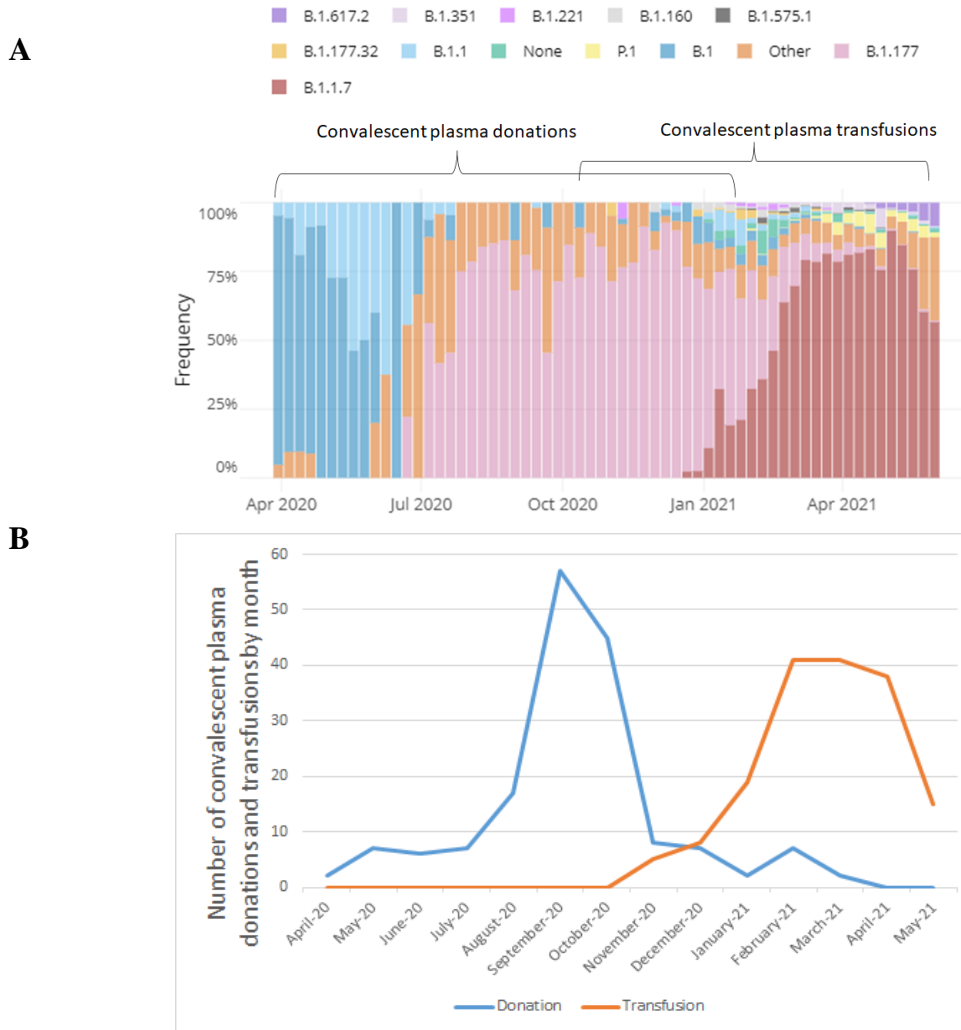

**Panel A.** Average weekly variants frequency in Catalunya during CONV-ert convalescent plasma donations period (Apr 2020 - Feb 2021) and recruitment period (Nov - Jun 2021); (source <http://covidtag.paseq.org/>). **Panel B.** Number of convalescent plasma donations and transfusions by month.

Convalescent plasma donations were collected between April 2020 and February 2021 when the predominant variants in Catalunya were B1 and B1.1 (Mar-May 2020), and B1.177 (Jun-Dec 2020). The Alpha VOC (B.1.1.7) was first reported in Catalunya in January 2021 and didn't become the main circulating strain until February 2021. Approximately 90% of the study participants were included between 1<sup>st</sup> January and 28<sup>th</sup> May 2021, during the rapid spread of the B.1.1.7 variant, and when the proportion of Delta VOC (B.1.617.2) cases was negligible (<5%). Gamma VOC (P.1) and Beta VOC (B.1.351) were reported in very low proportions during the whole recruitment period <sup>9</sup>.

Quantification of neutralizing activity of convalescent plasma was tested at IrsiCaixa laboratory, using a neutralization assay with pseudoviruses expressing the spike of the original SARS-CoV-2 isolate Wuhan-Hu-1 (WH1). The investigators had previously tested the neutralizing activity of sera from infected and vaccinated individuals against WH1, D614G mutant and the Alpha VOC (B.1.1.7 variant). Their results showed that neutralizing activity of plasma obtained from B1 and B1.1 convalescent patients was minimally reduced against the Alpha VOC (B.1.1.7 variant)<sup>5</sup>. The vast majority of lab studies have found no significant change in neutralizing activity of plasma from patients infected in the first wave against Alpha VOC (B.1.1.7), while there was a remarkable reduction in neutralizing activity against Gamma VOC (P.1), Beta VOC (B.1.351), and Delta VOC (B.1.617)<sup>10-16</sup>.

**Table S1. Cross-neutralization of SARS-CoV-2 variants**

|                                                |
|------------------------------------------------|
| No significant change in neutralizing activity |
| Fold change <3                                 |
| Fold change 3-10                               |
| Fold change 10-100                             |
| Fold change >100                               |

|                               |                                                             | <b>B.1.1.7 (Alpha variant) compared to original virus</b>                                                                                                                                  |
|-------------------------------|-------------------------------------------------------------|--------------------------------------------------------------------------------------------------------------------------------------------------------------------------------------------|
| <b>Nature</b> <sup>10</sup>   | <b>n 20</b><br>Authentic clinical viral isolates            | Fold change ID <sub>50</sub> (mean): 1.4 ( <b>p=0.522</b> ) relative to WA1 (wild-type virus)<br><b>Not statistically significant.</b>                                                     |
| <b>Nat Med</b> <sup>12</sup>  | <b>n 58</b><br>Authentic clinical viral isolates            | Mean ID <sub>50</sub> : 1.3 x10 <sup>3</sup> and 1 x10 <sup>3</sup> (10 <sup>2</sup> to 2 x10 <sup>4</sup> ) for B.1.1.7 and D614G, respectively.<br><b>Not statistically significant.</b> |
| <b>JAMA</b> <sup>13</sup>     | <b>n 20</b><br>Focus reduction neutralization tests (FRNTs) | FRNT <sub>50</sub> (GMTs) 168 for WA1 (95% CI, 113-249); 91 for B1 (95% CI, 60-138); 145 for B.1.1.7 (95% CI, 96-220).<br><b>Not statistically significant.</b>                            |
| <b>Cell Rep</b> <sup>11</sup> | <b>n 2</b><br>Pseudovirus neutralization assay              | Fold change ID <sub>50</sub> : -1 to -2.9 ( <b>p=0.15</b> ) relative to 614G.<br><b>Not statistically significant.</b>                                                                     |
| <b>Viruses</b> <sup>5</sup>   | <b>n 48</b><br>Pseudovirus neutralization assay             | Fold change ID <sub>50</sub> (median): 0.7 WH1/B.1.1.7<br><b>Not statistically significant.</b>                                                                                            |
| <b>J Infect</b> <sup>17</sup> | <b>n 90</b><br>Authentic clinical viral isolates            | Fold change ID <sub>50</sub> (mean): -1.6 ( <b>p=0.0002</b> ) relative to 20A.EU1 (lineage B.1)                                                                                            |
| <b>Cell</b> <sup>15</sup>     | <b>n 34</b><br>Focus reduction neutralization test (FRNT)   | Fold change FRNT <sub>50</sub> (GMTs): -2.9 ( <b>p&lt;0.0001</b> ) relative to Victoria (early Wuhan-related strain)                                                                       |

|                                        |                                                 | <b>B.1.1.7 (Alpha variant) compared to D614G</b>                                                                                             |
|----------------------------------------|-------------------------------------------------|----------------------------------------------------------------------------------------------------------------------------------------------|
| <b>Cell Host Microbe</b> <sup>14</sup> | <b>n 15</b><br>Pseudovirus neutralization assay | Fold change ID <sub>50</sub> (median): -1.5 (range 0.7 to 5.5; IQR -1.1 to -1.8) relative to D614G.<br><b>Not statistically significant.</b> |
| <b>Viruses</b> <sup>5</sup>            | <b>n 48</b><br>Pseudovirus neutralization assay | Fold change ID <sub>50</sub> (median): 1.17 ( <b>p&lt;0.0001</b> ) D614G/B.1.1.7                                                             |
| <b>Nature</b> <sup>18</sup>            | <b>n 27</b><br>Pseudovirus neutralization assay | Fold change ID <sub>50</sub> (mean): -4.5 ( <b>p=&lt;0.001</b> ) relative to D614G                                                           |

|                               |                                                                                            | <b>B.1.351 (Beta variant)</b>                                                                                                                                                                 |
|-------------------------------|--------------------------------------------------------------------------------------------|-----------------------------------------------------------------------------------------------------------------------------------------------------------------------------------------------|
| <b>Nature</b> <sup>10</sup>   | <b>n 20</b><br>A) Authentic clinical viral isolates<br>B) Pseudovirus neutralization assay | A) Fold change ID <sub>50</sub> (mean): -9.4 ( <b>p&lt;0.0001</b> ) relative to WA1 (wild-type virus)<br>B) Fold change ID <sub>50</sub> (mean): -22 ( <b>p&lt;0.0001</b> ) relative to D614G |
| <b>Cell Rep</b> <sup>11</sup> | <b>n 2</b><br>Pseudovirus neutralization assay                                             | Fold change ID <sub>50</sub> : -3 to -7.3 ( <b>p=0.0001</b> ) relative to D614G                                                                                                               |
| <b>Nat Med</b> <sup>12</sup>  | <b>n 58</b><br>Authentic clinical viral isolates                                           | Fold change ID <sub>50</sub> (mean): -5 to -10 ( <b>p=0.0012</b> ) relative to D614G                                                                                                          |

|                           |                                                 | <b>B.1.617.2 (Delta variant)</b>                                                                                     |
|---------------------------|-------------------------------------------------|----------------------------------------------------------------------------------------------------------------------|
| <b>Cell</b> <sup>19</sup> | <b>n 50</b><br>Pseudovirus neutralization assay | Fold change FRNT <sub>50</sub> (GMTs): -2.7 ( <b>p&lt;0.0001</b> ) relative to Victoria (early Wuhan-related strain) |

Abbreviations: n: number of convalescent patients; ID<sub>50</sub>: Reciprocal dilution of serum that neutralized 50% of the virus; FRNT<sub>50</sub>: Focus reduction neutralization test with reciprocal dilution of serum that neutralized 50% of the virus; GMTs: geometric mean titres

**Table S2. Subjects per participating site**

| <b>Study sites</b>                          | <b>Total<br/>(n=376)</b> | <b>Placebo<br/>(n=188)</b> | <b>Convalescent<br/>plasma<br/>(n=188)</b> | <b>Distance from plasma<br/>central blood bank</b> |
|---------------------------------------------|--------------------------|----------------------------|--------------------------------------------|----------------------------------------------------|
| Hospital Universitari Germans Trias i Pujol | 275 (73.1)               | 135 (71.8)                 | 140 (74.5)                                 | ≈11 km                                             |
| Hospital Universitari de Bellvitge          | 73 (19.4)                | 39 (20.7)                  | 34 (18.1)                                  | ≈12 km                                             |
| CUAP Manresa                                | 16 (4.3)                 | 7 (3.7)                    | 9 (4.8)                                    | ≈60 km                                             |
| Hospital Comarcal de Sant Bernabé           | 12 (3.2)                 | 7 (3.7)                    | 5 (2.7)                                    | ≈90 km                                             |

Figure S5. Distribution of neutralizing antibody titres (ID50 and IU) in participants at day 7, according to trial group

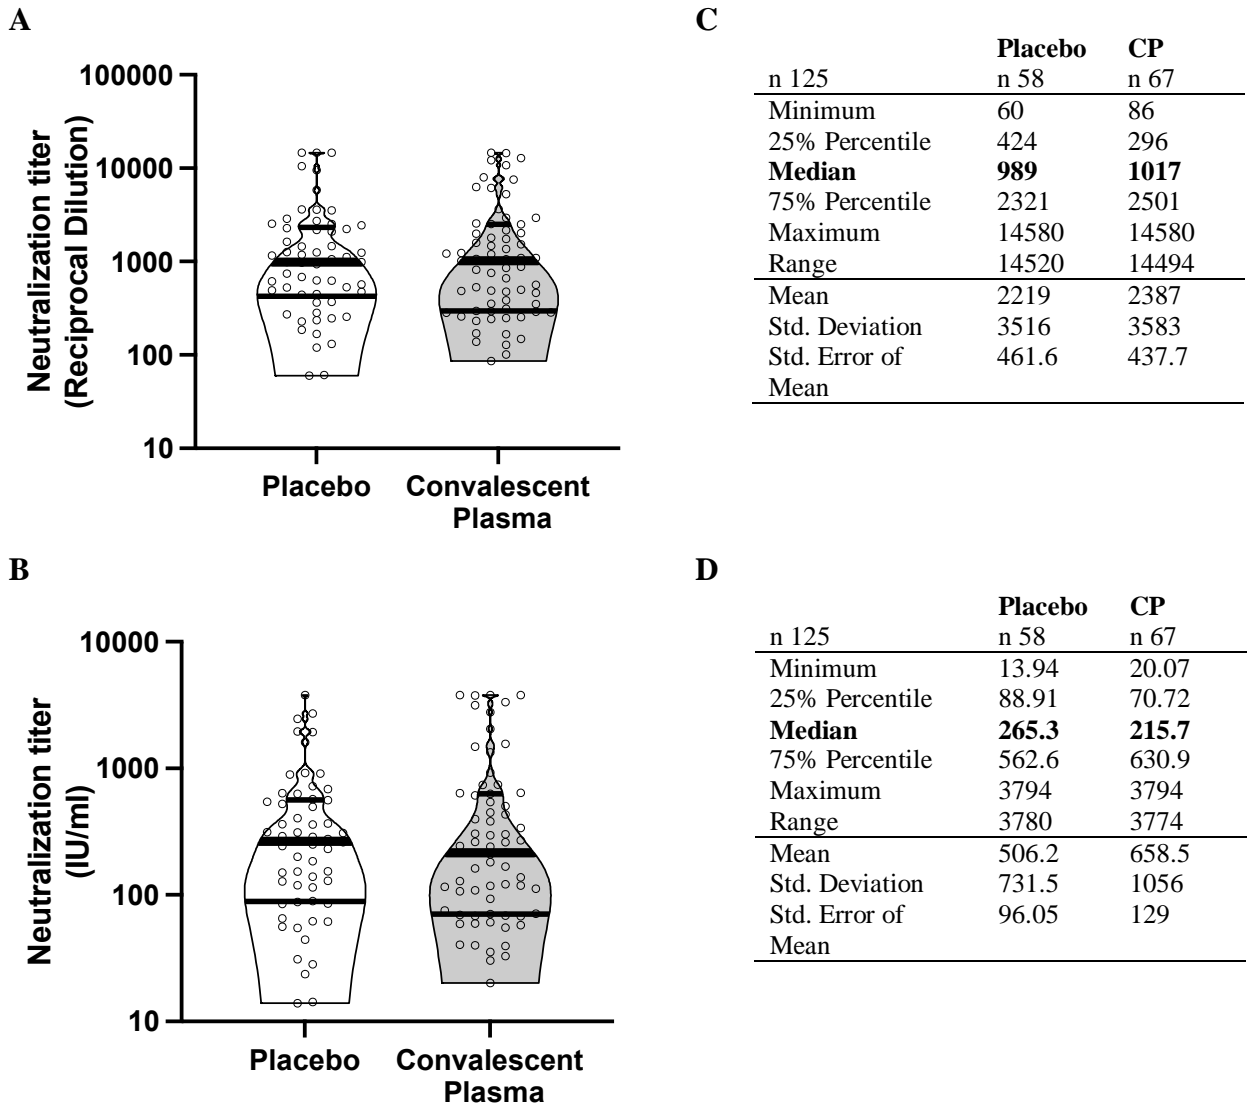

Panel A shows violin plot of neutralizing antibody titres (as reciprocal dilution) in the placebo and convalescent plasma groups at day 7 after infusion with median (thick line) and 25 and 75 percentiles (thin lines).

Panel B shows violin plot of neutralizing antibody titres (international units) in the placebo and convalescent plasma groups at day 7 after infusion with median (thick line) and 25 and 75 percentiles (thin lines).

The full statistical description is shown in panel C (reciprocal dilution) and panel D (international units).

**Table S3. Log-binomial regression model**

| Variables                                | Hospitalized        |                   | RR (CI 95%)             | p-value |
|------------------------------------------|---------------------|-------------------|-------------------------|---------|
|                                          | No                  | Yes               |                         |         |
| Placebo                                  | 167 (50.2%)         | 21 (48.8%)        | 1.048 (0.597 to 1.839)  | 0.87    |
| Convalescent Plasma                      | 166 (49.9%)         | 22 (51.2%)        |                         |         |
| Age                                      | 57.95 (7.9)         | 61.47 (8.0)       | 1.037 (1.009 to 1.065)  | 0.0103  |
| Male                                     | 181 (54.4%)         | 22 (51.2%)        | 1.12 (0.638 to 1.966)   | 0.69    |
| Female                                   | 152 (45.7%)         | 21 (48.8%)        |                         |         |
| BMI (mean, SD)                           | 27.49 (4.4)         | 29.84 (4.9)       | 1.092 (1.037 to 1.15)   | 0.0009  |
| <b>Comorbidities</b>                     |                     |                   |                         |         |
| Smoker                                   | 172 (51.7%)         | 19 (45.2%)        | 1.257 (0.709 to 2.228)  | 0.43    |
| Obesity                                  | 256 (76.9%)         | 24 (55.8%)        | 2.309 (1.325 to 4.024)  | 0.0031  |
| Cardiac disease                          | 314 (94.3%)         | 39 (90.7%)        | 1.574 (0.616 to 4.024)  | 0.34    |
| Lung disease                             | 305 (91.6%)         | 38 (88.4%)        | 1.368 (0.578 to 3.236)  | 0.48    |
| Neurological disease                     | 322 (96.7%)         | 41 (95.4%)        | 1.362 (0.369 to 5.033)  | 0.64    |
| Diabetes                                 | 298 (89.5%)         | 39 (90.7%)        | 0.886 (0.335 to 2.348)  | 0.81    |
| Chronic Renal Failure                    | 327 (98.2%)         | 43 (100%)         | 0 (0 to Inf)            | 0.99    |
| Liver Disease                            | 330 (99.1%)         | 43 (100%)         | 0 (0 to Inf)            | 0.99    |
| Past history of cancer                   | 319 (95.8%)         | 39 (92.9%)        | 1.62 (0.556 to 4.717)   | 0.38    |
| <b>Current episode</b>                   |                     |                   |                         |         |
| Mild Covid-19                            | 329 (98.8%)         | 37 (86.1%)        | 5.935 (3.286 to 10.719) | 0.0001  |
| WHO scale (mean, SD)                     | 2.01 (0.11)         | 2 (0)             | 0 (0 to Inf)            | 0.99    |
| <b>Antibody serum status at baseline</b> |                     |                   |                         |         |
| Negative                                 | 287 (88.1%)         | 39 (90.7%)        | 0.778 (0.292 to 2.069)  | 0.61    |
| Positive                                 | 39 (11.96%)         | 4 (9.3%)          |                         |         |
| <b>Laboratory results</b>                |                     |                   |                         |         |
| Lymphocytes (median, IQR)                | 1.26 (1-1.6)        | 0.90 (0.8-1.18)   | 0.204 (0.096 to 0.435)  | 0.0001  |
| Ferritin (median, IQR)                   | 215.9 (100.2-388.6) | 284.5 (184-431.7) | 1.001 (1 to 1.002)      | 0.0107  |
| Prealbumin (median, IQR)                 | 28.1 (22.1-40.1)    | 23.4 (16.1-58.5)  | 1 (0.996 to 1.003)      | 0.83    |
| D-dimer (median, IQR)                    | 334.5 (250-505.8)   | 422 (255-669.5)   | 1 (1 to 1)              | 0.85    |

**Table S4. Clinical trial end points in the per protocol population**

|                                                                             | N                 | Convalescent<br>plasma | Placebo      |                           |          |
|-----------------------------------------------------------------------------|-------------------|------------------------|--------------|---------------------------|----------|
| <b>Clinical primary end point:</b><br>hospitalization through day 28        |                   | n (%)                  | n (%)        | Relative Risk (95%CI)     | P-values |
| <b>Overall population</b>                                                   | Nc=182;<br>Np=185 | 21 (11.5)              | 21 (11.3)    | 1.02 (0.72 to 1.44)       | 0.93     |
| <b>Virologic primary endpoint:</b><br>change in viral load from<br>baseline |                   | Mean (SD)              | Mean (SD)    | Crude difference (95% CI) | P-values |
| <b>Overall population</b>                                                   |                   |                        |              |                           |          |
| Day 7                                                                       | Nc=174;<br>Np=172 | -2.40 (1.33)           | -2.32 (1.43) | -0.09 (-0.34 to 0.16)     | 0.48     |
| Day 28                                                                      | Nc=179;<br>Np=172 | -3.86 (1.56)           | -4.00 (1.45) | 0.12 (-0.17 to 0.40)      | 0.42     |



**Figure S6. Time to resolution of COVID-19 symptoms**

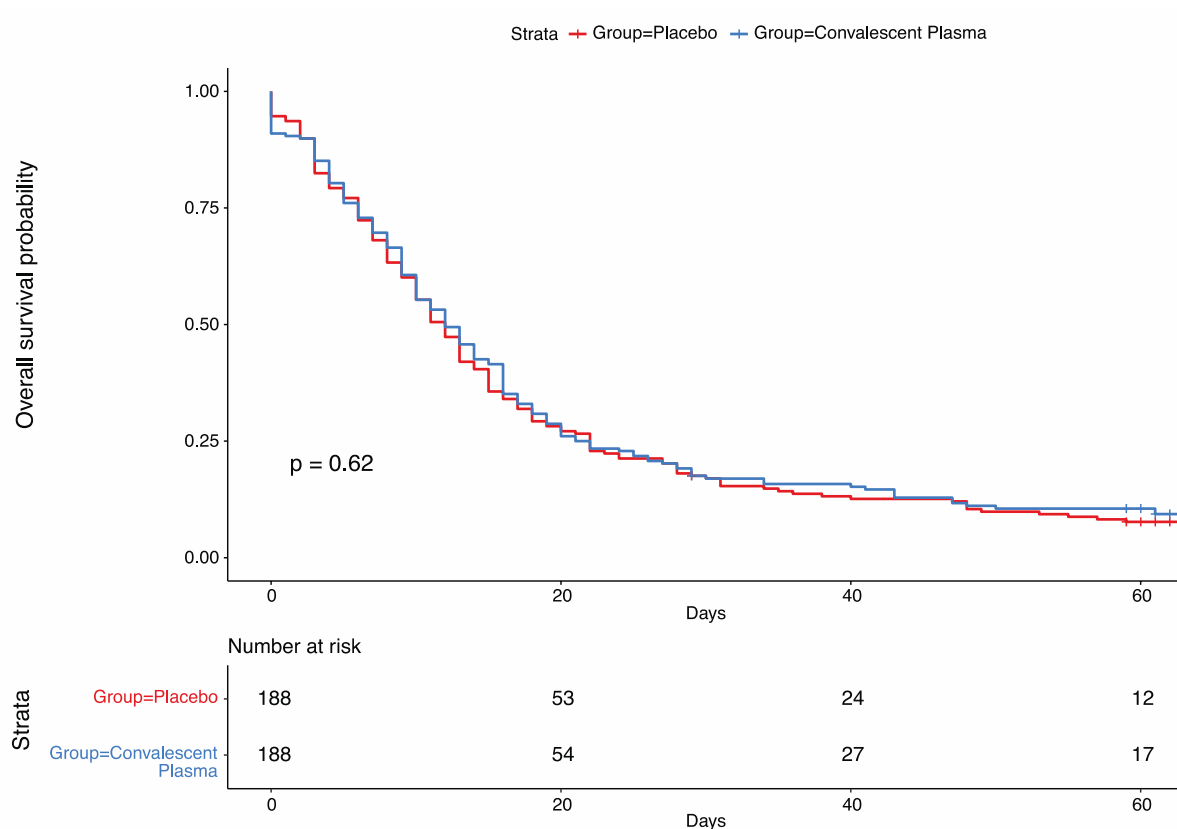

|                                          |                          | Placebo<br>(n=188)  | Convalescent Plasma<br>(n=188) | p-value |
|------------------------------------------|--------------------------|---------------------|--------------------------------|---------|
| <b>Days to resolution (median [IQR])</b> | <b>symptoms (median)</b> | 12.00 [6.00, 22.00] | 12.00 [6.00, 21.25]            | 0.76    |
| <b>status (%)</b>                        | <i>Censored data</i>     | 15 (8.0)            | 20 (10.6)                      | 0.48    |
|                                          | <i>Not Censored data</i> | 173 (92.0)          | 168 (89.4)                     |         |

Figure S7. Schoenfeld Test of the proportional hazard assumption and scatterplots of the risk over time

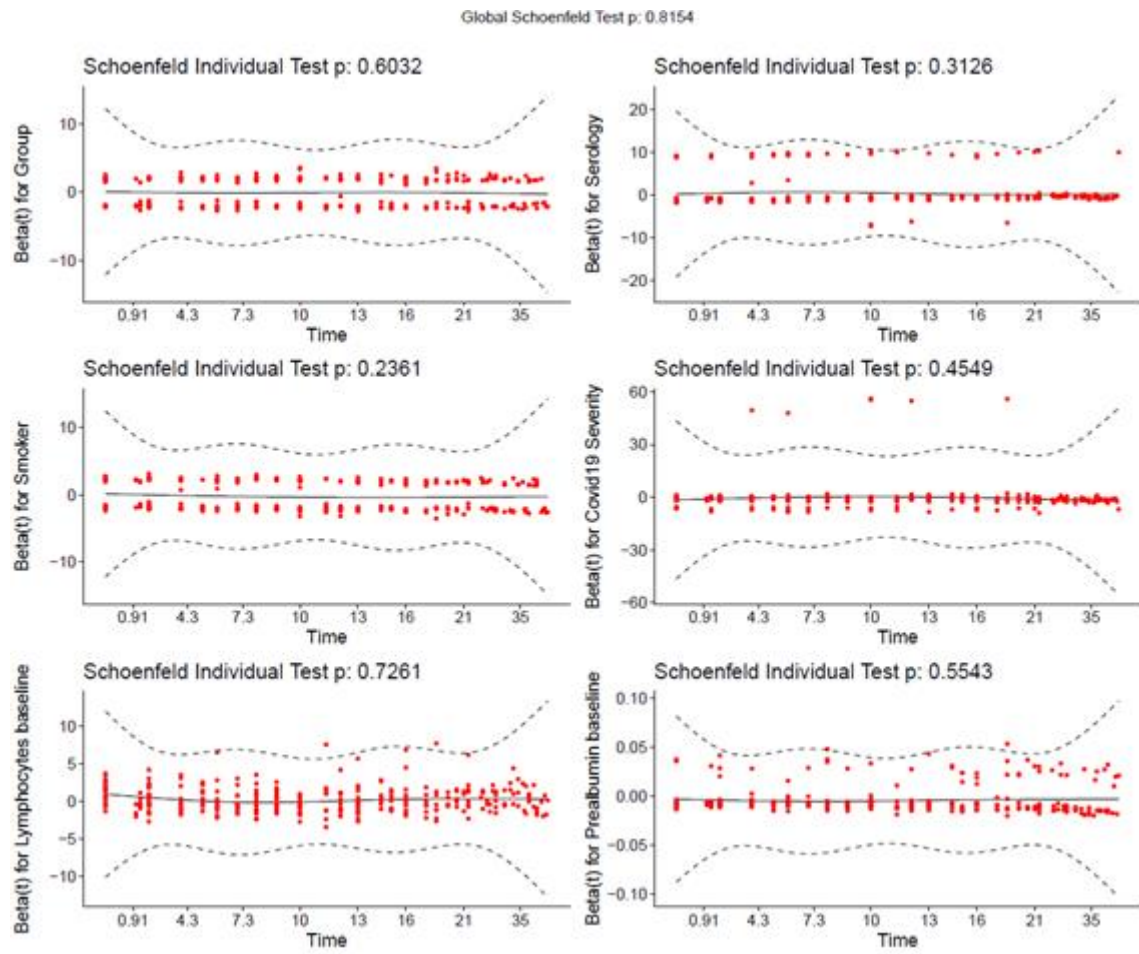

**Figure S8. 10-point WHO Clinical progression scale score**

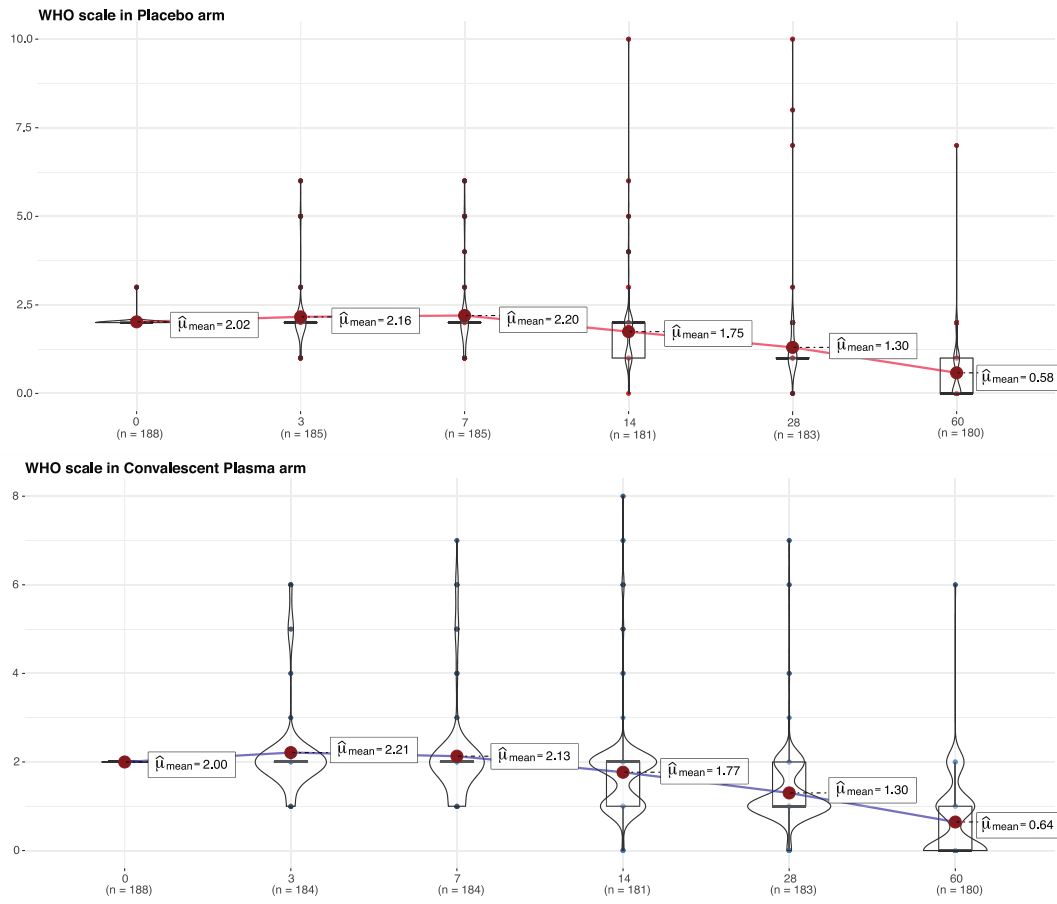

**Table S5. Solicited Adverse Events**

| <b>Treatment Related Adverse Events</b>           | <b>Total<br/>(n=376)</b> | <b>Placebo<br/>(n=188)</b> | <b>Convalescent plasma<br/>(n=188)</b> |
|---------------------------------------------------|--------------------------|----------------------------|----------------------------------------|
| Total (%)                                         | 32 (8.5)                 | 8 (4.2)                    | 24 (12.8)                              |
| Local reactions (%)                               | 5 (1.3)                  | 2 (1.1)                    | 3 (1.6)                                |
| Vasovagal syndrome (%)                            | 4 (1.1)                  | 3 (1.6)                    | 1 (0.5)                                |
| Fever or chills (%)                               | 7 (1.9)                  | 2 (1.1)                    | 5 (2.7)                                |
| Gastrointestinal symptoms (%)                     | 2 (0.5)                  | 1 (0.5)                    | 1 (0.5)                                |
| Mild allergic reactions (%)                       | 12 (3.1)                 | 0 (0)                      | 12 (6.4)                               |
| Severe allergic reactions or anaphylaxis (%)      | 0 (0)                    | 0 (0)                      | 0 (0)                                  |
| Thromboembolic events (%)                         | 1 (0.3)                  | 0 (0)                      | 1 (0.5) *                              |
| Volume overload (%)                               | 0 (0%)                   | 0 (0)                      | 0 (0)                                  |
| Acute haemolytic transfusion reaction (%)         | 0 (0%)                   | 0 (0)                      | 0 (0)                                  |
| Transfusion-related acute lung injury (TRALI) (%) | 0 (0%)                   | 0 (0)                      | 0 (0)                                  |
| Other (%)                                         | 1 (0.3)                  | 0 (0)                      | 1 (0.5)                                |

\*Severe Adverse Event

| <b>Severe Adverse Events<br/>(grade 3-4)</b> | <b>Total<br/>(n=376)</b> | <b>Placebo<br/>(n=188)</b> | <b>Convalescent plasma<br/>(n=188)</b> |
|----------------------------------------------|--------------------------|----------------------------|----------------------------------------|
| Total (%)                                    | 48 (12.8)                | 21 (11.2)                  | 27 (14.4)                              |
| Covid19 Related (%)                          | 46 (12.23)               | 21 (11.2)                  | 25 (12.7)                              |
| Related to IP infusion (%)                   | 1* (0.3)                 | 0 (0)                      | 1 (0.5)                                |

\*1 thromboembolic event in a participant without pneumonia, was considered as Severe Adverse Event (SAE) possibly related to investigational product and to COVID-19.

## Appendix references

- 1 Bratcher-Bowman N. Convalescent Plasma EUA Letter of Authorization March 9, 2021. 2021 <https://www.govinfo.gov/content/pkg/FR-2020-04-01/pdf/2020-06905.pdf>. (accessed June 3, 2021).
- 2 Valdivia A, Torres I, Latorre V, *et al.* Inference of SARS-CoV-2 spike-binding neutralizing antibody titers in sera from hospitalized COVID-19 patients by using commercial enzyme and chemiluminescent immunoassays. *Eur J Clin Microbiol Infect Dis* 2021 403 2021; **40**: 485–94.
- 3 Patel EU, Bloch EM, Clarke W, *et al.* Comparative performance of five commercially available serologic assays to detect antibodies to SARS-CoV-2 and identify individuals with high neutralizing titers. *J Clin Microbiol* 2021; **59**. DOI:10.1128/JCM.02257-20.
- 4 Connor RI, Chen BK, Choe S, Landau NR. Vpr Is Required for Efficient Replication of Human Immunodeficiency Virus Type-1 in Mononuclear Phagocytes. *Virology* 1995; **206**: 935–44.
- 5 Trinité B, Pradenas E, Marfil S, *et al.* Previous SARS-CoV-2 Infection Increases B.1.1.7 Cross-Neutralization by Vaccinated Individuals. *Viruses* 2021; **13**: 1135.
- 6 Sánchez-Palomino S, Massanella M, Carrillo J, *et al.* A cell-to-cell HIV transfer assay identifies humoral responses with broad neutralization activity. *Vaccine* 2011; **29**: 5250–9.
- 7 Trinité B, Tarrés-Fraixas F, Rodon J, *et al.* SARS-CoV-2 infection elicits a rapid neutralizing antibody response that correlates with disease severity. *Sci Rep* 2021; **11**: 2608.
- 8 Nguyen D, Simmonds P, Steenhuis M, *et al.* SARS-CoV-2 neutralising antibody testing in Europe: towards harmonisation of neutralising antibody titres for better use of convalescent plasma and comparability of trial data. *Eurosurveillance* 2021; **26**. DOI:10.2807/1560-7917.ES.2021.26.27.2100568.
- 9 CovidTag. <http://covidtag.paseq.org/> (accessed Oct 6, 2021).
- 10 Wang P, Nair MS, Liu L, *et al.* Antibody resistance of SARS-CoV-2 variants B.1.351 and B.1.1.7. *Nat* 2021 5937857 2021; **593**: 130–5.
- 11 Kaku Y, Kuwata T, Zahid HM, *et al.* Resistance of SARS-CoV-2 variants to neutralization by antibodies induced in convalescent patients with COVID-19. *Cell Rep* 2021; **36**: 109385.
- 12 Planas D, Bruel T, Grzelak L, *et al.* Sensitivity of infectious SARS-CoV-2 B.1.1.7 and B.1.351 variants to neutralizing antibodies. *Nat Med* 2021 275 2021; **27**: 917–24.
- 13 Edara VV, Hudson WH, Xie X, Ahmed R, Suthar MS. Neutralizing Antibodies Against SARS-CoV-2 Variants After Infection and Vaccination. *JAMA* 2021; **325**: 1896–8.
- 14 Shen X, Tang H, McDanal C, *et al.* SARS-CoV-2 variant B.1.1.7 is susceptible to neutralizing antibodies elicited by ancestral spike vaccines. *Cell Host Microbe* 2021; **29**: 529-539.e3.
- 15 Supasa P, Zhou D, Dejnirattisai W, *et al.* Reduced neutralization of SARS-CoV-2 B.1.1.7 variant by convalescent and vaccine sera. *Cell* 2021; **184**: 2201-2211.e7.
- 16 Wang P, Casner RG, Nair MS, *et al.* Increased Resistance of SARS-CoV-2 Variant P.1 to Antibody Neutralization. *bioRxiv* 2021; : 2021.03.01.433466.
- 17 Gidari A, Sabbatini S, Bastianelli S, *et al.* Cross-neutralization of SARS-CoV-2 B.1.1.7 and P.1 variants in vaccinated, convalescent and P.1 infected. *J Infect* 2021; **83**: 467–72.
- 18 Collier DA, De Marco A, Ferreira IATM, *et al.* Sensitivity of SARS-CoV-2 B.1.1.7 to mRNA vaccine-elicited antibodies. *Nat* 2021 5937857 2021; **593**: 136–41.
- 19 Liu C, Ginn HM, Dejnirattisai W, *et al.* Reduced neutralization of SARS-CoV-2 B.1.617 by vaccine and convalescent serum. *Cell* 2021; **184**: 4220-4236.e13.

## PROTOCOL

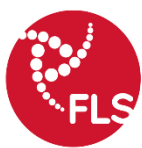

FUNDACIÓ **LLUITA** CONTRA LA SIDA  
I LES MALALTIES INFECCIOSES

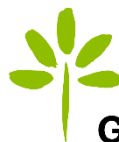

**Germans Trias i Pujol**  
Hospital

## **Convalescent Methylene Blue Treated (MBT) Plasma for Early Treatment in Non-hospitalised Mild or Moderate COVID-19 Patients: a Randomized Double Blind Study (CONV-ert)**

**Version 6.0, 7<sup>th</sup> March 2021**

### **Sponsors:**

*Fundació FLS de Lluita contra la Sida, les Malalties Infeccioses  
i la Promoció de la Salut i La Ciència*  
Hospital Universitari Germans Trias i Pujol  
Carretera de Canyet s/n  
08916 Badalona (Barcelona)

*Hospital Germans Trias i Pujol, Institut Català de la Salut*  
Carretera de Canyet s/n  
08916 Badalona (Barcelona)

### **Coordinating Investigator:**

Oriol Mitjà, MD, PhD  
Hospital Universitari Germans Trias i Pujol

The information contained in this document is confidential and must not be revealed to third persons without prior authorization as contemplated by Law.

This study will be conducted under the conditions described in this protocol and in compliance with the International Council for Harmonisation of Technical Requirements for Pharmaceuticals for Human Use (ICH) Good Clinical Practice (GCP) and all applicable regulatory requirements.

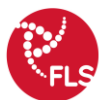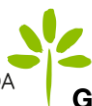

## **SIGNATURES**

The Coordinating Investigator and the Sponsors of the study:

“Convalescent Methylene Blue Treated (MBT) Plasma for Early Treatment in Non-hospitalised mild or moderate COVID-19 Patients: a Randomized Double Blind Study (COnV-ert)”

Declare that this study will be conducted in compliance with the protocol, Good Clinical Practices (GCP) published by the International Conference of Harmonization Guideline (ICH), and the applicable regulatory requirements.

Modifications to this protocol must be submitted prior agreement of the Principal Investigator and Sponsor.

**Coordinating Investigator:** Oriol Mitjà, MD, PhD

Signature and Date:

---

**Sponsor:** Bonaventura Clotet, MD, PhD

President of the Fundació FLS de Lluita contra la Sida, les Malalties Infeccioses i la Promoció de la Salut i La Ciència

Signature and Date:

---

**Sponsor:** Jordi Ara, MD, PhD

Managing Director of the Àrea Metropolitana Nord, Hospital Germans Trias i Pujol, Institut Català de la Salut

Signature and Date:

---





## 1 **GENERAL INFORMATION**

### 1.1 **Title**

Convalescent Methylene Blue Treated (MBT) Plasma for Early Treatment in Non-hospitalised Mild or Moderate COVID-19 Patients: a Randomized Double Blind Study (COnV-ert)

### 1.2 **Code**

COnV-ert

### 1.3 **Protocol Version and Date**

Version 6.0, 7<sup>th</sup> March 2021

Any modification of the protocol must also bear the amendment number and date.

### 1.4 **Sponsors**

This study will be sponsored by two different institutions:

- Fundació FLS de Lluita contra la Sida, les Malalties Infeccioses i la Promoció de la Salut i La Ciència  
Hospital Universitari Germans Trias i Pujol  
Carretera de Canyet s/n  
08916 Badalona (Barcelona)  
  
Person authorized by the sponsor to sign the protocol and amendments: Bonaventura Clotet, President
- Hospital Germans Trias i Pujol, Institut Català de la Salut  
Carretera de Canyet s/n  
08916 Badalona (Barcelona)  
  
Person authorized by the sponsor to sign the protocol and amendments: Jordi Ara, Managing Director

### 1.5 **Coordinating Investigator**

Oriol Mitjà, MD, PhD  
Fundació FLS de Lluita contra la Sida, les Malalties Infeccioses i la Promoció de la Salut i La Ciència  
Hospital Universitari Germans Trias i Pujol  
Carretera de Canyet s/n  
08916 Badalona (Barcelona)  
[omitja@flsida.org](mailto:omitja@flsida.org)

### 1.6 **Clinical Research Organization**

The study monitoring, regulatory submission to EC and other study tasks will be performed by the following Clinical Research Organization (CRO):

FLS-Research Support



Fundació FLS de Lluita contra la Sida, les Malalties Infeccioses i la Promoció de la Salut i La Ciència

Hospital Universitari Germans Trias i Pujol

Carretera de Canyet s/n

08916 Badalona

Phone +34 93 497 84 14

[info@fls-rs.com](mailto:info@fls-rs.com)

## 1.7 Sites and Investigators

This is a multiple site study. The list of investigators and participating sites may be found in **ANNEX 8**.

## 1.8 Technical Services and Institutions Involved

Blood inflammatory markers tests will be assessed at the central laboratories of Hospital Universitari Germans Trias i Pujol, Hospital Universitari de Bellvitge, Hospital Moisès Broggi de Sant Joan Despí, Hospital Sant Bernabé de Berga and Hospital Sant Joan de Déu de Manresa.

ABO compatibility test will be assessed at the Banc de Sang i Teixits (BST) or Hematology Department or Laboratory in each of the sites involved, depending on each center's transfusion protocols.

Quantitative measurement of SARS-CoV-2 viral load will be assessed at the Clinical genetics Service of the Hospital Universitari Germans Trias i Pujol (principal investigator: Ignasi Blanco).

Quantitative measurement of neutralizing antibodies against SARS-CoV-2 in convalescent MBT plasma and in participant's plasma will be assessed at the IrsiCaixa laboratory located in Hospital Universitari Germans Trias i Pujol, by the "Cell virology and immunology" group (principal investigator: Julià Blanco).

Inclusion/baseline hospital visits will be organized in partnership with the "Hospital at home care unit" (*Hospitalització domiciliària*).

Electronic case report form (eCRF), data management and statistics will be performed by BioClever 2005 S.L.U., (contact person: Mireia Bonet, T. 93 408 63 88).

Information regarding additional key personnel and organizations involved in the conduct of the study, including names and contact details of participating investigators, monitors, clinical laboratories, technical departments and/or institutions, as well as information on members of additional study committees, will be found in the study files of the sponsor and at the investigator sites.

Investigators and study staff will receive training in appropriate individual site training session(s).

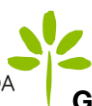

## 1. TABLE OF CONTENTS

|          |                                                                                              |           |
|----------|----------------------------------------------------------------------------------------------|-----------|
| <b>1</b> | <b>GENERAL INFORMATION</b>                                                                   | <b>3</b>  |
| 1.1      | TITLE                                                                                        | 3         |
| 1.2      | CODE                                                                                         | 3         |
| 1.3      | PROTOCOL VERSION AND DATE                                                                    | 3         |
| 1.4      | SPONSORS                                                                                     | 3         |
| 1.5      | COORDINATING INVESTIGATOR                                                                    | 3         |
| 1.6      | CLINICAL RESEARCH ORGANIZATION                                                               | 3         |
| 1.7      | SITES AND INVESTIGATORS                                                                      | 4         |
| 1.8      | TECHNICAL SERVICES AND INSTITUTIONS INVOLVED                                                 | 4         |
| <b>1</b> | <b>TABLE OF CONTENTS</b>                                                                     | <b>5</b>  |
| <b>2</b> | <b>STUDY SUMMARY</b>                                                                         | <b>9</b>  |
| <b>3</b> | <b>ABBREVIATIONS</b>                                                                         | <b>16</b> |
| <b>2</b> | <b>BACKGROUND INFORMATION</b>                                                                | <b>18</b> |
| 2.1      | CONVALESCENT PLASMA                                                                          | 18        |
| 2.1.1    | The use of Convalescent Plasma as treatment in infectious diseases                           | 18        |
| 2.1.2    | Name and Description of the Investigational Plasma                                           | 18        |
| 2.1.3    | Relevant Findings from Nonclinical and Clinical Trials                                       | 18        |
| 2.1.4    | Safety                                                                                       | 19        |
| 2.1.5    | Justification for the Route of Administration, Dosage, Dosage Regimen, and Treatment Periods | 19        |
| 2.2      | MONITORING EFFICACY OF TREATMENT                                                             | 20        |
| 2.2.1    | Virologic Outcomes                                                                           | 20        |
| 2.2.2    | Clinical Outcomes                                                                            | 20        |
| 2.2.3    | Inflammatory Markers                                                                         | 21        |
| 2.2.4    | Quantification of Neutralizing Antibodies Against SARS-Cov-2                                 | 22        |
| 2.2.5    | Sample Collection Method                                                                     | 22        |
| 2.3      | HYPOTHESES                                                                                   | 23        |
| <b>3</b> | <b>STUDY OBJECTIVES</b>                                                                      | <b>25</b> |
| 3.1      | PRIMARY OBJECTIVES                                                                           | 25        |
| 3.2      | SECONDARY OBJECTIVES                                                                         | 25        |
| <b>4</b> | <b>TRIAL DESIGN</b>                                                                          | <b>26</b> |
| 4.1      | TYPE OF TRIAL                                                                                | 26        |
| 4.2      | DESCRIPTION OF THE DESIGN                                                                    | 26        |

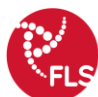

|          |                                                                      |           |
|----------|----------------------------------------------------------------------|-----------|
| 4.3      | <i>STUDY ENDPOINTS</i>                                               | 28        |
| 4.3.1    | Primary endpoint(s)                                                  | 28        |
| 4.3.2    | Secondary endpoints                                                  | 28        |
| 4.4      | <i>MEASURES TO AVOID BIAS</i>                                        | 28        |
| 4.4.1    | Randomization                                                        | 28        |
| 4.4.2    | Stratification                                                       | 29        |
| 4.4.3    | Blinding                                                             | 29        |
| 4.4.4    | Unblinding                                                           | 29        |
| 4.4.5    | Identification of Subjects                                           | 29        |
| 4.5      | <i>END OF STUDY</i>                                                  | 29        |
| 4.6      | <i>SOURCE DATA</i>                                                   | 30        |
| <b>5</b> | <b>STUDY INVESTIGATIONAL PRODUCTS</b>                                | <b>31</b> |
| 5.1      | <i>EXPERIMENTAL AND CONTROL INVESTIGATIONAL PRODUCTS</i>             | 31        |
| 5.2      | <i>ARM DESCRIPTION</i>                                               | 31        |
| 5.3      | <i>SUPPLY, PACKAGING, LABELLING AND STORAGE</i>                      | 31        |
| 5.3.1    | Supply                                                               | 31        |
| 5.3.2    | Packaging and Labelling                                              | 31        |
| 5.4      | <i>DOSE, INTERVAL, ROUTE AND METHOD OF ADMINISTRATION</i>            | 32        |
| 5.4.1    | Dose, Interval, and Route                                            | 32        |
| 5.4.2    | Administration and Timing of Investigational Plasma for Each Subject | 32        |
| 5.5      | <i>MODIFICATION OF THE TREATMENT REGIMEN</i>                         | 32        |
| 5.6      | <i>PRIOR AND CONCOMITANT TREATMENTS</i>                              | 32        |
| 5.7      | <i>ACCOUNTABILITY PROCEDURES FOR INVESTIGATIONAL PRODUCT</i>         | 32        |
| 5.8      | <i>TREATMENT COMPLIANCE</i>                                          | 33        |
| <b>6</b> | <b>SELECTION AND WITHDRAWAL OF SUBJECTS</b>                          | <b>34</b> |
| 6.1      | <i>STUDY POPULATION</i>                                              | 34        |
| 6.2      | <i>INCLUSION CRITERIA</i>                                            | 34        |
| 6.3      | <i>EXCLUSION CRITERIA</i>                                            | 34        |
| 6.4      | <i>SUBJECT WITHDRAWAL CRITERIA</i>                                   | 35        |
| 6.4.1    | Early Subject Withdrawal                                             | 35        |
| 6.4.2    | Medical Approach to Withdrawal                                       | 35        |
| 6.4.3    | Follow-up after Early Withdrawal                                     | 35        |
| 6.4.4    | Replacement of Participants                                          | 35        |
| 6.4.5    | Pre-randomization Loses                                              | 35        |

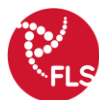

|          |                                                              |           |
|----------|--------------------------------------------------------------|-----------|
| <b>7</b> | <b>STUDY CONDUCT AND ASSESSMENT OF RESPONSE</b>              | <b>36</b> |
| 7.1      | <i>STUDY VISITS AND PROCEDURES</i>                           | 36        |
| 7.1.1    | Recruitment procedures                                       | 36        |
| 7.1.2    | Screening                                                    | 36        |
| 7.1.3    | Inclusion/baseline                                           | 36        |
| 7.1.4    | Day 3                                                        | 38        |
| 7.1.5    | Day 7                                                        | 38        |
| 7.1.6    | Day 14                                                       | 38        |
| 7.1.7    | Day 28                                                       | 39        |
| 7.1.8    | Day 60 (End-of-Study)                                        | 39        |
| 7.1.9    | Extra home visit (unscheduled visit)                         | 39        |
| 7.1.10   | Participant's Diary                                          | 39        |
| 7.2      | <i>CLINICAL PROGRESSION SCALES</i>                           | 39        |
| 7.2.1    | WHO Clinical Progression Scale                               | 39        |
| 7.2.2    | FLU-PRO® PLUS Questionnaire                                  | 40        |
| 7.2.3    | Assessment of Safety                                         | 40        |
| 7.3      | <i>DESCRIPTION OF LABORATORY TESTS AND PROCEDURES</i>        | 41        |
| 7.4      | <i>STUDY VARIABLES</i>                                       | 42        |
| 7.5      | <i>SCHEDULE OF PROCEDURES</i>                                | 45        |
| <b>8</b> | <b>ADVERSE EVENTS AND INCIDENTS</b>                          | <b>46</b> |
| 8.1      | <i>SAFETY PARAMETERS</i>                                     | 46        |
| 8.2      | <i>DEFINITIONS</i>                                           | 46        |
| 8.3      | <i>ADVERSE EVENTS ASSESSMENT</i>                             | 47        |
| 8.3.1    | Seriousness                                                  | 47        |
| 8.3.2    | Intensity                                                    | 47        |
| 8.3.3    | Causality                                                    | 47        |
| 8.3.4    | Expectedness                                                 | 48        |
| 8.3.5    | Duration                                                     | 48        |
| 8.3.6    | Action Taken                                                 | 48        |
| 8.3.7    | Outcome                                                      | 48        |
| 8.4      | <i>TIME FRAME FOR RECORDING ADVERSE EVENTS AND INCIDENTS</i> | 49        |
| 8.5      | <i>DOCUMENTATION RELATED TO ADVERSE EVENTS AND INCIDENTS</i> | 49        |
| 8.6      | <i>PREGNANCY</i>                                             | 49        |
| 8.7      | <i>PROCEDURE FOR ADVERSE EVENT REPORTING</i>                 | 49        |

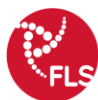

|           |                                                            |           |
|-----------|------------------------------------------------------------|-----------|
| 8.7.1     | Investigator                                               | 49        |
| 8.7.2     | Sponsor                                                    | 50        |
| 8.8       | <i>DATA AND SAFETY MONITORING BOARD</i>                    | 50        |
| <b>9</b>  | <b>STATISTICAL ANALYSIS</b>                                | <b>51</b> |
| 9.1       | <i>METHODS</i>                                             | 51        |
| 9.1.1     | Descriptive Analysis                                       | 51        |
| 9.1.2     | Bivariate Analysis                                         | 51        |
| 9.1.3     | Multivariate Analysis                                      | 51        |
| 9.2       | <i>ANALYSIS POPULATION</i>                                 | 51        |
| 9.3       | <i>SAMPLE SIZE</i>                                         | 52        |
| 9.4       | <i>INTERIM ANALYSES</i>                                    | 52        |
| 9.5       | <i>DEVIATION OF STATISTICAL PLAN</i>                       | 52        |
| <b>10</b> | <b>DIRECT ACCESS TO SOURCE DATA/DOCUMENTS</b>              | <b>53</b> |
| <b>11</b> | <b>QUALITY CONTROL AND QUALITY ASSURANCE</b>               | <b>54</b> |
| 11.1      | <i>STUDY MONITORING</i>                                    | 54        |
| 11.2      | <i>PROTOCOL DEVIATIONS</i>                                 | 54        |
| 11.3      | <i>AUDITS AND INSPECTIONS</i>                              | 54        |
| 11.4      | <i>DATA COLLECTION (ELECTRONIC CASE REPORT FORM, ECRF)</i> | 55        |
| 11.5      | <i>DATA MANAGEMENT</i>                                     | 55        |
| <b>12</b> | <b>ETHICS</b>                                              | <b>57</b> |
| 12.1      | <i>GENERAL CONSIDERATIONS</i>                              | 57        |
| 12.2      | <i>PARTICIPANT INFORMATION SHEET AND INFORMED CONSENT</i>  | 57        |
| <b>13</b> | <b>DATA HANDLING AND RECORD KEEPING</b>                    | <b>58</b> |
| 13.1      | <i>DATA HANDLING</i>                                       | 58        |
| 13.2      | <i>RECORD KEEPING</i>                                      | 58        |
| 13.2.1    | Investigator File and Document Retention                   | 58        |
| 13.2.2    | Source Documents and Basic Data                            | 58        |
| <b>14</b> | <b>FINANCING AND INSURANCE</b>                             | <b>59</b> |
| 14.1      | <i>SOURCE OF FINANCING</i>                                 | 59        |
| 14.2      | <i>INSURANCE POLICY</i>                                    | 59        |
| <b>15</b> | <b>PUBLICATION POLICY</b>                                  | <b>60</b> |
| <b>16</b> | <b>REFERENCES</b>                                          | <b>61</b> |
| <b>17</b> | <b>ANNEXES</b>                                             | <b>63</b> |

## 2. STUDY SUMMARY

**Title of Study:** Convalescent Methylene Blue Treated (MBT) Plasma for Early Treatment in Non-hospitalised Mild or Moderate COVID-19 Patients: a Randomized Double Blind Study (COnV-ert)

**Study code:** COnV-ert

### **Study Objectives:**

#### Primary Objectives

1. Assess the therapeutic potential of early administration of convalescent MBT plasma in reducing the rate of hospitalization at day 28 in non-hospitalised mild or moderate COVID-19 patients.
2. Assess the therapeutic potential of early administration of convalescent MBT plasma in reducing SARS-CoV-2 viral load at day 7, measured by quantitative RT-PCR (RT-qPCR) in non-hospitalised mild or moderate COVID-19 patients.

#### Secondary Objectives

1. Assess the therapeutic potential of early administration of convalescent MBT plasma in reducing WHO Clinical progression scale score in non-hospitalised mild or moderate COVID-19 patients.
2. Assess the therapeutic potential of early administration of convalescent MBT plasma in reducing the severity of common COVID-19 symptoms, measured with the FLU-PRO<sup>®</sup> PLUS scale, in non-hospitalised mild or moderate COVID-19 patients.
3. Assess the therapeutic potential of early administration of convalescent MBT plasma in reducing the duration of symptoms in non-hospitalised mild or moderate COVID-19 patients.
4. Assess the therapeutic potential of early administration of convalescent MBT plasma in reducing the mortality at day 60 in non-hospitalised mild or moderate COVID-19 patients.
5. Evaluate the safety and tolerability of convalescent MBT plasma in non-hospitalised mild or moderate COVID-19 patients.
6. Assess the change from baseline to day 7 of ferritin, prealbumin, interleukin 6 (IL-6), D-dimer, C reactive protein (CRP), and leukocytes and lymphocytes counts in peripheral blood in non-hospitalised mild or moderate COVID-19 patients receiving convalescent MBT plasma. Additional novel prognosis biomarkers might be quantified in subsequent studies.
7. Assess the impact of infused plasma on neutralizing activity by quantifying the change from baseline to day 7 in neutralizing antibodies against SARS-CoV-2 in peripheral blood in non-hospitalised mild or moderate COVID-19 patients receiving convalescent MBT plasma. Type, magnitude, specificity, quality and breadth of the antibody response will be characterized in subsequent studies.
8. Assess the long-term impact of plasma infusion on humoral immune responses, by quantifying the change from baseline to day 60 in neutralizing antibodies against SARS-CoV-2 in peripheral blood in non-hospitalised mild or moderate COVID-19 patients receiving convalescent MBT plasma. Type, magnitude, specificity, quality and breadth of the antibody response will be characterized in subsequent studies.

9. Compare agreement and SARS-CoV-2 viral load in self-collected middle turbinate (MT) swab and self-collected saliva samples with nasopharyngeal swab samples collected by a healthcare worker.
10. Assess the therapeutic potential of early administration of convalescent MBT plasma in reducing SARS-CoV-2 viral load at day 28, measured by quantitative RT-PCR (RT-qPCR) in non-hospitalised mild or moderate COVID-19 patients.

**Overall Study Design and Description:**

This is a prospective, randomized (1:1), double blind study of Convalescent anti-SARS-CoV-2 MBT Plasma (also known as convalescent plasma) plus standard medical treatment (SMT) versus placebo plus SMT in mild or moderate COVID-19 patients who are non-hospitalised. Subjects with confirmed infection by SARS-CoV-2 will receive SMT plus a total of 200- 300 mL of convalescent plasma that has been pathogen-inactivated using MBT or placebo.

Study candidates will voluntarily express their interest in participating in the study through the study website or will be offered to participate at the emergency (ER) and out-patient departments (OPD) of the participating hospitals. Candidates registered on the website will be contacted by study physicians by phone to inform them about the study and check their suitability for the study. Suitable candidates will be scheduled an inclusion/baseline visit in which informed consent will be obtained (i.e., the informed consent will be signed), and their eligibility will be confirmed. Candidates identified through ER and OPD departments will undergo an inclusion/baseline visit, where the informed consent will be obtained and eligibility will be checked. A subgroup of eligible candidates from selected study sites will be offered participation in the substudy to assess the immune response and the methods of sampling.

Blood and nasopharyngeal samples will be obtained from all eligible candidates.

Eligible candidates will be randomized and administered an intravenous (IV) infusion at baseline (convalescent plasma or placebo). Both the investigator and the participant will be blinded to the study treatment.

Specifically, subjects randomized to combination convalescent anti-SARS-CoV-2 MBT plasma plus SMT will undergo an ABO compatibility test and will receive a single infusion of 200 to 300 ml of ABO-compatible convalescent plasma. Subjects randomized to placebo plus SMT will receive a single infusion of 200 to 300 ml of sterile saline solution 0.9%. Infusion will be administered at baseline, using standard procedures for administration of fresh frozen plasma. Small adults weighing less than 45 kg will receive one infusion of 5 ml of convalescent plasma or placebo per kilogram of body weight.

Participants will be trained on the completion of symptoms diary card and safety diary card.

The participants of the substudy will be drawn an extra tube of blood sample and will be trained on self-collection of middle turbinate (MT) swabs and saliva, and self-collected samples will be obtained.

The symptoms and safety diary card will be filled by the participants daily from baseline to day 14. On follow-up visits on days 3, 7, 14, and 28, all participants will be assessed for clinical and safety outcomes. These visits will be all by telephone except for the day 7 and day 28 visits that will be at home or at hospital, where additional blood samples (only on day 7) and nasopharyngeal swabs will be collected.



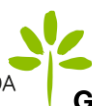

At day 60 visit, all participants will be assessed by telephone for health-status outcome.

For the participants of the substudy, on day 7, an extra tube of blood sample will be obtained and they will be asked to self-collect MT swabs and saliva. And on day 60, an extra tube of blood sample will be obtained during an additional home or hospital visit.

**Number of Subjects Planned:**

Approximately 474 individuals will be randomized (1:1) with an interim analysis after the first 60 subjects (30 in each arm).

The sample size will be re-assessed upon interim analysis.

Approximately 135 individuals from selected study sites will be included in the substudy to assess the immune response and the methods of sampling.

**Diagnosis and Main Criteria for Eligibility:**

Individuals with a SARS-CoV-2 confirmed infection from different regions of Catalonia.

Inclusion Criteria:

1. Adult male or female individuals of  $\geq 50$  years old.
2. In women of childbearing potential<sup>1</sup>, negative pregnancy test at inclusion/baseline.
3. Has confirmed SARS-CoV-2 infection as determined by PCR or validated antigen rapid diagnostic test<sup>2</sup> from nasopharyngeal swabs  $\leq 5$  days prior to inclusion/baseline visit.
4. Symptomatic with mild or moderate COVID-19 with symptoms onset date  $\leq 7$  days prior to inclusion/baseline visit.
  - a. Mild COVID-19: Individuals who have any of the common signs and/or symptoms of COVID-19 (i.e., fever, cough, sore throat, malaise, headache, muscle pain) without shortness of breath, dyspnoea, or abnormal chest imaging.
  - b. Moderate COVID-19: Individuals who have evidence of lower respiratory disease by clinical assessment or imaging and a saturation of oxygen ( $SpO_2$ )  $\geq 94\%$  on room air at sea level.
5. Willing to comply with the requirements of the protocol and available for follow-up for the planned duration of the study.
6. Has understood the information provided and capable of giving informed consent.

<sup>1</sup>A woman will be considered of childbearing potential if not permanently sterilized nor postmenopausal. Permanent sterilization methods include tubal ligation, hysterectomy and bilateral oophorectomy. Postmenopausal is defined as 12 months with no menses without an alternative medical cause.

<sup>2</sup>Panbio™ COVID-19 Ag Rapid Test (Abbott), STANDARD™ Q COVID-19 Ag Test (Roche) or any other CE marketed test for SARS-CoV-2 Ag detection.

**Diagnosis and Main Criteria for Eligibility:**

Exclusion Criteria:

1. If female, pregnant, breastfeeding, or planning a pregnancy during the study.
2. Severe or critical COVID-19:

- a. Severe COVID-19: respiratory frequency >30 breaths per minute, SpO<sub>2</sub> <94% on room air at sea level, ratio of arterial partial pressure of oxygen to fraction of inspired oxygen (PaO<sub>2</sub>/FiO<sub>2</sub>) <300 mmHg, or lung infiltrates >50%.
  - b. Critical COVID-19: respiratory failure, septic shock, and/or multiple organ dysfunction.
3. Current hospital admission for any cause.
  4. History of previous confirmed SARS-CoV-2 infection.
  5. History of significantly abnormal liver function (Child Pugh C).
  6. History of chronic kidney disease (CKD) ≥ stage 4, or need of dialysis treatment.
  7. Any pre-existing condition that increases risk of thrombosis.
  8. History of allergic reactions to blood or plasma products or methylene blue.
  9. Known IgA deficiency with anti-IgA antibodies.
  10. Medical conditions for which 200-300 ml of intravenous fluid is considered dangerous (i.e., decompensated heart failure or renal failure with fluid overload).
  11. Inability to consent and/or comply with study requirements, in the opinion of the investigator.
  12. Currently participating or planning to participate in any interventional study for the treatment of COVID-19 or SARS-CoV-2 infection until day 60.
  13. Previous vaccination with any COVID-19 vaccine.

**Investigational Product, Dose and Mode of Administration:**

Randomized participants will receive one intravenous (IV) infusion at baseline (convalescent plasma or placebo) and will continue their SMT for COVID-19 disease, as prescribed by regular physicians.

- Experimental arm: Subjects randomized to convalescent anti-SARS-CoV-2 MBT plasma plus SMT will receive one infusion of 200 to 300 ml of ABO-compatible convalescent plasma obtained from a convalescent donor.
- Placebo arm: Subjects randomized to placebo plus SMT will receive one infusion of 200 to 300 ml of sterile saline solution 0.9%.

**Duration of Treatment:**

The investigational product will be administered by IV infusion at baseline.

Participants will continue their standard medical treatment (SMT) for SARS-CoV-2 infection as prescribed by their regular physician. If applicable, SMT may be modified during the study, depending on personal requirements, the severity and progression of the disease, and need for hospitalization.

Subjects' participation (from inclusion/baseline visit to the end-of-study visit) will be up to 60 days.

**Endpoints and Timepoints of Assessment:**

Primary Endpoints and Timepoints of Assessment:

1. Hospitalization rate (i.e., who reach a score ≥4 in the WHO scale for clinical progression) [Time Frame: Up to 28 days after reception of investigational product]

Reduction of SARS-CoV-2 viral load in nasopharyngeal swabs at day 7 after start of treatment, as determined by RT-qPCR. [Time Frame: Up to 7 days after reception of investigational product]

**Secondary Endpoints and Timepoints of Assessment:**

1. Change in COVID-19 WHO Clinical progression scale score [Time Frame: Up to 60 days after reception of investigational product]
2. Change in COVID-19 symptoms severity score, assessed with the COVID-19 daily self-score tool (FLU-PRO<sup>®</sup> PLUS instrument) [Time Frame: Up to 14 days after reception of investigational product]
3. Time to complete resolution of symptoms [Time Frame: Up to 28 days after reception of investigational product]
4. Death rate [Time Frame: Up to 60 days after reception of investigational product]
5. Proportion of patients with adverse events (AE) and proportion of grade  $\geq 4$  AE, based on the *FDA Toxicity Grading Scale for Healthy Adult and Adolescent Volunteers scale* [Time Frame: Up to 28 days after reception of investigational product]
6. Change in inflammatory prognostic markers (ferritin, prealbumin, interleukin 6 (IL-6), D-dimer, C reactive protein (CRP) and leukocyte and lymphocyte counts) [Time Frame: Baseline and day 7 after reception of investigational product]
7. Intergroup comparison of absolute neutralization titers against SARS-CoV-2 in plasma of a subgroup of participants [Time Frame: Baseline and day 7 after reception of investigational product]
8. Change in titers of neutralizing antibodies against SARS-CoV-2 in plasma of a subgroup of participants [Time Frame: Baseline and day 60 after reception of investigational product]
9. Agreement and SARS-CoV-2 viral load of self-collected middle turbinate (MT) swab and saliva samples compared to nasopharyngeal swabs collected by a healthcare worker on a subgroup of participants [Time Frame: Baseline and day 7 after reception of the investigational product]
10. Reduction of SARS-CoV-2 viral load in nasopharyngeal swabs at day 28 after start of treatment, as determined by RT-qPCR. [Time Frame: Up to 28 days after reception of investigational product].

**Study Assessments and Procedures:**

COVID-19 patients of  $\geq 50$  years (1) will voluntarily express their interest in participating in the study through the study website or (2) will be informed of the study at the emergency (ER) or out-patient departments (OPD) from the participating sites.

1. Candidates who register on the study website will sign an authorization for the study investigators (physicians) to access their shared medical records (*Història Clínica Compartida de Catalunya HC3*). Study physicians will call the candidates who register on the website to perform a remote screening visit, where candidates will be informed about the study over the phone, and their suitability for the study will be checked. Suitable candidates will be scheduled a inclusion/baseline visit .
2. Candidates identified at the participating sites will be invited to participate by study physicians on-site, and those interested will undergo an inclusion/baseline visit.

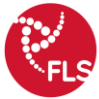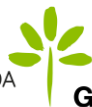

In the inclusion/baseline visit, either at the hospital or at home by the Hospital at Home care unit (*Hospitalització domiciliària*), candidates will be informed in person of study details and the informed consent will be obtained (i.e., subjects will sign the informed consent form). A physical examination will be performed, and women of childbearing potential will undergo a urine pregnancy test. Eligibility will be confirmed on this visit.

Blood samples will be obtained from all eligible candidates. Participants who meet all the inclusion and none of the exclusion criteria will be randomized. Evaluation of ABO compatibility using standard guidelines for compatibility procedures in blood transfusion laboratories will be performed in participants assigned to experimental (convalescent plasma) group.

Nasopharyngeal samples will be obtained from all participants. The participants of the substudy will be drawn an extra tube of blood sample and will be trained on self-collection of middle turbinate (MT) swabs and saliva, and self-collected samples will be obtained.

Participants will be also trained on completion of symptoms and safety diary card, which will be filled daily by the participant until the day 14 visit, through an electronic Case Report Form (eCRF). Paper forms will be available for those participants who are unable to submit data using the eCRF, in this scenario data will be collected at follow-up visits. Should any participant report any new symptom with grade 4 at the FLU-PRO<sup>®</sup> PLUS questionnaire, he or she will be contacted by telephone by the study staff to evaluate any possible AE and the need of an extra home visit. Participants will be also given a contact number to report AEs, to seek medical advice, and resolve any question related to the study.

All randomized participants will be administered an IV infusion at baseline (convalescent plasma or placebo). If an AE develops during infusion, the infusion will be slowed or stopped as per investigator's decision. Infusion will be halted if any manifestations of anaphylaxis develop, and it will not be restarted. Medicines for transfusion reactions (e.g. paracetamol, dexchlorpheniramine) may be given as a treatment.

On day 3, participants will be contacted by telephone by study staff for safety and clinical follow-up.

On day 7, participants will be visited by study staff, either at home or at the hospital, a blood sample will be drawn, and a nasopharyngeal swab will be collected by study staff. The participants of the substudy will be drawn an extra tube of blood sample and will self-collect middle turbinate (MT) swabs and saliva.

On day 14, participants will be contacted by telephone by study staff for safety and clinical follow-up.

On day 28, participants will be visited at hospital by study staff for safety and clinical follow-up, and a nasopharyngeal swab will be collected.

On day 60, participants will be contacted by telephone by study staff to evaluate health status. The participants of the substudy will be scheduled for a hospital or home visit to obtain a blood sample.

If the participant is unreachable at phone follow-up visits, clinical progression, as well as possible AEs will be assessed through medical record (*Història Clínica Compartida, HC3*), in order to assess all the study outcomes.

### Study samples

Nasopharyngeal swab samples for quantitative measurement of SARS-CoV-2 viral load by RT-qPCR will be obtained prior to infusion at baseline, on day 7 and on day 28.

MT swab and saliva self-collected samples for quantitative measurement of SARS-CoV-2 viral load by RT-qPCR will be obtained prior to infusion at baseline and at day 7 in the participants of the substudy.

Blood samples will be collected prior to infusion at baseline and at day 7 for all participants. Inflammatory prognostic markers (ferritin, prealbumin, interleukin 6 (IL-6), D-dimer, C reactive protein (CRP), and leukocytes and lymphocytes counts) will be assessed. Leftovers of plasma will be stored for future investigations.

In the participants of the substudy, an extra tube will be collected at baseline and day 7, and an extra blood draw will be performed at day 60 to assess neutralizing antibodies against SARS-CoV-2. Leftovers of plasma will be stored for future investigations.

Results of the sample analyses are not necessary for participants to remain in the study, and participants will only be informed of relevant results for their health.

Samples of the infused convalescent anti-SARS-CoV-2 MBT plasma will be obtained before infusion for quantitative measurement of neutralizing antibodies against SARS-CoV-2.

### **Statistical Method:**

Descriptive statistics will include the number of non-missing observation, mean, standard deviation (SD), median, minimum, and maximum values for the continuous/quantitative data or absolute and relative frequency counts and percentages for categorical/qualitative data. All analyses will be done with the R statistical package, version 6.3 or higher under a significance level of 0.05.

Populations: The primary efficacy analysis will be performed on the intention-to-treat (ITT) population, which will include all randomized participants. If deemed necessary, sensitivity analyses will be performed with the per-protocol (PP) population. Safety will be assessed in the safety population, which will include all participants who receive the investigational product (convalescent plasma or placebo).

### Determination of Sample Size:

A sample size of 237 cases per arm would provide the trial with 80% power to detect 50% reduction in hospitalization rate at day 28 after starting the treatment, assuming an expected rate of hospitalization of 15%, allowing a 5% of loss to follow-up.

Approximately 150 cases per arm are required to have 80% power to detect a difference of  $0.5 \log_{10}$  in the mean reduction of SARS-CoV-2 viral load at a two-sided significance level of  $\alpha = 0.05$ , assuming an expected overall standard deviation of 1.5. A  $0.5 \log_{10}$  copies/mL difference in reduction was chosen to represent the minimal threshold for a biologically relevant change for our analyses.

An interim analysis of efficacy and safety variables will be performed after the first 60 subjects achieve the primary endpoint (i.e., day 28) for the purpose of sample size recalculation. The interim analyses will be performed using blinded data, unless otherwise indicated by the DSMB.

### 3. ABBREVIATIONS

|                                    |                                                                    |
|------------------------------------|--------------------------------------------------------------------|
| ACE2                               | angiotensin converting enzyme 2                                    |
| ADL                                | Activities daily life                                              |
| AE                                 | Adverse event                                                      |
| CI                                 | Confidence interval                                                |
| COVID-19                           | Coronavirus disease 2019                                           |
| Ct                                 | cycle threshold                                                    |
| CTCAE                              | Common Terminology Criteria for Adverse Events                     |
| ELISA                              | Enzyme, linked immunosorbent assay                                 |
| ER                                 | Emergency Department                                               |
| EuroQol                            | Europe Quality of life                                             |
| FDA                                | Food and Drug Administration                                       |
| FFP                                | Fresh frozen plasma                                                |
| FLU-PRO                            | FLU- patient-reported outcome measure                              |
| GCP                                | Good clinical practice                                             |
| ICH                                | International Council for Harmonisation                            |
| IFA                                | Indirect Fluorescent Antibody                                      |
| IgA/IgM/IgG                        | Immunoglobulin A / M / G                                           |
| IL-6                               | Interleukin 6                                                      |
| ILI                                | influenza-like illness                                             |
| ITT                                | Intention to treat                                                 |
| IV                                 | intravenous                                                        |
| MBT                                | Methylene blue treated                                             |
| MERS                               | Middle East respiratory syndrome                                   |
| ml                                 | millilitre                                                         |
| MT                                 | middle turbinate                                                   |
| NAT                                | nucleic acid amplification technology                              |
| NIH                                | National Institutes of Health                                      |
| OPD                                | Out-Patient Department                                             |
| OR                                 | Odds ratio                                                         |
| PaO <sub>2</sub> /FiO <sub>2</sub> | arterial partial pressure of oxygen to fraction of inspired oxygen |
| PCR                                | Polymerase chain reaction                                          |



|            |                                                 |
|------------|-------------------------------------------------|
| PP         | Per protocol                                    |
| qPCR       | Quantitative PCR                                |
| CRP        | C-reactive Protein                              |
| RSV        | Respiratory Syncytial Virus                     |
| RT-PCR     | Reverse transcriptase PCR                       |
| SAE        | Serious Adverse Event                           |
| SARS       | Severe acute respiratory syndrome               |
| SARS-CoV-2 | Severe acute respiratory syndrome coronavirus 2 |
| SD         | Standard Deviation                              |
| SMT        | Standard Medical Treatment                      |
| SpO2       | Peripheral Oxygen Saturation                    |
| SUSAR      | Serious Unexpected Adverse Reaction             |
| TACO       | Transfusion-Associated Circulatory Overload     |
| TRALI      | Transfusion-related acute lung injury           |
| UAE        | Unexpected adverse event                        |
| WHO        | World Health Organization                       |

## 2 BACKGROUND INFORMATION

Coronavirus disease 2019 (COVID-19) is a respiratory tract infection caused by a newly emergent coronavirus, severe acute respiratory syndrome coronavirus 2 (SARS-CoV-2), that was first recognized in Wuhan, China, in December 2019. The emergence of COVID-19 has caused a large global outbreak and it is a major public health issue. As of 13 August 2020, data from the World Health Organization (WHO) have shown that more than 20 million confirmed cases have been identified in 216 countries, areas or territories (WHO Interim guidance 13 August 2020) (1).

### 2.1 Convalescent Plasma

#### 2.1.1 *The use of Convalescent Plasma as treatment in infectious diseases*

Currently, there are no FDA-approved drugs for the treatment of COVID-19. Definitive clinical trial data is needed to find safe and effective treatments for COVID-19. Vaccine development is progressing at a rapid pace, but widespread vaccine availability is estimated to be at least six months away. There is an urgent need for effective interventions presently. Administration of SARS-CoV-2 neutralizing antibodies is the only form of immunization available in the absence of vaccines or humanized monoclonal antibodies.

Convalescent plasma therapy has been used to treat patients with infections using plasma collected from recently recovered individuals to transfer passive antibody immunity to those who have recently been infected or have yet to be exposed to the virus. Use of convalescent plasma has been studied in outbreaks of other respiratory infections, including the 2003 SARS-CoV-1 epidemic, the 2009-2010 H1N1 influenza virus pandemic, and the 2012 MERS-CoV epidemic (FDA recommendations) (2). Convalescent plasma from donors who have recovered from COVID-19 may contain antibodies to SARS-CoV-2 that might help suppress the virus and modify the inflammatory response. It has been postulated that neutralizing antibodies would prevent SARS-CoV-2 spike protein from attaching to the ACE2 receptor, inhibiting viral entry into the cell (Nguyen et al., 2020) (3).

#### 2.1.2 *Name and Description of the Investigational Plasma*

The investigational plasma in this study is Convalescent anti-severe acute respiratory syndrome coronavirus 2 (SARS-CoV-2) MBT Plasma.

The product is being collected by plasma centres in Spain.

#### 2.1.3 *Relevant Findings from Nonclinical and Clinical Trials*

There is already clinical trial data supporting the efficacy of convalescent plasma in the treatment of COVID-19 patients. An open-label, multicentre, randomized clinical trial conducted in China that enrolled 103 participants with laboratory-confirmed COVID-19 severe or life-threatening patients showed higher rates of viral clearance at 72 hours in the convalescent plasma group compared to the control group (87.2% vs 37.5%, respectively) (OR 11.39 [95% CI, 3.91-33.18];  $P < 0.001$ ), demonstrating association with antiviral activity of the treatment in patients with COVID-19 (Li et al., 2020) (4). A retrospective case-control study evaluating convalescent plasma conducted in Mount Sinai Hospital in New York City showed by day 14 a clinical worsening in 18% of the convalescent plasma patients vs 24% of the control patients ( $P = 0.17$ ), and a mortality of 13% of the plasma recipients and 24% of the control patients was observed ( $P = 0.04$ ) (Liu et al., 2020) (5). Preliminary data from a study from Mayo Clinic that aggregated patient outcome data from randomized clinical trials, matched control, and case-series studies showed that hospitalized COVID-19 patients transfused with convalescent plasma exhibited a 57% reduction in mortality rate (13%) compared to matched-patients receiving standard treatments (25%; OR: 0.43,  $P < 0.001$ ) (Joyner et al., 2020) (6).



The US FDA has approved the emergency use of convalescent plasma for patients with severe or life-threatening COVID-19 (Tanne, 2020) (7). And there are currently more than 100 ongoing studies evaluating convalescent plasma or hyperimmune immunoglobulin, of which approximately 50 are randomized (<https://clinicaltrials.gov/>).

Most clinical studies are investigating the use of convalescent plasma in hospitalized patients with severe or critical disease. However, this therapy may have clinical and virologic benefits in the treatment of mild or moderate disease in non-hospitalised patients, especially if given early in the disease course. Therefore, it is important to study the safety and efficacy of COVID-19 convalescent plasma in non-hospitalised patients in clinical trials.

#### **2.1.4 Safety**

Risks of passive administration of convalescent plasma fall into two categories, known and theoretical. Known risks are those associated with transfer of blood substances, which include inadvertent infection with another infectious disease agent and reactions to plasma constituents. With modern blood banking techniques that screen for blood-borne pathogens and match the blood type of donors and recipients, the risks of inadvertently transferring known infectious agents or triggering transfusion reactions are low. Additionally, MBT reduces risk of any pathogen undetected by donor screening and product testing. The most common adverse events are mild allergic or respiratory events (Piechotta et al., 2020) (8). Uncommon (i.e. in <1% of transfusions) but serious risks of convalescent plasma infusion may include transfusion-associated circulatory overload (TACO), transfusion-related acute lung injury (TRALI) and anaphylaxis (Joyner et al., 2020) (NIH Covid-19 treatment guidelines) (9, 10). And this should be a consideration in the risk-benefit assessment.

The theoretical risk is potential for antibody-dependent enhancement (ADE) of infection. ADE can occur in several viral diseases and it is a harmful, exaggerated inflammatory response triggered by antibodies. Previously, ADE has been proposed as an underlying pathogenic mechanism in Dengue haemorrhagic fever (Nguyen et al., 2020) (3). For coronaviruses, several mechanisms for ADE have been described, and there is the theoretical concern that antibodies to one type of coronavirus could enhance infection to another viral strain (Wan et al., 2020) (11). Since the proposed use of convalescent sera in the COVID-19 epidemic would rely on preparations presumably with high titers of neutralizing antibody against the same virus, SARS2-CoV-2, ADE may be unlikely. Available evidence from the use of convalescent plasma in patients with SARS and MERS (Mair-Jenkins et al., 2015) (12) and for the treatment of Covid-19, in the Expanded Access Program (EAP), with data from 20.000 hospitalised patients with COVID-19 (Joyner et al., 2020) (9), suggest it is safe. Nevertheless, in convalescent plasma trials, close monitoring to identify any evidence of enhanced infection will be required.

Given that historical and current data on use of convalescent plasma suggest it is safe in coronavirus infection, and the high mortality of COVID-19, particularly in elderly and vulnerable persons, suggests that the benefits of its use in those at high risk for or with early disease outweigh the risks. However, for all cases where convalescent plasma administration is considered, a risk-benefit assessment must be conducted to assess individual variables (Casadevall et al., 2020) (13).

#### **2.1.5 Justification for the Route of Administration, Dosage, Dosage Regimen, and Treatment Periods**

##### Administration of Convalescent Plasma/Placebo

Subjects in the Convalescent anti-SARS-CoV-2 MBT plasma plus SMT arm, will receive intravenous (IV) Convalescent anti-SARS-CoV-2 MBT plasma according to standard hospital infusion practices for fresh

frozen plasma (FFP). Subjects in the placebo plus SMT arm will receive sterile saline solution 0.9% by intravenous (IV) infusion.

### Justification for Selection of Volume of Administration and time of Convalescent Plasma/Placebo

Administration of Convalescent anti-SARS-CoV-2 MBT plasma in this study is consistent with previous experience with the administration of convalescent plasma for other infectious indications (e.g. Ebola) (van Griensven et al., 2016) (14) (Joyner et al., 2020) (9).

Randomized subjects will receive SMT plus one infusion of 200 to 300 ml of ABO-compatible convalescent plasma or placebo. Small adults weighing less than 45 kg will receive one infusion of 5 ml of ABO-compatible convalescent plasma or placebo per kilogram of body weight (to a maximum of 250ml).

## **2.2 Monitoring Efficacy of Treatment**

The WHO Working Group on the Clinical Characterisation and Management of COVID-19 Infection have developed a minimum set of common outcome measures for studies on COVID-19. The set includes three elements: a measure of viral burden, a measure of patient survival and a measure of patient progression. Study outcomes have been selected based on these recommendations (WHO Working Group on the Clinical Characterisation and Management of COVID-19 infection, 2020) (15).

### **2.2.1 Virologic Outcomes**

Viral burden is considered an appropriate core outcome for monitoring efficacy of treatment in COVID-19 patients. To measure viral burden, quantitative RT-PCR (RT-qPCR) to quantify viral copies is the best measure, with threshold cycle values (Ct) during PCR as an alternative. Quantification of viral burden has not proven yet to provide insight into the clinical status of the patient but does provide strong evidence of the presence of the pathogen, and it can be used to measure pathogen burden in response to treatment (WHO Working Group on the Clinical Characterisation and Management of COVID-19 infection, 2020) (15).

Viral load is associated with transmission risk and disease severity in other viral illnesses. And, recently, it has been reported SARS-CoV-2 viral load at diagnosis as an independent predictor of mortality in a large hospitalised cohort (n=1145). There was found a significant independent association between viral load and mortality (hazard ratio 1.07 [95% CI, 1.03-1.11],  $P=0.0014$ ), with a 7% increase in hazard for each log transformed copy per ml (Pujadas et al., 2020) (16). Viral load in COVID-19 might correlate, not only with mortality, but also with infectivity, disease phenotype and morbidity.

### **2.2.2 Clinical Outcomes**

Clinical progression will be measured using different validated scales.

Firstly, the WHO Clinical Progression Scale will be used and will assess **hospitalization rate** (i.e. who reach a score  $\geq 4$ ), as recommended for non-mortal clinical outcomes (WHO Working Group on the Clinical Characterisation and Management of COVID-19 infection, 2020) (15). This is an ordinal scale to measure clinical progression and recovery based on location and supportive measures used within the healthcare system. It provides a measure of illness severity across a range from 0 (not infected) to 10 (death) with data elements that are rapidly obtainable from clinical records.

Considering that our target population is non-hospitalised, ambulatory participants, and the rate of hospitalisation is relatively low, even in high-risk patients, we selected some other clinical progression scales to help assess clinical outcomes.

**Symptom severity** will be measured using a validated scale. Severity over time is been considered a clinically meaningful endpoint, particularly in a disease that exhibits such heterogeneous symptomatology.

Symptom severity will be also assessed with the FLU-PRO<sup>®</sup> PLUS Questionnaire, a daily self-score tool. The COVID-19 version, adapted from FLU-PRO<sup>®</sup> instrument, consists of 34 items that are answered daily. The FLU-PRO<sup>®</sup> is a self-administered patient-reported outcome measure (PRO) to quantify symptom severity in influenza and influenza-like illness and it has been tested and used in studies of influenza, influenza-like illness (ILI), respiratory syncytial virus (RSV), rhinovirus, and enterovirus (Han A et al., 2018) (17) (Powers JH et al., 2016) (18).

### 2.2.3 Inflammatory Markers

Biomarkers are quantitative measurements used clinically for many conditions reflecting pathological development. A recent systematic review summarized the following biomarkers with most evidence as predictors for a severe COVID-19 infection (Kermali et al., 2020) (19):

|                                    |           |
|------------------------------------|-----------|
| C-Reactive Protein (CRP)           | Increases |
| Serum amyloid A                    | Increases |
| Interleukin-6                      | Increases |
| Lactate Dehydrogenase              | Increases |
| Neutrophil-to lymphocyte ratio     | Increases |
| Lymphocyte count                   | Decreases |
| Platelet count                     | Decreases |
| D-dimer                            | Increases |
| Cardiac troponin                   | Increases |
| Renal biomarkers Urea & creatinine | Increases |

Endothelial cell activation and subsequent loss of integrity is a common pathway of injury induced by multiple life-threatening infections such as malaria, pneumonia, toxic shock, dengue, sepsis, etc, and mediators of these pathways have been shown to robustly and reliably identify at first clinical presentation those individuals at risk of dying or developing significant sequelae (AV Page 2013, 25 Balanza N 2020, 26). Remarkably, these “pathogen-agnostic” markers are superior to traditional biomarkers of systemic inflammation used in clinical practice, such as C-reactive protein (CRP), and others more recently adopted, such as Procalcitonin ( $p < 0.0001$ ) (Richard-Greenblatt M 2019, 27; Conroy AL, 2016, 28). Recently, one of these endothelial activation biomarkers have been shown to also predict ICU admission of COVID-19 patients (Smadja DM 2020, 29). Thus, to complement the study of inflammatory markers, biomarkers of endothelium activation might be also quantified in subsequent studies to be performed at the ISGlobal laboratories (Dr Carlota Dobaño, Dr Quique Bassat), using the remaining samples stored and authorized by the participants for future studies.

The biomarkers to be quantified are: procalcitonin (PCT), interleukin 8 (IL-8), soluble triggering receptor expressed on myeloid cells-1 (sTREM-1), angipoietin-2 (Ang-2) and soluble urokinase-type plasminogen activator receptor (suPAR). These biomarkers will be quantified at baseline to uncover their prognosis capacity to predict adverse outcomes at D60 during COVID-19 infection. Quantitative measurements of these biomarkers will be performed by quantitative suspension array technology (qSAT) using the xMAP Luminex platform and/or Ella<sup>TM</sup> platform.

#### **2.2.4 Quantification of Neutralizing Antibodies Against SARS-Cov-2**

Treatment of infectious diseases with therapeutic antibodies is an emergent field in clinical research. Although the major objective of this strategy is to block viral replication owing the antiviral effect of antibodies, the wide range of immunological functions of antibodies enlarges their potential benefit. In this regard, it has been widely documented that therapeutic antibodies exert a booster effect on humoral responses (Pelegrin et al., 2015) (20). Interestingly, this effect extends beyond the treatment period and may last once the therapeutic antibody has been cleared, suggesting that new specific B cells are being generated during the intervention (Schoofs et al., 2016) (21).

Therefore, we hypothesize that individuals treated with hyperimmune plasma might develop a better humoral response against SARS-COV-2 and therefore might show higher titers of neutralization in the long-term. To test this hypothesis, we plan to analyse the neutralizing activity of plasma or serum samples obtained in a subgroup of control and treated participants at three different timepoints: day 0 (before plasma infusion), day 7 (to quantify the impact of infused plasma on neutralizing activity) and day 60 (to quantify the long-term impact of plasma infusion on humoral immune responses). The increase in neutralizing titer between day 0 and day 60 will be compared between control and intervention groups to assess the potential booster effect of treatment. Intergroup comparison of absolute neutralization titers at day 0 and 7 will confirm similarity of pre-treatment and on-treatment titers, respectively, in control and treated participants.

Quantification of neutralizing antibodies against SARS-CoV-2 will be performed in blood samples of a subgroup of individuals. Since no data exist on COVID-19 patients regarding the impact of convalescent plasma on long-term neutralizing activity, the sample size calculation of the subgroup of participants needed will be based on the available data for other infectious diseases. Treatment of HIV infected individuals with a single injection of the broadly neutralizing antibody 3BNC117 induces a significant increase in neutralization titers that is maintained once the therapeutic antibody reaches undetectable plasma levels (Schoofs et al., 2016) (21). Assuming a similar impact on SARS-CoV-2 infected individuals (i.e., similar endpoint differences between groups and similar standard deviation of the measures reported for HIV) a total of 42 (enrolment ratio 1, 21+21) participants would be necessary to reach a statistical power of 80% to observe a difference between the treated and control groups at day 90 (Type I error rate 0.05). Different simulations assuming less favourable scenarios have been also performed. For instance, assuming a reduction of 50% in the difference of the means the sample size would increase to 122 (maintaining the other parameters). Thus 61 and 61 participants from the control and treated groups will be invited to participate in this substudy. This sample size enables to detect differences similar to those reported for HIV infection and is still powered (80%) to identify lower differences (50% reduction in the difference of the means between groups).

The analysis of neutralizing antibodies will be complemented with the characterization of the type, magnitude, specificity, quality and breadth of antibody response in subsequent studies to be performed at the ISGlobal laboratories (Dr Carlota Dobaño), using the remaining samples stored and authorized by the participants for future studies. The analysis includes the measurement of immunoglobulin isotypes and subclasses (including but not limited to IgM, IgA, IgG) to a panel of SARS-CoV-2 antigens (including but not limited to spike and nucleocapsid proteins in multiplex) by quantitative suspension array technology (qSAT) using the xMAP Luminex platform.

#### **2.2.5 Sample Collection Method**

Increase diagnostics are urgently needed to contain the spread of COVID-19. Home self-collecting of swabs may increase testing through improving accessibility outside the healthcare system while

minimizing exposure risk and personal protective equipment use. This approach could be safe and scalable in the pandemic setting, allowing for early community detection of COVID-19.

Recent data support the validity of non-nasopharyngeal samples for detection of SARS-CoV-2 (To et al., 2020) (22). There is also some data supporting the use of self-collected respiratory swabs (Tu et al., 2020) (23), particularly in symptomatic patients with higher viral loads (McCulloch et al., 2020) (24). Self-collected mid-turbinate samples had a sensitivity of 96,2% (97,5% CI, 87-100%) when compared with nasopharyngeal samples collected by a health care worker (Tu et al., 2020) (23). And self-collected midnasal swabs had a sensitivity of 80% (95% CI, 63%-91%) and a specificity of 97,9% (95% CI, 94%-99,5%) when compared with clinician-collected nasopharyngeal swabs for detection of SARS-CoV-2 infection (McCulloch et al., 2020) (24).

In line with available data, nasopharyngeal swabs will be paired with mid-turbinate (MT) swabs at baseline visit to gather further evidence to support clinical performance of self-collected MT swabs.

### 2.3 Hypotheses

This is a prospective, randomized (1:1), double blind study of convalescent anti-SARS-CoV-2 MBT plasma plus standard medical treatment (SMT) versus placebo plus SMT in mild or moderate COVID-19 patients who are non-hospitalised. Convalescent plasma will be provided to patients to assess reduction of viral load and inflammation, clinical efficacy, safety, and tolerability. Patients will be randomly allocated in an experimental or control placebo arm.

The study data and interim results will be monitored by an independent Data Safety and Monitoring Board (DSMB), following the procedures described in **ANNEX 7**. The main task for the DSMB will be to assess whether the randomized comparisons provide evidence on the primary outcomes, sample size re-calculation, safety or futility with evidence strong enough to affect current treatment strategies. In such a circumstance, the DSMB will inform the coordinating investigator and sponsor, who will discuss whether to make the results available to the public. Regardless, follow-up will continue for all randomized individuals.

The hypotheses of the study are the following:

1. Non-hospitalised mild or moderate COVID-19 patients receiving convalescent MBT plasma infusion will have a greater reduction in the severity of disease than those receiving placebo, reflected in a reduction of hospitalization rates.
2. Non-hospitalised mild or moderate COVID-19 patients receiving convalescent MBT plasma infusion will have a lower virologic load on day 7 than those receiving placebo.
3. Non-hospitalised mild or moderate COVID-19 patients receiving convalescent MBT plasma infusion will have a greater reduction in the severity of COVID-19 symptoms than those receiving placebo.
4. Non-hospitalised mild or moderate COVID-19 patients receiving convalescent MBT plasma infusion will have a shorter time to resolution of COVID-19 symptoms than those receiving placebo.
5. Non-hospitalised mild or moderate COVID-19 patients receiving convalescent MBT plasma infusion will have a greater reduction in the severity of disease than those receiving placebo, reflected in a reduction of mortality rates.

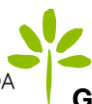

6. Non-hospitalised mild or moderate COVID-19 patients receiving convalescent MBT plasma will have a similar number and grade of AEs over a 28-day period, compared to those receiving placebo.
7. Non-hospitalised mild or moderate COVID-19 patients receiving convalescent MBT plasma will have blood lower levels of ferritin, IL-6, D-dimer, CRP, and leucocyte counts, and higher levels of prealbumin and lymphocyte count on day 7, compared to those receiving placebo.
8. Non-hospitalised mild or moderate COVID-19 patients receiving convalescent MBT plasma and placebo will confirm similarity of pre-treatment and on-treatment titers of neutralizing antibodies to SARS-CoV-2 among them on day 7.
9. Non-hospitalised mild or moderate COVID-19 patients receiving convalescent MBT plasma will reach higher titers of neutralizing antibodies to SARS-CoV-2 on day 60 than those receiving placebo, showing a better humoral response.
10. Self-collected MT swab and self-collected saliva will be suitable alternative samples to nasopharyngeal swabs collected by a healthcare worker to evaluate SARS-CoV-2 viral load.

### **3 STUDY OBJECTIVES**

#### **3.1 Primary Objectives**

1. Assess the therapeutic potential of early administration of convalescent MBT plasma in reducing the rate of hospitalization at day 28 in non-hospitalised mild or moderate COVID-19 patients.
2. Assess the therapeutic potential of early administration of convalescent MBT plasma in reducing SARS-CoV-2 viral load at day 7, measured by quantitative RT-PCR (RT-qPCR) in non-hospitalised mild or moderate COVID-19 patients.

#### **3.2 Secondary Objectives**

1. Assess the therapeutic potential of early administration of convalescent MBT plasma in reducing WHO Clinical progression scale score in non-hospitalised mild or moderate COVID-19 patients.
2. Assess the therapeutic potential of early administration of convalescent MBT plasma in reducing the severity of common COVID-19 symptoms, measured with the FLU-PRO® PLUS scale, in non-hospitalised mild or moderate COVID-19 patients.
3. Assess the therapeutic potential of early administration of convalescent MBT plasma in reducing the duration of symptoms in non-hospitalised mild or moderate COVID-19 patients.
4. Assess the therapeutic potential of early administration of convalescent MBT plasma in reducing the mortality at day 60 in non-hospitalised mild or moderate COVID-19 patients.
5. Evaluate the safety and tolerability of convalescent MBT plasma in non-hospitalised mild or moderate COVID-19 patients.
6. Assess the change from baseline to day 7 of ferritin, prealbumin, interleukin 6 (IL-6), D-dimer, C reactive protein (CRP), and leukocytes and lymphocytes counts in peripheral blood in non-hospitalised mild or moderate COVID-19 patients receiving convalescent MBT plasma. Additional novel prognosis biomarkers might be quantified in subsequent studies.
7. Assess the impact of infused plasma on neutralizing activity by quantifying the change from baseline to day 7 in neutralizing antibodies against SARS-CoV-2 in peripheral blood in non-hospitalised mild or moderate COVID-19 patients receiving convalescent MBT plasma. Type, magnitude, specificity, quality and breadth of the antibody response will be characterized in subsequent studies.
8. Assess the long-term impact of plasma infusion on humoral immune responses, by quantifying the change from baseline to day 60 in neutralizing antibodies against SARS-CoV-2 in peripheral blood in non-hospitalised mild or moderate COVID-19 patients receiving convalescent MBT plasma. Type, magnitude, specificity, quality and breadth of the antibody response will be characterized in subsequent studies.
9. Compare agreement and SARS-CoV-2 viral load in self-collected middle turbinate (MT) swab and self-collected saliva samples with nasopharyngeal swab samples collected by a healthcare worker.
10. Assess the therapeutic potential of early administration of convalescent MBT plasma in reducing SARS-CoV-2 viral load at day 28, measured by quantitative RT-PCR (RT-qPCR) in non-hospitalised mild or moderate COVID-19 patients.

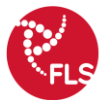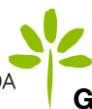

## 4 TRIAL DESIGN

### 4.1 Type of Trial

This is a multi-site, randomized, controlled with placebo, double blind, parallel study.

### 4.2 Description of the Design

This is a prospective, randomized (1:1), double blind, study of convalescent anti-SARS-CoV-2 MBT plasma plus standard medical treatment (SMT) versus placebo plus SMT in mild or moderate COVID-19 patients who are non-hospitalised. Subjects with a confirmed SARS-CoV-2 infection as determined by positive polymerase chain reaction (PCR) or validated antigen rapid diagnostic test from nasopharyngeal swabs will receive SMT plus one single infusion of 200- 300 ml of convalescent plasma that has been pathogen-inactivated using methylene blue treatment (MBT) or 200- 300 ml of placebo.

The study will be announced on social media and the press (see ANNEX 6 for dissemination). Primary care centres (CAPs) will inform SARS-CoV-2 positive candidates of the possibility to volunteer in the study. At the CAPs, this information will be given during the medical visit in which patients are informed of their PCR positive result.

Study candidates will voluntarily register at the study website "[www.estudicovid19.org/](http://www.estudicovid19.org/)" for SARS-CoV-2-positive individuals to volunteer in COVID-19 clinical trials (see ANNEX 6 for web content), and will provide an authorization to access their shared medical record.

In order to minimize the transfers of COVID-19 patients, given the risk of contagion that this would entail, eligibility of candidates will be assessed by study physicians in a remote screening visit, based on the revision of regional shared medical records (*Història Clínica Compartida de Catalunya HC3*), during an interview with the candidate. Non-eligible candidates will be informed of the reason for non-eligibility. Eligible candidates will be scheduled an inclusion/baseline visit.

In the inclusion/baseline visit, candidates will be informed in person about the study, formally invited to participate, and the informed consent will be obtained. Once each candidate has signed the informed consent, he/she will undergo the required clinical procedures for final eligibility assessment (i.e., physical examination and a urine pregnancy test). Non-eligible candidates will be informed about the reason for their non-inclusion.

Candidates will also be identified at emergency room (ER) and/or outpatient departments (OPDs) of the participating sites. In this case, the remote screening visit will not be necessary; an inclusion/baseline visit will be the performed, where the candidate will be informed in person about the study, invited to participate and the informed consent will be obtained before the assessment of eligibility.

Eligible candidates will be randomized. To avoid unnecessary tests, ABO compatibility test will be performed only in those that will receive convalescent plasma. The results of the tests will be known only by the unblinded study nurse and the information will be kept blinded for the rest of the study team.

Randomized participants will be administered a single intravenous (IV) infusion at baseline (convalescent plasma or placebo). The administration will be performed by an unblinded study nurse, but both the investigator and the participant will be blinded to the investigational product

Specifically, subjects randomized to combination convalescent anti-SARS-CoV-2 MBT plasma plus SMT will receive one infusion of 200 to 300 ml of ABO-compatible convalescent plasma. Subjects





randomized to combination placebo plus SMT will receive one infusion of 200 to 300 ml of sterile saline solution 0.9%. Infusion will be administered at baseline, using standard operating procedures (SOPs) that will be in place before the study start. Small adults weighing less than 45 kg will receive one infusion of 5 ml of convalescent plasma or placebo per kilogram of body weight (to a maximum of 250ml of convalescent plasma or placebo).

Samples of the infused convalescent anti-SARS-CoV-2 MBT plasma will be obtained before infusion for quantitative measurement of neutralizing antibodies against SARS-CoV-2.

Nasopharyngeal and blood samples will be obtained from all participants at inclusion/baseline visit, on day 7 and on day 28. Nasopharyngeal samples will be used to assess SARS-CoV-2 viral load quantification. Blood samples will be used to assess viral load in nasopharyngeal swabs and inflammatory prognostic markers (ferritin, prealbumin, interleukin 6, D-dimer, C reactive protein leukocyte and lymphocyte counts). Leftovers of plasma will be stored for future investigations.

Participants will be trained on the completion of symptoms and safety diary card.

The symptoms and safety diary card will be filled by the participants daily from baseline up to day 14. Self-reported data will be collected using an electronic case report form (eCRF). Paper forms will be available for those participants who are unable to submit data using eCRF, in which scenario data will be collected at follow-up visits on day 7 and by a study courier on day 15. If the participant reports any new symptom with grade 4 at the FLU-PRO<sup>®</sup> PLUS questionnaire, he or she will be contacted by telephone by the study staff to evaluate the need of an extra home visit. Participants will be also given a contact number to report AEs, to seek medical advice, and resolve any question related to the study. The investigator team will review the symptoms and safety diary cards on days 3, 7, and 14, to assess compliance with self-reporting data. For participants who do not respond to follow-up surveys, investigators will use emails or telephone calls to ascertain outcomes from them.

On follow-up visits on days 3, 7, 14, and 28, all participants will be assessed for clinical and safety outcomes. These visits will be all by telephone except for the day 7 and the day 28 visits. Day 7 will be a visit at home or at the hospital, where additionally nasopharyngeal swabs and blood samples will be collected. Day 28 will be a hospital visit, where additionally nasopharyngeal swabs sample will be collected

At day 60, all participants will be assessed by telephone for health-status outcome.

If the participant is unreachable at phone follow-up visits, clinical progression, as well as possible AEs will be assessed through medical record (*Història Clínica Compartida, HC3*), in order to assess all the study outcomes.

Results of the sample analyses are not necessary for participants to remain in the study to continue in the study, and participants will only be informed of relevant results for their health.

Participation in the substudy will be offered at the inclusion/baseline visit to a maximum of 135 participants in selected sites and those who accepts will sign a substudy specific informed consent. At baseline, the participants of the substudy will be drawn an extra tube of blood sample and will be trained on self-collection of middle turbinate (MT) swabs and saliva, and self-collected samples will be obtained. On day 7, an extra tube of blood sample will be obtained, and they will be asked to self-collect MT swabs and saliva. And on day 60, an extra tube of blood sample will be obtained during an additional home or hospital visit. The extra tube in both days 7 and 60 will be stored for neutralizing antibodies assessment. MT swabs and saliva samples will be compared with nasopharyngeal swabs for SARS-CoV-2 viral load quantification. Leftovers of plasma will be stored for future investigations.

### 4.3 Study Endpoints

#### 4.3.1 Primary endpoint(s)

- Hospitalization rate (i.e., who reach a score  $\geq 4$  in the WHO scale for clinical progression) [Time Frame: Up to 28 days after reception of investigational product]
- Reduction of SARS-CoV-2 viral load in nasopharyngeal swabs at day 7 after start of treatment, as determined by RT-qPCR. [Time Frame: Up to 7 days after reception of investigational product]

#### 4.3.2 Secondary endpoints

1. Change in COVID-19 WHO Clinical progression scale score [Time Frame: Up to 60 days after reception of investigational product]
2. Change in COVID-19 symptoms severity score, assessed with the COVID-19 daily self-score tool (FLU-PRO<sup>®</sup> PLUS instrument) [Time Frame: Up to 14 days after reception of investigational product]
3. Time to complete resolution of symptoms [Time Frame: Up to 28 days after reception of investigational product]
4. Death rate [Time Frame: Up to 60 days after reception of investigational product]
5. Proportion of patients with adverse events (AE) and proportion of grade  $\geq 4$  AE, based on the FDA Toxicity Grading Scale for Healthy Adult and Adolescent Volunteers scale [Time Frame: Up to 28 days after reception of investigational product]
6. Change in inflammatory prognostic markers (ferritin, prealbumin, interleukin 6 (IL-6), D-dimer, C reactive protein (CRP) and leukocyte and lymphocyte counts) [Time Frame: Baseline and day 7 after reception of investigational product]
7. Intergroup comparison of absolute neutralization titers against SARS-CoV-2 in plasma of a subgroup of participants [Time Frame: Baseline and day 7 after reception of investigational product]
8. Change in titers of neutralizing antibodies against SARS-CoV-2 in plasma of a subgroup of participants [Time Frame: Baseline and day 60 after reception of investigational product]
9. Agreement and SARS-CoV-2 viral loads of self-collected middle turbinate (MT) swab and self-collected saliva compared to nasopharyngeal swabs collected by a healthcare worker [Time Frame: Baseline and day 7 after reception of investigational product].
10. Reduction of SARS-CoV-2 viral load in nasopharyngeal swabs at day 28 after start of treatment, as determined by RT-qPCR. [Time Frame: Up to 28 days after reception of investigational product].

### 4.4 Measures to Avoid Bias

The following measures will be used to avoid bias: Randomization and blinding.

#### 4.4.1 Randomization

Participants will be randomly allocated using the study eCRF in a ratio of 1:1 between the convalescent plasma arm (experimental) and the placebo arm (control).

Randomization will be centralized at the blood bank during the inclusion/baseline visit, after confirmation of eligibility. ABO compatibility test will be performed for the experimental arm.

#### **4.4.2 Stratification**

There will not be stratification.

#### **4.4.3 Blinding**

This will be a double blind, placebo-controlled study. Masking of investigational products will ensure that both the investigator and the participant are blinded to the product administered.

Opaque bags will be used for masking the investigational products. Convalescent plasma infusion is to be performed using a filter, that opaque infusion system does not include. The investigational product and the system will be covered with opaque bags and opaque tubular bags. Nevertheless, convalescent plasma and placebo have very different appearance and the masking might not be completely efficient for the study nurse manipulating the IV cannula.

To ensure blinding of the participant and the investigators assessing the study outcomes, the following operational measures will be used:

- Randomization and preparation of the investigational product will be performed in the blood bank by unblinded staff, who will cover the investigational product with opaque bags.
- Infusion will be performed by an unblinded study nurse, using an opaque tubular bag to cover the infusion system. Neither the study physician nor the participant will be informed about the investigational product received.
- Study outcomes will be assessed by blinded study physicians. Should the physician assess clinical progression and/or AEs through medical record, specific measures will be used to avoid being informed of the product infused.

#### **4.4.4 Unblinding**

Unblinding of an individual participant will be indicated in the event of a medical emergency where the clinical management of the participant would be altered by knowledge of the investigational product received. In any situation, every attempt will be made to minimize the number of participants unblinded. If the blind is broken for any reason, this will be recorded and the sponsor will be notified immediately. Instructions for unblinding will be provided to the study investigators. Participants will be given a "study participant ID card" including information regarding the study and the contact details of the investigators team (**ANNEX 9**).

Global unblinding for the study team will be performed after the statistical analyses are finalized, and participants will be informed of the treatment received.

#### **4.4.5 Identification of Subjects**

The participant ID will consist of a sequential number that will be assigned to each participant at the inclusion/baseline visit. This number will be used as a unique identifier for each participant throughout the study.

### **4.5 End of Study**

The date of the end of the study will be the last visit of the last participant.

The study will be completed when any of these premises are met:

- Inclusion of the number of participants needed for the sample size and end of clinical study visits.
- The DSMB recommends completing the study prematurely for safety reasons.
- Sponsor or principal investigator decision.



If the study must be interrupted prematurely, all non-used materials should be returned to the sponsor. The principal investigator will keep the investigator's site file and a copy of the completed eCRF.

In case there were no participants included in the study, the sponsor will take care of all materials.

#### **4.6 Source Data**

Source documents will be the participants' electronic health records including laboratory results obtained from blood and swab tests.

The symptom and safety diary card, composed of different adapted questionnaires described in section 7, will be considered source document and will be collected directly on the eCRF (filled by the participant and reviewed by the investigator). Paper questionnaires may also be used by participants who are unable to use the eCRF.

Study data will be collected through an eCRF.

All investigational results obtained from study sample analyses will be recorded in separated electronic databases, which will be merged with the clinical study data for statistical analysis.

## 5 STUDY INVESTIGATIONAL PRODUCTS

### 5.1 Experimental and Control Investigational Products

The experimental investigational product will be ABO-compatible SARS-CoV-2 convalescent anti-SARS-CoV-2 MBT plasma and the control investigational product will be sterile saline solution 0.9%.

Investigational products will be administered in addition to the standard medical treatment (SMT) for COVID-19 disease prescribed by their regular physicians.

### 5.2 Arm Description

After confirmation of eligibility at the inclusion/baseline visit, participants will be randomly allocated to one of the following arms:

| Arm                     | Investigational Product / Treatment                                                                                                                    |
|-------------------------|--------------------------------------------------------------------------------------------------------------------------------------------------------|
| <b>EXPERIMENTAL ARM</b> | The participant will receive one infusion of 200 to 300 ml of ABO-compatible convalescent MBT plasma with neutralizing SARS-CoV-2 antibodies plus SMT. |
| <b>CONTROL ARM</b>      | The participant will receive one infusion of 200 to 300 ml of sterile saline solution 0.9% via IV plus SMT.                                            |

### 5.3 Supply, Packaging, Labelling and Storage

#### 5.3.1 Supply

Convalescent MBT plasma will be supplied by the “Banc de Sang i Teixits, BST”.

Commercial saline solution 0.9% will be supplied by the sponsor.

Details regarding donor selection, collection and processing procedures for convalescent MBT plasma preparation from donors recovered from COVID-19 can be found in **ANNEX 1**.

#### 5.3.2 Packaging and Labelling

Packaging and labelling of convalescent plasma and placebo will comply with local regulatory requirements.

#### 5.3.3 Storage

Investigational products will be stored at the blood bank facilities of each study site.

Convalescent anti-SARS-CoV-2 MBT plasma will be stored to the conditions of temperature, humidity and light as defined in the “Banc de Sang i Teixits” standard procedures (**ANNEX 1**).

Commercial saline solution 0.9% will be stored at room temperature.

#### 5.3.4 Preparation and Blinding

Standard operating procedures (SOPs) will be in place for the preparation and blinding of the investigational products.

Both convalescent anti-SARS-CoV-2 MBT plasma and saline solution 0.9% will be prepared for infusion by unblinded personnel. Convalescent anti-SARS-CoV-2 MBT plasma will be thawed before being

covered by an opaque bag, while saline solution 0.9% will be directly covered by an opaque bag. To avoid a blinding breach, the time of preparation and blinding will be approximately the same for both investigational products.

Convalescent anti-SARS-CoV-2 MBT plasma will be thawed following the “Banc de Sang i Teixits” standard procedures.

Opaque bags will be labelled in the same manner, including at least the participant ID and the permitted time frame of infusion. Opaque tubular bags will be used to cover the infusion system. Infusion will be performed by study personnel, adhering to the time frames and storage conditions defined in the “Banc de Sang i Teixits” standard procedures (**ANNEX 1**).

## **5.4 Dose, Interval, Route and Method of Administration**

### ***5.4.1 Dose, Interval, and Route***

Participants will receive one infusion of 200 to 300 ml ABO-compatible convalescent anti-SARS-CoV2 MBT plasma or saline solution 0.9% at baseline.

Small adults weighing less than 45 kg will receive one infusion of 5 ml of ABO-compatible convalescent plasma or saline solution per kilogram of body weight.

### ***5.4.2 Administration and Timing of Investigational Plasma for Each Subject***

Investigational products will be infused using standard procedures for administration of fresh frozen plasma, which will be detailed in the study SOPs.

Start and end of infusion time will be recorded. Vital signs will be measured immediately before the start of infusion, and immediately after the completion of infusion. Participants will remain under observation for 20-30 minutes after the completion of the infusion to monitor AEs.

## **5.5 Modification of the Treatment Regimen**

No changes in treatment regimens are expected. If an AE develops during infusion, the infusion will be slowed or stopped as per investigator’s decision. Infusion of the investigational product will be halted if any manifestations of anaphylaxis develops, and it will not be restarted.

## **5.6 Prior and Concomitant Treatments**

SMT and treatments administered at baseline, and during the study up to day 28 will be considered concomitant treatments, will be recorded in the medical clinical record and in the eCRF, including the trade and/or generic names of the medication, the dose (if known), the route of administration, and the duration of the medication (frequency).

Medicines for transfusion reactions (e.g. paracetamol, dexchlorpheniramine) may be given as a treatment, if necessary.

There are no prohibited medications prior to study participation or during the study.

There are no restricted concomitant medications.

## **5.7 Accountability Procedures for Investigational Product**

The investigator, or designee such as the blood bank personnel or study nurse, will keep the investigational products accountability.



Investigational products will be used only for the study in accordance with the directions given in this protocol.

The investigator, or designee such as the blood bank personnel or study nurse, is responsible for handling of the investigational products in accordance with the directions given in the protocol and in the study SOPs. The investigator is responsible for maintaining accurate records of the investigational product for the site. Documentation verifying receipt, dispensing, destruction, or return of the investigational products will be maintained by the investigator or designee and will be made available to the study monitor/relevant authorities for review. Inventory dispensing logs must be verified by the monitor. At the end of the study, a copy of the inventory/dispensing log(s) will be retrieved by the monitor, and the original document will be stored in the trial master file.

### **5.8 Treatment Compliance**

A study nurse will perform the investigational product administration, and he/she will register the incidences occurring during the procedure.

## 6 SELECTION AND WITHDRAWAL OF SUBJECTS

### 6.1 Study population

Individuals with confirmed infection by SARS-CoV-2 from different regions of Catalonia.

### 6.2 Inclusion Criteria

1. Adult male or female individuals of  $\geq 50$  years old.
2. In women of childbearing potential<sup>1</sup>, negative pregnancy test at inclusion/baseline visit.
3. Has confirmed SARS-CoV-2 infection as determined by PCR or validated antigen rapid diagnostic test<sup>2</sup> from nasopharyngeal swabs  $\leq 5$  days prior to inclusion/baseline visit.
4. Symptomatic with mild or moderate COVID-19 with symptoms onset date  $\leq 7$  days prior to inclusion/baseline visit.
  - a. Mild COVID-19: Individuals who have any of the common signs and/or symptoms of COVID-19 (i.e., fever, cough, sore throat, malaise, headache, muscle pain) without shortness of breath, dyspnoea, or abnormal chest imaging.
  - b. Moderate COVID-19: Individuals who have evidence of lower respiratory disease by clinical assessment or imaging and a saturation of oxygen (SpO<sub>2</sub>)  $\geq 94\%$  on room air at sea level.
5. Willing to comply with the requirements of the protocol and available for follow-up for the planned duration of the study.
6. Has understood the information provided and capable of giving informed consent.

<sup>1</sup>A woman will be considered of childbearing potential if not permanently sterilized nor postmenopausal. Permanent sterilization methods include tubal ligation, hysterectomy and bilateral oophorectomy. Postmenopausal is defined as 12 months with no menses without an alternative medical cause.

<sup>2</sup>Panbio™ COVID-19 Ag Rapid Test (Abbott), STANDARD™ Q COVID-19 Ag Test (Roche) or any other CE marketed test for SARS-CoV-2 Ag detection.

### 6.3 Exclusion Criteria

1. If female, pregnant or breastfeeding, or planning a pregnancy during the study.
2. Severe or critical COVID-19:
  - a. Severe COVID-19: respiratory frequency  $>30$  breaths per minute, SpO<sub>2</sub>  $<94\%$  on room air at sea level, ratio of arterial partial pressure of oxygen to fraction of inspired oxygen (PaO<sub>2</sub>/FiO<sub>2</sub>)  $<300$  mmHg, or lung infiltrates  $>50\%$ .
  - b. Critical COVID-19: respiratory failure, septic shock, and/or multiple organ dysfunction.
3. Current hospital admission for any cause.
4. History of previous confirmed SARS-CoV-2 infection.
5. History of significantly abnormal liver function (Child Pugh C).
6. History of chronic kidney disease (CKD)  $\geq$  stage 4, or need of dialysis treatment.
7. Any pre-existing condition that increases risk of thrombosis.
8. History of allergic reactions to blood or plasma products or methylene blue.
9. Known IgA deficiency with anti-IgA antibodies.
10. Medical conditions for which 20–300 ml of intravenous fluid is considered dangerous (i.e., decompensated heart failure or renal failure with fluid overload).
11. Inability to consent and/or comply with study protocol, in the opinion of the investigator.



12. Currently participating or planning to participate in any interventional study for the treatment of COVID-19 or SARS-CoV-2 infection until day 60.
13. Previous vaccination with any COVID-19 vaccine.

## **6.4 Subject Withdrawal Criteria**

### ***6.4.1 Early Subject Withdrawal***

Participants will prematurely end their participation in the study in the following circumstances:

- At their own request.
- If, in the investigator's opinion, continuation in the study would be detrimental to the subject's well-being.
- At the specific request of the sponsor.
- The participant is not able to adhere to the main protocol requirements, in the opinion of the investigator.
- In the exceptional case of non-availability of ABO-compatible convalescent plasma.
- Other (the reason will be specified).

As a general rule, a participant will remain in the study as long as the primary outcome measures are available.

### ***6.4.2 Medical Approach to Withdrawal***

Withdrawals will be notified to the sponsor and the date and reason for the withdrawal will be collected. The investigator will provide adequate medical support to the participant if required if required.

### ***6.4.3 Follow-up after Early Withdrawal***

Randomized participants who withdraw will be followed up to day 28 for clinical and safety outcomes and up to day 60 for health status outcome, except in case the reason of withdrawing is voluntary.

### ***6.4.4 Replacement of Participants***

Replacement of participants will be allowed only in case of early withdrawal happening before the start of the infusion of investigational product.

Participants withdrawn after the start of the infusion will not be replaced.

### ***6.4.5 Pre-randomization Loses***

All candidates considered for the study will be registered on the screening list, including the reasons for non-suitability or non-attendance to the inclusion/baseline visit.

Candidates who sign the informed consent will undergo an inclusion/baseline visit; those who are found not eligible will not be randomized, but data from the visit and the reason for non-inclusion will be recorded in the eCRF.

Subject re-screening will not be performed.

## 7 STUDY CONDUCT AND ASSESSMENT OF RESPONSE

### 7.1 Study Visits and Procedures

#### 7.1.1 Recruitment procedures

Candidates will be recruited from:

- Voluntary register through the study website (“[www.estudicovid19.org/](http://www.estudicovid19.org/)”), where candidates will be asked essential questions to preliminary assess their suitability (see **ANNEX 6** for web content). The registration on the website will entail an authorization to access the candidate shared medical records to permit a preliminary assessment of eligibility over the phone.
- Invitation through ER or OPD staff of the participating sites, where candidates be invited to participate by study physicians on-site.
- Invitation by telephone call in a follow-up visit to patients with confirmed SARS-CoV-2 infection who appear in a list of positive PCR or rapid antigen test from the laboratory of the participating sites.

#### 7.1.2 Screening

With the aim of minimizing the transfers of COVID-19 patients, given the risk of contagion that this would entail, candidates who voluntarily register on the study website will be assessed for eligibility for the study by study physicians based on the revision of regional shared medical records (*Història Clínica Compartida de Catalunya HC3*) during a phone interview. Non-eligible candidates will be informed of the reason for non-eligibility. Eligible candidates will be scheduled an inclusion/baseline visit.

Candidates identified through ER or OPD of the participating sites will be informed about the study and if interested, will be directed to the inclusion/baseline visit to obtain informed consent and assess eligibility on-site.

A record containing all evaluated candidates and reasons for non-inclusion will be in place for the study (i.e., screening log).

#### 7.1.3 Inclusion/baseline

The inclusion/baseline visit will be a hospital setting visit with a study physician and a study nurse, either at the hospital or, if safe requirements detailed on the study SOPs are met, at home by Hospital at home care unit staff (*Hospitalització domiciliària*).

The procedures will be the following:

1. In-person information of study details
2. Informed consent form signature
3. Urine pregnancy test in females of child-bearing potential
4. Interview of the participant:
  - a. Record demographic data.
  - b. Record of SARS-CoV-2 PCR or antigen RDT result (including date of analysis).
  - c. Identification baseline medical conditions and concomitant treatment.
  - d. Identification of date of onset of COVID-19 symptoms.
5. Physical examination (including measuring weight and height) and vital signs (Body temperature, Oxygen saturation, Respiratory rate, Heart rate, Blood pressure).

6. Verification of inclusion and exclusion criteria. In case of non-inclusion, the participant will be informed of the reason and the study staff will provide the necessary medical attention.

If the participant is found eligible, the study staff will perform the following procedures:

1. In the selected sites, offer participation in the substudy and sign the specific informed consent.
2. Classification of baseline severity of COVID-19 using WHO scale.
3. Blood draw:
  - a. Blood sample collection for an ABO-compatibility test (which will be performed in case the participant is assigned to convalescent plasma group).
  - b. Blood sample collection for inflammatory prognostic markers (ferritin, prealbumin, IL-6, D-dimer, CRP, and leukocyte and lymphocyte counts).
  - c. Blood sample collection for storage at IrsiCaixa.
  - d. In substudy participants, blood sample collection for quantification of neutralizing antibodies against SARS-CoV-2.
4. Nasopharyngeal swabs collection by study nurse.
5. In the substudy participants, training of the participant on the process of self-collection of MT swabs and saliva samples, and self-collection of MT swabs and saliva samples by the participant.
6. Training in the completion of the symptoms and safety diary card, which will be filled by the participant at baseline and daily until day 14, using the study an eCRF. Paper forms will be available for those participants who are unable to submit electronic data using eCRF, and in this scenario data will be collected in the eCRF at follow-up visits on day 7 and by a study courier on day 15.
  - a. If the participant reports any new symptom with grade 4 at the FLU-PRO<sup>®</sup> PLUS questionnaire, he or she will be contacted by telephone by the study staff to evaluate the need of an extra home visit
  - b. Participants will be also given a contact number to report AEs, to seek medical advice, and resolve any question related to the study.
7. Randomization to assign the participant to a study arm, centralized at the Blood Bank facilities by study staff.
8. In case of convalescent plasma is assigned, the blood bank staff will perform the ABO compatibility test using standard guidelines for blood transfusion laboratories.
9. Preparation and blinding of ABO-compatible convalescent plasma or placebo to be administered.
10. Transport of the investigational product from the Blood Bank to the place of infusion.
11. Administration of a single infusion of 200 to 300 ml, of investigational product (either convalescent plasma or placebo).
  - a. Time at start and end of infusion will be recorded.
  - b. Infusion will be done in accordance with the standard policies for administration of blood and routine administration of fresh frozen plasma, and study specific SOPs will be in place.
  - c. If an AE develops during infusion, the infusion will be slowed or stopped as per investigator's decision. Infusion will be halted if any manifestation of anaphylaxis develops, and will not be restarted.

- d. Vital signs (Temperature, Oxygen saturation, Respiratory rate, Heart rate, Blood pressure) will be measured at immediately after the completion of infusion.
  - e. Medicines for infusion reactions (e.g. paracetamol, dexchlorpheniramine) may be given as a treatment, if necessary.
12. Monitoring of AEs for a period of 20-30 minutes after the completion of the infusion.
  13. Provide the participant with the “study participant ID card” (**ANNEX 9**), and instruct the participant to always carry the card with him/her.

#### **7.1.4 Day 3**

The participant will be contacted by telephone by study staff for safety and clinical follow-up. Specifically,

1. Revision of symptom and safety daily data, and discussion of inconsistencies with the participant.
2. Classification of severity of COVID-19 using WHO scale.
3. AEs will be assessed by the study staff.
4. If deemed necessary, AEs will be informed to and reviewed by the study physician, and medical attention will be given when necessary.

#### **7.1.5 Day 7**

The participant will be visited at home or at the hospital by study staff, and the following procedures will be performed:

1. Vital signs (Temperature, Oxygen saturation, Respiratory rate, Heart rate, Blood pressure).
2. Blood draw:
  - a. Blood sample collection for inflammatory prognostic markers (ferritin, prealbumin, IL-6, D-dimer, CRP, and leukocyte and lymphocyte count). This sample will be sent to the laboratory for a routine processing.
  - b. In the substudy participants, blood sample collection for quantification of neutralizing antibodies against SARS-CoV-2.
3. Nasopharyngeal swab sample collection.
4. In the substudy participants, self-collection of MT swabs and saliva samples by the participant.
5. Revision of symptom and safety daily data, discussion of inconsistencies with the participant.
6. Classification of severity of COVID-19 using WHO scale.
7. AEs will be assessed by the study staff.
8. If deemed necessary, AEs will be informed to and reviewed by the study physician, and medical attention will be given when necessary.

#### **7.1.6 Day 14**

The participant will be contacted by telephone by study staff for safety and clinical follow-up. Specifically,

1. Revision of symptom and safety daily data, and discussion of inconsistencies with the participant
2. Classification of severity of COVID-19 using WHO scale.
3. AEs will be assessed by the study staff.
4. If deemed necessary, AEs will be informed to and reviewed by the study physician, and medical attention will be given when necessary.

### **7.1.7 Day 28**

The participant will be scheduled a visit with a study nurse at the hospital, where the following procedures will be performed:

1. Vital signs (Temperature, Oxygen saturation, Respiratory rate, Heart rate, Blood pressure).
2. Nasopharyngeal swab sample collection.
3. Classification of severity of COVID-19 using WHO scale.
4. Assessment of COVID-19 symptoms that were still persisting at day 14 (as collected in the symptom diary) will be assessed as “persisting” or “resolved”.
5. AEs will be assessed by the study staff.
6. AEs will be informed to and reviewed by the study physician, and medical attention will be given when necessary.

### **7.1.8 Day 60 (End-of-Study)**

The participant will be contacted by telephone by study staff for safety and clinical follow-up. Specifically,

1. Classification of severity of COVID-19 using WHO scale.
2. In the substudy participants, a visit will be scheduled within 5 days to obtain a blood sample.

### **7.1.9 Extra home visit (unscheduled visit)**

The need of an extra home visit will be assessed by phone in case of:

- Report of any new symptom with grade 4 at the FLU-PRO<sup>®</sup> PLUS questionnaire
- Report of any AE of grade 3 or more

If deemed necessary by the study staff, at any time during the study period, the participant will be visited at home to perform the necessary procedures to assess an AE or provide medical attention.

### **7.1.10 Participant's Diary**

Additionally to the scheduled study visits, the participant will perform the following procedures daily from day 1 to day 14:

1. Measurement of axillary body temperature
2. Fill the symptom and safety diary card, which will include the FLU-PRO<sup>®</sup> PLUS Questionnaire and additional questions regarding safety, and medications taken by the participant.

Data will be collected using an electronic case report form (eCRF). Paper forms will be available for those participants who are unable to submit data using eCRF, and in this scenario data will be collected at follow-up visit on day 7 and by a study courier on day 15.

## **7.2 Clinical Progression Scales**

The following scales will be used to assess clinical progression of the participants:

### **7.2.1 WHO Clinical Progression Scale**

This scale will be assessed by the study staff at baseline, and days 3, 7, 14, 28, and 60.

The WHO Clinical Progression Scale is recommended for non-mortal clinical outcomes (WHO Working Group on the Clinical Characterisation and Management of COVID-19 infection, 2020) (15), and will assess hospitalization rate (i.e., who reach a score  $\geq 4$ ).

This is an ordinal scale to measure clinical progression and recovery based on location and supportive measures used within the health-care system. It provides a measure of illness severity across a range from 0 (not infected) to 10 (death) with data elements that are rapidly obtainable from clinical records.

The WHO Clinical Progression Scale is located in **ANNEX 2**.

### **7.2.2 FLU-PRO® PLUS Questionnaire**

Participants will fill daily questionnaires from baseline to day 14. Data will be self-reported, collected using the study eCRF and reviewed by the investigator at baseline, and days 3, 7, and 14.

Symptom severity will be also assessed with the certified-Spanish translation of the FLU-PRO® PLUS Questionnaire. It is a COVID-19 daily self-score tool, to assess severity of symptoms across six body systems: nose, throat, eyes, chest/respiratory, gastrointestinal, and body/systemic.

The instrument also provides data on the presence/absence of symptoms, symptom profiles, and change over time.

Adapted from the FLU-PRO® instrument, the COVID version consists of 34 items that are answered daily. Items 1-27 are Likert scale questions (rated 0-4) where 0 = not at all and 4 = very much. These items are summed to score the severity of symptoms- where a total score of 112 would indicate the greatest severity of symptoms and a score of 0 would indicate no severity of symptoms. Items 28-32 are also Likert scale questions (rated 0-4) that measure the frequency of specific daily symptoms where 0 = never or 0 times and 4 = always or 4 times. These items are summed to score the frequency of symptoms, where the highest score for the frequency of symptoms (20) indicates the greatest burden of symptom frequency. Items 33 and 34 are yes/no questions that measure the presence/absence of COVID-19 specific symptoms, where 0 = no and 1 = yes. These items are summed, where the highest score of 2 indicates presence of both symptoms. The total maximum score of the FLU-PRO® PLUS questionnaire is 134.

The FLU-PRO® PLUS Questionnaire is located in **ANNEX 3**. For the present study.

### **7.2.3 Assessment of Safety**

Safety will be assessed using the safety diary card filled daily by participants and through telephone contact by study staff on day 3, 7 and 14. Safety diary card and phone assessments are detailed in **ANNEX 4**.

Participants will fill daily from baseline to day 14 self-reported data related to symptoms and safety. These data will include medication-related effects with directed questioning on the most common adverse effects and an open-ended free-text field.

The investigator team will review surveys on days 3, 7, and 14, to assess compliance in self-reporting data and safety data will be also collected, with direct questioning on common AEs and indirect questioning on other possible AEs.

If the participant reports any new symptom with grade 4 at the FLU-PRO® PLUS questionnaire or any AE of grade 3 or more, he or she will be contacted by telephone by the study staff to evaluate the need of an extra home visit. The need of an extra home visit will be evaluated if an important AE is detected on the phone visits.

Participants will be also given a contact number to report AEs, to seek medical advice, and resolve any question related to the study.

For participants who would not respond to follow-up surveys, investigators will use e-mails or telephone calls to ascertain outcomes from them.

### 7.3 Description of Laboratory Tests and Procedures

| Test                                                                   | Type of sample                                                                    | Description                                                                                                    | Location                                         | Visit                        |
|------------------------------------------------------------------------|-----------------------------------------------------------------------------------|----------------------------------------------------------------------------------------------------------------|--------------------------------------------------|------------------------------|
| Inflammatory prognostic markers                                        | Blood sample                                                                      | White cell blood count , ferritin, prealbumin, interleukin 6 (IL-6), D-dimer, C reactive protein (CRP)         | Central Laboratory of each study site            | Baseline* and day 7          |
| ABO compatibility test                                                 | Blood sample                                                                      | Type of anti-A and anti-B in red cells and in serum only in participants assigned to convalescent plasma group | BST or Haematology Department of each study site | Baseline*                    |
| Quantitative measurement of SARS-CoV-2 viral load                      | Nasopharyngeal swab                                                               | Quantitative RT-PCR of SARS-CoV-2                                                                              | Clinical genetics Service of the HUGTiP          | Baseline*, days 7 and 28     |
| Quantitative measurement of SARS-CoV-2 viral load                      | Self-collected MT swab and self-collected saliva                                  | Quantitative RT-PCR of SARS-CoV-2 ( <u>substudy</u> )                                                          | Clinical genetics Service of the HUGTiP          | Baseline* and day 7          |
| Quantitative measurement of neutralizing antibodies against SARS-CoV-2 | Convalescent anti-SARS-CoV-2 MBT plasma infused                                   | Quantitative measurement of neutralizing antibodies against SARS-CoV-2                                         | IrsiCaixa                                        | Baseline                     |
| Quantitative measurement of neutralizing antibodies against SARS-CoV-2 | Blood sample                                                                      | Quantitative measurement of neutralizing antibodies against SARS-CoV-2 ( <u>substudy</u> )                     | IrsiCaixa                                        | Baseline*, day 7 and 60      |
| Storage                                                                | Plasma                                                                            | Future investigations.                                                                                         | IrsiCaixa and ISGlobal                           | Baseline*                    |
|                                                                        | Leftovers of SARS-CoV-2 positive nasopharyngeal swab                              | Future investigations.                                                                                         | Clinical genetics Service of the HUGTiP          | Baseline* and days 7, and 28 |
|                                                                        | Leftovers of SARS-CoV-2 positive self-collected MT swab and self-collected saliva | Future investigations.                                                                                         | Clinical genetics Service of the HUGTiP          | Baseline* and day 7.         |

*\*All baseline samples will be obtained before start of infusion of investigational product.*

## 7.4 Study Variables

Among others, the following study variables will be collected:

Demographic data:

1. Age
2. Sex (Male/Female)

Clinical data:

1. Comorbidities
  - a. Chronic obstructive pulmonary disease
  - b. Asthma
  - c. Chronic hypertension
  - d. Obesity
  - e. Cardiovascular disease (Chronic congestive cardiac failure, ischemic heart disease)
  - f. Chronic kidney disease
  - g. Diabetes
  - h. Cerebrovascular disease
  - i. Cancer
  - j. Immunosuppression
2. Concomitant treatments

COVID-19 clinical data:

4. Date of positive SARS-CoV-2 result
5. Type of test:
  - a. RT-PCR
  - b. Validated antigen rapid diagnostic test
6. Date of symptom onset
7. COVID-19 severity (mild, moderate, severe or critical)

Participant diary card, list of symptoms (extracted from the FLU-PRO<sup>®</sup> PLUS Questionnaire, **ANNEX 3**):

1. Fever
  - a. Felt cold
  - b. Felt hot
  - c. Sweating
2. Cough
  - a. Dry or hacking cough
  - b. Wet or loose cough
  - c. Frequency of coughing
  - d. Frequency of coughing up mucus or phlegm
3. Sore throat
  - a. Scratchy or itchy throat
  - b. Sore or painful throat





- c. Difficulty swallowing
- 4. Malaise
  - a. Lack of appetite
  - b. Sleeping more than usual
  - c. Weak or tired
  - d. Chills or shivering
- 5. Headache
  - a. Felt dizzy
  - b. Head congestion
  - c. Headache
- 6. Muscle pain
  - a. Body aches or pains
- 7. Shortness of breath, dyspnoea
  - a. Trouble breathing
  - b. Chest congestion
  - c. Chest tightness
- 8. Gastrointestinal symptoms
  - a. Felt nauseous
  - b. Stomach ache
  - c. Frequency of vomiting
  - d. Frequency of diarrhoea
- 9. Anosmia
- 10. Ageusia
- 11. Rhinitis
  - a. Runny or dripping nose
  - b. Congested or stuffy nose
  - c. Sinus pressure
  - d. Frequency of sneezing
- 12. Conjunctivitis
  - a. Teary or watery eyes
  - b. Sore or painful eyes
  - c. Eyes sensitive to light

Participant diary card, safety:

- 1. Injection site pain
- 2. Injection site swelling
- 3. Rash
- 4. Injection site pruritus

Physical examination and vital signs:

- 1. Saturation of oxygen on room air at sea level
- 2. Blood pressure
- 3. Temperature
- 4. Respiratory rate
- 5. Heart rate



6. Weight measurement
7. Height measurement

Convalescent anti-SARS-CoV-2 MBT plasma analysis:

1. Titers of anti-SARS-CoV-2 antibodies in donor's MBT plasma

Blood analysis:

1. Complete Blood Count (lymphocytes, leucocyte count)
2. Ferritin
3. Prealbumin
4. Interleukin 6 (IL-6)
5. D-dimer
6. C-reactive Protein (CRP)
7. Titers of anti-SARS-CoV-2 antibodies

Respiratory swabs (nasopharyngeal and MT) and saliva analysis:

1. SARS-CoV-2 RT-qPCR

Hospitalization

1. Date of hospitalization
2. Cause
3. Notification and collection of data as defined in section 8

Death

1. Date
2. Cause

Radiological findings (if available)

1. Chest CT scan
2. Chest x-ray

Adverse events

1. As defined in section 8

Concomitant treatments

1. As defined in section 5.6

## 7.5 Schedule of Procedures

|                                                      | Screening (phone) <sup>6</sup> | Inclusion/Baseline (hospital setting visit) <sup>7</sup> | Day 3 (phone) | Day 7 (home/hospital) | Day 14 (phone) | Day 28 (hospital) | Day 60 (phone) |
|------------------------------------------------------|--------------------------------|----------------------------------------------------------|---------------|-----------------------|----------------|-------------------|----------------|
| Allowable window (days)                              | N/A                            | 0                                                        | + 2           | +/-2                  | +/-2           | +/- 2             | +/- 2          |
| Authorization to access medical records <sup>1</sup> | X                              |                                                          |               |                       |                |                   |                |
| Informed consent signature                           |                                | X                                                        |               |                       |                |                   |                |
| Pregnancy test                                       |                                | X                                                        |               |                       |                |                   |                |
| Clinical examination                                 |                                | X                                                        |               |                       |                |                   |                |
| Vital signs                                          |                                | X                                                        |               | X                     |                | X                 |                |
| Demographic, clinical data, and PCR record           |                                | X                                                        |               |                       |                |                   |                |
| Inclusion / exclusion criteria                       | X                              | X                                                        |               |                       |                |                   |                |
| Nasopharyngeal swab                                  |                                | X <sup>2</sup>                                           |               | X                     |                | X                 |                |
| MT swabs (self-collection)                           |                                | X <sup>2,3</sup>                                         |               | X <sup>3</sup>        |                |                   |                |
| Saliva sample (self-collection)                      |                                | X <sup>2,3</sup>                                         |               | X <sup>3</sup>        |                |                   |                |
| Blood draw                                           |                                | X <sup>2</sup>                                           |               | X                     |                |                   | X <sup>3</sup> |
| ABO compatibility test                               |                                | X <sup>2,4</sup>                                         |               |                       |                |                   |                |
| Inflammatory prognostic markers                      |                                | X <sup>2</sup>                                           |               | X                     |                |                   |                |
| Neutralizing antibodies                              |                                | X <sup>2,3</sup>                                         |               | X <sup>3</sup>        |                |                   | X <sup>3</sup> |
| Sample storage                                       |                                | X <sup>2</sup>                                           |               | X                     |                |                   | X <sup>3</sup> |
| Investigational product infusion                     |                                | X                                                        |               |                       |                |                   |                |
| Symptom and safety diary card training               |                                | X                                                        |               |                       |                |                   |                |
| Adverse events                                       |                                | X                                                        |               |                       |                | X                 | X <sup>5</sup> |
| Symptom and safety diary card                        |                                | X                                                        |               |                       | X              |                   |                |
| Symptom persistency or resolution                    |                                |                                                          |               |                       |                | X                 |                |
| Follow up assessment                                 |                                | X                                                        |               |                       |                | X                 |                |
| Concomitant Treatment                                |                                | X                                                        |               |                       |                | X                 |                |

MT: mid-turbinate; N/A: Not applicable

<sup>1</sup> In order to minimize the transfers of COVID-19 patients, given the risk of contagion that this would entail, eligibility will be assessed based on the revision of regional shared medical records (Història Clínica Compartida de Catalunya HC3), and clinical history taken by phone.

<sup>2</sup> Samples at baseline will be obtained prior to the infusion of the investigational product.<sup>3</sup> Substudy in a subgroup of 135 participants. Day 60 blood draw allowable window will be +5 days from the actual day of the day 60 visit.

<sup>4</sup> Blood for the ABO compatibility test will be collected from all study participants, but the test will only be performed in experimental (convalescent plasma) group.

<sup>5</sup> The time frame for new AE collection will end at day 28 visit. At day 60 visit, the investigator must collect follow-up data of AEs that were not resolved on day 28, and SAEs due to hospitalization or death.



<sup>6</sup> The screening remote visit will only be performed in participants registered on the study website.

<sup>7</sup> A visit at home by the Hospital at home care unit staff will be allowed if safe requirements detailed on the study SOPs are met.

## 8 **ADVERSE EVENTS AND INCIDENTS**

### 8.1 **Safety parameters**

The safety endpoints will include:

1. Cumulative incidence of adverse events (AEs) through day 28
2. Cumulative incidence of serious adverse events (SAEs) through day 28
3. Cumulative incidence of severe AEs through day 28

In this study, disease progression is defined as the worsening of a subject's condition attributable to the disease for which the investigational product is being studied. It may be an increase in the severity of the targeted disease and/or increases in the symptoms of the targeted disease. Anticipated symptoms of COVID-19 include fever, cough, hypoxia, dyspnoea, haemoptysis, myalgia, fatigue, pharyngitis, diarrhoea which may develop at any time during the course of the disease.

### 8.2 **Definitions**

**Adverse event (AE)**: Medical event presented by a participant administered an investigational product, and which does not necessarily have a causal relation to the treatment.

**Serious adverse event (SAE)**: Medical event classified as such and which, regardless of the dose involved:

1. Causes participant death.
2. Produces a life-threatening situation for the participant.
3. Requires or prolongs in hospital admission.
4. Produces important or persistent incapacitation/handicap or constitutes a congenital defect or anomaly.
5. Needs action to prevent any of above situations.
6. Is considered medically significant (examples of such events are intensive care in an Emergency Service or at home in a patient with allergic bronchospasm; blood dyscrasias or seizures not giving rise to hospital admission, or the development of drug dependency or abuse).

**Unexpected adverse event (UAE)**: AE related to the investigational product the nature or intensity of which does not coincide with the information available on the product.

**Suspected Unexpected Serious Adverse Reaction (SUSAR)**: SAE related to the investigational product the nature or intensity of which does not coincide with the information available on the product.

#### **Incident related to the infusion:**

- **Mistake in component infusion**: event in which a participant is administered an investigational product that is non-compliant or was intended for another participant.
- **Incident without effect or almost-incident**: event in which a mistake in component infusion is detected before happening.

## 8.3 Adverse Events Assessment

### 8.3.1 Seriousness

A serious AE is any medical event that meets the criteria of SAE.

Events not considered to be SAEs are hospitalizations for:

1. A standard procedure for protocol therapy administration. However, hospitalization or prolonged hospitalization for a complication of therapy administration will be reported as an SAE.
2. Routine treatment or monitoring of the studied indication not associated with any deterioration in condition.
3. A procedure for protocol/disease-related investigations (e.g., surgery, scans, endoscopy, sampling for laboratory tests, bone marrow sampling). However, hospitalization or prolonged hospitalization for a complication of such procedures remains a reportable SAE.
4. Hospitalization or prolongation of hospitalization for technical, practical, or social reasons, in absence of an AE.
5. A procedure that is planned (i.e., planned prior to starting of treatment on study); must be documented in the source document and the CRF. Hospitalization or prolonged hospitalization for a complication remains a reportable SAE.
6. An elective treatment of a pre-existing condition unrelated to the studied indication.
7. Emergency out participant treatment or observation that does not result in admission, unless fulfilling other seriousness criteria above.

### 8.3.2 Intensity

The FDA *Toxicity Grading Scale for Healthy Adult and Adolescent Volunteers* scale will be used to grade the intensity of the AE. Events not listed in the grading scale will be graded as follows:

|         |                                                                               |
|---------|-------------------------------------------------------------------------------|
| Grade 1 | Mild. No interference with activity.                                          |
| Grade 2 | Moderate. Some interference with activity not requiring medical intervention. |
| Grade 3 | Severe. Prevents daily activity and requires medical intervention.            |
| Grade 4 | Potentially Life Threatening. Emergency Room visit or hospitalization.        |
| Grade 5 | Death.                                                                        |

### 8.3.3 Causality

All AEs must have their relationship to the investigational product assessed by the physician who examines/contacts and evaluates the participant based on temporal relationship and his/her clinical judgment. Causal relationship to the investigational product will be established according to medical judgment on whether there is a reasonable possibility of a causal relationship between the AE and the investigational product administration.

The investigator must determine and classify the AE causality according to the following categories:

- Unrelated/Not related: There is not a reasonable possibility that the administration of the investigational product caused the AE, there is no temporal relationship between the investigational product administration and AE onset, or an alternate aetiology has been established.

- Related: The AE is known to occur with the investigational product, there is a reasonable possibility that the investigational product caused the AE, or there is a temporal relationship between the investigational product administration and the AE. Reasonable possibility means that there is evidence to suggest a causal relationship between the investigational product administration and the AE.
  - Possibly related: There is evidence to suggest a causal relationship between the investigational product and the AE.
  - Definitely related: There is a reason to conclude that the investigational product caused the AE.

Criteria to assess the causal relationship should take in account of the following conditions.

1. A plausible temporal sequence from the investigational product administration to the AE onset.
2. Whether the AE follows a known response pattern to the suspected treatment.
3. Whether the AE could be reasonable explained by the participant's clinical state, comorbidities, or concomitant medications.
4. The occurrence of improvement on stopping/reducing the treatment (positive dechallenge) and/or reappearance of the AE on repeated exposure (positive rechallenge).

#### **8.3.4 Expectedness**

An AE related to the investigational product will be considered “unexpected” if the nature, seriousness, severity, or outcome of the reaction(s) is not consistent with the reference information or expected effects of fresh frozen plasma infusion.

The assessment of the expectedness between an AE and the administration of treatment is a decision to be made by the principal investigator or co-investigator, who are qualified physicians.

A suspected unexpected serious adverse reaction (SUSAR) is a serious adverse event related to the investigational product whose nature, severity or outcome is not consistent with the reference information or expected effects of the fresh frozen plasma infusion.

All unexpected serious ARs will be notified to the study sponsor.

#### **8.3.5 Duration**

For both AEs and SAEs, the investigator will provide a record of start and stop dates of the event (expressed in the shortest time unit possible). Changes in the severity of an AE or SAE will be documented in the clinical record.

For AEs that occur during the infusion, the infusion rate in effect at the time of onset of the AE, the time of onset of the AE and the time of AE change materially in intensity and/or resolve will be captured.

#### **8.3.6 Action Taken**

The investigator will report the action taken with study intervention as a result of an AE or SAE, as applicable (i.e., discontinuation or reduction of volume of infusion, as appropriate) and report whether concomitant and/or additional treatments were given for the event.

#### **8.3.7 Outcome**

Any AE or SAE will be followed preferably until:

- Resolution of the event.

- Stabilization of the event
- Resetting the baseline situation of the event, in case baseline situation is available.

Otherwise, they will continue until:

- The event can be attributed to products other than the investigational product or factors unrelated to the study; or
- It is unlikely to obtain further information.

If the subject dies from a SAE, the rest of AE or SAE that are active will be recorded as “not recovered”.

#### **8.4 Time Frame for Recording Adverse Events and Incidents**

The investigator must collect all the AE, SAE and incidences that occur from the moment the subject signs the informed consent until day 28. On day 60, the investigator must collect follow-up data of AEs that were not resolved on day 28, and SAEs due to hospitalization or death.

#### **8.5 Documentation Related to Adverse Events and Incidents**

Each AE, SAE or incident to take place during the study will be documented in the medical records of the participant in accordance with standard clinical practice of the investigator. For each SAE, an independent set of SAE form will be used. Only if there are multiple SAE at the time of the initial report and these are temporary and / or clinically interrelated can be registered on the same set of SAE form.

The investigator should try to make a diagnosis of the event based on the signs, symptoms and / or other clinical information. An AE diagnosis must be recorded per line, or a sign/symptom if the diagnosis is not available. If a diagnosis subsequently becomes available, this then should be entered, and the sign/symptom crossed out.

SAE pages found in the investigator’s file shall be completed as precisely as possible and shall be signed by the investigator before being sent to sponsor. In the initial page of the SAE form, the investigator must provide his/her opinion regarding the relationship of the event to the study intervention.

#### **8.6 Pregnancy**

Cases of pregnancy will be recorded as AE and should only be considered as SAE only if they meet any seriousness criteria. Pregnancy will also be a protocol deviation. The investigator will provide the necessary medical advice to the pregnant participant.

No special measures are required in relation to the pregnancy of a partner of a male participant.

#### **8.7 Procedure for Adverse Event Reporting**

##### **8.7.1 Investigator**

The recording of AEs, SAEs and incidences is the responsibility of the study investigator team, which should indicate the time of appearance of the event (expressed in the shortest time unit possible), its serious / not serious status, and in case it is considered related to investigational products, whether it was expected or unexpected. The intensity of the event (grade 1 to 5) is to be specified, along with the measures adopted (none, treatment, temporal or permanent discontinuation of investigational product), course (complete remission, partial remission, persistence) and causality based on the criteria indicated in section 8.3.3.



All AEs, SAEs and incidences will be recorded, regardless of the causality or outcome, in the corresponding form of the eCRF of each participant. Depending on the nature of the event, each AE will be classified as:

- Serious / non-serious
- Related expected / related unexpected

The investigator will immediately notify the study sponsor of any SAE, any related AE, or any incidence. The notification will be performed within 24 hours of first knowledge by the investigator.

**Contact Details for Sponsor:**

[safety@fls-rs.com](mailto:safety@fls-rs.com)

**8.7.2 Sponsor**

The sponsor will inform the relevant Ethics Committee about any important information of security of the investigational product.

The sponsor will inform the relevant Ethics Committee of any SUSAR which may be related to the investigational product.

The deadlines to notify a SUSAR is, from the first knowledge by the sponsor:

1. 15 days
2. 7 days if the SUSAR has resolved in death or has been life-threatening. Relevant follow-up information for these cases will be subsequently submitted within an additional 8 days.

The sponsor will inform the hemovigilance service of any AE, or any incidence related to the infusion.

The sponsor will keep a detailed register of all the AEs and SAEs notified by the investigators and all AEs, SAEs and incidents will be listed in table form in the final report of the study.

**8.8 Data and Safety Monitoring Board**

An independent Data and Safety Monitoring Board (DSMB) has been convened to assess the progress of this clinical study, the safety data, and critical efficacy endpoints and provide recommendations to the study PI. The members of the DSMB serve in an individual capacity and provide their expertise and recommendations. The DSMB will review cumulative study data to evaluate safety, efficacy, study conduct, and scientific validity and data integrity of the study.

The composition, responsibilities and independence of the DSMB, as well as the planned meetings and communication flow, will be detailed in **ANNEX 7**.



## 9 STATISTICAL ANALYSIS

### 9.1 **Methods**

#### **9.1.1 Descriptive Analysis**

The characteristics of the study population will be described using frequencies for categorical variables and using mean and standard deviation for quantitative variables.

#### **9.1.2 Bivariate Analysis**

We will use the chi-square test for categorical variables and the t-test and analysis of variance for continuous variables.

#### **9.1.3 Multivariate Analysis**

##### Event rate comparison between groups

Hospitalization and/or death rate between groups will be analysed using the odds-ratio (OR) obtained by fitting a logistic regression model.

##### Longitudinal VL decay

Efficacy will be determined by comparing the mean reduction of the viral load from baseline to days 7 and 28, with the use of a linear/non-linear mixed effect model taking into account the randomization group and repeated measures within each individual. The viral load will be provided in logarithmic scale; if less than 15% of specimens presents undetectable viral load at a given follow-up assessment a value of 3 log<sub>10</sub> copies per mL (i.e., lower limit of detection) will be assigned for the purpose of statistical analysis. Otherwise, we will consider undetectable viral loads as left-censored values.

##### Mean change differences between groups

The secondary clinical outcome regarding between-group differences in symptoms severity score will be assessed by means of linear regression.

##### Time to event analysis

The time to complete resolution of symptoms will be analysed using Kaplan-Meier survival functions and hazard ratios (HRs), calculated using a Cox proportional hazards regression model based on the assumptions of proportional risks. Kaplan-Meier estimates will be compared using the log-rank test.

##### Variable selection

All models will be adjusted with basal covariates chosen according to their clinical relevance or from the observed correlation with the study outcome, and variable selection procedure will be done using the AIC-based stepwise algorithm.

##### Missing data and outliers

No missing data imputation method will be used in this study and we will not analyse the presence of potential outliers.

All analyses will be done with the R statistical package, version 6.3 or higher under a significance level of 0.05.

### 9.2 **Analysis Population**

The primary efficacy analysis will be performed on the intention-to-treat (ITT) population, which will include all randomized participants. If deemed necessary, sensitivity analyses will be performed with



the per-protocol (PP) population. Safety will be assessed in the safety population, which will include all participants who received investigational product (convalescent plasma or placebo).

### **9.3 Sample Size**

A sample size of 237 cases per arm would provide the trial with 80% power to detect 50% reduction in hospitalization rate at day 28 after starting the treatment, assuming an expected rate of hospitalization of 15%, allowing a 5% of loss to follow-up.

Approximately 157 cases per arm are required to have 80% power to detect a minimal expected difference of 5 points in a scale of 156 points with 39 items, to assess symptoms' severity, at a significance level of  $\alpha = 0.05$ , assuming a standard deviation of 15.

Approximately 150 cases per arm are required to have 80% power to detect a difference of 0.5 log<sub>10</sub> in the mean reduction of SARS-CoV-2 viral load at a two-sided significance level of  $\alpha = 0.05$ , assuming an expected overall standard deviation of 1.5. A 0.5 log<sub>10</sub> copies/mL difference in reduction was chosen to represent the minimal threshold for a biologically relevant change for our analyses.

For the substudy for quantification of neutralizing antibodies against SARS-CoV-2 a total sample size of 135 was estimated considering parameters detailed in the rationale.

### **9.4 Interim Analyses**

An interim analysis of efficacy and safety variables will be performed after the first 60 participants achieve the primary endpoint (i.e., day 28) for the purpose of sample size recalculation. The interim analyses will be performed using blinded data, unless otherwise indicated by the DSMB.

### **9.5 Deviation of Statistical Plan**

Any deviation from that presented statistical plan will be described and justified in the final study report.

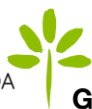

## **10 DIRECT ACCESS TO SOURCE DATA/DOCUMENTS**

Investigators and institutions will allow the monitoring, and audits by the sponsor giving direct access to data and original source documents.

Access to personal participant information will be restricted to the study investigator and staff. To allow monitoring, audits and inspections, access to data to the Ethics Committee and personnel authorized by the sponsor, is guaranteed while maintaining the confidentiality thereof according to current legislation, in accordance with the Data Protection Law (LOPD, the organic Law 3/2018 of 5 December on the Protection of Personal Data and the Guarantee of Digital Rights complementary to the Regulation (EU) 2016/679 of the European Parliament and of the Council of 27 April 2016, on the protection of natural persons with regard to the processing of personal data and on the free movement of such data).

The principal investigator will have overall control of, and will act as the custodian for all data for the full duration of the study.

## **11 QUALITY CONTROL AND QUALITY ASSURANCE**

### **11.1 Study Monitoring**

In accordance with applicable regulations and Good Clinical Practice (GCP), monitoring visits will be performed during the study.

Risk-adjusted monitoring will be carried out since the study is performed in a clinical care practice setting, with follow-up of the subjects treated in the community or primary care setting.

The goal of the monitoring activity is to verify that:

- the rights and welfare of the participants are respected;
- data collected are accurate, complete and verifiable with the help of original documents;
- the study is performed according to the protocol and any amendment adopted, GCPs and regulations.

The investigator must agree to:

- grant to monitor direct access to all relevant documentation;
- devote part of his/her time and staff time to the monitor in order to discuss the results of the monitoring, as well as any other possible aspect.

Data monitoring tasks will be set up in the Monitoring Plan, in general:

1. Verification of the study master file (approvals, protocol, investigational product information and other essential documents, pursuant to section 8 of ICH Guide E6).
2. Verification of signature of informed consent.
3. Check of dates of visit and source data verification.
4. Detection of inconsistencies in the eCRF by review of data in the medical records.

### **11.2 Protocol Deviations**

Major or critical deviations (i.e., that may have an impact on participant safety and data integrity) will be notified immediately to the sponsor. The sponsor will review all deviations from the protocol and assess whether any represents a serious breach of GCP and requires that the Ethics Committee be informed about it. The sponsor should report, when necessary, to the Ethics Committee any serious breach of current legislation or of the version of the protocol approved at the time of the breach that has occurred in Spain without delay and not later than 7 calendar days from becoming aware of the breach.

### **11.3 Audits and Inspections**

The sponsor can carry out an audit of quality control at its sole discretion. In this case, the investigator should agree to grant the auditor direct access to all relevant documentation and devote part of his/her time and staff time to the auditor in order to discuss the results of the monitoring, as well as any other possible aspect.

Regulatory authorities may also inspect the study. In this case, the investigator should agree to give the inspector direct access to all relevant documentation and devote part of his/her time and staff time to the inspector in order to discuss the results of the supervision, as well as any other possible aspect.

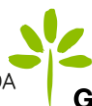

#### **11.4 Data Collection (electronic Case Report Form, eCRF)**

Collection of data will be performed using an electronic Case Report Form (eCRF), which will include track changes monitoring (i.e., recording the changes made and details of the user that made these changes). The eCRF will be filled by blinded investigators with a personal system of access by username and password. Participants will also be given access to the eCRF to directly fill the study questionnaires, which will be reviewed by the study investigators.

The eCRF will be developed by BioClever 2005 S.L.U., after proper agreement with the sponsor.

Electronic devices will be used to collect the study data during home visits and telephone visits.

Paper questionnaires will be made available to participants without access to electronic devices or difficulties to use them, and they will also be available in case of connection problems. Data of paper questionnaires will be filled by participants and study staff will introduce it to the eCRF. Data collected will be reviewed by the investigator in the follow-up visits and collection of paper forms will be performed at day 7 by study staff and at day 15 by study staff or courier. The paper source will be verified by the study monitor.

#### **11.5 Data Management**

A data management system will be set up and procedures will be implemented to warrant homogenization, traceability, and data quality. Data will be entered in a study-specific eCRF. Quality control procedures will be put in place for data checking. Rigorous consistency checks will be created in order to reduce errors during data entry.

Data management will be performed by BioClever 2005 S.L.U., after proper agreement with the sponsor.

Different identification sources will be involved in the study, and candidates will volunteer in a study website that will collect candidate name, surname, address and contact information. These data will be centralized in order to avoid informal personal data transfers between the different services involved, and will only be accessible to the investigators and study staff for the purposes of identification and contact. These data will be separated from the study eCRF.

In the study eCRF data will be collected and stored in a dissociated manner, without including any personal data. This database will be accessible to the sponsor, the data management team, the investigators, the study staff with data entry privileges and the participants. Participants will only be granted access to their own symptoms and safety diary card. The tools used to identify individuals may have individual identifiers, but this information will only be associated with an identification number (i.e., participant ID). This information will uniquely identify participants and will be associated with the rest of the captured data for the study.

For data safety and audit trail purposes each person using any of the defined study databases will be required to define clear data access. Individual user/password codes will be available for each person with access privileges and different roles will be established for data entry and/or revision.

Data collected through the eCRF will be stored in a study database, that will be hosted at a secure data center with appropriate series of protocols to test and maintain network security, and to provide access management policies for network drives, databases and remote access.

Data management team and investigators will be the only ones to access the database. The backup of the data will be done on a timely basis. The final data for the analysis will be placed on the FLS server and will be anonymous; If information that could enable to identify individuals has to be stored, used

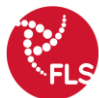

or shared, it will be encrypted. Consequently, those receiving the final data for analysis will not have access to any information that might help to physically identify individuals.



## 12 **ETHICS**

### 12.1 **General Considerations**

The clinical trial will be conducted according to the principles of the Declaration of Helsinki, Fortaleza, Brazil, October 2013.

This study will be conducted according to Spanish regulations regarding clinical studies without medicines (Orden SAS/3470/2009) and biomedical investigations (Law 14/2007 of biomedical investigation and the Royal Decree 1716/2011). The required documentation prior to the start will be:

- Protocol acceptance by the sponsor and the coordinating investigator
- Protocol approval by the Ethics Committee.

All participants will be guaranteed continued medical and nursing supervision throughout the duration of the study.

This study will conform to the standards of GCP published by ICH (E6 R2). Confidentiality requirements will follow the required Data Protection legislation (see section 13).

### 12.2 **Participant Information Sheet and Informed Consent**

The investigator will inform the candidates of the nature, duration, and purpose of this study and, in addition, of all the inconveniences and obstacles that, if any, can be expected. In addition, information will be provided to the participant. Subjects must have the legal capacity to give their consent and exercise their freedom of decision.

In order to minimize the transfers of COVID-19 patients, given the risk of contagion that this would entail, eligibility will be checked initially by phone before scheduling a hospital visit. An authorization from the candidates will be obtained over the phone to access their shared medical records (*Història Clínica Compartida de Catalunya HC3*) and check their suitability for the study. Candidates identified through the website will have authorized to obtain personal data and access to medical records when registering at the website. A confirmation e-mail including the study privacy policy will be sent.

During the inclusion/baseline visit, candidates will be informed in person of study details and the informed consent will be obtained (i.e., subjects will sign the informed consent form). The investigator will keep a call record of the informed consent process.

In the substudy participants, substudy informed consent will be obtained.

## **13 DATA HANDLING AND RECORD KEEPING**

### **13.1 Data Handling**

The processing of the data will be subject to current legislation as regards data protection (LOPD, The Organic Law 3/2018 of 5 December on the Protection of Personal Data and the Guarantee of Digital Rights complementary to the Regulation (EU) 2016/679 of the European Parliament and of the Council of 27 April 2016, on the protection of natural persons with regard to the processing of personal data and on the free movement of such data).

The responsible for the personal data registered will be the Delegado de Protección de Datos (DPD) in the Departamento de Salud (dpd@ticsalutsocial.cat). The responsible of the codified study data will be each of the centres involved in the study.

The eCRF and data management will be performed by BioClever 2005 S.L.U., after proper agreement with the sponsor, where the sponsor (FLS and HUGTiP) will be the data controller and BioClever 2005 S.L.U. will be data processor. Data servers will be located in Europe.

Data transmitted to third countries and other countries will in no case contain personal data. In the event that such transfer occurs, it will be for the same purposes of the study described and ensuring confidentiality at least to the level of protection of the law in Spain.

The participant will be identified in the records by the corresponding unique participant ID. The participant is to be guaranteed anonymity and is to be informed that all communication will take place between him/her and the investigator and not the sponsor of the study.

### **13.2 Record Keeping**

#### ***13.2.1 Investigator File and Document Retention***

The investigator must keep the investigator file with the proper and accurate records to enable the study to be fully documented and data subsequently verified.

The investigator's study file will contain the protocol and its amendments, CRFs, questionnaires' forms, EC approval samples of the patient information sheet and informed consent, staff curriculum, signatures' delegation log and listing of subjects, as well as other appropriate documents and correspondence.

Clinical source documents from subjects (usually predefined by the project to record key efficacy and safety parameters or documents that are not in the clinical record of the hospital) will be filed when necessary indicating the participant ID without personal data.

The investigator should retain these documents at least five years, provided that the sponsor does not express another period.

#### ***13.2.2 Source Documents and Basic Data***

Participation in the study will be included on the participant medical records, including assigned participant ID and identification of the different study visits that will take place throughout the study. At the end of the study, a copy of the eCRF will be placed on the site.





## **14 FINANCING AND INSURANCE**

### **14.1 Source of Financing**

The funding source is the Fundació FLS de Lluita contra la Sida, les Malalties Infeccioses i la Promoció de la Salut i La Ciència, Hospital Germans Trias i Pujol and Grifols.

### **14.2 Insurance Policy**

The study sponsor has a policy of liability insurance. The sponsor shall extend this policy or another with equivalent coverage until the end of the trial. This policy also covers the responsibilities of the sponsor, the principal and his/her collaborators, as well as the hospital or site where they carry out the study.

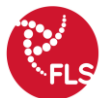

## **15 PUBLICATION POLICY**

The sponsor and the principal investigator aim to publish the results of this study in international peer reviewed journals.

## 16 REFERENCES

1. WHO Interim guidance 13 August 2020. [https://www.who.int/emergencies/diseases/novel-coronavirus-2019?gclid=CjwKCAjwydP5BRBREiwA-grCGrDAeovgOiCboUh2dKJhptzKhJd9TKha3iH1ZOiKAfe9nOkDggkXjxoC9rsQAvD\\_BwE](https://www.who.int/emergencies/diseases/novel-coronavirus-2019?gclid=CjwKCAjwydP5BRBREiwA-grCGrDAeovgOiCboUh2dKJhptzKhJd9TKha3iH1ZOiKAfe9nOkDggkXjxoC9rsQAvD_BwE)
2. Recommendations for Investigational COVID-19 Convalescent Plasma. US FDA. Published May 1, 2020. Accessed July 27th, 2020. <https://www.fda.gov/vaccines-blood-biologics/investigational-newdrug-ind-or-deviceexemption-ide-process-cber/recommendations-investigational-covid-19-convalescent-plasma>
3. Nguyen AA, Habiballah SB, Platt CD, Geha RS, Chou JS, McDonald DR. Immunoglobulins in the treatment of COVID-19 infection: Proceed with caution!. *Clin Immunol.* 2020;216:108459. doi:10.1016/j.clim.2020.108459
4. Li L, Zhang W, Hu Y, et al. Effect of Convalescent Plasma Therapy on Time to Clinical Improvement in Patients With Severe and Life-threatening COVID-19: A Randomized Clinical Trial [published online ahead of print, 2020 Jun 3]. *JAMA.* 2020;e2010044. doi:10.1001/jama.2020.10044
5. Liu, S. T.H., Lin, H.-M. et al. Convalescent plasma treatment of severe COVID-19: A marched control study. *MedRxiv*, 2020.05.20.20102236. <https://doi.org/10.1101/2020.05.20.20102236>
6. Joyner, M. J., Klassen, S. A., Senefeld, J., et al. Evidence favouring the efficacy of convalescent plasma for COVID-19 therapy. *MedRxiv*, 2020.07.29.20162917. <https://doi.org/10.1101/2020.07.29.20162917>
7. Tanne JH. Covid-19: FDA approves use of convalescent plasma to treat critically ill patients. *BMJ.* 2020;368:m1256. Published 2020 Mar 26. doi:10.1136/bmj.m1256.
8. Valk SJ, Piechotta V, Chai KL, et al. Convalescent plasma or hyperimmune immunoglobulin for people with COVID-19: a rapid review. *Cochrane Database Syst Rev.* 2020;5(5):CD013600. Published 2020 May 14. doi:10.1002/14651858.CD013600
9. Joyner MJ, Bruno KA, Klassen SA, et al. Safety Update: COVID-19 Convalescent Plasma in 20,000 Hospitalized Patients [published online ahead of print, 2020 Jul 19]. *Mayo Clin Proc.* 2020;doi:10.1016/j.mayocp.2020.06.028
10. COVID-19 treatment guidelines. NIH. <https://www.covid19treatmentguidelines.nih.gov/immune-based-therapy/>
11. Wan Y, Shang J, Sun S, et al. Molecular Mechanism for Antibody-Dependent Enhancement of Coronavirus Entry. *J Virol.* 2020;94(5):e02015-19. Published 2020 Feb 14. doi:10.1128/JVI.02015-19
12. Mair-Jenkins J, Saavedra-Campos M, Baillie JK, et al. The effectiveness of convalescent plasma and hyperimmune immunoglobulin for the treatment of severe acute respiratory infections of viral etiology: a systematic review and exploratory meta-analysis. *J Infect Dis.* 2015;211(1):80-90. doi:10.1093/infdis/jiu396
13. Casadevall A, Pirofski LA. The convalescent sera option for containing COVID-19. *J Clin Invest.* 2020;130(4):1545-1548. doi:10.1172/JCI138003
14. van Griensven J, Edwards T, Gallian P; Ebola-Tx Consortium. Convalescent Plasma for Ebola Virus Disease. *N Engl J Med.* 2016;374(25):2500. doi:10.1056/NEJMc1602284
15. WHO Working Group on the Clinical Characterisation and Management of COVID-19 infection. A minimal common outcome measure set for COVID-19 clinical research. *Lancet Infect Dis.* 2020;20(8):e192-e197. doi:10.1016/S1473-3099(20)30483-7

16. Pujadas E, Chaudhry F, McBride R, et al. SARS-CoV-2 Viral Load Predicts COVID-19 Mortality. *medRxiv* 2020.06.11.20128934; doi: <https://doi.org/10.1101/2020.06.11.20128934>
17. Han A, Poon JL, Powers JH 3rd, Leidy NK, Yu R, Memoli MJ. Using the Influenza Patient-reported Outcome (FLU-PRO) diary to evaluate symptoms of influenza viral infection in a healthy human challenge model. *BMC Infect Dis.* 2018;18(1):353. Published 2018 Jul 28. doi:10.1186/s12879-018-3220-8
18. Powers JH, Guerrero ML, Leidy NK, et al. Development of the Flu-PRO: a patient-reported outcome (PRO) instrument to evaluate symptoms of influenza. *BMC Infect Dis.* 2016;16:1. Published 2016 Jan 5. doi:10.1186/s12879-015-1330-0
19. Kermali, M., Khalsa, R. K., Pillai, K., Ismail, Z., & Harky, A. (2020). The role of biomarkers in diagnosis of COVID-19 – A systematic review. In *Life Sciences* (Vol. 254, Issue January, p. 117788). <https://doi.org/10.1016/j.lfs.2020.117788>
20. Pelegrin M, Naranjo-Gomez M, Piechaczyk M. Antiviral Monoclonal Antibodies: Can They Be More Than Simple Neutralizing Agents? *Trends Microbiol* 2015; 23:653–665.
21. Schoofs T, Klein F, Braunschweig M, Kreider EF, Feldmann A, Nogueira L, et al. HIV-1 therapy with monoclonal antibody 3BNC117 elicits host immune responses against HIV-1. *Science (80- )* 2016; 352:997–1001.
22. To KK, Tsang OT, Yip CC, et al. Consistent Detection of 2019 Novel Coronavirus in Saliva. *Clin Infect Dis.* 2020;71(15):841-843. doi:10.1093/cid/ciaa149
23. Tu YP, Jennings R, Hart B, et al. Swabs Collected by Patients or Health Care Workers for SARS-CoV-2 Testing. *N Engl J Med.* 2020;383(5):494-496. doi:10.1056/NEJMc2016321
24. McCulloch DJ, Kim AE, Wilcox NC, et al. Comparison of Unsupervised Home Self-collected Midnasal Swabs With Clinician-Collected Nasopharyngeal Swabs for Detection of SARS-CoV-2 Infection. *JAMA Netw Open.* 2020;3(7):e2016382. Published 2020 Jul 1. doi:10.1001/jamanetworkopen.2020.16382
25. Page AV, Liles WC: Biomarkers of endothelial activation/dysfunction in infectious diseases. *Virulence* 2013, 4(6):507-516. doi: 10.4161/viru.24530
26. Balanza N, Erice C, Ngai M, et al. Host-based prognostic biomarkers to improve risk stratification and outcome of febrile children in low- and middle-income countries. *Front Pediatr.* 2020; 8:552083. doi: 10.3389/fped.2020.552083
27. Richard-Greenblatt M, Boillat-Blanco N, Zhong K, et al. Prognostic accuracy of sTREM-1-based algorithms in febrile adults presenting to Tanzanian outpatient clinics. *Clin Infect Dis* 2019. Mar 17;70(7):1304-1312 doi: 10.1093/cid/ciz419
28. Conroy AL, Hawkes M, McDonald CR, et al. Host Biomarkers Are Associated With Response to Therapy and Long-Term Mortality in Pediatric Severe Malaria. *Open forum infectious diseases* 2016, 3(3):ofw134. doi: 10.1093/ofid/ofw134
29. Smadja DM, Guerin CL, Chocron R, et al. Angiopoietin-2 as a marker of endothelial activation is a good predictor factor for intensive care unit admission of COVID-19 patients. *Angiogenesis* 2020:1-10. doi: 10.1007/s10456-020-09730-0



## 17 ANNEXES

### **ANNEX 1: DONOR SELECTION, COLLECTION AND PROCESSING PROCEDURES FOR CONVALESCENT MBT PLASMA PREPARATION FROM DONORS RECOVERED FROM COVID-19**

#### **ANNEX 1.1.: CRITERIA FOR ACCEPTING / EXCLUDING DONORS OF WHOLE BLOOD AND BLOOD COMPONENTS**

Attached separately, corresponding to the document T-DI-EM-001 of the “Manual de Tècniques” of the BST.

#### **ANNEX 1.2: UPDATE OF THE PROTOCOL FOR THE SELECTION OF COVID-19 CONVALESCENT PLASMA DONORS**

Attached separately, corresponding to the document NT-DI-EM-011 of the “Comissió Transversal d’Hemodonació BST”.

#### **ANNEX 1.3.: REGISTER OF THE ASSESSMENT OF COVID-19 CONVALESCENT PLASMA DONOR**

Attached separately, corresponding to the BST register form.

#### **ANNEX 1.4.: CONVALESCENT LABEL TEMPLATE E9744**

Attached separately, corresponding to the E9744 BST label for MBT convalescent plasma.

#### **ANNEX 1.5.: METHYLENE BLUE INACTIVATION PROCESS**

Attached separately, corresponding to the document T-FR-015 of the “Manual de Tècniques” of the BST.

## ANNEX 2: WHO CLINICAL PROGRESSION SCALE

| Patient State                  | Descriptor                                                                             | Score |
|--------------------------------|----------------------------------------------------------------------------------------|-------|
| Uninfected                     | Uninfected; no viral RNA detected                                                      | 0     |
| Ambulatory mild disease        | Asymptomatic; viral RNA detected                                                       | 1     |
|                                | Symptomatic; independent                                                               | 2     |
|                                | Symptomatic; assistance needed                                                         | 3     |
| Hospitalised: moderate disease | Hospitalised; no oxygen therapy*                                                       | 4     |
|                                | Hospitalised; oxygen by mask or nasal prongs                                           | 5     |
| Hospitalised: severe diseases  | Hospitalised; oxygen by NIV or high flow                                               | 6     |
|                                | Intubation and mechanical ventilation, $pO_2/FiO_2 \geq 150$ or $SpO_2/FiO_2 \geq 200$ | 7     |
|                                | Mechanical ventilation $pO_2/FiO_2 < 150$ ( $SpO_2/FiO_2 < 200$ ) or vasopressors      | 8     |
|                                | Mechanical ventilation $pO_2/FiO_2 < 150$ and vasopressors, dialysis, or ECMO          | 9     |
| Dead                           | Dead                                                                                   | 10    |



### ANNEX 3: FLU-PRO® PLUS QUESTIONNAIRE

#### Marcar los síntomas actuales

Nos gustaría que nos informara sobre los síntomas que le han afectado en las últimas 24 horas.

Para cada síntoma, marque la casilla situada debajo de la respuesta que mejor describa su experiencia. Marque la casilla que dice "En absoluto", si no ha tenido ese síntoma en las últimas 24 horas

¿Qué hora es? \_\_\_\_\_  Mañana  Tarde  Noche

Indique en qué medida ha tenido cada síntoma en las últimas 24 horas.

|    |                                                          | En absoluto              | Un poco                  | Algo                     | Bastante                 | Muchísimo                |
|----|----------------------------------------------------------|--------------------------|--------------------------|--------------------------|--------------------------|--------------------------|
| 1  | Moqueo o goteo nasal                                     | <input type="checkbox"/> |
| 2  | Congestión nasal o nariz taponada                        | <input type="checkbox"/> |
| 3  | Presión sinusal                                          | <input type="checkbox"/> |
| 4  | Picor de garganta                                        | <input type="checkbox"/> |
| 5  | Molestias o dolor de garganta                            | <input type="checkbox"/> |
| 6  | Dificultad para tragar                                   | <input type="checkbox"/> |
| 7  | Ojos llorosos o acuosos                                  | <input type="checkbox"/> |
| 8  | Molestias o dolor de ojos                                | <input type="checkbox"/> |
| 9  | Ojos sensibles a la luz                                  | <input type="checkbox"/> |
| 10 | Dificultad para respirar                                 | <input type="checkbox"/> |
| 11 | Congestión en el pecho                                   | <input type="checkbox"/> |
| 12 | Opresión en el pecho                                     | <input type="checkbox"/> |
| 13 | Tos seca                                                 | <input type="checkbox"/> |
| 14 | Tos productiva o con flemas                              | <input type="checkbox"/> |
| 15 | Sintió náuseas (con la sensación de que quería devolver) | <input type="checkbox"/> |
| 16 | Dolor de estómago                                        | <input type="checkbox"/> |
| 17 | Se sintió mareado                                        | <input type="checkbox"/> |
| 18 | Congestión de cabeza                                     | <input type="checkbox"/> |

|    |                                  |                          |                          |                          |                          |                          |
|----|----------------------------------|--------------------------|--------------------------|--------------------------|--------------------------|--------------------------|
| 19 | Dolor de cabeza                  | <input type="checkbox"/> |
| 20 | Falta de apetito                 | <input type="checkbox"/> |
| 21 | Dormir más de lo habitual        | <input type="checkbox"/> |
| 22 | Dolores o molestias en el cuerpo | <input type="checkbox"/> |
| 23 | Débil o cansado                  | <input type="checkbox"/> |
| 24 | Escalofríos o tiritona           | <input type="checkbox"/> |
| 25 | Sintió frío                      | <input type="checkbox"/> |
| 26 | Sintió calor                     | <input type="checkbox"/> |
| 27 | Sudores                          | <input type="checkbox"/> |

\* En absoluto (0), Un poco (1), Algo (2), Bastante (3), Muchísimo (4). Si alguno de los síntomas es igual a Muchísimo (4) registrado por primera vez, COORDINACIÓN recibirá una alerta (por email) para evaluar mediante una visita telefónica la programación de una visita presencial (VISITA DOMICILIARIA EXTRA)

En las últimas **24 horas**, ¿con qué frecuencia ha tenido alguno de los síntomas siguientes?

|    |                      | Nunca                    | Rara vez                 | Algunas veces            | A menudo                 | Siempre                  |
|----|----------------------|--------------------------|--------------------------|--------------------------|--------------------------|--------------------------|
| 28 | Estornudos           | <input type="checkbox"/> |
| 29 | Tos                  | <input type="checkbox"/> |
| 30 | Tosió mocos o flemas | <input type="checkbox"/> |

\*Nunca (0), Rara vez (1), Algunas veces (2), A menudo (3), Siempre (4). Si alguno de los síntomas es igual a Siempre (4) registrado por primera vez, COORDINACIÓN recibirá una alerta (por email) para evaluar mediante una visita telefónica la programación de una visita presencial (VISITA DOMICILIARIA EXTRA)

|    |                                   | 0 veces                  | 1 vez                    | 2 veces                  | 3 veces                  | 4 o más veces            |
|----|-----------------------------------|--------------------------|--------------------------|--------------------------|--------------------------|--------------------------|
| 31 | ¿Cuántas veces ha vomitado?       | <input type="checkbox"/> |
| 32 | ¿Cuántas veces ha tenido diarrea? | <input type="checkbox"/> |

En las últimas **24h**, ¿ha tenido alguno de los síntomas siguientes?

|    |                    | No                       | Si                       |
|----|--------------------|--------------------------|--------------------------|
| 33 | Pérdida del olfato | <input type="checkbox"/> | <input type="checkbox"/> |
| 34 | Pérdida del gusto  | <input type="checkbox"/> | <input type="checkbox"/> |

\*No (0), Si (1)





#### ANNEX 4: ASSESSMENT OF SAFETY

##### Safety Diary Card

##### OTROS SÍNTOMAS:

¿Ha notado alguno de los siguientes síntomas en las últimas 24 horas?

|                                     | En absoluto | Un poco | Algo | Bastante | Muchísimo |
|-------------------------------------|-------------|---------|------|----------|-----------|
| Dolor local en el lugar de infusión |             |         |      |          |           |
| Inflamación lugar de infusión       |             |         |      |          |           |
| Erupción cutánea                    |             |         |      |          |           |
| Prurito o Picor                     |             |         |      |          |           |

\* En absoluto (0), Un poco (1), Algo (2), Bastante (3), Muchísimo (4). Si se registra alguno de estos síntomas por primera vez, COORDINACIÓN recibirá una alerta (por email) para evaluar mediante una visita telefónica dicha sintomatología y su gravedad.

Aparte de los síntomas preguntados anteriormente, ¿ha notado algún otro síntoma?:  NO  SI

En caso afirmativo, ¿qué otro/s síntomas ha notado?

| SINTOMA | Fecha y hora de inicio | Fecha y hora de fin | Severidad |      |          |           |
|---------|------------------------|---------------------|-----------|------|----------|-----------|
|         |                        |                     | Un poco   | Algo | Bastante | Muchísimo |
|         |                        |                     |           |      |          |           |
|         |                        |                     |           |      |          |           |
|         |                        |                     |           |      |          |           |

##### Telephone Safety Assessment

##### EVENTOS ADVERSOS:

En caso de ser un evento grave o inesperado, llamar a COORDINACIÓN y completar el apartado I del documento de SAE en papel, fotografiarlo y enviarlo per baliza y/o correo electrónico a [safety@fls-rs.com](mailto:safety@fls-rs.com)

| Tipo de EVENTO ADVERSO              | (0) NO<br>(1) SI | Fecha y hora de inicio | Fecha y hora de fin | Grado 1-5 (*) | Relacionado (SI/NO) | Decisión investigador |
|-------------------------------------|------------------|------------------------|---------------------|---------------|---------------------|-----------------------|
| Erupción cutánea                    |                  |                        |                     |               |                     |                       |
| Prurito o Picor                     |                  |                        |                     |               |                     |                       |
| Dolor local en el lugar de infusión |                  |                        |                     |               |                     |                       |
| Inflamación lugar de infusión       |                  |                        |                     |               |                     |                       |
| Fiebre                              |                  |                        |                     |               |                     |                       |
| Cefalea                             |                  |                        |                     |               |                     |                       |
| Náusea                              |                  |                        |                     |               |                     |                       |
| Vómito                              |                  |                        |                     |               |                     |                       |

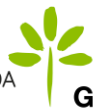

|                            |  |  |  |  |  |  |
|----------------------------|--|--|--|--|--|--|
| Diarrea                    |  |  |  |  |  |  |
| Dolor abdominal            |  |  |  |  |  |  |
| Dolor muscular o articular |  |  |  |  |  |  |
| Tos                        |  |  |  |  |  |  |
| Disnea                     |  |  |  |  |  |  |
| Fatiga                     |  |  |  |  |  |  |
| Mareo                      |  |  |  |  |  |  |
| Somnolencia                |  |  |  |  |  |  |
| Otro:                      |  |  |  |  |  |  |

\* **Grado 1 = Leve, 2=Moderado, 3=Severo, 4=potencialmente mortal, 5= Muerte. Guía de soporte para puntuar grados estará disponible para todo el personal médico del estudio**



**ANNEX 5: HEMOVIGILANCE: DETECTION, ASSESSEMENT AND REGISTER OF INCIDENTS RELATED TO TRANSFUSION**

Attached separately.

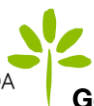

**ANNEX 6: WEB CONTENT**

Attached separately.



**ANNEX 7: COMPOSITION, RESPONSIBILITIES AND FLOW CHART FOR DSMB**

Attached separately.



## ANNEX 8: LIST OF PARTICIPATING SITES

Attached separately.

Version 2.0 10<sup>th</sup> December 2020

| Site                                                                                               | Principal Investigator                                                                                                                 | Status            |
|----------------------------------------------------------------------------------------------------|----------------------------------------------------------------------------------------------------------------------------------------|-------------------|
| Hospital Germans Trias i Pujol                                                                     | Oriol Mitjà                                                                                                                            | Submitted to EC.  |
| Hospital Universitari de Bellvitge                                                                 | Carlota Gudiol/ Pierre Malchair                                                                                                        | Submitted to EC . |
| Hospital de Sant Joan Despí Moisès Broggi                                                          | Ana Coloma                                                                                                                             | Submitted to EC . |
| CUAP Badalona<br>CUAP Santa Coloma<br><i>Atenció Primària Àrea Metropolitana Nord de Barcelona</i> | Thatiana Vertiz<br>Núria Prat ( <i>investigadora coordinadora d'AP Metropolitana Nord</i> )                                            | Submitted to EC   |
| CUAP Manresa<br><i>Atenció Primària Àrea Catalunya Central</i>                                     | Dra. Anna Maria Ramírez Morros<br>Dra. Anna Ruiz Comellas<br>Anna Forcada ( <i>investigadora coordinadora d'AP Catalunya Central</i> ) | Submitted to EC   |
| Hospital Sant Bernabé de Berga                                                                     | Dra. Rosa Amado Simón<br>Joana Rodríguez Codina                                                                                        | Submitted to EC   |



## ANNEX 9: PARTICIPANT ID CARD

### Información para contacto en caso de emergencia:

Médico del estudio: .....

Hospital: .....

Teléfono de contacto: .....

### TARJETA DE IDENTIFICACIÓN

**Código: COnV-ert**

Sr/Sra.

.....

ID Participante

.....

Apreciado participante:

Por favor, lleve consigo esta tarjeta e informe a todos los médicos que le visiten durante y tras su participación en este estudio.

Informe también al equipo investigador si tuviese alguna visita planificada o inesperada en otro hospital o consulta durante el estudio.

Muchas gracias.

### Información para contacto con el equipo investigador:

Si, en una emergencia, fuera necesario saber si el participante ha recibido plasma convaleciente o placebo; o si tuviera cualquier tipo de pregunta, por favor, contacte con:

Investigadores: Andrea Alemany, Marc Corbacho.

Dirección: Hospital Germans Trias i Pujol, Badalona.

T: 611 69 66 79

**ANNEXES TO THE PROTOCOL ATTACHED SEPARATELY:**

**Annex 1: Donor selection, collection and processing procedures for convalescent MBT plasma preparation from donors recovered from COVID-19**

Annex 1.1: Criteria for accepting / excluding donors of whole blood and blood components

Annex 1.2: Update of the protocol for the selection of COVID-19 convalescent plasma donors

Annex 1.3: Register of the assessment of COVID-19 convalescent plasma donor

Annex 1.4: Convalescent label template E9744

Annex 1.5: Methylene Blue Inactivation process

**Annex 5: Hemovigilance: detection, assessment and register of incidents related to transfusion**

**Annex 6: Web content**

**Annex 7: Composition, responsibilities and flow chart for DSMB**



**Annex 1.1: Criteria for accepting / excluding donors of whole blood and blood components**

TÍTOL: CRITERIS PER ACCEPTAR / EXCLOURE ALS DONANTS DE SANG TOTAL I  
COMPONENTS SANGUINIS

ÍNDEX

|                                                                                    |    |
|------------------------------------------------------------------------------------|----|
| 1.- OBJECTE.....                                                                   | 2  |
| 2.- ABAST.....                                                                     | 2  |
| 3.- REFERÈNCIES.....                                                               | 2  |
| 4.- DESENVOLUPAMENT.....                                                           | 3  |
| 4.1.- Definicions.....                                                             | 3  |
| 4.2.- Identificació, exploració i consideracions generals del donant.....          | 3  |
| 4.3.- Criteris i condicions a considerar, referents a malalties o antecedents..... | 7  |
| 4.4.- Donacions per afèresi.....                                                   | 52 |
| 4.5.- Criteris específics per a una autotransfusió (sang total).....               | 56 |
| 4.6.- Criteris específics per a una donació de sang total per a PANELL.....        | 57 |
| 4.7.- Bibliografia.....                                                            | 58 |
| 5.- MEDI AMBIENT.....                                                              | 59 |
| 6.- PREVENCIÓ DE RISCOS.....                                                       | 59 |
| 7.- DOCUMENTS I REGISTRES.....                                                     | 60 |
| 8.- MODIFICACIONS DEL DOCUMENT.....                                                | 60 |
| 9.- ANNEXOS.....                                                                   | 81 |

Dra. M. Saez Bruguera      Dr. Ll. Puig Rovira  
Dra. N. Nomen Calvet  
Dra. P. Ortiz Murillo  
REVISA :  
Comissió d'Hemodonació  
(Dra. P. Ortiz Murillo)  
Sra. V. Gonzalez  
Gutierrez  
APROVA :

ELABORA :

Data : 21/04/17    Data : 25/04/17    Data : 26/04/17

**TÍTOL: CRITERIS PER ACCEPTAR / EXCLOURE ALS DONANTS DE SANG TOTAL I COMPONENTS SANGUINIS****1.- OBJECTE**

Descriure els criteris per acceptar o excloure els donants de sang total i components sanguinis, segons la història clínica i l'exploració.

**2.- ABAST**

Les persones que venen als Centres o als Equips mòbils per fer una donació de sang total o components sanguinis i a les que s'extreu sang destinada al pannel de screening.

**3.- REFERÈNCIES**

- Real Decreto 1088/2005, de 16 de septiembre.
- Estándares de Acreditación en Transfusión Sanguínea. Comité de Acreditación en Transfusión. 4a edición 2012.
  - Promoción de la donación de sangre. Criterios básicos para la selección de donantes de sangre y componentes. Ministerio de Sanidad y Consumo.
- Whole Blood and Component Donor Selection Guidelines. 13 febrero 2014 i Cange Notification UK National Blood Services fins a març 2017 ([www.transfusionguidelines.org.uk/dsg/wb/latest-updates](http://www.transfusionguidelines.org.uk/dsg/wb/latest-updates))

El present document T-DI-EM-001 engloba tots els supòsits legals, i és més restrictiu encara en alguns punts.

**TÍTOL: CRITERIS PER ACCEPTAR / EXCLOURE ALS DONANTS DE SANG TOTAL I COMPONENTS SANGUINIS****4.- DESENVOLUPAMENT****Nota**

Cal fer l'interrogatori del donant en les màximes condicions possibles de confidencialitat, sense acompanyants i, si és possible, amb les portes tancades.

seguir pel donant en cas d'exclusió.

Aquesta pràctica proporciona una imatge de més rigor en el procediment aplicat,

evita les susceptibilitats que el qüestionari genera en molts donants habituals i transmet una sensació de seguretat, tracte personalitzat i atenció als donants.

**4.1. DEFINICIONS**

**Exclusió definitiva:** La persona queda exclosa com a donant per la resta de la seva vida.

**Exclusió indefinida:** La persona queda exclosa com a donant per un període no definit, més o menys llarg, en funció de l'evolució de la causa que ha condicionat l'exclusió. Habitualment és fins a la resolució de la malaltia o la desaparició de la simptomatologia.

Els donants que no puguin donar, és a dir, els que siguin exclosos han de ser tractats amb summa delicadesa. Si l'exclusió és temporal s'ha de:

Explicar al donant el motiu de l'exclusió, així com la seva durada.

Animar el donant a tornar al final del període d'exclusió.

Fer entendre el donant que la seva sang continua sent molt necessària.

**4.2. IDENTIFICACIÓ, EXPLORACIÓ I CONSIDERACIONS GENERALS DEL DONANT**

L'actitud de la persona que realitza l'entrevista prèvia a la donació és fonamental. Ha de rebre a la persona que ve a donar com un possible donant i no com un candidat a ser rebutjat, partint de la premissa que tota persona més gran de 18 anys i amb bona salut pot ser donant.

Si l'exclusió és definitiva s'ha de: Tractar el donant amb molta delicadesa. Explicar-li que encara pot continuar ajudant a la donació de sang reclutant amics, companys.

Només s'acceptaran com a donants de sang aquelles persones que després d'un adequat reconeixement denotin un bon estat de salut.

Prescindir, en la mesura possible, del procediment d'autoadministració del qüestionari i substituir-lo per una entrevista (que d'altra banda, obligatòriament, s'ha de realitzar sempre) entre un membre del personal sanitari entrenat i el potencial donant, el que permet alleugerir el procediment, propiciar decisions fonamentals respecte a les exclusions i, eventualment, orientar sobre les pautes a

**IDENTIFICACIÓ DEL DONANT**

Entenem que quan el donant escriu les seves dades personals i signa, queda suficientment identificat i que potser no és indispensable un document acreditatiu.

Malgrat això, per tal de garantir la pertinença de la sang donada i la traçabilitat dels futurs components sanguinis, s'ha de verificar la identitat dels donants:

## TÍTOL: CRITERIS PER ACCEPTAR / EXCLOURE ALS DONANTS DE SANG TOTAL I COMPONENTS SANGUINIS

l'entrevista.

1.- Als donants de primera vegada es verificarà la seva identitat mitjançant el DNI, passaport o carnet de conduir.

2.- Als donants registrats a eProgesa ni ha prou amb el carnet de donant o qualsevol documentació amb el nom i cognoms. En aquest cas es demanarà alguna dada personal que consti en eProgesa i haurà de coincidir per tal de confirmar la seva identitat (ex: Quin és el seu número de DNI? o Quina és la seva data de naixement?,...)

Tot i utilitzant algun document, sempre s'ha de preguntar i fer constar les dades actuals del domicili, ja que aquest pot estar desfasat.

En el cas de donants d'altres països, cal ser especialment curós en la presa correcta de les dades d'afiliació.

### IDIOMA

De forma general cal excloure a les persones que no entenguin el full d'exclusió i a les que sigui impossible fer un correcte interrogatori mèdic.

No s'acceptarà la participació de cap intèrpret, familiar o professionals i/o mediadors culturals, per garantir la confidencialitat de la història mèdica així com la veracitat de les respostes del donant i en conseqüència la qualitat de la selecció del donant.

### EDAT

Els límits d'edat per a la donació voluntària de sang se situen entre els 18 i 70 anys.

En les persones més grans de 65 i menors de 70 anys s'ha de fer una valoració acurada de possibles malalties cardíaques i vasculars (més freqüents en aquestes edats), per part del personal sanitari que fa

### PES

No han de donar les persones que pesin menys de 50 kg.

El volum de sang extret no ha de superar el 13% de la volèmia teòrica del donant. Així, una donació normal (450 +/- 45 mil·lilitres de sang, inclosos els presos per a anàlisi) ha de ser extreta a persones de pes superior a 50 Kg.

S'han d'excloure les persones amb una pèrdua patològica de pes, és a dir, superior al 10% del pes en 1 mes, sense una causa justificada (tractament aprimador).

### FREQÜÈNCIA DE DONACIONS EI

interval entre dues donacions de sang total consecutives, excepte en circumstàncies excepcionals, no ha de ser inferior a 2 mesos. El nombre màxim d'extraccions anuals serà de 4 per als homes i de 3 per a les dones.

Cas de donació d'afèresi veure el punt 4.4.

### ASPECTE DEL DONANT

S'observarà si existeix: pal·lidesa, cianosi, icterícia, dispnea, desnutrició, sensació de debilitat, inestabilitat mental o signes d'intoxicació alcohòlica o drogoaddicció, tots els quals contraindiquen la donació.

### POLS (freqüència cardíaca) I TENSIÓ ARTERIAL (TA)

S'ha de determinar abans de cada donació la pressió sanguínia i el pols. En tot cas, el pols ha de ser regular, i comprès entre 50 i 100 pulsacions/min.

Els atletes presenten freqüències cardíaques més baixes. Els donants amb bradicàrdia (per sota de 50 p/min) han de ser interrogats sobre les seves activitats esportives, ja que en el seu cas podrien ser

## TÍTOL: CRITERIS PER ACCEPTAR / EXCLOURE ALS DONANTS DE SANG TOTAL I COMPONENTS SANGUINIS

Si el pols <60 per minut i el donant està en tractament Veure HIPERTENSIÓ ARTERIAL

La T.A. sistòlica ha de ser inferior a 180 mmHg i superior a 90 mmHg.

La T.A. diastòlica entre 50-100 mmHg.

Pot acceptar-se si hipertensió lleu sempre que la pressió diastòlica es mantingui per sota de 100 mmHg.

Moltes persones tenen, de forma habitual, xifres de tensió arterial sistòlica de 100-90 mmHg, i 50-60 mmHg de diastòlica, sense tendència a presentar mareig o desmai pel que poden ser acceptats com a donants si és la seva pressió habitual. És recomanable que aquests donants beguin abundants líquids no alcohòlics abans i després de la donació especialment si fa calor.

S'ha de tenir en compte que determinades taucicàrdies i alteracions del pols i de la T.A., són fruit del nerviosisme, i solen normalitzar-se al cap d'uns minuts. Per aquest motiu, abans d'excloure al donant, s'ha de procedir, transcorreguts uns 10 minuts de repòs i tranquil·litat, a una segona mesura en els resultats del qual es basarà la decisió d'acceptar o excloure el donant. De forma sistemàtica, la segona mesura de la TA es realitzarà a l'altre braç, i es comprovarà que la roba o la pròpia posició no alteren el flux sanguini.

Han de ser valorades també les diferències tensionals importants en els donants habituals. Així, en un donant habitual, amb tensions sistòliques prèvies de 160-180, una xifra de 110, amb o sense medicació, podria donar lloc a la seva exclusió temporal.

### HEMOGLOBINA

La xifra d'hemoglobina és la causa més

freqüent de rebuig, sobretot en dones (3,9 vs 0,25 en homes en alguns estudis).

Es consideraran com a aptes per a la donació:

- Dones amb xifres de Hb de 12,5 g/dL o superior.

- Homes amb xifres de Hb de 13,5 g/dL o superior.

Es podran acceptar dones amb una Hb de 12 g/dL o superior i homes amb una Hb de 13 g/dL o superior, si aquestes són les seves xifres d'hemoglobina habituals.

Encara que els criteris per a la donació de sang total i la donació per afèresis de plaquetes i plasma són similars, aquests últims produeixen menor pèrdua d'hemoglobina, i poden acceptar-se des de 11,5 g/dl (dones) i des de 12,5 g/dl (homes).

Limitar el nombre de donacions d'hematies a les dones proclius a l'anèmia ferropènica a 1-2 donacions/any, evitarà que l'anèmia es reproduïxi periòdicament i acabin per abandonar la donació cansades de la repetició de les exclusions.

### RÈGIM DE MENJARS

És convenient que el donant no es trobi en període de dejú prolongat, però és aconsellable que hagin transcorregut com a mínim dues hores després d'un dinar "abundant" ja que les mostres de plasma molt lipèmiques no poden ser analitzades en determinats aparells, i la seva donació no serveix per a fraccionament posterior. En front d'un dinar lleuger de ½ a 1 hora és suficient.

El dejuni no ha de ser motiu d'exclusió. Si preocupa, pot ser útil convidar al donant a un petit refrigeri (una beguda i alguna pasta, p.ex.) abans de la donació, però mai excloure'l. La ingestió d'uns 400 mil·lilitres

## TÍTOL: CRITERIS PER ACCEPTAR / EXCLOURE ALS DONANTS DE SANG TOTAL I COMPONENTS SANGUINIS

d'aigua abans de la donació ajuda a prevenir els mareigs i les reaccions vasovagals postdonació (American Heart Association 56th Annual High Blood Pressure Research Conference, Orlando 2002).

### LLOC DE PUNCIÓ

No podran donar sang les persones amb lesió cutània / èczema al lloc de la venipunció, s'exclouran de forma indefinida fins a la curació.

Les persones que presentin lesions que facin sospitar drogoaddicció, seran exclosos de forma definitiva.

PROFESSIÓ/AFICIONS DEL DONANT Al interrogatori constaran les dades relacionades amb la professió i aficions del donant.

S'ha d'excloure les persones que després de la donació tornen a una activitat professional o esportiva perillosa, ja que poden patir una reacció retardada que pot ser causa d'accident.

Per això, les persones amb professions tals com conductors d'autobús, taxi, tren i ambulàncies, pilots, controladors aeris, bombers, muntanyencs, escaladors, bussejadors, escafandristes, operaris de maquinària pesada com a grues, miners, treballs en altura, etc. donaran sang després de finalitzada la seva jornada laboral, de manera tal que puguin transcórrer 12-24 hores de descans (una nit

de son reparador) entre la donació i la represa de la seva activitat laboral.

Els donants han de ser advertits del risc de lipotímia o síncope postdonació, i de la conveniència de no practicar activitats esportives tals com a motociclisme, automobilisme, paracaigudisme, escalada, escafandriste, esquí, etc. fins al dia següent, després d'una nit de descans.

Advertir que si fan esport de competició els seu rendiment serà més baix durant dues setmanes.

Els donants que pertanyen als cossos de seguretat i porten armes reglamentàries poden donar sang sense necessitat de desprendre's de la seva arma. Aquestes van dins la cartutxera i amb la seguretat posada. La reacció en front d'una lipotímia mai ha estat treure l'arma de la cartutxera.

Personal sanitari. No hi ha proves que suggereixin que el personal sanitari que intervé en la cura de pacients infectats per virus transmissibles per transfusió, o que treballen en laboratoris hospitalaris, tinguin un major risc de ser portadors. Per tant, poden ser acceptats com a donants.

### ESTADES A LA PRESÓ

Les persones ingressades en institucions penitenciàries, per un temps superior a 72 hores, que no han pres drogues per via endovenosa, queden excloses per un període de 4 mesos.

**TÍTOL: CRITERIS PER ACCEPTAR / EXCLOURE ALS DONANTS DE SANG TOTAL I  
COMPONENTS SANGUINIS****4.3. CRITERIS I CONDICIONS A CONSIDERAR, REFERENTS A MALALTIES O  
ANTECEDENTS (ordenats per ordre alfabètic, consultar a la pàgina corresponent):**

En cas de què en un mateix donant concorrin diferents causes d'exclusions, prevaldrà la més llarga i restrictiva

|                                                                         |    |
|-------------------------------------------------------------------------|----|
| ABSCessos (ABSCÉS O FLEGMÓ DENTAL, ABSCÉS AMIGDALÍ ETC.) .....          | 15 |
| ACCIDENTS (FRACTURES, FERIDES, CONTUSIONS MÚLTIPLES).....               | 15 |
| ACCIDENT VASCULAR CEREBRAL .....                                        | 15 |
| ACITRETINA (NEOTIGASON®) .....                                          | 15 |
| ACNE .....                                                              | 15 |
| ACUPUNTURA, MESOTERÀPIA, TRACTAMENT AMB TOXINA BOTULÍNICA (BOTOX) ..... | 15 |
| ALCOHOLISME .....                                                       | 15 |
| AL·LÈRGIA .....                                                         | 15 |
| AL·LÈRGIA ALIMENTÀRIA .....                                             | 15 |
| AL·LÈRGIA A MEDICAMENTS.....                                            | 15 |
| AMEBIASI .....                                                          | 15 |
| AMIGDALITIS .....                                                       | 16 |
| ANÈMIA .....                                                            | 16 |
| ANESTÈSIA GENERAL / LOCAL / EPIDURAL .....                              | 16 |
| ANGINA DE PIT .....                                                     | 16 |
| ANORÈXIA NERVIOSA .....                                                 | 16 |
| ANSIOLÍTICS (SEDANTS, TRANQUIL·LITZANTS) .....                          | 16 |
| ANTIÀCIDS .....                                                         | 16 |
| ANTIBIÒTICS .....                                                       | 16 |
| ANTICOAGULANTS ORALS .....                                              | 16 |
| ANTICOSSOS MONOCLONALS .....                                            | 16 |
| ANTIDEPRESSIUS .....                                                    | 16 |
| ANTIDIABÈTICS ORALS (HIPOGLICEMIANTS ORALS) .....                       | 16 |
| ANTIEPILÈPTICS / ANTICONVULSIVANTS .....                                | 16 |
| ANTIFÚNGICS .....                                                       | 17 |
| ANTIHIPERTENSIVS.....                                                   | 17 |
| ANTIHISTAMÍNICS .....                                                   | 17 |
| ANTINFLAMATORIS NO ESTEROÏDALS .....                                    | 17 |
| ANTIMICÒTICS.....                                                       | 17 |
| ANTIOBESITAT .....                                                      | 17 |



|                                     |    |
|-------------------------------------|----|
| ANTITABAC .....                     | 17 |
| ANTITIROÏDALS .....                 | 17 |
| ARÍTMIES (TRASTORNS DEL RITME)..... | 17 |
| ARTERITIS- ARTERIOPATIA .....       | 17 |
| ARTRITIS ESCAPULOHUMERAL .....      | 17 |
| ARTRITIS PSORIÀSICA .....           | 17 |
| ARTRITIS REUMATOIDEA.....           | 17 |

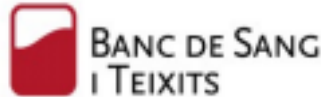

MANUAL DE  
TÈCNiques

Codi: T-DI-EM-001

Revisió: 13

Data: 21 d'abril de 2017

Pàgina 8/80

TÍTOL: CRITERIS PER ACCEPTAR / EXCLOURE ALS DONANTS DE SANG TOTAL I COMPONENTS SANGUINIS

|                                     |                  |
|-------------------------------------|------------------|
| ARTRITIS REUMATOIDEA JUVENIL .....  | 17               |
| ARTROSI .....                       | 17               |
| ASMA .....                          | 17               |
| ASSAIGS CLÍNICS .....               | 17               |
| AUTOIMMUNES .....                   | 18               |
| AVORTAMENT .....                    | 18               |
| BABESIOSI .....                     | 18               |
| BEHÇET .....                        | 18               |
| BETABLOQUEJANTS .....               | 18               |
| BORRELIOSI (MALALTIA DE LYME) ..... | 18               |
| BRONCODILATADORS (INHALADORS) ..... | 18               |
| BRONQUITIS AGUDA .....              | 18               |
| BRONQUITIS CRÒNICA .....            | 18               |
| BRUCEL·LOSI .....                   | 18 BUF           |
| ANORGÀNIC .....                     | 18 BULÍMIA       |
| .....                               | 18 CÀNCER        |
| .....                               | 18 CANDIDIASI    |
| ORAL / VAGINAL .....                | 19 CANNABIS      |
| .....                               | 19 CANVI DE SEXE |
| .....                               | 19 CARDIOPATIA   |
| CONGÈNITA (CIA, CIV ETC.) .....     | 19 CATÈTERS      |
| .....                               | 19 CEFALEA       |
| .....                               | 19 CEGUESA       |
| .....                               | 20 CELIAQUIA     |
| .....                               | 20 CHAGAS,       |
| MALALTIA DE .....                   | 20               |
| CHICUNGUNYA, FEBRE DE .....         | 20               |
| CIRROSI HEPÀTICA .....              | 20               |
| CIRURGIA MAJOR I MENOR .....        | 20               |
| CISTITIS .....                      | 20               |
| CLAUDICACIÓ INTERMITENT .....       | 20               |
| CLOMIFÈ (OMIFIN®) .....             | 20               |
| COCAÏNA .....                       | 20               |
| COL·LAGENOSI .....                  | 20               |
| COL·LIRIS/GOTES OÏDA .....          | 20               |
| COLECISTITIS .....                  | 20               |
| COLESTEROL ELEVAT .....             | 21               |
| CÒLIC NEFRÍTIC .....                | 21               |
| COLITIS INFECCIOSA .....            | 21               |
| COLITIS ULCEROSA .....              | 21               |

|                                                        |    |
|--------------------------------------------------------|----|
| CÒLON IRRITABLE .....                                  | 21 |
| COLOSTOMIA .....                                       | 21 |
| CONTACTE AMB PACIENTS AMB MALALTIES INFECCIOSES .....  | 21 |
| CONTACTE ESTRET AMB PACIENTS AMB HEPATITIS VIRAL ..... | 21 |

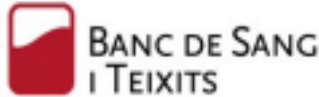

MANUAL DE  
TÈCNiques

Codi: T-DI-EM-001

Revisió: 13

Data: 21 d'abril de 2017

Pàgina 9/80

TÍTOL: CRITERIS PER ACCEPTAR / EXCLOURE ALS DONANTS DE SANG TOTAL I COMPONENTS SANGUINIS

|                                                         |    |
|---------------------------------------------------------|----|
| CONTRACEPTIUS (ANOVULATORIS, IMPLANTS) .....            | 21 |
| CONVULSIONS .....                                       | 21 |
| COREA HUNTINGTON.....                                   | 21 |
| CÒRNIA / ESCLERÒTICA (TRASPLANTAMENT) .....             | 21 |
| CORTICOIDES .....                                       | 22 |
| CREUTZFELDT – JAKOB, MALALTIA DE .....                  | 22 |
| CROHN, MALALTIA DE .....                                | 22 |
| DENGUE .....                                            | 22 |
| DENTISTA.....                                           | 22 |
| DEPRESSIÓ .....                                         | 22 |
| DERMATITIS.....                                         | 22 |
| DESCONGESTIONANTS NASALS .....                          | 22 |
| DIABETIS INSÍPIDA .....                                 | 22 |
| DIABETIS MELLITUS .....                                 | 23 |
| DIARREA .....                                           | 23 |
| DIATESIS HEMORRÀGICA ANORMAL .....                      | 23 |
| DIFTÈRIA .....                                          | 23 |
| DIGOXINA .....                                          | 23 |
| DISENTERIA AMEBIANA .....                               | 23 |
| DISCAPACITAT PSÍQUICA I/O FÍSICA. ....                  | 23 |
| DIÜRÈTICS .....                                         | 23 |
| DIVERTICULOSI .....                                     | 23 |
| DOWN, SÍNDROME DE.....                                  | 23 |
| DROGUES .....                                           | 23 |
| DUODENITIS .....                                        | 24 |
| ÈCZEMA .....                                            | 24 |
| EBOLA, MALALTIA D' .....                                | 24 |
| EDEMA DE QUINCKE .....                                  | 24 |
| ELECTRÒLISI (ELECTRÒLISI PERCUTÀNIA TISSULAR) .....     | 24 |
| EMBARÀS .....                                           | 24 |
| EMFISEMA PULMONAR .....                                 | 24 |
| EMPELTS .....                                           | 24 |
| ENCEFALITIS .....                                       | 25 |
| ENCEFALOPATIA ESPONGIFORME .....                        | 25 |
| ENDOCARDITIS .....                                      | 25 |
| ENDOMETRIOSI.....                                       | 25 |
| ENDOSCÒPIA .....                                        | 25 |
| EPILEPSIA .....                                         | 25 |
| EPISODIS REPETITS DE SÍNCOPE .....                      | 25 |
| ERITEMA (NODÓS I POLIMORF) .....                        | 25 |
| ERITRODÈRMIA .....                                      | 25 |
| ESCLEROSI MÚLTIPLE / ESCLEROSI LATERAL AMIOTRÓFICA..... | 25 |
| ESPLENECTOMIA .....                                     | 26 |

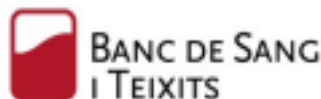

MANUAL DE  
TÈCNiques

Codi: T-DI-EM-001  
Revisió: 13

Data: 21 d'abril de 2017

Pàgina 10/80

TÍTOL: CRITERIS PER ACCEPTAR / EXCLOURE ALS DONANTS DE SANG TOTAL I COMPONENTS SANGUINIS

|                                                                            |    |
|----------------------------------------------------------------------------|----|
| ESQUISTOSOMIASI .....                                                      | 26 |
| ESTEATOSIS HEPÀTICA .....                                                  | 26 |
| ESTUDI MÈDIC.....                                                          | 26 |
| EXPLORACIONS MÈDIQUES .....                                                | 26 |
| EXPOSICIÓ ACCIDENTAL A SANG I/O INSTRUMENTS CONTAMINATS AMB SANG .....     | 26 |
| EXTRACCIÓ DENTAL .....                                                     | 26 |
| FARINGITIS .....                                                           | 26 |
| FATIGA CRÒNICA .....                                                       | 26 |
| FEBRE > 38°C .....                                                         | 26 |
| FEBRE AFTOSA .....                                                         | 27 |
| FEBRE DEL FENC (HENO) .....                                                | 27 |
| FEBRE D'ORIGEN GRIPAL .....                                                | 27 |
| FEBRE DE MALTA .....                                                       | 27 |
| FEBRE Q .....                                                              | 27 |
| FEBRE RECURRENT .....                                                      | 27 |
| FEBRE REUMÀTICA .....                                                      | 27 |
| FEBRE TIFOIDE .....                                                        | 27 |
| FERROTÈRÀPIA .....                                                         | 27 |
| FIBROMIÀLGIA .....                                                         | 27 |
| FILARIOSI .....                                                            | 27 |
| FINASTERIDE (PROSCAR®, PROPECIA®, FINASTERIDA®, ATIVOL®, EUCOPROST®) ..... | 27 |
| .....                                                                      | 27 |
| DENTAL .....                                                               | 27 |
| ÒSSIES .....                                                               | 27 |
| .....                                                                      | 27 |
| GAMMAGLOBULINES .....                                                      | 27 |
| GASTRECTOMIA.....                                                          | 27 |
| GASTRITIS .....                                                            | 27 |
| GASTROENTERITIS .....                                                      | 28 |
| GIARDIASI .....                                                            | 28 |
| GILBERT, SÍNDROME DE.....                                                  | 28 |
| GLAUCOMA .....                                                             | 28 |
| GLOMERULONEFRITIS .....                                                    | 28 |
| GONORREA .....                                                             | 28 |
| GOTA .....                                                                 | 28 |
| GRANULOMA INGUINAL .....                                                   | 28 |
| .....                                                                      | 28 |
| BARRÉ, SÍNDROME DE .....                                                   | 28 |
| HEMOCROMATOSIS .....                                                       | 28 |
| HEMORROIDES .....                                                          | 28 |
| HEPATITIS .....                                                            | 28 |
| HEPATITIS VÍRICA .....                                                     | 28 |
| HÈRNIA HIATUS.....                                                         | 29 |
| HERPES GENITAL .....                                                       | 29 |

**TÍTOL: CRITERIS PER ACCEPTAR / EXCLOURE ALS DONANTS DE SANG TOTAL I  
COMPONENTS SANGUINIS**

|                                                      |                        |
|------------------------------------------------------|------------------------|
| HERPES LABIAL .....                                  | 30                     |
| HERPES SIMPLE (ALTRES LOCALITZACIONS) .....          | 30                     |
| HERPES ZOSTER .....                                  | 30                     |
| HIPERCOLESTEROLÈMIA / HIPERLIPIDÈMIA ESSENCIAL ..... | 30                     |
| HIPERPARATIROIDISME (TRACTAT).....                   | 30                     |
| HIPERTENSIÓ ARTERIAL .....                           | 30                     |
| HIPERTIROÏDISME .....                                | 30                     |
| HIPNÒTICS .....                                      | 30                     |
| HIPOTENSIÓ ARTERIAL.....                             | 30                     |
| HIPOTIROÏDISME.....                                  | 30                     |
| HISTERECTOMIA .....                                  | 30                     |
| HOBBIES PERILLOSOS, .....                            | 30                     |
| HOMEOPATIA .....                                     | 30                     |
| HORMONAL (TRACTAMENT DE REPOSICIÓ).....              | 31                     |
| HORMONES PITUITÀRIES / HORMONA DEL CREIXEMENT.....   | 31 HTLV-<br>I/II ..... |
| (ANTECEDENTS DE) .....                               | 31 ICTERÍCIA           |
| .....                                                | 31 ICTIOSI             |
| .....                                                | 31 ILEOSTOMÍA          |
| .....                                                | 31 IMMUNITZACIONS      |
| .....                                                | 31 IMMUNOGLOBULINES    |
| .....                                                | 31 INFART DE MIOCARDI  |
| .....                                                | 31 INFECCIÓ            |
| .....                                                | 31 INFECCIÓ            |
| URINÀRIA .....                                       | 32 INFERTILITAT        |
| (TRACTAMENT DE LA) .....                             | 32 INHALADORS          |
| .....                                                | 32                     |
| INJECCIONS.....                                      | 32                     |
| INJECCIONS DESENSIBILITZANTS .....                   | 32                     |
| INOCULACIÓ ACCIDENTAL .....                          | 32 IODE                |
| RADIACTIU .....                                      | 32                     |
| ISOTRETINOÍNA (ROACUTAN) .....                       | 32                     |
| KALA-AZAR (LEISHMANIOSI VISCERAL) .....              | 32                     |
| KAPOSI .....                                         | 32                     |
| LARINGITIS .....                                     | 32                     |
| LÀSER (TRACTAMENT).....                              | 32                     |
| LEGIONEL·LA .....                                    | 32                     |
| LEISHMANIOSI CUTÀNIA .....                           | 32                     |
| LEPRA .....                                          | 32                     |
| LEPTOSPIROSI .....                                   | 33                     |
| LIMFOGRANULOMA VENERI .....                          | 33                     |
| LIPOTÍMIES / DESMAIS .....                           | 33                     |
| LIQUEN PLA .....                                     | 33 LITI                |
| .....                                                | 33 LITIASI             |
| BILIAR .....                                         | 33                     |

**TÍTOL: CRITERIS PER ACCEPTAR / EXCLOURE ALS DONANTS DE SANG TOTAL I  
COMPONENTS SANGUINIS**

|                                            |    |
|--------------------------------------------|----|
| MALALTIES AL·LÈRGiques                     | 33 |
| MALALTIES AUTOIMMUNES                      | 34 |
| MALALTIES CARDIOVASCULARS                  | 34 |
| MALALTIES ENDOCRINOLÒGiques                | 34 |
| MALALTIES GASTROINTESTINALS                | 34 |
| MALALTIES GENITOURINÀRIES                  | 34 |
| MALALTIES HEMATOLÒGiques                   | 35 |
| MALALTIES HEMATOLÒGiques: COAGULOPATIES    | 35 |
| MALALTIES INFECCIOSES                      | 35 |
| MALALTIES METABÒLiques                     | 36 |
| MALALTIES PSIQUIÀTRiques                   | 36 |
| MALALTIES RENALS                           | 36 |
| MALALTIES RESPIRATÒRIES                    | 36 |
| MALALTIES SISTEMA NERVIÓS CENTRAL          | 36 |
| MALALTIES TIROÏDALS                        | 37 |
| MALALTIES VENÈRIES O DE TRANSMISSIÓ SEXUAL | 37 |
| MALÀRIA (PALUDISME)                        | 37 |
| MANTOUX (PROVA DE LA TUBERCULINA)          | 38 |
| MARFAN, SÍNDROME DE                        | 38 |
| MASTOIDITIS                                | 38 |
| MEDICAMENTS                                | 38 |
| MELANOMA                                   | 40 |
| MENIÈRE, SÍNDROME DE                       | 40 |
| MENINGITIS                                 | 40 |
| MENSTRUACIÓ                                | 40 |
| MESOTERÀPIA                                | 40 |
| METOTREXATE                                | 40 |
| MIASTÈNIA / MIOPATIA                       | 40 |
| MICOSI FUNGOIDE                            | 40 |
| MICOSI UNGUIALS                            | 40 |
| MIGRANYA                                   | 40 |
| MOLA HIDATIDIFORME                         | 41 |
| MONONUCLEOSI INFECCIOSA                    | 41 |
| MUSSOL                                     | 41 |
| NEO-TIGASON                                | 41 |
| NERVIOSISME                                | 41 |
| NEUROCIRURGIA                              | 41 |
| NEUROFIBROMATOSI                           | 41 |
| OSTEOMIELITIS                              | 41 |
| OSTEOPOROSI PRIMÀRIA                       | 41 |
| PAGET (MALALTIA ÒSSIA)                     | 41 |
| PALUDISME                                  | 41 |
| PANCREATITIS                               | 41 |
| PAPILOMAVIRUS, INFECCIÓ                    | 41 |

**TÍTOL: CRITERIS PER ACCEPTAR / EXCLOURE ALS DONANTS DE SANG TOTAL I  
COMPONENTS SANGUINIS**

|                                                                     |             |
|---------------------------------------------------------------------|-------------|
| PARKINSON, MALALTIA DE .....                                        | 41          |
| PAROTIDITIS .....                                                   | 41          |
| PEGATS NICOTINA.....                                                | 41          |
| PÈMFIG .....                                                        | 42          |
| PÈRDUA DE CONEIXEMENT .....                                         | 42          |
| PERFORACIONS - PÍRCING (LÒBUL DE L'ORELLA, LLAVIS, NAS, ETC.) ..... | 42          |
| PERIARTERITIS ESCAPULOHUMERAL .....                                 | 42          |
| PERICARDITIS .....                                                  | 42          |
| PERITONITIS .....                                                   | 42 PEU      |
| D'ATLETA .....                                                      | 42 PIELITIS |
| .....                                                               | 42          |
| PIELONEFRITIS .....                                                 | 42          |
| PÍRCING CORPORAL .....                                              | 42          |
| PITIRIASI VERSICOLOR .....                                          | 42          |
| PNEUMÒNIA.....                                                      | 42          |
| PNEUMOTÒRAX .....                                                   | 42          |
| POLICITÈMIA VERA .....                                              | 43          |
| POLIGLOBÚLIA .....                                                  | 43          |
| POLIOMIELITIS .....                                                 | 43          |
| POLIPOSI .....                                                      | 43          |
| PRESSIÓ ARTERIAL ALTA .....                                         | 43          |
| PRESSIÓ ARTERIAL BAIXA .....                                        | 43          |
| PROCTITIS .....                                                     | 43          |
| PROFESSIÓ DEL DONANT .....                                          | 43          |
| PROFILAXI ANTIPALÚDICA .....                                        | 43          |
| PROSCAR <sup>®</sup> (FINASTERIDA) .....                            | 43          |
| PSORIASI .....                                                      | 43          |
| PÚRPURA TROMBOCITOPÈNICA IDIOPÀTICA .....                           | 43          |
| RAYNAUD, SÍNDROME DE .....                                          | 43          |
| REFREDAT COMÚ .....                                                 | 44          |
| REGNE UNIT (ESTANÇA) .....                                          | 44          |
| REITER, SÍNDROME DE .....                                           | 44          |
| RELACIONS SEXUALS .....                                             | 44          |
| REUMATISME POLIARTICULAR AGUT .....                                 | 44          |
| RINITIS AL·LÈRGICA .....                                            | 44          |
| RUBÈOLA .....                                                       | 44          |
| SALMONEL·LOSI NO TIFOIDEA .....                                     | 44          |
| SALPINGITIS .....                                                   | 44          |
| SARCOIDOSI .....                                                    | 44          |
| SEDACIÓ .....                                                       | 45          |
| SÉZARY, SÍNDROME DE.....                                            | 45          |
| SÍFILIS .....                                                       | 45          |
| SÍNDROME DE DOWN.....                                               | 45          |
| SÍNDROME D'IMMUNODEFICIÈNCIA ADQUIRIDA .....                        | 45          |

**TÍTOL: CRITERIS PER ACCEPTAR / EXCLOURE ALS DONANTS DE SANG TOTAL I  
COMPONENTS SANGUINIS**

|                                                           |               |
|-----------------------------------------------------------|---------------|
| SÍNDROME TÒXIC PER OLI DE COLZA .....                     | 45            |
| TALASSÈMIA .....                                          | 45            |
| TAMOXIFÈ .....                                            | 45            |
| TATUATGES .....                                           | 45            |
| TINYA .....                                               | 46            |
| TOXINA BOTULÍNICA .....                                   | 46            |
| TOXOPLASMOSEI .....                                       | 46            |
| TRACTAMENT MÈDIC .....                                    | 46            |
| TRANQUIL·LITZANTS .....                                   | 46            |
| TRANSAMINASES ELEVADES .....                              | 46            |
| TRANSFUSIÓ DE SANG O DERIVATS .....                       | 46            |
| TRAQUEÏTIS .....                                          | 46            |
| TRASPLANTAMENT DE TEIXIT O TRASPLANTAMENT CEL·LULAR ..... | 46            |
| TRAUMATISME MAJOR O MENOR .....                           | 46            |
| TRIPANOSOMIASI (M. DE CHAGAS) .....                       | 46            |
| TROMBOSI ARTERIAL / VENOSA PROFUNDA .....                 | 47            |
| TUBERCULOSI .....                                         | 47            |
| TUMORS MALIGNES .....                                     | 47            |
| ÚLCERA GASTRODUODENAL.....                                | 47            |
| URETRITIS INESPECÍFICA .....                              | 47            |
| URTICÀRIA (ALIMENTÀRIA).....                              | 47            |
| VACUNES .....                                             | 47            |
| VALVULOPATIES .....                                       | 49            |
| VARICEL·LA .....                                          | 49            |
| VASODILATADORS CORONARIS.....                             | 49            |
| VIATGES .....                                             | 49 VIH        |
| .....                                                     | 49 VIRUS      |
| DEL NIL OCCIDENTAL .....                                  | 49 VIRUS SARS |
| .....                                                     | 49 VITAMINES  |
| .....                                                     | 49 VITILIGEN  |
| .....                                                     | 49 WILSON,    |
| MALALTIA DE .....                                         | 50            |
| XENOTRASPLANT .....                                       | 50            |
| WOLF PARKINSON WHITE .....                                | 50 ZICA       |
| .....                                                     | 50            |

TÍTOL: CRITERIS PER ACCEPTAR / EXCLOURE ALS DONANTS DE SANG TOTAL I  
COMPONENTS SANGUINIS

ABSCCESSOS (abscessos o flegmó dental,  
abscessos amigdalí etc.)

Veure INFECCIÓ

ACCIDENTS (fractures, ferides,  
contusions múltiples)

- Ajornar l'extracció fins que el donant es trobi bé, i hagi reprès l'activitat habitual.
- En cas d'haver estat transfós, exclusió temporal de, almenys, 4 mesos.

ACCIDENT VASCULAR CEREBRAL

- Exclusió definitiva.
- No és motiu d'exclusió el haver estat diagnosticat d'amnèsia transitòria (pèrdua de memòria temporal freqüentment associada a la migranya).

ACITRETINA (NEOTIGASON®) Exclusió  
durant 2 anys pel seu efecte teratogènic.

Veure ACNE.  
Veure Psoriasis

ACNE

No és motiu d'exclusió llevat d'infecció secundària de les lesions.

Existeixen, tanmateix, determinats preparats utilitzats en el seu tractament que són teratògens i s'acumulen en sang durant llargs períodes de temps:

- Pot ser acceptat si les lesions no estan secundàriament infectades. Els tractaments tòpics i amb tetraciclina o eritromicina orals i acetat de ciproterona + etilnestradiol (Diane, Schering) no exclouen.

- Exclusió durant 1 mes després de l'última dosi d'Isotretinoïna sistèmica o tòpica (Roacutan®, Isotrex gel®...).

ACUPUNTURA, MESOTERÀPIA,  
TRACTAMENT AMB TOXINA

BOTULÍNICA (BOTOX)

No és motiu d'exclusió si s'ha realitzat amb material d'ús únic o adequadament esterilitzat. En cas de dubte, exclusió fins a transcorreguts 4 mesos de l'acabament del tractament.

Evidentment, la malaltia per la qual està sent tractat no ha de ser excloent.

ALCOHOLISME

- Intoxicació aguda: exclusió indefinida fins a la curació.
- Crònic: exclusió indefinida fins a la curació.

Les persones que toleren bé el tractament amb Antabus poden ser acceptats com a donants de sang total (no plasmafèresi / plaquetofèresi) ja que la dosi de medicament que pot arribar al receptor és extremadament baixa.

AL·LÈRGIA

Veure MALATIES AL·LÈRGiques /  
DERMATOLÒGiques

AL·LÈRGIA ALIMENTÀRIA

No és motiu d'exclusió.

AL·LÈRGIA A MEDICAMENTS

- L'al·lèrgia greu a medicaments (xoc anafilàctic, broncoespasme greu que requereix ingrés a urgències), és motiu d'exclusió durant 1 any després de l'última vegada que va estar en contacte amb el fàrmac.
- La presència de rash u altres manifestacions lleus són causa d'exclusió indefinida fins a la resolució de la simptomatologia.

AMEBIASI

Exclusió indefinida fins a la curació.



TÍTOL: CRITERIS PER ACCEPTAR / EXCLOURE ALS DONANTS DE SANG TOTAL I COMPONENTS SANGUINIS

AMIGDALITIS

Veure INFECCIÓ.

ANÈMIA

Davant d'una història d'anèmia s'han de valorar: la causa, l'estat actual, i el tractament.

L'antecedent d'anèmia ferropènica, no és motiu d'exclusió si en aquell moment no està en estudi o en tractament, i la causa que va originar l'anèmia no és motiu d'exclusió. La ferroteràpia de prevenció d'anèmia no és excloent.

Altres causes d'anèmia. Veure apartat corresponent.

ANESTÈSIA GENERAL / LOCAL / EPIDURAL

No és motiu d'exclusió "per se". L'exclusió i la durada, en el seu cas, dependran del procés base.

Veure CATÈTER

ANGINA DE PIT

Exclusió definitiva.

ANORÈXIA NERVIOSA

Exclusió indefinida fins a la curació.

ANSIOLÍTICS (Sedants, tranquil·litzants)

Poden donar si es troben bé.

Excepció: Veure BETABLOQUEJANTS.

ANTIÀCIDS

Per si mateixos no són causa d'exclusió.

En cas d'úlceres actives, ajornar la donació fins que el donant es trobi bé.

ANTIBIÒTICS

Es pot donar sempre que el donant hagi seguit un tractament antibiòtic per infecció i es trobi bé. Se n'acostuma a deixar uns 14 dies com a termini raonable de recuperació de la malaltia. Si s'administren de forma profilàctica no contraindiquen la donació.

L'eritromicina, la tetraciclina i altres antibiòtics presos per via oral o tòpica en el tractament de l'acne no contraindiquen la donació.

Veure INFECCIÓ I ACNE.  
Veure COL·LIRIS / GOTES OÏDA

ANTICOAGULANTS ORALS

L'exclusió serà definitiva si el tractament és per malaltia cardiovascular, trombosi de vena axil·lar, trombosi o tromboflebitis de repetició.

Contraindicació mentre s'estiguin prenent. Es podrà acceptar 7 dies després de deixar de prendre'ls, si es troba bé i s'ha trobat una causa específica que ha motivat l'ús dels anticoagulants, sempre que aquesta no sigui per si mateixa motiu d'exclusió.

ANTICOSSOS MONOCLONALS Exclusió fins 12 mesos de l'acabament del tractament, sempre que la malaltia de base no sigui motiu d'exclusió.

ANTIDEPRESSIUS

Veure MALALTIES PSIQUIÀTRIQUES.

ANTIDIABÈTICS ORALS (Hipoglicèmics orals)

Veure DIABETES MELLITUS

ANTIÈPILÈPTICS / ANTICONVULSIVANTS

Aclarir el motiu del tractament. Si són utilitzats per tractar dolor crònic, s'acceptarà el donant si la causa no és en si mateixa excloent.

**TÍTOL: CRITERIS PER ACCEPTAR / EXCLOURE ALS DONANTS DE SANG TOTAL I COMPONENTS SANGUINIS**

Atenció al fet de què alguns d'aquests medicaments són teratogènics.

Veure: EPILÈPSIA.

Veure: MEDICAMENTS TERATOGENICS

**ANTIFÚNGICS**

Micosis de la pell i ungles en tractament local no és motiu d'exclusió.

En cas de tractament sistèmic: Veure INFECCIÓ.

**ANTIHIPERTENSIVS**

Veure HIPERTENSIÓ.

**ANTIISTAMÍNICS**

Acceptar si el donant es troba bé.

**ANTINFLAMATORIS NO ESTEROÏDALS**

Valorar la raó del tractament, que serà la dada bàsica per decidir si s'accepta o no al donant.

Per a la donació de Plaquetes: Veure MEDICAMENTS.

**ANTIMICÒTICS**

Veure ANTIFÚNGICS.

**ANTIOBESITAT**

Acceptar si el donant es troba bé.

**ANTITABAC**

Les persones que utilitzen pegats de nicotina o esprais de bupropió hidrocloreuro (Zyntagac®, Quomem®), poden ser acceptats com a donants si es troben bé.

**ANTITIROÏDALS**

Veure MALALTIES TIROÏDALS.

**ARÍTMIES (TRASTORNS DEL RITME)**

Cada cas ha de ser valorat individualment i és convenient sol·licitar l'opinió del

cardiòleg del donant.

Els antecedents d'extrasístoles o de palpitations aïllades no són motiu d'exclusió.

Els antecedents de fibril·lació auricular o ventricular poden ser motiu d'exclusió definitiva.

**ARTERITIS- ARTERIOPATIA**

Exclusió definitiva.

**ARTRITIS ESCAPULOHUMERAL**

No és motiu d'exclusió.

**ARTRITIS PSORIÀSICA**

Exclusió definitiva.

Veure Psoriasi

**ARTRITIS REUMATOIDEA**

Podran donar les persones amb un quadre lleu, que només requereixin tractament amb antiinflamatoris no esteroïdals, Sulfasalazina o Hydroxycloquina.

Si el quadre clínic és greu o forma part d'una alteració multisistèmica, s'exclourà definitivament.

**ARTRITIS REUMATOIDEA JUVENIL**

S'acceptaran com a donants quan hagin transcorregut 12 mesos de l'alta definitiva (curació).

**ARTROSIS**

No és motiu d'exclusió encara que segueixi tractament.

**ASMA**

Veure MALALTIES AL·LÈRGiques / DERMATOLÒGiques.

**ASSAIGS CLÍNICS**

Els donants que participen en un assaig clínic s'han d'excloure indefinidament fins l'acabament del mateix.

TÍTOL: CRITERIS PER ACCEPTAR / EXCLOURE ALS DONANTS DE SANG TOTAL I COMPONENTS SANGUINIS

AUTOIMMUNES

Veure MALALTIES AUTOIMMUNES

AVORTAMENT

- Exclusió durant 6 mesos, a comptar des de la data d'interrupció de l'embaràs, llevat de circumstàncies d'excepció i sempre a criteri mèdic.
- Si l'avortament s'ha produït en el 1r trimestre, excloure durant una setmana per cada setmana d'embaràs, sempre i quan la dona hagi tornat a la seva activitat normal i es trobi en bon estat de salut.

Veure EMBARÀS.

BABESIOSI

Exclusió definitiva.

BEHÇET

Veure MALALTIES AUTOIMMUNES

BETABLOQUEJANTS

Es pot acceptar sempre que el pols sigui superior a 60 batecs/minut.

La pressió arterial s'ha de trobar dins de límits normals en les persones que els prenen com hipotensors.

Veure HIPERTENSIÓ.

Exclusió indefinida quan s'utilitzen per al tractament de malaltia cardiovascular.

BORRELIOSI (Malaltia de Lyme) Pot acceptar-se després de la recuperació.

BRONCODILATADORS (Inhaladors)

Veure MALALTIES AL·LÈRGiques / DERMATOLÒGiques

BRONQUITIS AGUDA

Pot ser acceptat una vegada es trobi bé, i hagin transcorregut 14 dies o més sense tractament.

BRONQUITIS CRÒNICA

No s'acceptaran com a donants les persones que de forma habitual presenten atacs repetits de tos i expectoració, o que tinguin dispnea en repòs o amb mínims esforços.

BRUCEL·LOSI

Veure MALALTIES INFECCIOSES.

BUF ANORGÀNIC

No existeix motiu per no acceptar com a donant a una persona que diu tenir un «buf», i que, valorat per un cardiòleg, s'ha descartat l'existència de lesió orgànica.

BULÍMIA

Exclusió indefinida fins a recuperació dels hàbits normals.

CÀNCER

El tenir un alt risc de patir càncer, degut a antecedents familiars o a exàmens genètics, encara que s'hagi realitzat cirurgia o medicació profilàctica (ex: tamoxifè), no és motiu d'exclusió.

Encara que s'han descrit casos de transmissió de càncer per òrgans sòlids trasplantats, no es coneix cap cas de transmissió per transfusió. Tanmateix, és convenient recordar la sospita que certs virus podrien jugar un paper en el desenvolupament d'alguns tipus de neoplàsies. Per aquest motiu, s'exclou de manera definitiva els donants amb antecedents de neoplàsia.

Hi ha excepcions, amb exclusió indefinida mentre estigui en estudi o tractament, i sempre que no estiguin previstes altres terapèutiques, en els següents tumors:

### TÍTOL: CRITERIS PER ACCEPTAR / EXCLOURE ALS DONANTS DE SANG TOTAL I COMPONENTS SANGUINIS

- Carcinoma in situ de cèrvix (displàsia cervical).
- Carcinoma vulvar in situ.
- Tumors localitzats de pell (carcinoma basocel·lular i escamós), exclusió indefinida mentre estigui en estudi o tractament.

Alguns tumors sòlids, de la infantesa, com el neuroblastoma, el tumor de Wilms, i el retinoblastoma, es considera que han curat si les persones van ser diagnosticats abans dels 5 anys d'edat i no han recidivat posteriorment, i poden ser acceptades com donants. No es poden acceptar aquelles persones que van patir malalties del tipus leucèmia i/o limfoma, per la possibilitat de la intervenció de virus en la seva patogènia.

CANDIDIASI ORAL / VAGINAL  Si no està relacionada amb immunodeficiència no és motiu d'exclusió si el tractament és únicament local.

- Si el tractament és per via general ajornar la donació fins a l'acabament del mateix i sempre que el donant es trobi bé.
- Exclusió definitiva si està associada a immunodeficiència.

#### CANNABIS

Per si mateixa no exclou la donació.  
Veure DROGUES.

#### CANVI DE SEXE

Valorar per l'estil de vida si existeixen comportaments de risc.

Si no és així, pot acceptar-se.  
Cal aplicar el nivell d'hemoglobina del nou sexe adquirit.

En el cas de canvi de dona a home, cal

considerar-ho com dona a afectes d'utilització del plasma per a transfusió.

La medicació hormonal substitutiva no impedeix la donació.

#### CARDIOPATIA CONGÈNITA (CIA, CIV ETC.)

Poden acceptar-se com a donants aquelles persones que han estat intervingudes quirúrgicament i es troben bé, sense seqüeles.

#### CATÈTERS

- Els catèters endovenosos i els utilitzats per les anestèsies epidurals són d'un sol ús i no exclouen la donació.
- En els casos amb catèters de llarga duració i anticoagulació amb heparina, excloure durant 4 mesos, per la possibilitat de què s'utilitzi el mateix vial d'heparina o sèrum fisiològic per a diversos pacients i aquests puguin estar contaminats per restes de sang d'algun malalt portador del VHC o del VHB.
- Els catèters utilitzats per realitzar l'ablació cardíaca (Wolf Parkinson White) poden ser reutilitzables, el termini de temps que ha de transcórrer, quan la malaltia de base no contraindica la donació, serà de, 4 mesos.

#### CEFALEA

- No és motiu d'exclusió si és ocasional.
- Les persones amb cefalees de repetició poden ser acceptades si es coneix la seva causa i aquesta no contraindica la donació.

Veure MIGRANYA.

TÍTOL: CRITERIS PER ACCEPTAR / EXCLOURE ALS DONANTS DE SANG TOTAL I COMPONENTS SANGUINIS

CEGUESA

No és contraindicació. L'entrevista s'ha de realitzar de forma oral, assegurant-se que el candidat entén les preguntes.

CELIAQUIA

S'ha d'acceptar, si es troba bé.

CHAGAS, malaltia de

Veure TRIPANOSOMIASI.

CHICUNGUNYA, febre de

Exclusió fins 6 mesos després de la curació.

CIRROSI HEPÀTICA

Exclusió definitiva.

CIRURGIA MAJOR I MENOR

- Cirurgia Major: l'acceptació com a donant d'una persona amb antecedents quirúrgics dependrà del motiu pel qual va ser intervinguda, i del temps transcorregut des de la intervenció.

El termini de temps que ha de transcórrer, quan la malaltia de base no contraindica la donació, serà de, almenys 4 mesos, sempre que el donant es trobi bé i hagi reprès la seva activitat normal.

No són acceptables com a donants aquells que han estat sotmesos a cirurgia per neoplàsia o lesions cardíques, excepte en aquest últim cas, si es tracta de la correcció d'una cardiopatia congènita reparada sense seqüeles.

Si el donant té programada una intervenció quirúrgica sagnant, per un procés que no contraindica la donació (pròtesi maluc o genoll, intervenció per

escoliosi o liposucció abdominal), és aconsellable que hi hagi un mínim de 2 mesos, des de la donació a la data de la intervenció.

- Cirurgia Menor: exclusió fins al total restabliment i inici de l'activitat habitual, amb un mínim de 7 dies (sutura de ferides, amigdalectomia, extirpació de lesions cutànies, hemorroïdectomia, cirurgia dental, varius, hèrnies, etc.).

CISTITIS

Veure INFECCIÓ.

CLAUDICACIÓ INTERMITENT

- Exclusió indefinida, fins la resolució.
- Podran donar els malalts tractats amb "stent" que no precisin tractament anticoagulant ni antiagregant i estiguin lliures de simptomatologia.

CLOMIFÈ (Omifin®)

Es tracta d'un estimulant sintètic de l'ovulació.

Exclusió fins 3 mesos després de l'última dosi.

Veure INFERTILITAT.

COCAÏNA

Per si mateixa no és motiu d'exclusió. Veure DROGUES.

COL·LAGENOSI

Exclusió definitiva.

COL·LIRIS/GOTES OÏDA

Poden donar si la malaltia de base no contraindica la donació.

COLECISTITIS

Veure INFECCIÓ.

TÍTOL: CRITERIS PER ACCEPTAR / EXCLOURE ALS DONANTS DE SANG TOTAL I COMPONENTS SANGUINIS

han estat exposats en l'actualitat ja que se'ls suposa immunes.

COLESTEROL ELEVAT

La presa de medicació per a baixar la xifra de colesterol no contraindica la donació.

Veure HIPERCOLESTEROLÈMIA.

CÒLIC NEFRÍTIC

Es pot acceptar una vegada hagi cedit la simptomatologia i el donant es trobi bé.

Exclusió temporal mentre es realitzen els estudis per aclarir la causa.

COLITIS INFECCIOSA

S'han d'acceptar una vegada recuperats de l'episodi infeccios.

COLITIS ULCEROSA

Exclusió indefinida fins la desaparició de la simptomatologia.

CÒLON IRRITABLE

No és causa d'exclusió.

COLOSTOMIA

Acceptar si el motiu de la colostomia no exclou la donació.

Exclusió definitiva en cas de neoplàsia o de malaltia intestinal inflamatòria crònica com a malaltia de base.

Veure CIRURGIA MAJOR I MENOR

CONTACTE AMB PACIENTS AMB MALALTIES INFECCIOSES

- Els donants que recentment han estat en contacte amb pacients amb malalties infeccioses contagioses (varicel·la, parotiditis, xarampió etc.) han de ser exclosos durant el temps equivalent al període d'incubació i, si aquest no és conegut durant 4 setmanes.
- Poden acceptar-se els donants que van patir en el passat la malaltia a què

CONTACTE ESTRET AMB PACIENTS AMB HEPATITIS VIRAL

Per contacte estret es defineix: contacte sexual o convivència a la mateixa casa compartint cuina, dormitoris i lavabos.

- Hepatitis de causa desconeguda i Hepatitis A (aguda): exclusió durant 6 mesos de la curació de la malaltia, o de la fi de la convivència i de l'últim contacte sexual.
- Hepatitis B i Portadors confirmats de HBsAg: tant si el donant està vacunat de l'Hepatitis B, com si no, exclusió fins 4 mesos després de la fi de la convivència i de l'últim contacte sexual, tant si el donant està vacunat de l'Hepatitis B, com si no ho està.
- Hepatitis C i Portadors confirmats d'anti-VHC: exclusió fins 4 mesos de l'últim contacte sexual, encara que el malalt es considerés "curat".
- Hepatitis E: exclusió fins 6 mesos de la fi de la convivència i de l'últim contacte sexual.

CONTRACEPTIUS (anovulatoris, implants)

No són causa d'exclusió.

CONVULSIONS

Veure EPILÈPSIA.

COREA HUNTINGTON

Poden acceptar-se portadors sense símptomes, però no les persones afectes.

CÒRNIA / ESCLERÒTICA (trasplantament)

Veure EMPELTS.

TÍTOL: CRITERIS PER ACCEPTAR / EXCLOURE ALS DONANTS DE SANG TOTAL I COMPONENTS SANGUINIS

CORTICOIDES

- Via intra-articular, via tòpica o inhalats: no contraindiquen la donació. Aquests donants poden ser acceptats.
- Via oral/parenteral:
  - Si la malaltia de base no és motiu d'exclusió, diferir la donació fins a transcorreguts 7 dies de la fi del tractament.
  - Exclusió indefinida fins a 4 setmanes de la fi del tractament, si és habitual i de llarga durada, incloent ènemes, o cremes aplicades sobre gran part de la superfície corporal.
  - Exclusió definitiva si és tractament d'una malaltia multiorgànica, o d'artritis inflamatòria generalitzada.

CREUTZFELDT – JAKOB, malaltia de

Exclusió definitiva en cas de:

- En el passat (al nostre país es van utilitzar fins a 1987) han estat tractats amb extractes derivats de glàndules pituitàries humanes (hormona de creixement, gonadotropina), hagin rebut empelts de duramàter, de còrnia o d'escleròtica.
- L'existència d'antecedents familiars d'encefalopaties espongiformes transmissibles, malaltia de Creutzfeldt Jakob i variant de la malaltia de Creutzfeldt-Jakob
- Les persones que hagin viscut més de 12 mesos (sumant totes les estances) durant el període 1980-1996 al Regne Unit (Anglaterra, Gal·les, Escòcia, Irlanda del Nord, Illa de Man i Illes del Canal). La República d'Irlanda (Eire) no forma part del Regne Unit.
- Les persones que hagin estat transfosos en algun dels esmentats països i França posteriorment a 1980.

CROHN, malaltia de

Exclusió indefinida fins la desaparició de la simptomatologia.

DENGUE

Exclusió fins 6 mesos després de la curació.

DENTISTA

En existir risc de bacterièmia és necessari esperar fins que la ferida estigui curada, la qual cosa dependrà del tipus d'intervenció:

- Revisió: no exclou.
- Neteja: 24 hores. La presa d'antibiòtics profilàctics després de la neteja no exclou.
- Empastaments i endodòncies: 24-72 hores.
- Extracció dental simple i/o intervenció complexa: equival a cirurgia menor, exclusió fins a la curació de la ferida. Almenys 7 dies.
- Abscés (flegmó): exclusió fins a transcorreguts 14 dies des de l'acabament del tractament antibiòtic.
  - Implant de teixit ossi al·logènic o d'origen animal: Veure Empelt

DEPRESSIÓ

Veure MALALTIES PSIQUIÀTRIQUES.

DERMATITIS

Acceptar sempre que la zona afectada sigui petita, el lloc de punció estigui lliure de lesió, i el tractament sigui únicament tòpic.

DESCONGESTIONANTS NASALS

No contraindiquen la donació.

DIABETIS INSÍPIDA

Veure MALALTIES ENDOCRINOLÒGIQUES.

TÍTOL: CRITERIS PER ACCEPTAR / EXCLOURE ALS DONANTS DE SANG TOTAL I COMPONENTS SANGUINIS

DIABETIS MELLITUS

- Poden acceptar-se com a donants les persones amb diabetis no insulíndependent tractats amb dieta, amb medicació per via oral o injectable diferent de la insulina (Victoza ®, Byetta ®...) que es trobin bé, estiguin ben controlats i no presentin complicacions vasculars a conseqüència de la malaltia.
- L'exclusió serà definitiva si la diabetis és insulíndependent.
- No esclou l'antecedent d'un episodi d'intolerància a la glucosa durant l'embaràs o mentre està sent tractat amb corticoides per una malaltia aguda.

DIARREA

Determinar la causa i acceptar una vegada el donant estigui recuperat.

Veure MALALTIES INFECCIOSES.

Exclusió indefinida, fins la curació si existeix malaltia intestinal inflamatòria crònica. (Veure la malaltia específica).

DIATESIS HEMORRÀGICA ANORMAL

Veure MALALTIES HEMATOLOÒGIQUES.

DIFTÈRIA

Exclusió indefinida, fins la curació

DIGOXINA

Exclusió definitiva.

DISENTERIA AMEBIANA

Veure AMEBIASI.

DISCAPACITAT PSÍQUICA I/O FÍSICA.

Per poder ser acceptat, hem d'evidenciar que el donant és capaç d'entendre tot el procés de la donació.

DIÜRÈTICS

Valorar el motiu pel qual es prenen, i decidir en conseqüència.

DIVERTICULOSI

No és motiu d'exclusió.

DOWN, síndrome de

Veure DISCAPACITAT PSÍQUICA I/O FÍSICA

DROGUES

- Drogues no injectables:
  - Els antecedents de drogues no injectables no necessàriament exclouen de la donació.
  - Les alteracions del comportament que produeixen les drogues poden fer les persones que les prenen més inclinades a experiències sexuals de risc, pel que en aquests potencials donants s'ha de fer, en l'entrevista personal, una meticulosa investigació sobre el seu comportament sexual abans d'acceptar la donació.
  - S'han d'excloure les persones que en el moment de la donació es trobin sota l'efecte d'alguna droga, inclòs l'alcohol. L'exclusió pot ser indefinida fins a la pròxima sessió, o definitiva si el seu comportament pot suposar perill per a la resta dels donants o del personal.
  - Si el donant està en període de desintoxicació exclou fins a 4 mesos de la fi del tractament.



TÍTOL: CRITERIS PER ACCEPTAR / EXCLOURE ALS DONANTS DE SANG TOTAL I COMPONENTS SANGUINIS

Drogues parenterals:

- És exclusió definitiva de la donació els antecedents de drogoaddicció per via intravenosa, subcutània, intramuscular i qualsevol altre ús d'agulles per a l'administració de drogues, esteroides o altres productes no prescrits per un metge.

DUODENITIS

No és motiu d'exclusió.

ÈCZEMA

Es pot acceptar si l'àrea és petita, no afecta a la zona de venipunció, i necessita només tractament local.

L'eczema de contacte crònic no és motiu d'exclusió. Ajornar l'extracció només si hi ha lesions a la zona de punció.

EBOLA, malaltia d'

- Exclusió definitiva.
- Les persones amb possible exposició al virus Ebola, per contacte amb pacients amb malaltia d'Ebola, s'exclouran per un període de 2 mesos des de la finalització del contacte, sempre que el donant estigui asimptomàtic.

EDEMA DE QUINCKE

- Ajornar l'extracció 1 mes.
- Si es produeix després de l'administració d'un medicament l'exclusió es prolongarà fins a 12 mesos.

ELECTRÒLISI (Electròlisi percutània tissular)

No és motiu d'exclusió.

EMBARÀS

- Les dones embarassades no han de donar sang, donada la seva major necessitat de ferro. Exclusió fins 6 mesos del part com a mínim.
- La lactància després d'aquest període no exclou la donació.
- En cas de mola hidatidiforme:
  - Si és invasiva (maligna). Exclusió definitiva.
  - Si no és maligna: excloure indefinidament fins que la dona sigui donada d'alta definitiva.

EMFISEMA PULMONAR

Exclusió definitiva.

EMPELTS

- Excloure definitivament:
  - Les persones que en el passat han estat tractats amb extractes derivats de glàndules pituïtàries humanes o hagin rebut empelts de duramàter, còrnia o escleròtica.
  - Les persones que han rebut xenotrasplants (trasplants d'origen animal), teixit ossi d'origen boví molt utilitzat per odontòlegs.
  - Les persones que han rebut xenotrasplants. En aquests tipus de tractament s'inclou qualsevol procediment que impliqui el trasplantament, implantació o infusió en un humà d'alguna de les dues categories de productes:
    - o Cèl·lules vives, teixits o òrgans d'un animal no humà.
    - o Fluids corporals, cèl·lules, teixits o òrgans que han tingut contacte ex viu amb les cèl·lules vives, teixits o òrgans d'animals no humans.

## TÍTOL: CRITERIS PER ACCEPTAR / EXCLOURE ALS DONANTS DE SANG TOTAL I COMPONENTS SANGUINIS

Veure CREUTZFELDT - JAKOB.

Els productes de xenotrasplantament són: òrgans, teixits i cèl·lules vives.

No s'inclou:

- o Els productes biològics, medicaments o dispositius mèdics provinents de cèl·lules, teixits o òrgans no vius d'animals no humans, com per exemple la insulina porcina, les vàlvules cardíaques porcines i la matriu de col·lagen porcí acèl·lular (ejem: PelviSoft®, Bio-Oss®, Bio-Gide® i Surgibone®)
- o No es consideren productes de xenotrasplant les mossegades i picades d'animals.

Així serà exclusió definitiva si el material viu d'un animal no humà ha estat en contacte, directa o indirectament (veure paràgraf "s'inclou"), amb la sang del donant. L'exposició a material d'animals no humans, especialment quan la persona exposada està immunosuprimida, pot resultar en infeccions inusuals, que normalment no afectarien a les persones, i podria encomanar-se als receptors.

- Exclusió durant 4 mesos: Si han rebut altres tipus d'empelts de teixits o el trasplantament de cèl·lules d'origen humà (ossi, pell, tendons, etc.), si la malaltia de base permet donar.

### ENCEFALITIS

- Les produïdes per picadures de certs artròpodes i les secundàries a vacunacions exigeixen ajornar la donació fins 2 anys després de la curació.
- Les encefalitis causades per virus són motiu d'exclusió definitiva.

### ENCEFALOPATIA ESPONGIFORME

### ENDOCARDITIS

Exclusió definitiva.

### ENDOMETRIOSI

No és motiu d'exclusió.

### ENDOSCÒPIA

Veure EXPLORACIONS MÈDIQUES.

### EPILEPSIA

- Poden acceptar-se els donants amb història d'epilèpsia, que en els últims 3 anys no hagin tingut crisi ni requereixin tractament amb anticonvulsivants.
- Amb tractament continuat, exclusió indefinida fins a la resolució de la malaltia.
- Els antecedents de síncope o convulsions en la infantesa o adolescència no són motiu d'exclusió.
- S'han de descartar definitivament per a la donació les persones amb episodis convulsius no etiquetats, estiguin o no sotmesos a tractament.

### EPISODIS REPETITS DE SÍNCOPE

Veure PÉRDUDA DE CONEIXEMENT.

Veure EPILEPSIA.

ERITEMA (NODÓS I POLIMORF) Ajornar l'extracció fins que hagin transcorregut més de 6 mesos de la curació.

### ERITRODÈRMIA

Ajornar l'extracció fins 6 mesos després de la curació.

### ESCLEROSI MÚLTIPLE / ESCLEROSI LATERAL AMIOTRÓFICA

Exclusió definitiva.

## TÍTOL: CRITERIS PER ACCEPTAR / EXCLOURE ALS DONANTS DE SANG TOTAL I COMPONENTS SANGUINIS

### ESPLENECTOMIA

- Exclusió definitiva: En cas de neoplàsia, síndrome mieloproliferatiu, anèmia/trombocitopènia autoimmune. Altres causes: valorar etiologia.
- Si és secundària a un traumatisme s'acceptarà després de la recuperació.

Veure CIRURGIA MAJOR.

### ESPONDILITIS ANQUILOSANT

Exclusió definitiva si existeix afectació del sistema cardiovascular.

- Poden acceptar-se donants amb espondilitis anquilosant lleu, que només afecta el sistema locomotor.

### ESQUISTOSOMIAS

Exclusió fins 2 anys després de la curació.

### ESTEATOSIS HEPÀTICA

Veure MALALTIES GASTROINTESTINALS.

### ESTUDI MÈDIC

Els donants sotmesos a estudis mèdics, o en llista d'espera han de ser valorats individualment. Si el problema de salut que pateixen no és motiu de contraindicació per a la donació poden ser acceptats.

Avisar que han d'advertir al metge que els hi fa el seguiment que han fet una donació de sang perquè pugui valorar millor els resultats analítics, pot haver un descens de la hemoglobina.

### EXPLORACIONS MÈDIQUES

Independentment del motiu pel que es realitzen les exploracions (que també s'ha de tenir en compte) el risc és la transmissió viral, principalment del VHC, encara que els casos descrits estaven relacionats amb endoscòpies digestives amb biòpsia, per precaució, l'exclusió temporal es fa

extensiva a tot tipus d'endoscòpies.

- Els exàmens endoscòpics realitzats amb instruments rígids (cistoscòpies, colposcòpies, rectoscòpies, algunes artroscòpies,...) exclouen 7 dies.
- Els realitzats amb instruments flexibles exclouen de la donació durant 4 mesos.

### EXPOSICIÓ ACCIDENTAL A SANG I/O INSTRUMENTS CONTAMINATS AMB SANG

- La punció accidental amb material contaminat de sang o altres líquids humans provinents d'un pacient, o l'exposició de mucoses o conjuntiva a aquests productes, exigeix l'exclusió del donant durant 4 mesos.
- S'exclouran durant 1 any els donants que després d'una exposició de risc hagin rebut immunoglobulina específica antihepatitis B.

### EXTRACCIÓ DENTAL

Veure DENTISTA.

### FARINGITIS

Veure INFECCIÓ.

### FATIGA CRÒNICA

El diagnòstic de fatiga crònica no és motiu d'exclusió sempre que el donant sigui capaç de portar una activitat diària normal. (No s'ha relacionat amb etiologia vírica)

### FEBRE > 38°C

- Un quadre de febre igual o superior a 38°C associat a una síndrome gripal (miàlgies, cefalea, astènia, etc.) és motiu de diferir l'extracció fins transcorregudes 2 setmanes de la cessació dels símptomes.
- L'existència de temperatura superior a 38°C, amb afectació important de l'estat general i de durada superior a

TÍTOL: CRITERIS PER ACCEPTAR / EXCLOURE ALS DONANTS DE SANG TOTAL I COMPONENTS SANGUINIS

dos/tres setmanes, l'etiologia de les quals no hagi pogut ser establerta malgrat les anàlisis i exploracions realitzades, aconsella diferir la donació fins 12 mesos després de la curació.

FEBRE AFTOSA

Exclusió fins 15 dies després de la curació.

FEBRE DEL FENC (HENO)

No és motiu d'exclusió, encara que el donant estigui prenent antihistamínics o presenti simptomatologia. Si rep injeccions de dessensibilització es pot acceptar si es troba bé.

FEBRE D'ORIGEN GRIPAL

Veure GRIP.

FEBRE DE MALTA

Veure BRUCEL·LOSI.

FEBRE Q

Veure MALALTIES INFECCIOSES

FEBRE RECURRENT

Exclusió fins 2 anys després de la curació.

FEBRE REUMÀTICA

Exclusió fins 2 anys després de la curació i si no existeixen lesions cardíaques cròniques.

Veure MALALTIES CARDIOVASCULAS

Veure MALALTIES INFECCIOSES

FEBRE TIFOIDE

Exclusió fins 3 mesos després de la curació i finalització del tractament.

FERROTERÀPIA

Veure ANÈMIA .

FIBROMIÀLGIA

El diagnòstic de fibromiàlgia no és motiu d'exclusió sempre que el donant sigui capaç de portar una activitat diària normal (no s'ha relacionat amb etiologia vírica).

FILARIOSI

Exclusió fins 1 any després de la curació.

FINASTERIDE (PROSCAR®),  
PROPECIA®, FINASTERIDA®,  
ATIVOL®, EUCOPROST®)

Diferir la donació fins 1 mes després de l'acabament del tractament.

FLEBITIS

La flebitis aïllada, superficial o profunda, no és motiu d'exclusió, sempre que el donant estigui asimptomàtic i sense tractament anticoagulant.

FLEGMÓ DENTAL

Veure DENTISTA.

FRACTURES ÒSSIES

Ajornar l'extracció fins que el donant es trobi bé, i hagi reprès l'activitat habitual.

Veure ACCIDENTS.

FURÓNCOL

Veure INFECCIÓ.

GAMMAGLOBULINES

Veure IMMUNOGLOBULINES.

GASTRECTOMIA

Exclusió definitiva si el motiu és una neoplàsia, o en cas de gastrectomia total.

Veure CIRURGIA MAJOR.

GASTRITIS

Exclusió indefinida fins a la curació, en cas de presentar simptomatologia important.

TÍTOL: CRITERIS PER ACCEPTAR / EXCLOURE ALS DONANTS DE SANG TOTAL I COMPONENTS SANGUINIS

Veure INFECCIÓ i FEBRE >38°C

Acceptar si el donant té símptomes que són alleugerits per l'ús regular o esporàdic de medicació.

GUILLAIN-BARRÉ, síndrome de

Exclusió definitiva.

GASTROENTERITIS

Veure DIARREA.

GIARDIASI

Veure INFECCIÓ.

GILBERT, síndrome de

Acceptar excepte que el donant presenti icterícia clara.

HEMOCROMATOSIS

La malaltia en si mateixa no exclou de la donació. Per això, les persones que la pateixen poden ser acceptades si:

- Compleixen els criteris exigits per a la donació altruista. I
- Estiguin en la fase de manteniment amb extraccions separades més de dos mesos.

GLAUCOMA

- Agut: Excloure fins la seva estabilització.
- Crònic: Acceptar si:
  - Tractament amb col·liris.
  - Tractament amb betabloquejants si el pols és superior a 60 pulsacions/min.

Per tan es descarten en la fase inicial del tractament en la que son sotmesos a una alta freqüència d'extracció per baixar la ferritina

HEMORROIDES

Acceptable si és asimptomàtic o les molèsties són mínimes.

GLOMERULONEFRITIS

- Aguda: Excloure fins 5 anys després de la curació.
- Crònica: Exclusió definitiva.

Exclusió indefinida fins a la cessació de la simptomatologia i les pèrdues sanguínies.

HEPATITIS

L'hepatitis té diferents etiologies entre les quals s'inclouen les infeccions virals i la hipersensibilitat a certs medicaments:  Vírica: Veure HEPATITIS VÍRICA.

GONORREA

Excloure fins 12 mesos després de finalitzar el tractament.

- Tòxica: Exclusió indefinida fins que el donant hagi reprès la seva activitat habitual

Veure MALALTIES VENÈRIES.

GOTA

No és motiu d'exclusió, encara que estigui en tractament.

- Alcohòlica: exclusió definitiva.

Crònica: exclusió definitiva.

Esteatosis: Pot acceptar-se.

GRANULOMA INGUINAL

Exclusió definitiva.

GRIP

Exclusió fins 2 setmanes després de la curació.

HEPATITIS VÍRICA

1. Hepatitis de causa desconeguda: 1.1. Antecedents d'hepatitis abans de l'adolescència: acceptar si no hi ha alguna altra contraindicació.

## TÍTOL: CRITERIS PER ACCEPTAR / EXCLOURE ALS DONANTS DE SANG TOTAL I COMPONENTS SANGUINIS

1.2. Antecedents d'hepatitis, no B i no C, després de l'adolescència: acceptar si han transcorregut més de 2 anys des de la curació.

2. Hepatitis A:  
Excloure fins 6 mesos després de la curació.

3. Hepatitis B:  
3.1. Portadors crònics (HBsAg): exclusió definitiva.

3.2. Antecedents d'infecció per VHB: exclusió definitiva.

3.3. Les persones que hagin rebut gammaglobulina específica antihepatitis B no poden donar sang fins al cap de 12 mesos si l'administració és secundària a una exposició.

4. Hepatitis C:  
4.1. Portadors crònics (anticossos antVHC): exclusió definitiva.

4.2. Antecedents d'infecció passada serològicament demostrada: exclusió definitiva.

5. Hepatitis E:  
Excloure fins a 1 any després de la curació.

6. Hepatitis per EBV (Epstein Barr):  
Exclusió fins 6 mesos després de la curació.

7. Hepatitis per CMV (Citomegalovirus):  
Exclusió fins 6 mesos després de la curació.

8. Persones amb contacte estret amb pacients amb hepatitis viral  
Veure CONTACTE ESTRET AMB PACIENTS AMB HEPATITIS VIRAL

9. Transfusió de sang o de components sanguinis.  
Veure TRANSFUSIONS.

10. També s'exclouran de la donació

durant un període de, almenys 4 mesos, a comptar des de la data de l'última exposició, les persones que hagin: - Fet tractaments amb acupuntura, amb material que no és d'un sol ús.

- Fet perforacions de la pell o les mucoses (pírcing) o realitzat tatuatges amb estris que no siguin d'un sol ús. Veure TATUATGES I PERFORACIONS

- Estat exposades accidentalment a sang o instruments contaminats amb sang (exposició de mucoses o lesions cruentes per punció, incisió, etc.).

- Compartit xeringues o altres estris d'injecció.

- Estat sotmeses a exàmens endoscòpics (colonoscòpia, etc.) amb endoscòpis flexibles.

- Rebut tractament/exploracions que impliquin la utilització de catèters centrals col·locats durant diversos dies.

- Estat sotmesos a una intervenció quirúrgica major.

- Rebut un trasplantament de cèl·lules o teixits d'origen humà.

(Veure apartats corresponents on s'exposa cada punt amb més detall).

### HÈRNIA HIATUS

Habitualment el donant presenta una simptomatologia tolerable i pot ser acceptat.

Si la simptomatologia és important i persistent a pesar del tractament, exclusió indefinida fins la millora de la simptomatologia.

### HERPES GENITAL

Acceptar quan les lesions estiguin en procés de curació i el donant ja no prengui tractament, sempre que no existeixin

## TÍTOL: CRITERIS PER ACCEPTAR / EXCLOURE ALS DONANTS DE SANG TOTAL I COMPONENTS SANGUINIS

antecedents de malaltia de transmissió sexual.

### HERPES LABIAL

No és motiu d'exclusió.

### HERPES SIMPLE (Altres localitzacions)

Ajornar l'extracció fins que la lesió comenci el procés de curació.

### HERPES ZOSTER

Ajornar l'extracció fins a la recuperació.

### HIPERCOLESTEROLÈMIA / HIPERLIPIDÈMIA ESSENCIAL

- Pot ser acceptat si no presenta complicacions (trastorns visuals, neurològics o cardiovasculars), encara que estigui sota tractament.

Recordar que l'aspecte lletós del plasma pot interferir en les proves d'escrutini de marcadors i contraindica la donació per afèresis.

- Exclusió definitiva si presenta malaltia cardiovascular u altra alteració associada.

### HIPERPARATIROIDISME (TRACTAT)

No és motiu d'exclusió.

### HIPERTENSIÓ ARTERIAL

És aconsellable que, en el moment de la donació, la tensió sistòlica no sigui superior a 180 mmHg, i la diastòlica a 100 mmHg.

Poden donar les persones que presentin hipertensió lleu o moderada, ben controlades, sempre que la pressió diastòlica es mantingui per sota de 100 mmHg i sense efectes col·laterals secundaris a la medicació, especialment episodis d'hipotensió postural i símptomes cardiovasculars.

Per acceptar donants tractats amb betabloquejants (Sumial□, Blokium□, Tenormin□,...) és necessari que la dosi no hagi variat en les últimes 4 setmanes, la tensió arterial es mantingui dins dels límits establerts per a la donació i el pols sigui superior a 60 pulsacions/ minut.

### HIPERTIROÏDISME

Veure MALALTIES TIROIDALS.

### HIPNÒTICS

No contraindiquen la donació.

### HIPOTENSIÓ ARTERIAL

Les persones que refereixen ser hipotenses, poden ser acceptades com a donants si es troben be i no tenen síncope, ni marejos.

És aconsellable que la tensió sistòlica no sigui inferior a 90 mmHg, i la diastòlica a 50 mmHg, en el moment de la donació. En aquests casos és recomanable que el donant ingereixi líquids abans de la donació.

Veure PÈRDUA DE CONEIXEMENT

### HIPOTIROÏDISME

El tractament amb tiroxina no és motiu per excloure el donant.

Veure MALALTIES TIROIDALS.

### HISTERECTOMIA

Veure CIRURGIA.

### HOBBIES PERILLOSO

Veure PROFESSIÓ/AFICIONS DEL DONANT. pag 6

### HOMEOPATIA

El donant pot ser acceptat si la malaltia de base no contraindica la donació.

TÍTOL: CRITERIS PER ACCEPTAR / EXCLOURE ALS DONANTS DE SANG TOTAL I COMPONENTS SANGUINIS

HORMONAL (Tractament de reposició)

Acceptar si és per a tractament de símptomes menopàusics o prevenció de l'osteoporosi.

- Exclusió definitiva en cas de neoplàsia.

HORMONES PITUITÀRIES / HORMONA DEL CREIXEMENT

- Exclusió definitiva dels receptors d'hormones pituitàries d'origen humà (les administrades abans de 1987).
- Les persones que han rebut hormona recombinant poden ser acceptades.

HTLV-I/II

Els criteris d'exclusió són els mateixos que per a la infecció pel VIH/Sida.

Veure: SÍNDROME

D'IMMUNODEFICIÈNCIA ADQUIRIDA.

- L'antecedent d'infecció per aquests virus o de ser portador d'anticossos anti-HTLV-I/II exclou definitivament de la donació.
- Han de ser exclosos durant 4 mesos els potencials donants que han mantingut relacions sexuals amb persones infectades pel virus HTLV I/II.

ICTERÍCIA (Antecedents de)

És precís aclarir el motiu. Si va ser tòxica, per litiasis biliar, traumàtica o Síndrome de Gilbert, no exclou el donant.

Si va ser per hepatitis vírica veure HEPATITIS VÍRICA.

ICTIOSI

No és motiu d'exclusió sempre que la zona

de punció estigui lliure de lesió.

ILEOSTOMIA

Veure COLOSTOMIA.

IMMUNITZACIONS

Veure Vacunes.

IMMUNOGLOBULINES

- L'administració d'immunoglobulines és motiu d'exclusió durant 4 mesos.
- Si s'administren després d'una exposició coneguda a un agent infeccios, són motiu d'exclusió durant un període variable de temps, ja que poden prolongar el temps d'incubació:
  - Immunoglobulina antihepatitis B: exclusió durant 12 mesos
  - Antiràbica: 12 mesos.

INFART DE MIOCARDI

Exclusió definitiva.

INFECCIÓ

No s'inclouen en aquesta categoria ni les persones amb infecció micòtica superficial crònica amb tractament local, ni les que pateixen acne.

- Infecció Aguda: Poden acceptar-se donants amb història d'infeccions banals (que no ha necessitat tractament general amb antibiòtics) de vies respiratòries altes, com refredat comú, herpes labial, faringitis, laringitis etc. sempre que el donant es trobi bé i hagi reiniciat la seva activitat habitual.

Exclou aquells donants amb infecció aguda fins a la seva recuperació i passats uns 14 dies des de la interrupció del tractament antibiòtic, antifúngic o antiviral, sense recaigudes, marge que garanteix una curació total.  
Veure FEBRE > 38°C.



## TÍTOL: CRITERIS PER ACCEPTAR / EXCLOURE ALS DONANTS DE SANG TOTAL I COMPONENTS SANGUINIS

- Infecció crònica: exclusió definitiva de donants amb infecció crònica i repercussió clínica important.

Veure MALALTIES INFECCIOSES.

### INFECCIÓ URINÀRIA

Veure INFECCIÓ.

### INFERTILITAT (Tractament de la)

- Poden acceptar-se si han estat tractades només amb gonadotropines no pituitàries. Assegurar-se que no hi ha embaràs.
- Exclusió indefinida mentre es trobin en estudi i tractament.
- Exclusió durant 3 mesos a continuació d'un tractament amb clomifè.

### INHALADORS

Establir el motiu de la seva utilització i decidir basant-s'hi en ell.

### INJECCIONS

És valorarà la malaltia com a causa d'exclusió.

Si el material utilitzat no és d'un sol ús i la malaltia no és causa de rebuig per se, exclusió durant 4 mesos.

INJECCIONS DESENSIBILITZANTS No contraindiquen la donació si el donant està lliure de símptomes.

### INOCULACIÓ ACCIDENTAL

La punció accidental amb material contaminat de sang o altres líquids humans, provinent de pacient infectat o amb resultats desconeguts, exigeix l'exclusió durant 4 mesos, igual com si ha existit exposició de mucoses o conjuntiva a material contaminat.

Els donants que després d'exposició de risc al VHB hagin rebut immunoglobulina específica antihepatitis B, Veure IMMUNOGLOBULINES.

### IODE RADIACTIU

Veure MALATIES TIROÏDALS.

### ISOTRETINOÍNA (Roacutan)

Exclusió durant 1 mes després de finalitzar el tractament.

### KALA-AZAR (leishmaniosi visceral)

Exclusió definitiva.

Veure LEISMANIOSIS CUTÀNIA.

### KAPOSI

Exclusió definitiva.

### LARINGITIS

Veure INFECCIÓ.

### LÀSER (Tractament)

- Acceptar si la malaltia de base ho permet i l'àrea tractada és sana.
- Exclusió definitiva si el tractament és per malaltia neoplàsica (excepte carcinoma cervical in situ o carcinoma basocel·lular quan hagin estat donats d'alta definitiva). Veure CÀNCER

### LEGIONEL·LA

Exclusió indefinida fins a la curació.

### LEISHMANIOSI CUTÀNIA

Poden acceptar-se els donants amb antecedents de lesió aïllada si està ja curada.

Veure KALA-AZAR (leishmaniosi visceral)

### LEPRA

Exclusió definitiva.

TÍTOL: CRITERIS PER ACCEPTAR / EXCLOURE ALS DONANTS DE SANG TOTAL I COMPONENTS SANGUINIS

de la simptomatologia.

LEPTOSPIROSI

Ajornar fins a recuperació total.

LIMFOGRANULOMA VENERI

Exclusió definitiva.

LIPOTÍMIES / DESMAIS

La incidència d'aquest tipus de complicacions és molt més elevada en: - Donant de primera vegada.

- Donant amb antecedents de marejos en donacions prèvies.
- Donant nerviós, amb tensió arterial més alta de l'habitual en el moment de l'entrevista.
- Donant nerviós, que ve amb pressa i necessita sortir aviat a causa de les seves obligacions (anar a buscar els fills a l'escola, anar a esperar al familiar que surt de quiròfan o d'urgències....).

Tots aquests donants han de ser tractats com s'especifica al M-DI-EM-004 (Versió 1): Recomanacions per a la prevenció de pèrdues de coneixement en els donants de sang total. 2014.

Per precaució, pot ser aconsellable excloure els donants que en donacions prèvies van presentar més d'una reacció vaso-vagal greu o lipotímies consecutives.

LIQUEN PLA

Excloure fins transcorreguts 6 mesos de la curació.

LITI

Veure MALALTIES PSIQUIÀTRIQUES.

LITIASI BILIAR

- Si es troba bé, sense símptomes, no és motiu d'exclusió.
- Exclusió indefinida fins a la desaparició

MALALTIES AL·LÈRGIQUES

Síntomes respiratoris:

- Es poden acceptar com a donants els donants que han sofert recentment o presenten en el moment de la donació símptomes i signes d'al·lèrgia lleu (congestió nasal, coïssor d'ulls, tos seca etc.) i els que sofreixen d'asma però estiguin asimptomàtics en el moment de la donació, encara que estiguin amb tractament, sempre que aquest no sigui exclouent
- Malalts amb crisis respiratòries o altres manifestacions al·lèrgiques importants, no seran acceptats com a donants fins a 2 setmanes d'haver finalitzat el període de crisi i el tractament.

Síntomes dermatològics:

- No seran causa de rebuig trastorns moderats d'acne, psoriasi o rash al·lèrgic excepte quan afectin l'àrea de punció o hi hagi infecció sobre afegida.
- Els donants que presentin èczema local, urticària, o qualsevol altra lesió a la zona de punció venosa, seran exclosos de manera indefinida fins que la zona estigui totalment recuperada.
- Les persones que sofreixen Pèmfig o malalties atòpiques cròniques greus en tractament per via general (corticoides a dosis elevades i/o immunosupresors), seran excloses com a donants de forma indefinida fins a 12 mesos de la finalització del tractament.

Vacunes desensibilitzadores: Poden acceptar-se, si es troben bé.

Al·lèrgia al iode, al làtex o a l'òxid d'etilè: Els donants amb aquestes

## TÍTOL: CRITERIS PER ACCEPTAR / EXCLOURE ALS DONANTS DE SANG TOTAL I COMPONENTS SANGUINIS

al·lèrgies no han de ser exposats a les esmentades substàncies.

Veure AL·LERGIA ALIMENTARIA  
Veure AL·LERGIA A MEDICAMENTS

### MALALTIES AUTOIMMUNES

- Poden acceptar-se com a donants les persones amb malaltia autoimmuna que només afecta un òrgan, que portin més de 12 mesos sense tractament immunosupressor i es trobin bé en el moment de la donació.
- Exclusió definitiva de persones amb malaltia activa o multisistèmica (que afecta més d'un sistema orgànic) com: Lupus eritematós disseminat, esclerodèrmia, dermatomiositis, vasculitis, Sjögren, polimiàlgia reumàtica. etc.

Veure PSORIASI

MALALTIES CARDIOVASCULARS Les persones amb alteracions circulatòries són propenses a sofrir complicacions cardiovasculars i cerebrals a conseqüència de canvis hemodinàmics bruscos. S'ha de fer una valoració molt acurada dels antecedents de cardiopatia.

Les persones amb antecedents de malaltia cardíaca, especialment coronària, angina de pit, arítmia cardíaca greu, valvulopaties, història de malalties vasculars cerebrals, trombosi arterial o trombosi venosa recurrent han de quedar excloses definitivament.

En cas de dubte, és aconsellable demanar l'opinió al cardiòleg del donant.

Veure ANGINA DE PIT/INFART DE MIOCARDI.

### MALALTIES ENDOCRINOLÒGIQUES

Poden ser acceptades les persones amb

diabetis no insulíndependent, diabetis

insípida, malaltia metabòlica tiroide o paratiroide i patologia endocrina associada a tumors confirmats com a benignes (adenomes, feocromocitomes), excepte que presentin alguna complicació que impedeixin la donació.

Són motius d'exclusió definitiva la patologia endocrina deguda a tumor maligne, la diabetis insulíndependent i la insuficiència suprarenal.

Veure MALALTIES TIROÏDALS.

MALALTIES GASTROINTESTINALS Les patologies no infeccioses (úlceres pèptics, hèrnia hiatus, gastritis, còlon irritable, hemorroides, etc.) no exclouen de la donació, si el donant es troba bé i no hi ha cap altre motiu que la contraindiqui.

Les persones amb esteatosis poden ser acceptades com a donants, encara que, com és habitual, la xifra d'ALT sigui elevada.

Exclusió definitiva dels donants amb hepatopatia crònica, malaltia inflamatòria crònica (rectocolitis hemorràgica, etc.), pancreatitis crònica, síndromes de malabsorció amb repercussió clínica, neoplàsia, etc.

Es valorarà també l'exclusió de les persones amb tendència a ferropènia per mala absorció de ferro o pèrdues sanguínies.

Les persones amb malaltia celíaca controlada per dieta i amb patologia funcional poden ser acceptades.

### MALALTIES GENITOURINÀRIES

Infeccions agudes de l'aparell urinari (cistitis, pielonefritis): Veure INFECCIÓ.

## TÍTOL: CRITERIS PER ACCEPTAR / EXCLOURE ALS DONANTS DE SANG TOTAL I COMPONENTS SANGUINIS

- En les infeccions de l'aparell genital (uretritis, epididimitis, prostatitis, salpingitis, vaginitis, balanitis) també s'han de seguir els criteris establerts en INFECCIÓ, però és molt important tenir en compte que, en ocasions, el contagi és a través de relacions sexuals, per la qual cosa és necessari descartar prèviament un comportament sexual de risc. Si aquest es confirma, o no pot ser descartat amb suficient garantia, exclusió temporal durant, almenys, 4 mesos.
- Quist d'ovari: es pot acceptar si s'ha demostrat que no és neoplàsic.
- Hematúria: exclusió indefinida. El temps dependrà de la causa. En cas de neoplàsia, exclusió definitiva.
- Adenoma de pròstata: exclusió temporal dels tractats amb Finasteride (Proscar□) fins que hagi transcorregut 1 mes des de l'última presa. Els que estan sota tractament amb Dutasteride (Avidart□, Duagen□) exclusió de 6 mesos.

MALALTIES HEMATOLÒGIQUES Ja que l'objectiu de la transfusió sanguínia és substituir la sang perduda o defectuosa per sang sana, s'han d'excloure definitivament com a donants les persones amb qualsevol tipus de malaltia de la sang:

- Aplàsia
- Citopènies immunes
- Enzimopaties
- Hemoglobinopaties: A excepció de la Talassèmia Minor. Veure TALASSÈMIA.
- Leucèmies
- Limfomes
- Membranopaties eritrocitàries

- Mieloma i gammopaties monoclonals -
- Policitèmia Vera
- Síndromes mieloproliferatius

### MALALTIES HEMATOLÒGIQUES: COAGULOPATIES

- Ser portador d'una alteració congènita de la coagulació no necessàriament exclou de la donació. S'ha d'estudiar cada cas.
- En principi, poden acceptar-se aquelles persones que no presenten antecedents hemorràgics espontanis ni requereixen tractament amb factors de la coagulació, igual com les persones amb trombofília (incloent Factor V Leiden) si compleixen la resta dels criteris de selecció.
- Les persones amb antecedents d'hemorràgies que requereixen tractament amb factors de coagulació derivats de la sang s'exclouran de forma definitiva.
- Els donants que mantenen, o han mantingut relacions sexuals amb persones tractades amb factors de la coagulació d'origen humà han de ser exclosos fins, almenys, 4 mesos després de l'últim contacte sexual.
- Els donants amb història de púrpura trombocitopènica idiopàtica poden ser acceptats si el recompte plaquetari és normal sense tractament, han transcorregut més de 5 anys des de la curació, i no van requerir esplenectomia.

### MALALTIES INFECCIOSES

- En cas de Xarampió, Parotiditis, Rubèola, Varicel·la, Tos ferina, etc. exclou fins 4 setmanes després de la curació.

## TÍTOL: CRITERIS PER ACCEPTAR / EXCLOURE ALS DONANTS DE SANG TOTAL I COMPONENTS SANGUINIS

tendència bipolar exclusió indefinida fins a la recuperació.

- En cas de Mononucleosis Infecciosa, Toxoplasmòsi, l'exclusió serà de 6 mesos.
- La picadura o mossegada de paparres, pot transmetre malalties infeccioses, com la Malaltia de Lyme, la Febre tifoide, la Febre maculosa de les Montanyes Rocoses, l'Ehrlichiosis, la Babesiosi, per tant davant d'aquest antecedent, cal excloure durant 4 setmanes, per assegurar-se que no ha desenvolupat qualsevol d'aquestes malalties.
- S'exclouran fins 2 anys després de la curació, els donants amb antecedents de Tuberculosis, Brucel·losis (febre de Malta), Febre Q (serologia negativa), Febre reumàtica i Osteomielitis.
- Els antecedents d'hepatitis C, Hepatitis B, SIDA, Leishmaniosi visceral (Kala azar), Babesiosi, Malaltia de Chagas, i infecció per HTLV-I/II, suposarà l'exclusió definitiva.

Veure INFECCIÓ i FEBRE >38°C.

### MALALTIES METABÒLIQUES

Antecedents de malaltia de Wilson, amiloïdosi, o porfíria són motiu d'exclusió definitiva.

Veure HIPERLIPIDEMIES.

### MALALTIES PSIQUIÀTRIQUES

- Les persones en tractament amb antidepressius o liti poden ser acceptades si es troben bé.
- S'exclouran de manera indefinida fins a la recuperació, les persones amb quadre depressiu profund tractats amb neurolèptics.
- Si es té compromesa la capacitat d'entendre el procés de la donació o requereix control mèdic freqüent per la seva inestabilitat emocional o

### MALALTIES RENALS

- Una història de nefropatia auto limitada p.ex. pielitis o quadre únic de glomerulonefritis amb recuperació total, no suposa necessàriament exclusió. Les malformacions renals sense manifestacions clíniques no són excloents.
- L'existència de nefritis aguda aconsella excloure fins 5 anys des de la curació.
- L'existència de nefritis crònica exclou definitivament de la donació.

### MALALTIES RESPIRATÒRIES

Els donants amb malaltia respiratòria crònica greu han de ser exclosos de forma definitiva.

Malaltia respiratòria aguda: Veure INFECCIÓ i Febre >38°C.

### MALALTIES SISTEMA NERVIÓS CENTRAL

Com a norma general, un antecedent de malaltia greu del sistema nerviós central (SNC) exclou definitivament de la donació: demència, esclerosi múltiple, AVC, malalties neurodegeneratives, Creutzfeldt - Jakob, etc.

Existeix una àmplia varietat de malalties neurològiques i cada una d'elles requereix valoració individual, ja que podrien ser susceptibles de donar lloc a canvis hemodinàmics.

Les persones amb malalties neurològiques atrofiques o paralítiques manquen de to muscular a les seves cames i poden presentar major risc de reacció vasovagal.

Excloure definitivament les persones amb afectació vesical, ja que la possibilitat

## TÍTOL: CRITERIS PER ACCEPTAR / EXCLOURE ALS DONANTS DE SANG TOTAL I COMPONENTS SANGUINIS

d'infecció urinària és més alta i també aquells que pateixin malalties sospitoses de ser produïdes per virus o prions.

Veure EPILEPSIA.

### MALALTIES TIROÏDALS

- En cas de malaltia en estudi s'exclourà indefinidament fins a la resolució.
- Els donants amb hipotiroïdisme en tractament amb tiroxina poden acceptar-se per la donació.
- Si tractament amb iode radioactiu: exclusió fins 6 mesos des de la fi del tractament.
- Si el donant rep medicació antitiroïdal: exclusió fins 24 mesos després de la fi del tractament.
- En cas de neoplàsia o formant part d'una malaltia multisistèmica: exclusió definitiva.

### MALALTIES VENÈRIES O DE TRANSMISSIÓ SEXUAL

- Els donants amb antecedents de malaltia venèria (gonorrea, etc.) poden ser acceptats si ha transcorregut més d'1 any des de la curació, i sempre que en els últims 4 mesos no hagin tingut activitats sexuals considerades de risc.
- En cas de sífilis s'exclouran de manera definitiva ja que la serologia treponèmica (TPHA) sol persistir positiva durant molts anys. Tanmateix, un episodi de malaltia venèria és indicatiu d'inclinació a pràctiques de risc i pot ser motiu d'exclusió definitiva si existeixen dubtes sobre la sinceritat del donant.

Veure RELACIONS SEXUALS.

### MALÀRIA (Paludisme)

No existeixen casos de malaltia autòctona

al nostre país, i els casos actualment existents, són importats, en general com a conseqüència de:

- Viatges cada vegada més nombrosos a països on la malaltia és endèmica.
- El creixent moviment migratori, especialment en l'última dècada.
- Ser fill d'immigrants nascuts a Espanya i no immunitzats, que viatgen sense profilaxi al país d'origen dels seus pares. És en la població immigrant en la que cal incidir, i tenir en compte que alguns no recorden que han viatjat al seu país, o no li donen importància, en considerar-ho un fet normal.

Actuació:

- Les persones que hagin estat diagnosticades de paludisme queden excloses definitivament de la donació.
- Les persones que han viscut en algun país amb paludisme endèmic (encara que resideixi en una ciutat on no hi ha paludisme), per un període de 6 mesos o més, en qualsevol moment de la seva vida, s'exclouen 3 anys després de tornar de l'última visita a zona endèmica, sempre que estiguin lliures de símptomes.  
(Motiu: possibilitat de ser portadors asimptomàtics del paràsit).

- Les persones residents a zones no endèmiques que hagin visitat una zona considerada endèmica de paludisme, no es poden acceptar com a donants fins 6 mesos després de finalitzada l'estada a la zona endèmica i a condició que hagin estat lliures de simptomatologia suggestiva de paludisme. En aquest grup s'inclouen els fills d'immigrants que han nascut en el nostre país.

Només es podran acceptar si han viatjat a una àrea urbana concreta del

## MANUAL DE TÈCNiques

Data: 21 d'abril de 2017

Pàgina 38/80

### TÍTOL: CRITERIS PER ACCEPTAR / EXCLOURE ALS DONANTS DE SANG TOTAL I COMPONENTS SANGUINIS

país, on hi ha constància de no existència de risc especificada a l'Annex 1: Risc malalties transmissibles per països.

- Donat que no es pot diferenciar informàticament si la donació de plasma és per a transfusió o per a obtenció d'hemoderivats, no es podran admetre les persones residents en zona no endèmica de malària que hagin visitat una zona considerada endèmica abans dels 6 mesos de la seva tornada, per realitzar donació de plasma per a fraccionament industrial.
- Les persones amb antecedents d'afecció febril no diagnosticada durant una visita a zona endèmica o en els 6 mesos posteriors, s'exclouen durant 3 anys després de la desaparició de símptomes.

NOTA: Actualment al BST no es fan proves immunològiques o genòmiques per detectar la presència de Plasmodium. En el moment en què siguin aplicades aquestes tècniques, es podrà aplicar la reducció corresponent per cada un dels períodes d'exclusió, prèvia actualització d'aquest document.

Consultar: Annex 1: Risc malalties transmissibles per països.

MANTOUX (Prova de la Tuberculina) La positivitat o negativitat del test, per se, no condiciona la acceptació/exclusió de la donació.

- Exclusió fins llegida i interpretada la reacció i presa l'actitud terapèutica corresponent.
- Acceptar si no es preveuen nous estudis i no es fa profilaxis ni tractament
  - Si el malalt precisa de tractament

profilàctic s'exclourà fins passats 14 dies de la fi del tractament.

- Si s'inicia tractament per Tuberculosi: Veure TUBERCULOSI.

#### MARFAN, síndrome de

Acceptar si no hi ha complicacions cardíaques.

#### MASTOIDITIS

Veure INFECCIÓ.

#### MEDICAMENTS

En general, els medicaments que pren el donant no representen un risc pel receptor.

Només els donants tractats amb certs medicaments, especialment amb aquells que tenen propietats teratògenes o que alteren la funció plaquetària, en el cas de la donació de plaquetes per afèresi, han de ser exclosos temporalment, durant un període de temps que estarà en funció de les propietats farmacocinètiques del medicament.

En les altres situacions, l'exclusió per medicaments es basa més que en el fàrmac per se, en la naturalesa de la malaltia que requereix el tractament.

La pregunta que també a de fer la persona que entrevista al donant és: «¿PER QUÈ està prenent tal medicació?»

- La donació de sang està contraindicada en persones que prenguin els fàrmacs següents:
  - Antabús: exclou als donants de plasma/plaquetofèresi
  - Antiarrítmics
  - Antiepilèptics (com a tractament de l'epilèpsia)

### TÍTOL: CRITERIS PER ACCEPTAR / EXCLOURE ALS DONANTS DE SANG TOTAL I COMPONENTS SANGUINIS

- Citostàtics, immunosupressors -  
Digitàlics
  - Dilatadors coronaris
  - Heparina, anticoagulants orals -  
Insulina
  - $\beta$ -bloquejants, si la freqüència cardíaca és inferior a 60 pulsacions per minut
  - Els medicaments teratògens i el temps d'exclusió són:
    - Àcid Valproic (Depakine□, Àcid Valproic□): 1 mes.
    - Acitretina (Neotigasón□): 2 anys. -  
Ciclosporina (Closporil□, Sandimmune□, ...): 1 any.
    - Danazol (Danatrol□): 7 dies. -  
Dutasteride (Avidart□, Duagen□): 6 mesos.
    - Etosuximida (Etosuximida□): 2 mesos.
      - Etreinat (Tigason□): Definitiva. -  
Fenitoina (Fenitoina□): 2 mesos. -  
Fenobarbital (Gardenal□, Luminal□, Luminaletas□, Redutona□): 6 mesos.
    - Fenprocumon (Marcumar□): 6 mesos.
    - Finasteride (Proscar□, Propecia□, Finasterida□, Eucoprost□, Ativol□): 1 mes.
    - Hidroxicarbamida (Hidroxiurea□): 1 any.
    - Isotretinoïna (Roacután □, Isotretinoïna□, Isotrex□ Acnemin□, Acutaneo□, Dercutane□, Farmacine□, Isdiben□, Isoacné□, Isotrex□, Mayesta□): 1 mes.
    - Metotrexate (Metrotexato®): 12 mesos. Exclusió definitiva si es pren per malaltia neoplàsica.
  - Penicilamina (Cupripen□): 4 mesos. -  
Permixon (Serenoa Repens□): 1 mes.
  - Primidona (Mysoline□): 6 mesos. -  
Psoraleno (PUVAFotoquimioteràpia): 1 any.
  - Tamoxifè (Tamoxifeno□, Nolvadex□): 18 mesos. En cas de càncer de mama, exclusió definitiva.
  - Sals d'Or (Miocrin□, Ridaura□): 2 anys.
  - Warfarina (Aldocumar□): 2 mesos. La majoria de les persones que prenen aquests fàrmacs no acudirán a donar sang i, en cas que ho facin, seran exclosos per la malaltia de base.
    - Hormona del creixement fabricada de 1958 a 1986 (extracte de glàndula pituitària d'origen humà): Les persones que han rebut queden exclosos definitivament, per risc de malaltia de Creutzfeldt-Jakob.
    - Medicaments que impedeixen la donació de plaquetes: Aquests medicaments no contraindiquen la donació de sang total, en aquests casos cal indicar-ho per no fraccionar plaquetes, però si que s'ha d'excloure per la donació de plaquetoafèresi.
- Exclusió durant 5 dies:
- Ticlopidina (Tiklid□, Ticlopidina□ i Ticlodone□)
  - Clopidogrel (Plavix□, Iscover□)
- Exclusió durant 48 hores:
- Aceclofenaco (Airtal®, Falcol®, Gerbin®, Sanein®)
  - Acetaminic (Espledol®, Oldan®) -  
Àcid acetilsalicílic (A.A.S.®, Acido Acetilsalicílico®, Actrom® compuesto, Acyflox®, Adiro®, Aspirina®).



TÍTOL: CRITERIS PER ACCEPTAR / EXCLOURE ALS DONANTS DE SANG TOTAL I COMPONENTS SANGUINIS

- Àcid Mefenàmic (Coslan®) -
- Dexibuprofen (Atriscal®, Seractil®) -
- Diclofenac (Artrotec®, Di-retard®, Diclofenaco®, Dolo-nervobió®, Dolotren®, Luase®, Normulen®, Voltaren®)
- Diflunisal (Dolobid®)
- Fenilbutazona (Butazolidina®, Doctofril antiinflamatorio®)
- Flubiprofeno (Froben®, Neo-artrol®) -  
Ibuprofeno (Advil®, Alginasin®, Algidrin®, Alogesia®, Altior®, Babypiril®, Dalsy®, Diltix®, Doctril®, Dolorac®, Dorival®, Espidifen®, Feminalin®, Gelofeno®, Ibumac®, Ibuprofeno®, Ibuprox®, Isdol®, Junifen®, Neobrufen®, Nodolfen®, Norvectan®, Nurofen®, Pocyl®, Saetil®, Salvarina®)
- Indometacina (Aliviosin®, Artri Medical®, Artrinovo®, Fiacin®, Flogoter®, Inacid®, Indolgina®, Indonilo®, Mederreumol®, Neo decabutin®, Reumo-roger®, Reusin®)
- Ketoprofeno (Arcental®, Fastum®, Ketoprofeno®, Orudis®)
- Ketorololaco (Acular®, Algikey®, Droal®, Tonum®, Toradol®)
- Meloxicam (Movalis®, Parocin®, Uticox®).
- Nabumetona (Listran®, Relif®) -
- Naproxeno (Aleve®, Aliviomas®, Antalgin®, Denaxprem®, Lundiran®, Naproxyn®, Naproval®, Naproxeno®, Tacron®)
- Piroxicam (Artragil®, Brexinil®, Cycladol®, Doblelexan®, Feldene®, Improntal®, Pirixicam®, Salvacam®, Sasulem®, Vitaxicam®)
- Sulindaco (Sulindal®)
- Tenoxicam (Artriunic®, Reutenox®, Tilcotil®)

MELANOMA

Exclusió definitiva.

MENIÈRE, síndrome de

No és motiu d'exclusió.

MENINGITIS

No és causa d'exclusió si el donant està curat i ha reprès la seva activitat normal.

MENSTRUACIÓ

No contraindica la donació. Tanmateix, si la donant presenta molèsties importants, és convenient ajornar l'extracció fins al seu acabament.

MESOTERÀPIA

Veure ACUPUNTURA.

METOTREXATE

- Exclusió definitiva, si es pren per malaltia neoplàsica.
- Per la resta de prescripcions: exclusió fins 12 mesos després de la finalització del tractament.

MIASTÈNIA / MIOPATIA

Exclusió definitiva.

MICOSI FUNGOIDE

Exclusió definitiva.

MICOSI UNGUIALS

Veure INFECCIÓ.

MIGRANYA

- No acceptar durant la crisi, però sí fora de la mateixa.
- Acceptar si estan sota tractament profilàctic.
- Exclusió indefinida fins a recuperació, si les crisis són freqüents, greus i requereixen tractament regular,

## TÍTOL: CRITERIS PER ACCEPTAR / EXCLOURE ALS DONANTS DE SANG TOTAL I COMPONENTS SANGUINIS

incloent profilaxi amb betabloquejants, prednisona, etc.

### MOLA HIDATIDIFORME

- Excloure definitivament si és invasiva (maligna).
- Si no és així, exclusió indefinida fins l'alta definitiva.

### MONONUCLEOSI INFECCIOSA

Veure MALALTIES INFECCIOSES.

### MUSSOL

Veure INFECCIÓ.

### NEO-TIGASON

Veure ACITRETINA.

### NERVIOSISME

No és motiu d'exclusió. És molt freqüent que els donants, especialment els joves de primera vegada, estiguin nerviosos abans de la donació. La taquicàrdia i l'elevació de la pressió arterial sistòlica són habituals, i es normalitzen al cap d'uns minuts, quan el donant es tranquil·litza.

Les persones que atenen a aquest tipus de donants els han de dedicar una atenció especialment acurada, donant-li conversa i dissipant els seus temors, abans, durant i després de la donació.

### NEUROCIRURGIA

Valorar l'etiologia i l'existència o no de seqüeles post-quirúrgiques.

- Exclusió definitiva si no és possible confirmar que no es va utilitzar duramàter.
- La cirurgia sobre el raquis no suposa exclusió per si mateixa.

### NEUROFIBROMATOSI

- Exclusió definitiva si s'ha produït transformació maligna dels tumors que ocasiona aquest trastorn genètic del sistema nerviós.

- Es pot acceptar en absència de simptomatologia neurològica i cardíaca.

Veure EPILÈSIA.

Veure ARRÍTMIES (TRANSTORNS DEL RITME).

Veure HIPERTENSIÓ.

### OSTEOMIELITIS

Veure MALALTIES INFECCIOSES.

### OSTEOPOROSI PRIMÀRIA

Es pot acceptar si el donant es troba bé.

### PAGET (Malaltia òssia)

Acceptar si es troba bé, fins i tot, si està sotmès a tractament.

### PALUDISME

Veure MALÀRIA.

### PANCREATITIS

Exclusió indefinida fins a la curació total, valorant la seva etiologia abans de decidir.

### PAPILOMAVIRUS, Infecció

Acceptar si no hi cap simptomatologia i no s'evidencien pràctiques sexuals de risc.

### PARKINSON, malaltia de

Exclusió definitiva.

### PAROTIDITIS

Veure MALALTIES INFECCIOSES.

### PEGATS NICOTINA

Poden acceptar-se com a donants les persones que segueixen tractament de deshabitació al tabac.

TÍTOL: CRITERIS PER ACCEPTAR / EXCLOURE ALS DONANTS DE SANG TOTAL I COMPONENTS SANGUINIS

PÈMFIG

Veure MALALTIES AL·LÈRGiques / DERMATOLÒGiques

PÈRDUA DE CONEIXEMENT

- Les pèrdues de coneixement com a conseqüència de cops de calor, situacions d'estrès, etc... no contraindiquen la donació.
- Si la pèrdua de coneixement es va produir en una donació anterior, es valorarà acuradament les circumstàncies en les quals es va produir i, en cas de dubte, és prudent la seva exclusió.
- Si va ser com a conseqüència de traumatisme, ajornar l'extracció fins 2 mesos després de la curació. Exclusió definitiva si han quedat seqüeles neurològiques.
- Si la pèrdua de coneixement es va produir sense motiu evident, però es sospita una patologia neurològica o cardíaca, exclusió definitiva.

PERFORACIONS - PÍRCING (lòbul de l'orella, llavis, nas, etc.)

- Si la perforació s'ha realitzat amb material d'un sol ús, d'ús únic (com fan algunes farmàcies), no és motiu d'exclusió. Si el donant indica que el material (el pírcing) va ser extret d'un embalatge tancat pot acceptar-se que era d'ús únic.
- Exclusió durant 4 mesos si s'utilitza un altre material diferent i en cas de dubte.

PERIARTERITIS ESCAPULOHUMERAL

Poden donar.

PERICARDITIS

- Pericarditis viral o d'una altra etiologia sense seqüeles: exclusió durant 12 mesos.
- En cas de pericarditis tuberculosa excloure fins 2 anys després de la curació. Veure TUBERCULOSI

PERITONITIS

Veure INFECCIÓ.

PEU D'ATLETA

No és motiu d'exclusió si segueix tractament oral antifúngic

Veure INFECCIÓ

PIELITIS

Veure INFECCIÓ.

PIELONEFRITIS

- Aguda: Veure INFECCIÓ.
- Crònica: exclusió definitiva.

PÍRCING CORPORAL

Veure PERFORACIONS.

PITIRIASI VERSICOLOR

No exclou, sempre que la zona de punció estigui lliure de lesió.

PNEUMÒNIA

Veure INFECCIÓ.

PNEUMOTÒRAX

- La acceptació o no dependrà de l'etiologia.
- Si és espontani, es pot acceptar una vegada el donant hagi reprès la seva activitat normal.
  - Si s'associa a emfisema, exclusió definitiva.

TÍTOL: CRITERIS PER ACCEPTAR / EXCLOURE ALS DONANTS DE SANG TOTAL I COMPONENTS SANGUINIS

DONANT pàg. 6.

PROFILAXI ANTIPALÚDICA

Veure MALÀRIA.

PROSCAR<sup>®</sup> (FINASTERIDA)

Diferir la donació fins 1 mes després de l'acabament del tractament.

PSORIASI

- Acceptar si el quadre és lleu, la zona de venipunció està lliure de lesions i només segueix tractament tòpic.
- Exclusió indefinida fins a la recuperació, si les lesions cutànies són generalitzades i greus.
- Exclusió fins 12 mesos després de l'última dosi de tractament que pot afectar el sistema immune (PUVA, metotrexate, ciclosporina, hidroxycarbamida,...).
- Exclusió fins 2 anys després de l'última dosi de Acitretina (Neotigason<sup>®</sup>).
- Exclusió definitiva si s'ha tractat amb Etreinat (Tigason<sup>®</sup>) (ja no s'utilitza).

Veure MALATIES AUTOIMMUNES

PÚRPURA TROMBOCITOPÈNICA IDIOPÀTICA

Pot ser acceptat després de, almenys, 5 anys de la recuperació sempre que hagi estat donat d'alta definitiva o no hagi tingut recaigudes (aplicable tant a adults com a nens).

Veure MALALTIES HEMATOLÒGIQUES.

RAYNAUD, síndrome de

- Exclusió definitiva si forma part d'una malaltia multisistèmica.
- Si és per una altra causa, no és motiu d'exclusió.

POLICITÈMIA VERA

Exclusió definitiva.

POLIGLOBÚLIA

La acceptació o no dependrà de la malaltia de base.

Veure HEMOCROMATOSI,  
Veure MALALTIES RESPIRATÒRIES I  
CARDIOVASCULARS,  
Veure POLICITÈMIA VERA

En cas de no estar diagnosticat, excloure si Hb >18,5 g/l en homes i >15,5 g/l en dones, fins la seva tipificació.

POLIOMIELITIS

Els antecedents de pòlio, amb o sense seqüeles, no són motiu d'exclusió si ha transcorregut més d'1 any des de la curació.

POLIPOS

Si l'estat general és bo i no hi ha hagut hemorràgia recent poden ser acceptats com a donants.

PRESSIÓ ARTERIAL ALTA

Veure HIPERTENSIÓ.

PRESSIÓ ARTERIAL BAIXA

Veure HIPOTENSIÓ

PROCTITIS

Valorar la causa de la proctitis i el tractament administrat.

Veure COLITIS ULCEROSA  
Veure MALALTIA DE CROHN  
Veure HEMORROIDES

PROFESSIÓ DEL DONANT

Veure PROFESSIÓ/AFICIONS DEL

## TÍTOL: CRITERIS PER ACCEPTAR / EXCLOURE ALS DONANTS DE SANG TOTAL I COMPONENTS SANGUINIS

### REFREDAT COMÚ

Acceptar si el dia de la donació es troba

bé. Veure INFECCIÓ.

### REGNE UNIT (Estança)

Queden excloses definitivament les persones que hagin viscut al Regne Unit més de 12 mesos durant el període 1980-1996, de forma continuada o intermitent.

El Regne Unit està constituït per: Anglaterra, Gal·les, Escòcia, Irlanda del Nord, Illa de Man i Illes del Canal.

La República d'Irlanda (Eire) no forma part del Regne Unit.

### REITER, síndrome de

Exclusió definitiva.

### RELACIONS SEXUALS

S'inclouen dins d'aquesta accepció qualsevol de les activitats esmentades a continuació, encara que s'hagin dut a terme usant preservatiu o un altre tipus de protecció:

- Sexe vaginal (contacte entre penis i vagina).
- Sexe oral (boca o llengua en contacte amb vagina, penis o anus d'una altra persona).
- Sexe anal (contacte entre penis i anus).
- Ha de ser exclosa definitivament tota persona que ha exercit, o exerceix la prostitució (relacions sexuals a canvi de diners, droga o una altra contraprestació).
- Ha de ser exclosa durant 4 mesos comptats a partir de l'última relació tota persona que hagi mantingut relacions sexuals amb:
  - Diferents parelles del mateix o de diferent sexe de forma no estable (relacions sexuals promíscues).

- Una parella ocasional.
- Alguna persona portadora del virus de la SIDA (VIH) o HTLV I/II.
- Alguna persona que canvia freqüentment de parella.
  - Alguna persona que hagi pogut punxar-se drogues intravenoses.
- Alguna persona que exerceixi o hagi exercit la prostitució.
- Alguna persona que, en algun moment, ha estat diagnosticada d'Hepatitis C o B, encara que es consideri "curada". En el cas d'Hepatitis B, independentment de que el donant estigui vacunat o no, per a l' Hepatitis B.

- Les persones que hagin viatjat a països on es practica el "turisme sexual", han de ser acuradament interrogats per excloure pràctiques de risc.

### REUMATISME POLIARTICULAR AGUT

Veure FEBRE REUMÀTICA.

### RINITIS AL·LÈRGICA

La rinitis al·lèrgica simple no és motiu d'exclusió qualsevol que sigui el tractament antial·lèrgic.

### RUBÈOLA

Veure MALALTIES INFECCIOSES.

### SALMONEL·LOSI NO TIFOIDEA

Exclusió indefinida fins a la recuperació.

### SALPINGITIS

Veure INFECCIÓ.

### SARCOIDOSI

Malaltia de causa desconeguda en la que intervenen factors genètics i ambientals (virus, micobacteris...).

**TÍTOL: CRITERIS PER ACCEPTAR / EXCLOURE ALS DONANTS DE SANG TOTAL I COMPONENTS SANGUINIS**

les persones que han tingut relacions sexuals segons s'especifica a l'apartat: "RELACIONS SEXUALS".

- Excloure fins 5 anys després de la fi de la simptomatologia i de tot tractament.
- Exclusió definitiva en cas de patologia greu pulmonar o cardíaca associada.

**SÍNDROME TÒXIC PER OLI DE COLZA**

Exclusió definitiva.

**SEDACIÓ**

Veure ANESTÈSIA.

**TALASSÈMIA**

- MAYOR: Exclusió definitiva.
- MINOR: Poden donar si presenten una xifra d'hemoglobina normal.

**SÈZARY, síndrome de**

Exclusió definitiva.

**TAMOXIFÈ**

- Exclusió de 18 mesos des de l'acabament del tractament si no es tracta d'una neoplàsia (s'administra a dones amb història familiar de càncer de mama per a prevenció de la malaltia).
- Exclusió definitiva si és per tractar una neoplàsia.

**SÍFILIS**

Exclusió definitiva, ja que la serologia treponèmica (TPHA) sol persistir positiva durant molts anys.

**SÍNDROME DE DOWN**

Veure DISMINUÏTS PSÍQUICS

**TATUATGES**

No es poden acceptar donants amb tatuatges recents encara que hagin estat realitzats amb agulles estèrils i d'ús únic, ja que el perill resideix en utilitzar la mateixa tinta, sense canviar-la d'una persona a la següent. Només si hi ha garantia que les agulles i la tinta són d'ús únic podrà acceptar-se la donació.

Excloure durant 4 mesos els donants amb tatuatges no realitzats en les condicions abans esmentades. Tots aquests procediments són considerats de risc, perquè amb freqüència són realitzats en condicions poc higièniques, en locals inadequats, sense una correcta esterilització, amb reutilització de les agulles d'ús únic i tintes

Sempre que sigui possible es procurarà fer l'extracció de sang punxant en zones lliures de tatuatge. Si no és possible es pot fer la extracció, no és motiu d'exclusió.

**SÍNDROME D'IMMUNODEFICIÈNCIA ADQUIRIDA**

- Han de ser exclosos definitivament:
  - Les persones afectes de SIDA o portadores de l'anti-VIH.
  - Les persones que consumeixen o han consumit drogues per via endovenosa.
  - Les persones que, per modelar el cos, s'han injectat esteroides o altres fàrmacs, adquirits en llocs diferents a les farmàcies, amb prescripció mèdica o sense.
  - Les persones que exerceixen, o han exercit, la prostitució (entenen-se per tal el manteniment de relacions sexuals a canvi de diners, droga o qualsevol altra forma de retribució).
  - Malalts/es amb coagulopaties congènites tractats amb hemoderivats d'origen humà (factors de coagulació).
- Han de ser exclosos durant 4 mesos,

**TÍTOL: CRITERIS PER ACCEPTAR / EXCLOURE ALS DONANTS DE SANG TOTAL I COMPONENTS SANGUINIS**

data no estan excloses).

TINYA

Acceptar si és lleu, no afecta el lloc de la punció, i només rep tractament tòpic.

TOXINA BOTULÍNICA

Veure ACUPUNTURA

TOXOPLASMOSI

Veure MALALTIES INFECCIOSES.

TRACTAMENT MÈDIC

Si pel tractament ha estat necessària la col·locació d'un catèter o una via intravascular heparinitzada (p. ex. els utilitzats per a hemodiàlisis) s'ha d'excloure de la donació durant 4 mesos.

Veure CATÈTERS

TRANQUIL·LITZANTS

Veure ANSIOLÍTICS.

TRANSAMINASES ELEVADES

Veure MALALTIES GASTROINTESTINALS

TRANSFUSIÓ DE SANG O DERIVATS

S'han d'excloure durant 4 mesos les persones que hagin rebut una transfusió de sang o components en els següents països:

- Estats Units, Canadà, Nova Zelanda, Austràlia, Suïssa i Noruega.
  - Persones transfoses als següents països de la Comunitat Europea: Alemanya, Àustria, Bèlgica, Dinamarca, Irlanda (EIRE), Espanya, Finlàndia, Grècia, Holanda, Itàlia, Luxemburg, Malta, Portugal, Suècia.
- Exclusió definitiva:
- Persones que han rebut transfusió a Andorra, França i/o al Regne Unit posteriorment a 1980. (Persones transfoses amb anterioritat a aquesta

- Persones que han rebut transfusions en qualsevol altre país no inclòs en l'apartat anterior.

- En cas de donants homes amb antecedent de transfusió, la fracció plasmàtica no s'utilitzarà per ús transfusional com a prevenció del TRALI (Transfusion Related Acute Lung Injury), de la mateixa manera que tampoc serà per ús transfusional el plasma procedent de donants de sexe femení.

TRAQUEÏTIS

Veure INFECCIÓ.

TRASPLANTAMENT DE TEIXIT O

TRASPLANTAMENT CEL·LULAR Veure EMPELT.

TRAUMATISME MAJOR O MENOR

Exclusió indefinida fins que la recuperació sigui total.

- Exclusió de 4 mesos en cas d'haver requerit transfusió. Si hi ha dubte, o quan el traumatisme hagi estat molt greu, s'exclourà durant, almenys, 4 mesos.
- Exclusió definitiva si existeixen seqüeles neurològiques.

TRIPANOSOMIASI (M. de Chagas)

- Exclusió definitiva: Persones amb antecedents de malaltia de Chagas.
- Exclusió de 4 mesos: a la tornada d'un país d'àrea endèmica de Chagas. Consultar: Annex 1: Risc malalties transmissibles per països.
- S'ha de demanar la prova d'anticossos anti-Tripanosoma (Chagas) en els següents casos:

TÍTOL: CRITERIS PER ACCEPTAR / EXCLOURE ALS DONANTS DE SANG TOTAL I COMPONENTS SANGUINIS

TUMORS MALIGNES

Veure CÀNCER.

ÚLCERA GASTRODUODENAL No és motiu d'exclusió per si mateixa. Per això, poden acceptar-se com a donants les persones que no tenen història de sagnat recent per úlcera, i que no estiguin rebent tractament o bé aquest consisteixi, només, en antiàcids, protectors gàstrics (omeprazol@...) i dieta.

Si el donant presenta en el moment de la donació simptomatologia ulcerosa activa és millor ajornar l'extracció.

URETRITIS INESPECÍFICA

Aguda: Exclusió indefinida fins 14 dies després de la curació. Veure: INFECCIÓ.

Crònica: exclusió definitiva.

URTICÀRIA (Alimentària)

No és causa d'exclusió.

VACUNES

Vacunes desensibilitzants no són motiu d'exclusió, si el donant es troba bé.

Vacunes sintètiques o preparades de toxoides, gèrmens (bacteris, virus, rickettsies) morts o inactivats: no són motiu d'exclusió si el donant està afebril.

Vacunes de virus o bacteris atenuats: exclusió fins transcorregudes 4 setmanes.

Veure TAULA 1.

- Donant nascut o fill de mare nascuda en àrea endèmica de Chagas.

Nota: Si han donat sang després de 2005 ja la tindran feta. (Demandar-la si és la primera donació o si ha donat abans del 2005. Es pot consultar a eProgesa: Histórico de análisis 191 i 197).

Comprovar si ha viatjat a país endèmic amb posterioritat a la data de la determinació.

- Qualsevol persona, nascut en zona endèmica o no, que hagi viatjat a una zona endèmica i no disposi d'una determinació d'anticossos amb posterioritat al viatge.

La via habitual d'infecció és la picadura d'un insecte (xinxà) infectat, però també es pot transmetre per transfusió o trasplantament, i perinatalment de mare a fill. Aquesta última es produeix l'1-10% dels embarassos de mare infectada. En general, la via de transmissió més habitual en aquells països on no s'ha implantat l'escrutini sistemàtic de les donacions per detectar portadors de la malaltia, és la transfusió.

TROMBOSI ARTERIAL / VENOSA PROFUNDA

Exclusió definitiva si és recurrent, ha deixat seqüeles, necessita medicació anticoagulant o ho contraindica la malaltia de base.

TUBERCULOSI

Veure MALALTIES INFECCIOSES.

Veure MANTOUX.



TÍTOL: CRITERIS PER ACCEPTAR / EXCLOURE ALS DONANTS DE SANG TOTAL I COMPONENTS SANGUINIS

TAULA 1

VACUNA EXCLUSIÓ

|                                  |                                                                                                                                       |
|----------------------------------|---------------------------------------------------------------------------------------------------------------------------------------|
| Àntrax                           | Acceptar si es troba bé                                                                                                               |
| Catarrals - Gripals              | Acceptar si es troba bé                                                                                                               |
| Còlera                           | Acceptar si es troba bé                                                                                                               |
| Diftèries                        | Acceptar si es troba bé                                                                                                               |
| Encefalitis japonesa - inactivat | Acceptar si es troba bé                                                                                                               |
| Encefalitis japonesa - atenuat   | 4 setmanes (28 dies)                                                                                                                  |
| Encefalitis per paparra          | Acceptar si es troba bé                                                                                                               |
| Febre groga                      | 4 setmanes (28 dies)                                                                                                                  |
| Febre tifoide - oral             | 4 setmanes (28 dies)                                                                                                                  |
| Febre tifoide - injectable       | Acceptar si es troba bé                                                                                                               |
| Febre muntanyes rocalloses       | Acceptar si es troba bé                                                                                                               |
| Grip injectable                  | Acceptar si es troba bé                                                                                                               |
| Grip, intranasal                 | 4 setmanes (28 dies)                                                                                                                  |
| Haemophilus influenzae           | Acceptar si es troba bé                                                                                                               |
| Hepatitis A                      | Acceptar si es troba bé                                                                                                               |
| Hepatitis B                      | Esperar 15 dies i acceptar si es troba bé i no obeeix a una Gammaglobulina anti-hepatitis B 1 any. Administració per exposició prèvia |
| Meningococ                       | Acceptar si es troba bé                                                                                                               |
| Neumococ                         | Acceptar si es troba bé                                                                                                               |
| Parotiditis                      | 4 setmanes (28 dies)                                                                                                                  |
| Papil·loma                       | Acceptar si es troba bé                                                                                                               |
| Polio - oral                     | 4 setmanes (28 dies)                                                                                                                  |
| Polio - injectable               | Acceptar si es troba bé                                                                                                               |
| Ràbia                            | 1 any si després de mossegada. Si profilàctica acceptar si es troba bé                                                                |
| Refredat comú                    | Acceptar si es troba bé                                                                                                               |
| Rubèola                          | 4 setmanes (28 dies)                                                                                                                  |
| Sèrum animal                     | 3 mesos (antifoidi, ...)                                                                                                              |
| Tètanus                          | Acceptar si es troba bé                                                                                                               |
| Tifus exantemàtic                | Acceptar si es troba bé                                                                                                               |
| Tos ferina                       | Acceptar si es troba bé                                                                                                               |
| Tuberculosis                     | 4 setmanes (28 dies)                                                                                                                  |
| Varicel·la                       | 4 setmanes (28 dies)                                                                                                                  |
| Verola                           | 4 setmanes (28 dies)                                                                                                                  |
| Virus papil·loma humà            | Acceptar si es troba bé                                                                                                               |
| Xarampió                         | 4 setmanes (28 dies)                                                                                                                  |

TÍTOL: CRITERIS PER ACCEPTAR / EXCLOURE ALS DONANTS DE SANG TOTAL I COMPONENTS SANGUINIS

VALVULOPATIES

Exclusió definitiva.

VARICEL·LA

Veure MALALTIES INFECCIOSES.

VASODILATADORS CORONARIS

Exclusió definitiva.

VIATGES

Prestar especial atenció als comunicats d'alertes sanitàries en relació a la modificació dels criteris d'acceptació / exclusió de donants de sang.

Es publicaran i distribuiran, des de Qualitat, segons el procediment habitual com annex d'aquesta tècnica, i estaran publicats en el QDoc només durant la seva vigència.

Viatge dins d'Europa: no cal excloure.

Excepcions dins d'Europa:

- Geòrgia, Illes de Madeira: Exclusió d'1 mes des de la tornada, per prevenció de la transmissió de malalties infeccioses, com Dengue, Chicungunya.
- Grècia i Turquia: Exclusió segons l'època de l'any per risc de malària (Veure annex 1: Risc malalties transmissibles per països), la resta de l'any exclusió d'1 mes des de la tornada, per prevenció de la transmissió de malalties infeccioses, com Dengue, chicungunya.

Viatge fora d'Europa:

- Exclusió temporal d'1 mes des de la tornada, per prevenció de la transmissió de malalties infeccioses com Dengue, virus del Nil Occidental, virus SARS..., sempre que no hagin estat diagnosticat en aquest temps

d'alguna malaltia infecciosa.

- Les persones que hagin viatjat a zones on el SIDA és endèmic i a països on es practica el «Turisme sexual», han de ser acuradament interrogats per excloure pràctiques de risc. Aproximadament, un 3% dels viatgers adquireixen el VIH.

- Les persones que han viatjat a zona endèmica de malària, aplicar els criteris establerts a l'apartat Malària.

Veure MALÀRIA.

Veure RELACIONS SEXUALS.

Veure TRIPANOSOMIASI

VIH

Veure SÍNDROME

D'IMMUNODEFICIÈNCIA ADQUIRIDA.

VIRUS DEL NIL OCCIDENTAL En cas de malaltia excloure fins 6 mesos després de la curació.

En cas de viatge a zona on s'han enregistrat casos de transmissió de la malaltia en humans: Veure VIATGES.

VIRUS SARS

En cas de malaltia excloure fins 6 mesos després de la curació.

En cas de viatge a zona on s'han enregistrat casos de transmissió de la malaltia en humans: Veure VIATGES.

VITAMINES

La seva administració no exclou de la donació.

Els donants en tractament amb derivats de la vitamina A (Roacutan), potencialment teratògens, s'exclouran fins passat 1 mes de la fi del tractament.

TÍTOL: CRITERIS PER ACCEPTAR / EXCLOURE ALS DONANTS DE SANG TOTAL I  
COMPONENTS SANGUINIS

WILSON, malaltia de

Exclusió definitiva.

XENOTRASPLANT

Veure EMPELT.

WOLF PARKINSON WHITE

- És pot acceptar si el pols es troba entre 50 i 100 pulsacions i es detecten menys de 10 extrasístoles per minut.
- Acceptar si han estat sotmesos a una cardioversió/ablació i està donant d'alta.
- Els catèters utilitzats per realitzar l'ablació cardíaca (Wolf Parkinson White) poden ser reutilitzables, el termini de temps que ha de transcórrer, quan la malaltia de base no contraindica la donació, serà de 4 mesos.

Veure ARRITMIES (TRANSTORNS DEL RITME).

ZICA

Exclusió fins 4 mesos després de la curació

## MANUAL DE TÈCNiques

Data: 21 d'abril de 2017

Pàgina 51/80

### TÍTOL: CRITERIS PER ACCEPTAR / EXCLOURE ALS DONANTS DE SANG TOTAL I COMPONENTS SANGUINIS

#### 4.4. DONACIONS PER AFÈRESI

Excepte en la freqüència de donacions i la xifra d'hemoglobina, els donants per afèresi (eritrofèresis, plasmafèresis, plaquetofèresis, leucofèresis i multicomponents) han de complir els mateixos criteris que els donants de sang total.

Aquells que no els compleixin només seran sotmesos a afèresi quan la seva donació sigui d'especial valor per a un receptor, sempre per decisió del responsable de la unitat d'extracció.

Veure apartats:

#### 4.2. IDENTIFICACIÓ, EXPLORACIÓ I CONSIDERACIONS GENERALS DEL DONANT

#### 4.3. CRITERIS I CONDICIONS A CONSIDERAR, REFERENTS A MALALTIES O ANTECEDENTS.

##### 4.4.1. CRITERIS ESPECÍFICS PER A UNA PLASMAFÈRESI

(donacions de 600 ml de plasma i donacions de plaquetes més 400 ml de plasma)

##### ACCEPTACIÓ/EXCLUSIÓ

- A les plasmafèresis no s'acceptaran els donants amb dèficits de factors de coagulació, ni amb determinació d'anticossos irregulars positiva.
- Donat que no es pot diferenciar informàticament si la donació de plasma és per a transfusió o per a obtenció d'hemoderivats, no es podran admetre les persones residents en zona no endèmica de

malària que hagin visitat una zona considerada endèmica abans dels 6 mesos de la seva tornada, per realitzar donació de plasma per a fraccionament industrial.

##### ANALÍTICA

- Proteïnes:
  - A la primera donació es realitzaran les següents determinacions:
  - Dosificació de proteïnes sèriques totals. El valor ha de ser igual o superior a 6 g/dL).
  - Proteïnograma o dosificació de les immunoglobulines. No ha d'haver anomalies quantitatives ni qualitatives.
  - Hi ha d'haver control de les proteïnes totals, proteïnograma o dosificació d'immunoglobulines, cada 6 donacions o una vegada a l'any, que s'han de mantenir en els límits de la normalitat ja especificats. Cas que la xifra de proteïnes sigui inferior a 60 g/L o hi hagi un descens >10% en la quantitat de proteïnes o globulines, es suspendrà temporalment del programa de plasmafèresis, fins la seva recuperació.
- Hemoglobina: Es podran acceptar dones amb una Hb de 11,5 g/dL o superior i homes amb una Hb de 12,5 g/dL o superior, si aquestes són les seves xifres d'hemoglobina habituals.

##### FREQÜÈNCIA DE LES DONACIONS

La freqüència màxima serà d'una donació cada 2 setmanes. En circumstàncies especials, i sempre sota criteri mèdic, aquest temps pot ser més curt.

## TÍTOL: CRITERIS PER ACCEPTAR / EXCLOURE ALS DONANTS DE SANG TOTAL I COMPONENTS SANGUINIS

El nombre màxim d'extraccions anuals serà de 24, donat el volum màxim de plasma que es pot extreure en un any.

El interval entre una donació de plasma i una donació de sang total o donació de concentrat d'hematies per afèresis, amb o sense plasma, haurà de ser, al menys, de 48 hores.

### VOLUM D'EXTRACCIÓ

El volum de plasma extret per sessió no ha de sobrepassar els 600 mil·lilitres, en absència de reposició (sense comptar l'anticoagulant, és a dir, uns 650 mil·lilitres de plasma + anticoagulant), els 1.000 mil·lilitres en una setmana i els 15 litres en un any.

No es pot extreure més del 13% de la volèmia del donant, incloent els tubs per anàlisis.

Volums de referència:

- Sexe masculí: 60 Kg de pes, fins 546 ml; 70 Kg, fins 635ml.
- Sexe femení: 60 Kg, fins 507 ml; 70 Kg, fins 590 ml.

### 4.4.2. CRITERIS ESPECÍFICS PER A UNA PLAQUETOFÈRESI

Si s'acompanya d'extracció de més de 400 ml de plasma s'ha de complir també amb els criteris de l'apartat 4.4.1. CRITERIS ESPECÍFICS PER A UNA PLASMAFÈRESI

És Important prestar atenció a la ingesta de medicaments amb efecte

antiagregant.

Veure 4.3. Criteris i condicions a considerar, referents a malalties o antecedents / MEDICAMENTS.

### ANALÍTICA

- Plaquetes: Han de ser superior a 150.000.
- Hemoglobina: Es podran acceptar dones amb una Hb de 11,5 g/dL o superior i homes amb una Hb de 12,5 g/dL o superior, si aquestes són les seves xifres d'hemoglobina habituals.

### FREQÜÈNCIA DE LES DONACIONS

La freqüència màxima serà d'una donació cada 2 setmanes. En circumstàncies especials, i sempre sota criteri mèdic, aquest temps pot reduir se, fins un mínim de 2 dies, tenim en compte que en un període de 7 dies és pot realitzar un màxim de 2 donacions.

El nombre màxim d'extraccions anuals serà de 24.

L'interval entre una donació de plaquetes i una donació de sang total o donació de concentrat d'hematies per afèresis, amb o sense plasma, haurà de ser, al menys, de 48 hores.

### PLAQUETOFÈRESIS DIRIGIDES

Només s'acceptarà com a donació de plaquetoafèresi dirigida aquelles que per motius mèdics impliquin un donant específic per un receptor determinat. La indicació l'estableix el responsable mèdic de la unitat d'extracció, d'acord amb el responsable mèdic del servei de transfusió que va dirigida.

## TÍTOL: CRITERIS PER ACCEPTAR / EXCLOURE ALS DONANTS DE SANG TOTAL I COMPONENTS SANGUINIS

### 4.4.3. CRITERIS ESPECÍFICS PER A UNA DONACIÓ D'ERITRÒCITS: ERITROFÈRESI

#### VOLUM D'EXTRACCIÓ

La quantitat total d'eritrocits extrets no ha de superar la quantitat teòrica d'eritrocits que portaria l'hemoglobina del donant, en situació de normovolèmia, a un valor inferior a 110 g/L (per a seguretat del donant és convenient que no baixi d'aquesta concentració).

Per realitzar una donació de dues unitats d'eritrocits: el donant ha de tenir una volèmia superior a 5 L (pes donant >70 kg) i

#### ANALÍTICA

Hemoglobina: A de ser superior a 14,0 g/dL.

#### FREQÜÈNCIA DE LES DONACIONS

El interval entre 2 donacions d'1 unitat d'eritrocits per afèresi, 1 de sang total i 1 per afèresi, o viceversa, és el mateix que entre 2 donacions de sang total.

L'interval entre 1 donació de sang total i la donació de 2 unitats d'eritrocits per afèresi ha de ser almenys de 3 mesos.

L'interval entre 1 donació de 2 unitats d'eritrocits i 1 de sang total o una nova afèresi de 2 unitats d'eritrocits, ha de ser, almenys de 6 mesos.

El total d'eritrocits perduts en 1 any per un donant combinant els diferents tipus de donació (incloses les de sang total)

que pugui fer al llarg dels 12 mesos no ha de superar l'establert per als donants de sang total (equivalent a 4 donacions en homes i 3 en dones).

### 4.4.4. RELACIONS DE FREQUÈNCIA I VOLUM ENTRE LES DIFERENTS MODALITATS DE DONACIÓ (plasmafèresi, citafèresi, sang total)

- L'interval entre dos citafèresi (plaquetes, granulòcits i leucòcits) / plasmafèresi haurà de ser, d'1 procediment cada 15 dies. En circumstàncies especials el temps mínim per a les citoafèresi és 48 hores i un donant no ha de ser sotmès a més de 2 procediments en un període de 7 dies, i de 24 en 12 mesos.
- L'interval entre una plasmafèresi o plaquetoafèresi i una donació de sang total o d'una unitat d'eritrocits per afèresi (combinada o no amb plasma i/o plaquetes) ha de ser de, almenys, 48 hores. És recomanable esperar com a mínim 15 dies.
- L'interval entre una donació de moll de l'os i qualsevol donació (sang total, plasma, citafèresi) serà d'1 any. En circumstàncies especials, segons criteri mèdic del responsable de la unitat d'extracció.
- L'interval entre una donació de cèl·lules mare per via perifèrica i qualsevol donació (sang total, plasma, citafèresi) serà de 6 mesos. En circumstàncies especials, segons criteri mèdic del responsable de la unitat d'extracció.
- L'interval entre una donació de sang total o una donació d'eritrocits per afèresi, o un error en la devolució dels

eritròcits durant l'afèresi i la següent donació, sense recollida d'eritròcits

(plasma i/o plaquetes) ha de ser, almenys, de 2 mesos.

Codi: T-DI-EM-001

Revisió: 13

MANUAL DE

Data: 21 d'abril de 2017

TÈCNiques

Pàgina 54/80

#### TÍTOL: CRITERIS PER ACCEPTAR / EXCLOURE ALS DONANTS DE SANG TOTAL I COMPONENTS SANGUINIS

- En una extracció de multicomponents el volum net total de plasma, plaquetes i eritròcits del donant no ha d'excedir els 600 mil·lilitres. No es pot extreure més del 13% de la volèmia del donant, incloent els tubs per anàlisis.
- En cas de que per pèrdua acumulada d'hematies sigui superior a 200 mL per citafèresi successives, o per si s'extreu 1 unitat de concentrat d'hematies addicional, o si no és pot retornar al donant les hematies, s'esperarà un termini, almenys, d'1 mes, per poder realitzar una altra citafèresi. Si en el nou procés s'extreuen hematies, l'interval serà de 2 mesos.

TÍTOL: CRITERIS PER ACCEPTAR / EXCLOURE ALS DONANTS DE SANG TOTAL I COMPONENTS SANGUINIS

4.5. CRITERIS ESPECÍFICS PER A UNA AUTOTRANSFUSIÓ (SANG TOTAL)

FREQÜÈNCIA DE DONACIONS

El interval entre 2 donacions i entre l'última donació i la intervenció quirúrgica ha de ser superior a 3 dies.

4.5.1 IDENTIFICACIÓ, EXPLORACIÓ I CONSIDERACIONS GENERALS DEL DONANT-MALALT

S'han de complir els criteris especificats al apartat 4.2. IDENTIFICACIÓ, EXPLORACIÓ I CONSIDERACIONS GENERALS DEL DONANT, excepte:

EDAT

L'edat i el pes per se no són criteris d'exclusió. La decisió correspon al metge.

NIVELL D'HEMOGLOBINA

El límit inferior d'hemoglobina ha de ser superior o igual a 110 g/L.

PES

L'única limitació és que el donant ha de pesar més de 10 Kg. (nens).

VOLUM DE SANG

El volum a extreure estarà en relació amb la volèmia del pacient, no es pot extreure >13% de la volèmia, si no es fa reposició de líquids.

4.5.2 CRITERIS I CONDICIONS A CONSIDERAR, REFERENTS A MALALTIES O ANTECEDENTS

Són criteris d'exclusió definitiva:

- Malaltia cardíaca greu en situació inestable.
  - Determinació positiva de l'antigen de l' Hepatitis B (HBsAg).
  - Marcadors positius per al virus de l' hepatitis C.
  - Marcadors positius per al virus de la Immunodeficiència Adquirida I/II.
  - Marcadors positius per al virus de l' HTLV I/II.
  - Malaltia de Chagas o antecedent de la mateixa.
- Són criteris d'exclusió indefinida fins que la recuperació sigui total:
- La infecció bacteriana activa.



Codi: T-DI-EM-001

Revisió: 13

MANUAL DE

Data: 21 d'abril de 2017

TÈCNiques

Pàgina 56/80

## TÍTOL: CRITERIS PER ACCEPTAR / EXCLOURE ALS DONANTS DE SANG TOTAL I COMPONENTS SANGUINIS

### 4.6. CRITERIS ESPECÍFICS PER A UNA DONACIÓ DE SANG TOTAL PER A PANELL

Aquestes unitats de sang total, no van destinades a transfusió, només s'utilitzen per a la preparació de reactius per detectar la presència d'anticossos irregulars o la seva identificació, en el sèrum dels receptors i dels donants de sang (panells de criatge).

Per aquesta raó el departament d'Immunohematologia selecciona donants que els seus hematies tenen uns fenotips determinats i els cita per fer una extracció en una data concreta. Per a lo qual fa arribar al punt d'extracció (DI o EM) l'R-IH-805: Col·lectes donants de panell a nom del donant i data de la citació i l'R-IH-808: Etiqueta per a la donació de panell d'escrutini/identificació (de color verd), que s'ha de posar a la bossa de sang total extreta.

#### 4.6.1 IDENTIFICACIÓ, EXPLORACIÓ I CONSIDERACIONS GENERALS DEL DONANT-MALALT

S'han de complir tots els criteris especificats a l'apartat 4.2. Identificació, exploració i consideracions generals del donant.

#### 4.6.2 CRITERIS I CONDICIONS A CONSIDERAR, REFERENTS A MALALTIES O ANTECEDENTS

S'han de complir tots els criteris especificats a l'apartat 4.3. Criteris i condicions a considerar, referents a malalties o antecedents, però en els criteris que suposen risc per a la salut dels receptors dels components sanguinis si es destinaren a transfusió, que tenen exclusió temporal es pot fer

l'extracció, sempre que el donant és trobi recuperat de la malaltia o del procés terapèutic-diagnòstic al que s'ha sotmès, a excepció de la possible exposició amb el virus de l'Ebola, per

contacte amb pacients amb la malaltia.

Així en cap cas es podrà extreure la unitat de sang total si el donant:  Té un criteri d'exclusió definitiva.

- Ha tingut una possible exposició amb el virus de l'Ebola, per contacte amb pacients amb la malaltia. S'ha de respectar el període de 2 mesos establert, des de la finalització del contacte, sempre que el donant estigui asimptomàtic, per la possibilitat de contagi dels tècnics que manipulin la sang en el laboratori.

Cal anotar al camp "Comentaris" de la fitxa informàtica del donant, en eProgesa (i si cal prèviament a l'apartat "Observacions" de l'R-DI-001: Fitxa donant), si hi ha algun problema que, en

un donant que no fos de panell (unitat destinada a transfusió), hagués estat motiu d'exclusió temporal, amb la data.

Encara que sigui un donant de PANELL, si la donació no està dirigida pel departament d'Immunohematologia, amb l'R-IH-805: Col·lectes donants de panell a nom del donant i data de la citació i l'R-IH-808: Etiqueta per a la donació de panell d'escrutini / identificació (de color verd), la donació es destinarà a TRANSFUSIÓ i per tant s'ha de complir amb els temps d'exclusió establerts en els apartats 4.2. Identificació, exploració i consideracions generals del donant i 4.3. Criteris i condicions a considerar, referents a malalties o antecedents.

Codi: T-DI-EM-001  
Revisió: 13

## MANUAL DE TÈCNiques

Data: 21 d'abril de 2017

Pàgina 57/80

### TÍTOL: CRITERIS PER ACCEPTAR / EXCLOURE ALS DONANTS DE SANG TOTAL I COMPONENTS SANGUINIS

#### 4.7. BIBLIOGRAFIA

- DIRECTIVA 2004/33/CE DE LA COMISSIÓ de 22 de març de 2004 per la que s'aplica la Directiva 2002/98/CE del Parlament Europeu i del Consell referent a determinats requisits tècnics de la sang i els components sanguinis.
- Bush MP, Yonns MJ, Jamsra SJ et al., «Risk of human immunodeficiency virus HIV) transmissió by blood transfusion before the implementation of HIV-1 antibody screening» Transfusion 1991; 31:655-661.
- Hanson SA, France CR. «Predonation water ingestion attenuates negative reactions to blood donation. Transfusion 2004; 44: 924-928.
- Newman B. «Blood Donor suitability and allogenic whole blood donation». Transfusion Med. Rev. 2001, 15 (3): 234-244.
- Newman B. «Adjusting our management of female blood donors: the key to an adequate blood supply. Transfusion 2004; 44: 591-596.
- Radtke H, Tegtmeier J, Röcker L, Salama A, Kiesewetter H. «Compensating for iron loss irregular blood donors using ferrous gluconate and ascorbic acid». Transfusion 2005; 45:1236-1237.
- Wood EM, Kim DM, Miller JP. «Accuracy of predonation that sampling effects donor safety, eligibility and deferral rates». Transfusion 2001, 41: 353-359.
- Halperin A, Baetens J, Newman B. «The effect of short-term, temporary deferral on future blood donation». Transfusion 1998, 38 (2): 181-3.

- Nishioka Sde A, Gyorkos TW. «Tattoos as risk factors for transfusion-transmitted diseases». Int J Infect Dis 2001; 5 (1): 27-34.
- Prati D, Taioli E, Zanella A, et al. Updated Definitions of Healthy Ranges for Serum Alanine Aminotransferase Levels. Annals of Internal Medicine 2002; 137(1): E1-E10. □ Silvani C, Vianello L, Resarau P, et al., Blood donors with «medium» o «minor» risk factors for human immunodeficiency virus infection: llauri they eligible for donati3n? Haematologica 2000; 85: 1055-1059.
- Bianco C, BrittenhamG, Gilcher RO, et al., Maintaining iron balanç in women blood donors of childbearing age: summary of a workshop. Transfusion 2002; 42: 798-805. □ Wood EM, Kim DM, Miller JP. Accuracy of predonation Hct sampling affects donor safety, eligibility, and deferral rates. Transfusion 2001; 41: 353-359.
- Lopez Berio A. Hist3ria M3dica Predonaci3. XIII Congr3s Nacional de la SETS. Barcelona, juny 2002.
- Stichtenoth DG., Deicher HRG, Fr3lich JC. Blood donors on medication. Llauri deferral periods necessary? Eur J Clin Pharmacol. 2001; 57: 433-440.
- Guide to the preparation, usi and quality assurance of blood components. Council of Europe Publishing. 12. a Editi3n, 2005.
- Danic B. «3noncer li conditions d'un don du sang estandard et li motifs d'exclusi3n». Transfus Clin Biol 2005; 12: 287-289.

Codi: T-DI-EM-001

Revisi3: 13

MANUAL DE

Data: 21 d'abril de 2017

T3CNIQUES

P3gina 58/80

### T3TOL: CRITERIS PER ACCEPTAR / EXCLOURE ALS DONANTS DE SANG TOTAL I COMPONENTS SANGUINIS

- Strauss RG. «Rationale for Medical Director Acceptance or Rejection of Allogeneic Plateletpheresis Donors with Underlying Medical Disorders». J. Clin. Apheresis 2002; 17: 111-117.
- International travel and Health, WHO 2012.
- UKBTS and NIBSC. Whole Blood and Apheresis Donor Selection Guidelines. Edition 201. Release 05 Issued 25 October 2004.
- Candolfi E. «Transfusion transmitted malaria, preventive measures». Tranf Clin Biol 2005; 12: 107-113.
- Kitchen A, Mijovic A, Hewitt P3G. «Transfusion-transmitted malaria: current donor selection guidelines llauri not sufficient». Vox Sang. 2005; 88: 200-201. □ Vrielink H, Reesink HW. HTLV-I/II Prevalence in Different Geographic Locations. Trans Med Review 2004; 18: 46-57.
- Gasc3 J, Mu3oz J, Vilella A. «Malaltia de Chagas importada: un nou repte de salut p3blica?». Malalties Emergents 2005; 8 (supl. 1): 8-47.
- Beauplet A, et al., Guide pour la selection medicale des candidats au don de sang. Tranf Clin Biol 2003; 10: 367-495.
- Whole Blood and Component Donor Selection Guidelines. United Kingdon Blood Transfusion Services. Edition 2003. Release 21- 13 de febrer de 2014.

## 5.- MEDI AMBIENT

No aplica.

## 6.- PREVENCIÓ DE RISCOS

A l'interactuar amb públic en general, i al recollir les seves percepcions cal empatia i mantenir una actitud receptiva i positiva, evitant donar informacions no verificades i no valorar opinions, amb aquestes pautes evitarem càrregues psicosocials.

Al realitzar les tasques amb pantalles de visualització de dades cal tenir present les mesures higièniques i ergonòmiques per evitar la fatiga física i visual.

Les aplicacions informàtiques per dur a terme aquestes tasques han de complir amb els requisits mínims que recull la normativa vigent referent als caràcters, a la mida, al contrast, etc. dels elements del programa informàtic que han de poder ajustar-se a les necessitats de l'usuari.

### MANUAL DE TÈCNiques

Codi: T-DI-EM-001

Revisió: 13

Data: 21 d'abril de 2017

Pàgina 59/80

#### TÍTOL: CRITERIS PER ACCEPTAR / EXCLOURE ALS DONANTS DE SANG TOTAL I COMPONENTS SANGUINIS

En les tasques on es manipula sang i productes biològics és obligatori l'ús dels guants de nitril.

Per evitar punxades amb les agulles d'extracció cal eliminar-les d'immediat després del seu ús en els contenidors grocs (grup III) i respectar el nivell d'emplenament d'aquests.

## 7.- DOCUMENTS I REGISTRES

R-DI-001: Fitxa donant

R-IH-805: Col·lectes donants de panell

R-IH-808: Etiqueta per a la donació de panell d'escrutini/identificació

## 8.- MODIFICACIONS DEL DOCUMENT

NÚMERO VERSIÓ  
DATA

APROVACIÓ HISTÒRIC  
MODIFICACIONS DEL DOCUMENT

3 23/11/2001 20/05/2003

S'ha inclòs en el redactat de la tècnica els criteris d'exclusió de la comissió assessora sobre la promoció i transfusió sanguínia. Preguntar a tots els possibles donants si han estat recentment a àrees o països afectats per la Síndrome Respiratòria Aguda (SARS): Xina, Singapur, Filipines i Mongòlia Interior. En cas afirmatiu,

s'exclourà temporalment:

3 setmanes: si està asimptomàtic

3 mesos: si pot ser sospitós d'estar contagiats

Cal que el metge o infermer anoti a la fitxa del donant (R-DI 001, R-DI-002, R-EM-001 i R-EM-002) que ha estat interrogat ("SARS neg") i signar-ho.

Referències

1- WHO Recommendations on SARS and Blood Safety (15/5/03)

4 27/02/2004 S'han introduït petits canvis i alguna exclusió nova a conseqüència de l'actualització el gener 2002 del document Criteris d'exclusió per a la donació de sang, per part de la comissió assessora sobre la promoció i transfusió sanguínia:

Codi: T-DI-EM-001

Revisió: 13

MANUAL DE

Data: 21 d'abril de 2017

TÈCNIQUES

Pàgina 60/80

#### TÍTOL: CRITERIS PER ACCEPTAR / EXCLOURE ALS DONANTS DE SANG TOTAL I COMPONENTS SANGUINIS

la cirurgia ha necessitat de transfusió de sang o components, en el cas de la malaltia de Chagas, els visitants i nascuts en països endèmics (tot Centre i Sudamèrica) poden donar sang passats 6 mesos després d'haver sortit de l'àrea endèmica mentre no hagin patit símptomes,

s'afegeix una exclusió durant 12 mesos de les persones que hagin rebut una transfusió de sang o components.

l'exclusió per a les persones amb toxoplasmosi s'ha escurçat de 2 anys a 6 mesos.

Cada 6 donacions de plasma cal fer un control de les proteïnes totals i de les fraccions de les globulines.

Les persones de més de 65 anys poden donar sang seguint els criteris especificats en l'apartat corresponent.

S'han fet modificacions àmplies als criteris d'exclusió de donants.

S'ha tret el punt: Criteris per extreure sang destinada al pannel d'identificació (PH).

5 21/10/2005 06/02/2006

en el cas de les persones diagnosticades d'epilèpsia, poden donar aquelles que portin 3 o més anys sense tractament i sense haver patit episodis convulsius en aquest temps, l'exclusió per a les persones que han patit cirurgia major s'escurça de 12 a 6 mesos, excepte quan

1.- Atès que es fa la PCR de rutina del VHB, del VHC i del VIH les exclusions derivades del risc de transmissió d'aquests virus a través de la sang es redueixen de 6 a 4 mesos. En aquest apartat s'inclouen els següents

antecedents: endoscòpies amb material flexible, esquitxos de sang a mucoses o lesions amb agulles, transfusió de components sanguinis, trasplantament de teixits o cèl·lules d'origen humà, tatuatges i perforacions a la pell o mucoses, acupuntura, persones amb contacte directe domèstic o amb relacions sexuals amb portadores del VHB.

2.- Atès que la redacció de l'apartat d'aquesta tècnica, on es descriu els criteris per acceptar a persones amb antecedents de convulsions, ha produït

confusions, es modifica quedant com es descriu a continuació.

“S'exclouen les persones amb història d'epilèpsia amb tractament continuat. Podran donar sang les que en els darrers tres anys no hagin presentat crisis i no requereixin tractament anticonvulsivant. Es descartaran també les persones amb episodis de convulsions no etiquetats, estiguin o no sotmesos a tractament. Podran donar sang les persones amb antecedents de síncope o convulsions durant la infància i adolescència.”

6 08/06/2009 S'han inclòs les recomanacions per la correcta identificació del donant de primera vegada.

Es modifica el període d'exclusió després d'avortament i lactància.

Codi: T-DI-EM-001

Revisió: 13

MANUAL DE

Data: 21 d'abril de 2017

TÈCNIQUES

Pàgina 61/80

## TÍTOL: CRITERIS PER ACCEPTAR / EXCLOURE ALS DONANTS DE SANG TOTAL I COMPONENTS SANGUINIS

Es clarifica l'exclusió en cas de coagulopaties.

Es redueix el període d'exclusió de 6 a 4 mesos en la prevenció de la transmissió del VHC, VHB i VIH.

S'exclouen les parelles sexuals i les persones que conviuen amb portadors del VHB, incloent els vacunats.

Es considera de risc de Chagas l'haver estat, independentment de la durada, en zones rurals d'algun dels països endèmics.

Paludisme: s'ha redactat novament i totes aquelles persones que han viscut en zona de paludisme un període de més de 6 mesos, s'exclouen durant 3 anys després de tornar de l'última visita a zona endèmica.

Donants amb antecedent de transfusió fora d'Espanya: actualització dels països acceptats.

S'ha redactat novament l'apartat corresponent a l'epilèpsia.

S'ha introduït la consideració de la vacuna del virus del papil·loma humà, que no exclou la donació atès que es tracta d'una vacuna no cel·lular.

S'ha afegit l'antiagregant plaquetar Clopidogrel en els fàrmacs amb exclusió temporal de plaquetofèresi.

S'ha afegit a plasmafèresi: no extreure més del 13% de la volèmia.

Als donants de panell s'aplica mateix full d'autoexclusió dels donants de sang R-DI-001.

S'actualitza el llistat i mapes (annex 1) de països endèmics per HTLV I/II.

Nou (annex 2) llista la codificació per la identificació de donacions amb incidències especials.

7 29/01/2010 S'ha inclòs la història mèdica pre-donació.

S'han incorporat en els criteris d'acceptació de donants el llistat exhaustiu de condicions i patologies per ordre alfabètic.

S'ha incorporat al codi de la tècnica les sigles –EM (EQUIPS MÒBILS), per tant, el nou codi és T-DI-EM-001: CRITERIS PER ACCEPTAR / EXCLOURE DONANTS, ja que aplica a les donacions internes i als equips mòbils.

8 07/05/2010 S'ha modificat el punt 4.2. IDENTIFICACIÓ DEL DONANT. S'ha inclòs l'històric de modificacions de la tècnica.

9 05/09/2011 S'ha inclòs que sempre ha de constar el domicili del donant i s'ha de verificar que sigui actual.

S'ha unificat el període d'exclusió, a 6 mesos, per als donants amb contacte estret amb pacients amb hepatitis viral de causa desconeguda i amb hepatitis A (aguda).

Referent a l' HTLV-I/II: Atès que es fa la PCR universal, ha quedat suprimida l'exclusió per naixement o residència en països o zones endèmiques.

S'ha reduït, de 14 a 7 dies el període d'exclusió després de febre i infecció banal.

Codi: T-DI-EM-001

Revisió: 13

MANUAL DE

Data: 21 d'abril de 2017

TÈCNIQUES

Pàgina 62/80

## TÍTOL: CRITERIS PER ACCEPTAR / EXCLOURE ALS DONANTS DE SANG TOTAL I COMPONENTS SANGUINIS

S'ha definit un període d'exclusió de 4 setmanes, des de la curació, per a la parotiditis i la rubèola.

S'ha definit un període d'exclusió de 15 dies per als donants que han rebut la vacuna de l' hepatitis B.

S'han definit, en l'apartat viatges, els comunicats d'alertes sanitàries per brots epidèmics de diferents virus i altres patògens.

S'han redactat de manera més entenedora diversos criteris d'exclusió: Alcoholisme, antiinflamatoris no esteroïdals, diürètics, hipertensió arterial, hipotensió arterial, malalties psiquiàtriques, malària/paludisme, medicaments, poliglobulia, proctitis, relacions sexuals, viatges, virus del nil occidental, virus SARS, vitamines, xenotrasplant, criteris per a una plaquetoafèresi i per a una plasmafèresi.

10 26/10/2012 A l'apartat 4.2. Història mèdica pre-donació i identificació del donant:

S'han incorporat els apartats:

Idioma: De forma general cal excloure a les persones que no entenguin el full d'exclusió i a les que sigui impossible fer un correcte interrogatori mèdic. NO s'acceptarà la participació de cap intèrpret, familiar o professionals i/o mediadors culturals, per garantir la confidencialitat de la història mèdica, així com la veracitat de les respostes del donant i en conseqüència la qualitat de la selecció del donant.

Estades a la presó: Les persones ingressades en institucions penitenciàries, que no han pres drogues per via endovenosa, queden excloses per un període de 4 mesos.

S'han modificat els apartats:

Edat: Donants entre 65 i 70 anys poden donar amb valoració acurada per part de personal mèdic, sense tenir en compte si han presentat complicacions en els darrers 2 anys.

Règim de menjats: S'ha definit el temps d'espera després d'un

menjar abundant i lleuger.

A l'apartat 4.3. Malalties o antecedents de:

S'han incorporat els punts:

Disminuïts psíquics.

Sarcoïdosi.

Síndrome de Down.

Síndrome tòxic per oli de colza.

Toxina Botulínica.

S'han modificat els punts:

Fatiga crònica: S'ha tret l'exclusió definitiva. Es pot donar si la persona és capaç de portar una activitat diària normal.

Vacunes: S'ha incorporat que les vacunes desensibilitzants no són motiu d'exclusió, si el donant es troba bé.

S'ha redactat de manera més entenedora diversos criteris d'exclusió:

Codi: T-DI-EM-001

Revisió: 13

MANUAL DE

Data: 21 d'abril de 2017

TÈCNIQUES

Pàgina 63/80

TÍTOL: CRITERIS PER ACCEPTAR / EXCLOURE ALS DONANTS DE SANG TOTAL I COMPONENTS SANGUINIS

Antiinflamatoris no esteroïdals.

Dentista.

Drogues.

Empelt.

Hemocromatosis.

Infecció.

Malalties infeccioses.

Malalties respiratòries.

Malalties tiroïdals.

Relacions sexuals.

Síndrome d'Immunodeficiència Adquirida.

Transfusió de sang i derivats.

Tripanosomiasi (m. de Chagas).

Viatges.

A l'annex 1- Risc malalties transmissibles per països:

S'ha actualitzat el risc de malària als diferents països.

S'ha tret la relació de països endèmics per HTLV I/II.

S'han incorporat els següents punts:

5.- MEDI AMBIENT

6.- PREVENCIÓ DE RISCOS.

11 30/05/2013 S'ha canviat el títol de l'apartat 4.2: IDENTIFICACIÓ, EXPLORACIÓ I CONSIDERACIONS GENERALS DEL DONANT

A l'apartat 4.3. CRITERIS I CONDICIONS A CONSIDERAR, REFERENTS A MALALTS O ANTECEDENTS

S'ha incorporat el punt:

ANTICOSSOS MONOCLONALS: Exclusió fins a transcorreguts 12 mesos de l'acabament del tractament.



S'han modificat els punts:

- AL·LÈRGIA A MEDICAMENTS: L'al·lèrgia greu a medicaments (shock anafilàctic), és motiu d'exclusió definitiva. La presència de rash u altres manifestacions lleus són causa d'exclusió indefinida (veure 4.1 DEFINICIONS) fins a la resolució de la simptomatologia.
- ANTIBIÒTICS: Es pot donar sempre que el donant hagi seguit un tractament antibiòtic per infecció i es trobi bé. Se n'acostuma a deixar uns 14 dies com a termini raonable de recuperació de la malaltia.
- BRONQUITIS AGUDA: Pot ser acceptat una vegada es trobi bé, i hagin transcorregut 14 dies o més sense tractament.

## MANUAL DE TÈCNIQUES

Codi: T-DI-EM-001

Revisió: 13

Data: 21 d'abril de 2017

Pàgina 64/80

### TÍTOL: CRITERIS PER ACCEPTAR / EXCLOURE ALS DONANTS DE SANG TOTAL I COMPONENTS SANGUINIS

- FEBRE > 38°C: és motiu de diferir l'extracció fins transcorreguda 2 setmanes de la cessació dels símptomes.
- FEBRE TIFOIDEA: Exclusió fins 3 meses després de la curació i finalització del tractament.
- GUILLAIN-BARRÉ, síndrome de: Exclusió definitiva.
- TRIPANOSOMIASI (M. DE CHAGAS) Exclusió de 4 mesos: a la tornada d'un país d'àrea endèmica de Chagas.
- VIATGE DINS D'EUROPA: S'ha afegit a les excepcions les Illes de Madeira: exclusió temporal d'1 mes, risc de Dengue.

A l'apartat 4.4. DONACIONS ESPECIALS. AFÈRESIS  S'ha estructurat i redactat de manera més entenedora, per tipus d'afèresis.

S'han modificat el contingut dels punts:

4.4.1. Criteris ESPECÍFICS per a una plasmafèresi   
ANALÍTICA: En la primera donació es realitzaran les següents determinacions:

- Dosificació de proteïnes sèriques totals. El valor ha de ser igual o superior a 60 g/L).

Proteïnograma o dosificació de les immunoglobulines. No ha d'haver anomalies quantitatives ni qualitatives.

Hi ha d'haver control de les proteïnes totals, proteïnograma o dosificació d'immunoglobulines, cada 6 donacions o una vegada

a l'any, que s'han de mantenir en els límits de la normalitat ja especificats. Cas que la xifra de proteïnes sigui inferior a 60 g/L o hi hagi un descens >10% en la tasa de proteïnes o globulines, es suspendrà temporalment del programa de plasmafèresi, fins la seva recuperació.

#### 4.5. Criteris ESPECÍFICS per a una autotransfusió (SANG TOTAL)

PES: L'única limitació és que el donant ha de pesar més de 10 Kg. (nens).

4.5.2 CRITERIS I CONDICIONS A CONSIDERAR, REFERENTS A MALALTIES O ANTECEDENTS

Són criteris d'exclusió definitiva:

Malaltia cardíaca greu en situació inestable.

## MANUAL DE TÈCNiques

Codi: T-DI-EM-001

Revisió: 13

Data: 21 d'abril de 2017

Pàgina 65/80

### TÍTOL: CRITERIS PER ACCEPTAR / EXCLOURE ALS DONANTS DE SANG TOTAL I COMPONENTS SANGUINIS

Determinació positiva de l'antigen de l'Hepatitis B (HBsAg).

Marcadors positius per al virus de l'Hepatitis C

Marcadors positius per al virus de la Immunodeficiència Adquirida I/II.

Marcadors positius per al virus de l'HTLV I/II.

Malaltia de Chagas o antecedent de la mateixa.

Són criteris d'exclusió indefinida (veure 4.1 DEFINICIONS), fins que la recuperació sigui total:

La infecció bacteriana activa.

A l'annex 1- Risc malalties transmissibles per països:

S'ha actualitzat risc de malària en determinades regions de Grècia.

S'ha afegit en Europa: Madeira, Illes (Portugal)\*

S'ha suprimit l'Annex 2.- Codificació per identificar les donacions amb criteris especials i incidències en l'extracció, que es va substituir per l'L-DI-EM-001: Codificació per a la identificació especial en les extraccions de sang total / plasmafèresi / plaquetofèresi, relacionat només amb la T-DI EM-005: Extracció d'unitats de sang total, d'autotransfusió i de pannel.

#### 12 12/06/2015 A l'apartat 4.2. IDENTIFICACIÓ, EXPLORACIÓ I CONSIDERACIONS GENERALS DEL DONANT

S'ha modificat el apartat:

PROFESSIÓ/AFICIONS DEL DONANT: A el interrogatori constaran les dades relacionades amb la professió i aficions del donant.

No han de ser acceptats com a donants les persones que després de la donació tornen a una activitat professional o esportiva perillosa, ja que poden patir una reacció retardada que pot ser causa d'accident.

Per això, les persones amb professions tals com conductors d'autobús, taxi, tren i ambulàncies, pilots, controladors aeris, bombers, muntanyencs, escaladors, bussejadors, escafandristes, operaris de maquinària pesada com a grues, miners, treballs en altura, etc. donaran sang després de finalitzada la seva jornada laboral, de manera tal que puguin transcórrer 12-24 hores de descans (una nit de son reparador) entre la donació i la represa de la seva activitat laboral.

Codi: T-DI-EM-001

Revisió: 13

MANUAL DE

Data: 21 d'abril de 2017

TÈCNIQUES

Pàgina 66/80

## TÍTOL: CRITERIS PER ACCEPTAR / EXCLOURE ALS DONANTS DE SANG TOTAL I COMPONENTS SANGUINIS

Els donants han de ser advertits del risc de lipotímia o síncope postdonació, i de la conveniència de no practicar activitats esportives tals com a motociclisme, automobilisme, paracaigudisme, escalada, escafandrisme, esquí, etc. fins al dia següent, després d'una nit de descans.

Advertir que si fan esport de competició els seu rendiment serà més baix durant dues setmanes. Els donants que pertanyen als cossos de seguretat i porten armes reglamentàries poden donar sang sense necessitat de desprendre's de la seva arma. Aquestes van dins la cartutxera i amb la seguretat posada. La reacció en front d'una lipotímia mai ha estat treure l'arma de la cartutxera.

Personal sanitari: No hi ha proves que suggereixin que el personal sanitari que intervé en la cura de pacients infectats per virus transmissibles per transfusió, o que treballen en laboratoris hospitalaris, tinguin un major risc de ser portadors. Per tant, poden ser acceptats com a donants.

S'han redactat de manera més entenedora:

- IDENTIFICACIÓ DEL DONANT: Entenem que quan el donant escriu les seves dades personals i signa, queda suficientment identificat i que potser no és indispensable un document acreditatiu.

Malgrat això, per tal d'incrementar la seguretat:

- 1.- Als donants de primera vegada es verificarà la seva identitat mitjançant el DNI o passaport o permís de

residència o carnet de conduir,

- 2.- Als donants registrats a eProgesa ni ha prou amb qualsevol documentació on consti el número de DNI o hi hagi fotografia.
- Tot i utilitzant algun document, sempre s'ha de preguntar i fer constar les dades actuals del domicili, ja que aquest pot estar desfasat.
- En el cas de donants d'altres països, cal ser especialment curós en la presa correcta de les dades d'afiliació.

A l'apartat 4.3. CRITERIS I CONDICIONS A CONSIDERAR, REFERENTS A MALALTS O ANTECEDENTS  
S'han incorporat els punts:

MANUAL DE  
TÈCNIQUES

Codi: T-DI-EM-001  
Revisió: 13

Data: 21 d'abril de 2017

Pàgina 67/80

TÍTOL: CRITERIS PER ACCEPTAR / EXCLOURE ALS DONANTS DE SANG  
TOTAL I COMPONENTS SANGUINIS

- CATÈTERS: Els catèters endovenosos i els utilitzats per les anestesies epidurals són d'un sol ús i no exclouen la donació.

En els casos amb catèters endovenosos de llarga duració i anticoagulació amb heparina, excloure durant 4 mesos, per la possibilitat de què s'utilitzi el mateix vial d'heparina o sèrum fisiològic per a diversos pacients i aquests puguin estar contaminats per restes de sang d'algun malalt portador del VHC o del VHB.

Els catèters utilitzats per realitzar d'ablació cardíaca poden ser reutilitzables, el termini de temps que ha de transcórrer, quan la malaltia de base no contraindica la donació, serà de, almenys 4 mesos.

- CHICUNGUNYA, febre de: Exclusió fins 6 mesos després de la curació.

- EBOLA, malaltia d': Exclusió definitiva.

Les persones amb possible exposició al virus Ebola, per contacte amb pacients amb malaltia d'Ebola, s'exclouran per un període de 2 mesos des de la finalització del contacte, sempre que el donant estigui asimptomàtic.

- PAPILOMAVIRUS, Infecció: Acceptar si no hi cap simptomatologia i no s'evidencien pràctiques sexuals de risc

- TALASSÈMIA: Minor: Poden donar si presenten una xifra d'hemoglobina normal.

Mayor: exclusió definitiva.

- Vacunes: Encefalitis japonesa per Virus inactivat (única disponible en Espanya) acceptar si es troba bé; per Virus atenuat (possibilitat en altres països) 4 setmanes (28dies).

Tífica/paratífica per via parenteral acceptar si es troba bé.  
Meningococo acceptar si es troba bé.

- WOLF PARKINSON WHITE: Acceptar si han estat sotmesos a una cardioversió/ablació i està donant d'alta.

Els catèters utilitzats per realitzar d'ablació cardíaca poden ser reutilitzables, el termini de temps que ha de transcórrer, quan la malaltia de base no contraindica la donació, serà de, almenys 4 mesos.

## MANUAL DE TÈCNiques

Codi: T-DI-EM-001  
Revisió: 13

Data: 21 d'abril de 2017

Pàgina 68/80

### TÍTOL: CRITERIS PER ACCEPTAR / EXCLOURE ALS DONANTS DE SANG TOTAL I COMPONENTS SANGUINIS

És pot acceptar si el pols es troba entre 50 i 100 pulsacions i es detecten menys de 10 extrasístoles per minut.

Veure ARRITMIES (TRANSTORNS DEL RITME).

S'ha modificat part dels punts (text subratllat):

- ACNE: No és motiu d'exclusió llevat d'infecció secundària de les lesions. Existeixen, tanmateix, determinats preparats utilitzats en el seu tractament que són teratògens i s'acumulen en sang durant llargs períodes de temps:

Pot ser acceptat si les lesions no estan secundàriament infectades. Els tractaments tòpics i amb tetraciclina o eritromicina orals i acetat de ciproterona + etilnestradiol (Diane, Schering) no exclouen.

Exclusió durant 1 mes després de l'última dosi d'Isotretinoïna sistèmica o tòpica (Roacutan®, Isotrex gel@....).

Exclusió durant 3 anys si segueix tractament amb Acitretina (NeoTigasón).

- ANESTÈSIA GENERAL /LOCAL /EPIDURAL: No és motiu d'exclusió "per se".

L'exclusió i la durada, en el seu cas, dependran del procés base. Veure CATÉTER

- BEHÇET: Veure MALALTIES AUTOIMMUNES

- CLAUDICACIÓ INTERMITENT: Exclusió indefinida (veure 4.1 DEFINICIONS). Podran donar els malalts tractats amb "stent" que no precisin tractament anticoagulant ni antiagregant i estiguin lliures de simptomatologia.

- DIABETIS MELLITUS: Poden acceptar-se com a donants les persones amb diabetis no insulíndependent tractats amb dieta, amb medicació per via oral o injectable diferent de la insulina (Victoza®, Byetta®...) que es trobin bé, estiguin ben controlats i no presentin complicacions vasculars a conseqüència de la malaltia.

L'exclusió serà definitiva si la diabetis és insulíndependent.

L'antecedent d'un episodi d'intolerància a la glucosa durant l'embaràs o mentre està sent tractat amb corticoides per una malaltia aguda no exclou.

Codi: T-DI-EM-001

Revisió: 13

MANUAL DE

Data: 21 d'abril de 2017

TÈCNiques

Pàgina 69/80

## TÍTOL: CRITERIS PER ACCEPTAR / EXCLOURE ALS DONANTS DE SANG TOTAL I COMPONENTS SANGUINIS

- ESTUDI MÈDIC: Els donants sotmesos a estudis mèdics, o en llista d'espera han de ser valorats individualment.

Si el problema de salut que pateixen no és motiu de contraindicació per a la donació poden ser acceptats.

Avisar que han d'advertir al metge que els hi fa el seguiment que han fet una donació de sang perquè pugui valorar millor els resultats analítics, pot haver un descens de la hemoglobina.

- EXPLORACIONS MÈDIQUES: Independentment del motiu pel que es realitzen les exploracions (que també s'ha de tenir en compte) el risc és la transmissió viral, principalment del VHC.

Encara que els casos descrits estaven relacionats amb endoscòpies digestives amb biòpsia, per precaució, l'exclusió temporal es fa extensiva a tot tipus d'endoscòpies.

Els exàmens endoscòpics realitzats amb instruments rígids (colposcòpies, rectoscòpies i la majoria d'artroscòpies,...) no són excloents, en canvi els realitzats amb instruments flexibles exclouen de la donació durant 4 mesos.

- GLAUCOMA: Agut: Excloure fins la seva estabilització.

Crònic: acceptar si només tractament amb col·liris I en cas de prendre betabloquejants si el pols és superior a 60 pulsacions/min.

- GRIP: Exclusió fins 2 setmanes de la curació. Veure INFECCIÓ i FEBRE >38°C

## □ MALALTIES AL·LÈRGIQUES/ DERMATOLÒGIQUES

Síntomes respiratoris:

Es poden ser acceptats com a donants els donants que han sofert recentment o presenten en el moment de la donació símptomes i signes d'al·lèrgia lleu (congestió nasal, coïssor d'ulls, tos seca etc.) i els que sofreixen d'asma però estiguin asimptomàtics en el moment de la donació o només es tractin amb inhaladors de manera esporàdica.

Codi: T-DI-EM-001

Revisió: 13

MANUAL DE

Data: 21 d'abril de 2017

TÈCNIQUES

Pàgina 70/80

### TÍTOL: CRITERIS PER ACCEPTAR / EXCLOURE ALS DONANTS DE SANG TOTAL I COMPONENTS SANGUINIS

Malalts amb crisis respiratòries o altres manifestacions al·lèrgiques importants, no seran acceptats com a donants fins a 2 setmanes d'haver finalitzat el període de crisi i el tractament.

Síntomes dermatològics:

No seran causa de rebuig trastorns moderats d'acne, psoriasi o rash al·lèrgic excepte quan afectin l'àrea de punció o hi hagi infecció sobreafegida.

Els donants que presentin èczema local, urticària, o qualsevol altra lesió a la zona de punció venosa, seran exclosos temporalment fins que la zona estigui totalment recuperada.

Les persones que sofreixen Pèmfig o malalties atòpiques cròniques greus en tractament per via general (corticoides a dosis elevades i/o immunosupresors) , seran excloses com a donants de forma indefinida fins a 12 mesos de la finalització del tractament.

Vacunes desensibilitzadores: Es pot donar, si el donant es troba bé.

Al·lèrgia al iode, al làtex o a l'òxid d'etilè: Els donants amb aquestes al·lèrgies no han de ser exposats a les esmentades substàncies.

Veure AL-LERGIA ALIMENTARIA

Veure AL-LERGIA A MEDICAMENTS

- MALALTIES PSIQUIÀTRIQUES: Les persones en tractament amb antidepressius o liti poden ser acceptades si es troben bé.
- S'exclouran de manera indefinida (veure 4.1 DEFINICIONS) els donants amb quadre depressiu profund tractats amb neurolèptics.
- Si el donant té compromesa la capacitat d'entendre el procés de la donació o requereix control mèdic freqüent per la seva inestabilitat emocional o tendència bipolar: exclusió indefinida (veure 4.1 DEFINICIONS) fins a la recuperació.

- NEUROFIBROMATOSI: Exclusió definitiva si s'ha produït transformació maligna dels tumors que ocasiona aquest trastorn genètic del sistema nerviós. Acceptar en absència de simptomatologia neurològica, cardíaca.

Veure EPILÈPSIA. Veure ARITMIES. Veure HIPERTENCIÓ ARTERIAL.

## MANUAL DE TÈCNiques

Codi: T-DI-EM-001

Revisió: 13

Data: 21 d'abril de 2017

Pàgina 71/80

### TÍTOL: CRITERIS PER ACCEPTAR / EXCLOURE ALS DONANTS DE SANG TOTAL I COMPONENTS SANGUINIS

- PEU D'ATLETA: No és motiu d'exclusió. Si segueix tractament oral antifúngic Veure INFECCIÓ

S'han redirigits a altres apartats:

- AL·LÈRGIA: Veure MALALTIES AL·LÈRGiques/ DERMATOLÒGiques
- ANTIDEPRESSIUS: Veure MALALTIES PSQUIÀTRiques.
- ANTIDIABÈTICS ORALS (Hipoglicemians orals): Veure Diabetes Mellitus
- ANTIEPILÈPTICS/ ANTICONVULSIVANTS: Aclarir el motiu del tractament. Si són utilitzats per tractar dolor crònic, s'acceptarà el donant si la causa no és en si mateixa excloent. Atenció al fet de què alguns d'aquests medicaments són teratogènics. Veure: EPILÈPSIA. Veure: MEDICAMENTS TERATOGENICS
- ASMA: Veure Malalties Al·lèrgiques
- AUTOIMMUNES: Veure Malalties autoimmunes
- BEHÇET: Veure MALALTIES AUTOIMMUNES
- BRONCODILATADORS (Inhaladors): Veure Malalties al·lèrgiques
- CONVULSIONS: Veure EPILÈPSIA
- DEPRESSIÓ: Veure MALALTIES PSQUIÀTRiques.
- HIPERTIROÏDISME: Veure MALALTIES TIROIDALS.
- HOBBIES PERILLOSOS: Veure PROFESSIÓ / AFICIIONS DEL DONANT. pag 6
- PÈMFIG: Veure MALALTIES AL·LÈRGiques / DERMATOLÒGiques

S'han redactat de manera més entenedora:

- HEMOCROMATOSIS: La malaltia en si mateixa no



exclou de la donació.

Per això, les persones que la pateixen poden ser acceptades sempre i quan: Compleixen els criteris exigits per a la donació altruista i estiguin en la fase de manteniment amb extraccions separades més de dos mesos.

## MANUAL DE TÈCNiques

Codi: T-DI-EM-001  
Revisió: 13

Data: 21 d'abril de 2017

Pàgina 72/80

### TÍTOL: CRITERIS PER ACCEPTAR / EXCLOURE ALS DONANTS DE SANG TOTAL I COMPONENTS SANGUINIS

Per tan es descarten en la fase inicial del tractament en la que son sotmesos a una alta freqüència d'extracció per baixar la ferritina

- MALALTIES GASTROINTESTINALS: Les patologies no infeccioses (úlcera pèptica, hèrnia hiatus, gastritis, còlon irritable, hemorroides, etc.) no exclouen de la donació, si el donant es troba bé i no hi ha cap altre motiu que la contraindiqui.

Les persones amb esteatosis poden perfectament ser acceptades com a donants, encara que, com és habitual, la xifra d'ALT sigui elevada.

Qualsevol tipus de lesió cel·lular hepàtica pot incrementar lleugerament els nivells d'ALT. Valors fins a 300 U/L són considerats no específics i solen associar-se amb l'obesitat, el consum d'alcohol i de medicaments, l'exercici físic, els nivells de colesterol i triglicèrids, l'hiperglicèmia, etc.

L'acceptació o no del donant dependrà de la causa.

Nivells de 500 U/L, o superiors, es donen sobretot en persones amb hepatitis viral, hepatitis tòxica, etc. i no serien acceptables fins tenir un diagnòstic clar i en funció d'aquest.

Exclusió definitiva de donants amb hepatopatia crònica, malaltia inflammatòria crònica (rectocolitis hemorràgica, etc.), pancreatitis crònica, síndromes de malabsorció amb repercussió clínica, neoplàsia, etc.

Es valorarà també l'exclusió de les persones amb tendència a ferropènia per mala absorció de ferro o pèrdues sanguínies.

Les persones amb malaltia celíaca controlada per dieta i amb patologia funcional poden ser acceptades.

MANTOUX (Prova de la Tuberculina): La positivitat o negativitat del test, per se, no condiciona la acceptació/exclusió de la donació.

Exclusió fins llegida i interpretada la reacció i presa l'actitud terapèutica corresponent.

Acceptar si no es preveuen nous estudis i no es fa profilaxis ni tractament.

Si el malalt precisa de tractament profilàctic s'exclourà fins passats 14 dies de la fi del tractament.  
Si s'inicia tractament per Tuberculosi: Veure TUBERCULOSI

S'ha suprimit:

- MALALTIES IMMUNES: Veure AUTOIMMUNES.

Codi: T-DI-EM-001

Revisió: 13

MANUAL DE

Data: 21 d'abril de 2017

TÈCNIQUES

Pàgina 73/80

## TÍTOL: CRITERIS PER ACCEPTAR / EXCLOURE ALS DONANTS DE SANG TOTAL I COMPONENTS SANGUINIS

A l'apartat 4.4. DONACIONS ESPECIALS. AFÈRESI.

4.4.1. Criteris ESPECÍFICS per a una plasmafèresi

S'ha incorporat el punt:

- ACCEPTACIÓ/EXCLUSIÓ

En les plasmafèresis no s'acceptaran els donants amb dèficits de factors de coagulació.

Si la donació de plasma es destina EXCLUSIVAMENT al fraccionament industrial de plasma, es poden acceptar les persones residents a zona no endèmiques de paludisme que hagin visitat una zona considerada endèmica de paludisme, sense esperar els 6 mesos d'exclusió establerts per a la donació de sang total i altres components sanguinis destinats a transfusió.

Cal posar al donant l'exclusió A053: VIATGE ZONA PALUDISME/TROPICS SENSE SIMP, que només deixa donar plasmafèresi.

13 26/04/2017 A l'apartat 4.2. IDENTIFICACIÓ, EXPLORACIÓ I CONSIDERACIONS GENERALS DEL DONANT

S'ha modificat el apartat (text subratllat):

- IDENTIFICACIÓ DEL DONANT: Entenem que quan el donant escriu les seves dades personals i signa, queda suficientment identificat i que potser no és indispensable un document acreditatiu.

Malgrat això, per tal de garantir la pertinença de la sang donada i la traçabilitat dels futurs components sanguinis, s'ha de verificar la identitat dels donants:

1.- Als donants de primera vegada es verificarà la seva identitat mitjançant el DNI, passaport, ~~permís de residència~~ o carnet de conduir.

2.- Als donants registrats a eProgesa ni ha prou amb el carnet de donant o qualsevol documentació amb el nom i cognoms. En aquest cas es demanarà alguna dada personal que consti en eProgesa i haurà de coincidir per tal de confirmar la seva identitat (ex: Quin és el seu número de DNI? o Quina és la seva data de naixement?,...)

Tot i utilitzant algun document, sempre s'ha de preguntar i fer constar les dades actuals del domicili, ja que aquest pot estar desfasat.

En el cas de donants d'altres països, cal ser especialment curós en la presa correcta de les dades d'afiliació.

EDAT: Els límits d'edat per a la donació voluntària de sang se situen entre els 18 i 70 anys.

Codi: T-DI-EM-001

Revisió: 13

MANUAL DE

Data: 21 d'abril de 2017

TÈCNIQUES

Pàgina 74/80

## TÍTOL: CRITERIS PER ACCEPTAR / EXCLOURE ALS DONANTS DE SANG TOTAL I COMPONENTS SANGUINIS

En les persones més grans de 65 i menors de 70 anys s'ha de fer una valoració acurada de possibles malalties cardíaques i vasculars (més freqüents en aquestes edats), per part del personal sanitari que fa l'entrevista.

- ESTADES A LA PRESÓ: Les persones ingressades en institucions penitenciàries, per un temps superior a 72 hores, que no han pres drogues per via endovenosa, queden excloses per un període de 4 mesos.

### A l'apartat 4.3. CRITERIS I CONDICIONS A CONSIDERAR, REFERENTS A MALALTS O ANTECEDENTS

S'han modificat els apartats:

- ACCIDENT VASCULAR CEREBRAL: Exclusió definitiva. No és motiu d'exclusió el haver estat diagnosticat d'amnèsia transitòria (pèrdua de memòria temporal freqüentment associada a la migranya).
- ACITRETINA (NEOTIGASON®): Exclusió durant 2 anys pel seu
- AL·LÈRGIA A MEDICAMENTS: L'al·lèrgia greu a medicaments (shock anafilàctic, broncoespasme greu que requereix ingrés a urgències), és motiu d'exclusió durant 1 any després de l'última vegada que va estar en contacte amb el fàrmac. La presència de rash u altres manifestacions lleus són causa exclusió indefinida fins a la resolució de la simptomatologia.
- ARTRITIS REUMATOIDEA: Podran donar les persones amb un quadre lleu, que només requereixin tractament amb antiinflamatoris no esteroïdals, Sulfasalazina o Hydroxyclooroquina. Si el quadre clínic és greu o forma part d'una alteració multisistèmica, s'exclourà definitivament.
- CÀNCER: El tenir un alt risc de patir càncer, degut a antecedents familiars o a exàmens genètics, encara que s'hagi realitzat cirurgia o medicació profilàctica (ex: tamoxifè), no és motiu d'exclusió.

Encara que s'han descrit casos de transmissió de càncer per òrgans sòlids trasplantats, no es coneix cap cas de transmissió per transfusió. Tanmateix, és convenient recordar la sospita que certs virus podrien jugar un paper en el desenvolupament d'alguns tipus de neoplàsies. Per aquest motiu, s'exclou de manera definitiva els donants amb antecedents de neoplàsia.

Excepcions:

Codi: T-DI-EM-001

Revisió: 13

MANUAL DE

Data: 21 d'abril de 2017

TÈCNIQUES

Pàgina 75/80

## TÍTOL: CRITERIS PER ACCEPTAR / EXCLOURE ALS DONANTS DE SANG TOTAL I COMPONENTS SANGUINIS

- Els carcinoma in situ de cèrvix (displàsia cervical), carcinoma vulvar in situ i els tumors localitzats de pell (carcinoma basocel·lular i escamós), exclusió indefinida mentre estigui en estudi o tractament.
- Acceptar una vegada finalitzat el tractament amb èxit, sempre que no estiguin previstes altres terapèutiques.

En la infantesa, alguns tumors sòlids tals com el neuroblastoma, el tumor de Wilms, i el retinoblastoma es considera que han curat si van ser diagnosticats abans dels 5 anys d'edat i no han recidivat posteriorment.

Aquestes persones poden ser acceptades com a donants. No es poden acceptar aquelles persones que van patir malalties del tipus leucèmia i/o limfoma, per la possibilitat de la intervenció de virus en la seva patogènia.

- CANVI DE SEXE: Valorar per l'estil de vida si existeixen comportaments de risc. Si no és així, pot acceptar-se. Cal aplicar el nivell d'hemoglobina del nou sexe adquirit.

En el cas de canvi de dona a home, cal considerar-ho com dona a efectes d'utilització del plasma per a transfusió.

La medicació hormonal substitutiva no impedeix la donació

- CIRURGIA MAJOR I MENOR: S'ha afegit l'apartat: Si el donant té programada una intervenció quirúrgica sagnant, per un procés que no contraindica la donació (pròtesi maluc o genoll, intervenció per escoliosi o liposucció abdominal), hem de vigilar que hi hagi un mínim de 2 mesos, des de la donació a la intervenció.
- CONTACTE ESTRET AMB PACIENTS AMB HEPATITIS VIRAL: S'ha afegit l'apartat: Hepatitis E: exclusió fins a 6 mesos de la fi de la convivència i de l'últim contacte sexual.
- CORTICOIDES: S'ha modificat l'apartat:

Via oral/parenteral:

Exclusió indefinida fins a 4 setmanes de la fi del tractament, si és habitual i de llarga durada, incloent ènemes, o cremes aplicades sobre gran part de la superfície corporal.

- DENTISTA: S'ha afegit l'apartat: Implant de teixit oseó al·logènic o d'origen animal: Veure Empelt

## MANUAL DE TÈCNIQUES

Codi: T-DI-EM-001

Revisió: 13

Data: 21 d'abril de 2017

Pàgina 76/80

### TÍTOL: CRITERIS PER ACCEPTAR / EXCLOURE ALS DONANTS DE SANG TOTAL I COMPONENTS SANGUINIS

- EMPELTS: Excloure definitivament tots els individus que en el passat han estat tractats amb extractes derivats de glàndules pituïtàries humanes o hagin rebut empelts de duramàter, còrnia o escleròtica.

També s'ha d'excloure definitivament les persones que han rebut xenotrasplants. En aquests tipus de tractament s'inclou qualsevol procediment que impliqui el trasplantament, implantació o infusió en un humà de alguna de les dues categories de productes:

-Cèl·lules vives, teixits o òrgans d'un animal no humà.

-Fluids corporals, cèl·lules, teixits o òrgans que han tingut contacte ex-viu amb les cèl·lules vives, teixits o òrgans d'animals no humans.

Els productes de xenotrasplant són: òrgans, teixits i cèl·lules vives.

No s'inclou: El productes biològics, medicaments o dispositius mèdics provinents de cèl·lules, teixits o òrgans no vius d'animals no humans, com per exemple la insulina porcina, les vàlvules cardíagues porcines i la matriu de col·lagen porcí acèl·lular (ejem: PelviSoft®, Bio-Oss®, Bio-Gide® y Surgibone®)

No es consideren productes de xenotrasplant les mossegades i picades d'animals.

Així serà exclusió definitiva si el material viu d'un animal no humà ha estat en contacte, directa o indirectament (veure paràgraf "s'inclou"), amb la sang del donant. La exposició a material d'animals no humans, especialment quan la persona exposada està immuno-suprimit, pot resultar en infeccions inusuals, que normalment no afectarien a les persones, i podria encomanar-se als receptors.

Si han rebut altres tipus d'empelts de teixits o el trasplantament de cèl·lules d'origen humà (ossi, pell, tendons, etc.) s'exclouran, si la malaltia de base permet donar, durant almenys 4 mesos.

- EXPLORACIONS MÈDIQUES. S'ha modificat l'apartat

d'endoscòpies: Els exàmens endoscòpics realitzats amb instruments rígids (cistoscòpies, colposcòpies, rectoscòpies, la majoria d'artroscòpies,...) s'exclourà durant 7 dies, en canvi els realitzats amb instruments flexibles exclouen de la donació durant 4 mesos.

## MANUAL DE TÈCNIQUES

Codi: T-DI-EM-001

Revisió: 13

Data: 21 d'abril de 2017

Pàgina 77/80

### TÍTOL: CRITERIS PER ACCEPTAR / EXCLOURE ALS DONANTS DE SANG TOTAL I COMPONENTS SANGUINIS

- HEPATITIS VÍRICA: S'ha afegit l'apartat: 5. Hepatitis E. Excloure fins a 1 any després de la curació
- HIPOTENSIÓ ARTERIAL: Les persones que refereixen ser hipotenses, poden ser acceptades com a donants si es troben bé i no tenen síncores, ni marejos. Veure **PÈRDUA DE CONEIXEMENT**
- LIPOTÍMIES/DESMAIS: La incidència d'aquest tipus de complicacions és molt més elevada en:
  - Donant de primera vegada.
  - Donant amb antecedents de marejos en donacions prèvies.
  - Donant nerviós, que refereix que la seva tensió arterial és més baixa de la que té en aquest moment.
  - Donant nerviós, que ve amb pressa i necessita sortir aviat a causa de les seves obligacions (anar a buscar els fills a l'escola, anar a esperar al familiar que surt de quiròfan o d'urgències....).

Tots aquests donants han de ser tractats com s'especifica a l' M-DI-EM-004 (Versió 1): Recomanacions per a la prevenció de pèrdues de coneixement en els donants de sang total. 2014

Per precaució, pot ser aconsellable excloure els donants que en donacions prèvies van presentar més d'una reacció vasovagal greu o lipotímies consecutives.

- MALALTIES HEMATOLOGIQUES: S'ha redactat de manera més entenedora: Ja que l'objectiu de la transfusió sanguínia és substituir la sang perduda o defectuosa per sang sana, s'han d'excloure definitivament com a donants les persones amb qualsevol tipus de malaltia de la sang:
  - Aplàsia
  - Citopènies immunes
  - Enzimopaties
  - Hemoglobinopaties: A excepció de la Talassèmia minor. Veure TALASSÈMIA.
  - Leucèmies
  - Limfomes

- Membranopaties eritrocitàries
- Mieloma i gammopaties monoclonals
- Policitemia Vera
- Síndromes mieloproliferatius

Codi: T-DI-EM-001  
Revisió: 13

MANUAL DE  
TÈCNiques

Data: 21 d'abril de 2017

Pàgina 78/80

TÍTOL: CRITERIS PER ACCEPTAR / EXCLOURE ALS DONANTS DE SANG TOTAL I COMPONENTS SANGUINIS

- MEDICAMENTS:** Els medicaments teratògens: S'han incorporat:

Ciclosporina (Closporil<sup>®</sup>, Sandimmune<sup>®</sup>, ...): 1 any  
Psoraleno (PUVA: Fotoquimioteràpia): 1 any

Medicaments que impedeixen la donació de plaquetes:  
Aquests medicaments no contraindiquen la donació de sang total, en aquests casos cal indicar-ho per no fraccionar plaquetes, però si que s'ha d'excloure per la donació de plaquetoafèresi.

Exclusió durant 5 dies:

Ticlopidina-(Tiklid<sup>®</sup>, Ticlopidina<sup>®</sup> i Ticlodone<sup>®</sup>)  
Clopidogrel (Plavix<sup>®</sup>, Iscover<sup>®</sup>)

Exclusió durant 48 hores: S'han modificat de 5 dies a 48 d'exclusió els fàrmacs subrayats

- Aceclofenaco (Airtal<sup>®</sup>, Falcol<sup>®</sup>, Gerbin<sup>®</sup>, Sanein<sup>®</sup>) -
- Acetaminic (Espledol<sup>®</sup>, Oldan<sup>®</sup>)
- Àcid acetilsalicílic (A.A.S. <sup>®</sup>, Acido Acetilsalicilico<sup>®</sup>, Actrom<sup>®</sup> compuesto, Acyflox<sup>®</sup>, Adiro<sup>®</sup>, Aspirina<sup>®</sup>. - Àcid Mefenàmic (Coslan<sup>®</sup>)
- Dexibuprofen (Atriscal<sup>®</sup>, Seractil<sup>®</sup>)
- Diclofenac (Arrotec<sup>®</sup>, Di-retard<sup>®</sup>, Diclofenaco<sup>®</sup>, Dolonervobió<sup>®</sup>, Dolotren<sup>®</sup>, Luase<sup>®</sup>, Normulen<sup>®</sup>, Voltaren<sup>®</sup>)
- Diflunisal (Dolobid<sup>®</sup>)
- Fenilbutazona (Butazolidina<sup>®</sup>, Doctofril antiinflamatorio<sup>®</sup>)
- Flubiprofeno (Froben<sup>®</sup>, Neo-artrol<sup>®</sup>)
- Ibuprofeno (Advil<sup>®</sup>, Alginasdin<sup>®</sup>, Algidrin<sup>®</sup>, Alogesia<sup>®</sup>, Altior<sup>®</sup>, Babypiril<sup>®</sup>, Dalsy<sup>®</sup>, Diltix<sup>®</sup>, Doctril<sup>®</sup>, Dolorac<sup>®</sup>, Dorival<sup>®</sup>, Espidifen<sup>®</sup>, Feminalin<sup>®</sup>, Gelofeno<sup>®</sup>, Ibumac<sup>®</sup>, Ibuprofeno<sup>®</sup>, Ibuprox<sup>®</sup>, Isdol<sup>®</sup>, Junifen<sup>®</sup>, Neobrufen<sup>®</sup>, Nodolfen<sup>®</sup>, Norvectan<sup>®</sup>, Nurofen<sup>®</sup>, Pocyl<sup>®</sup>, Saetil<sup>®</sup>, Salvarina<sup>®</sup>)
- Indometacina (Alivosin<sup>®</sup>, Artri-Medical<sup>®</sup>, Artrinovo<sup>®</sup>, Fiacin<sup>®</sup>, Flogoter<sup>®</sup>, Inacid<sup>®</sup>, Indolgina<sup>®</sup>, Indonilo<sup>®</sup>, Mederreumol<sup>®</sup>, Neo-decabutin<sup>®</sup>, Reumo-roger<sup>®</sup>, Reusin<sup>®</sup>)

- Ketoprofeno (Arcental®, Fastum®, Ketoprofeno®, Orudis®)

Codi: T-DI-EM-001

Revisió: 13

MANUAL DE

Data: 21 d'abril de 2017

TÈCNIQUES

Pàgina 79/80

## TÍTOL: CRITERIS PER ACCEPTAR / EXCLOURE ALS DONANTS DE SANG TOTAL I COMPONENTS SANGUINIS

- Ketorololaco (Acular®, Algikey®, Droal®, Tonum®, Toradol®)

- Meloxicam (Movalis®, Parocin®, Uticox®).

- Nabumetona (Listran®, Relif®)

- Naproxeno (Aleve®, Aliviomas®, Antalgin®, Denaxprem®, Lundiran®, Naproxyn®, Naproval®, Naproxeno®, Tacron®)

- Piroxicam (Artragil®, Brexinil®, Cycladol®, Doblextan®, Feldene®, Improntal®, Pirixicam®, Salvacam®, Sasulem®, Vitaxicam®)

- Sulindaco (Sulinda®)

- Tenoxicam (Artriunic®, Reutenox®, Tilcotil®)

PSORIASI: Acceptar si el quadre és lleu, la zona de venipunció està lliure de lesions i només segueix tractament tòpic.

Exclusió indefinida fins a la recuperació, si les lesions cutànies són generalitzades i greus.

Exclusió durant 12 mesos des de l'última dosi de tractament que pot afectar el sistema immune (PUVA, metotrexate, ciclosporina, hidroxycarbamida,...).

Exclusió durant 2 anys des de l'última Acitretina (Neotigason ).

Exclusió definitiva si s'ha tractat amb Etreinat (Tigason ) (ja no s'utilitza).

Veure MALATIES AUTOIMMUNES

VACUNES. S'han afegit:

██████████ 4 setmanes (28 dies) ██████████

██████████ Acceptar si es troba bé ██████████

Acceptar si es troba bé Virus papiloma humà Acceptar si es troba bé

S'ha suprimit:

MALALTIES TROPICALS, per estar incloses en altres apartats.

A l'apartat 4.4. DONACIONS PER AFÈRESI.

S'ha incorporat/modificat criteris als punts:

4.4.1. Criteris ESPECÍFICS per a una plasmafèresi  
ACCEPTACIÓ/EXCLUSIÓ



En les plasmafèresis no s'acceptaran els donants amb dèficits de factors de coagulació, ni amb determinació d'anticossos irregulars positiva.

Codi: T-DI-EM-001

Revisió: 13

MANUAL DE

Data: 21 d'abril de 2017

TÈCNIQUES

Pàgina 80/80

## TÍTOL: CRITERIS PER ACCEPTAR / EXCLOURE ALS DONANTS DE SANG TOTAL I COMPONENTS SANGUINIS

- Donat que no es pot diferenciar informàticament si la donació de plasma és per a transfusió o per a obtenció d'hemoderivats, no es podran admetre les persones residents en zona no endèmica de malària que hagin visitat una zona considerada endèmica abans dels 6 mesos de la seva tornada, per realitzar donació de plasma per a fraccionament industrial.

### 4.4.4. RELACIONS DE FREQUÈNCIA I VOLUM ENTRE LES DIFERENTS MODALITATS DE DONACIÓ (plasmafèresi, citafèresi, sang total

- L'interval entre una donació de moll de l'os i qualsevol donació (sang total, plasma, citafèresi) serà d'1 any. En circumstàncies especials, segons criteri mèdic del responsable de la unitat d'extracció.

- L'interval entre una donació de cèl·lules mare per via perifèrica i qualsevol donació (sang total, plasma, citafèresi) serà de 6 mesos. En circumstàncies especials, segons criteri mèdic del responsable de la unitat d'extracció.

S'ha afegit l'apartat:

4.6. Criteris específics per a una donació de sang total per a PANELL.

L'Annex 1.- Risc malalties transmissibles per països: S'ha actualitzat amb les dades del CDC-OMS 2016

S'ha afegit: l'Annex 2.- Llistat alfabètic països i risc de malària: Amb el mateix contingut que l'annex 1, per facilitar la cerca de risc de malària, de tots els països del món ordenats de manera alfabètica.

S'ha canviat el títol de la tècnica abans era "CRITERIS PER ACCEPTAR / EXCLOURE DONANTS" i ara és "CRITERIS PER ACCEPTAR / EXCLOURE ALS DONANTS DE SANG TOTAL I COMPONENTS SANGUINIS".

## 9.- ANNEXOS

Annex 1.- Risc malalties transmissibles per països.

Annex 2.- Llistat alfabètic països i risc de malària  
Annex comunicat d'alerta sanitària.- Un per cada alerta, durant la seva vigència.

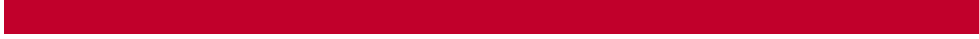

**Annex 1.2: Update of the protocol for the selection of COVID-19 convalescent plasma donors**

## ACTUALITZACIÓ DEL PROTOCOL PER A LA SELECCIÓ DE DONANTS DE PLASMA CONVALESCENT COVID-19

Objectiu:

Disposar de plasma provinent de pacients convalsents amb anticossos anti- SARS-CoV 2 pel tractament de la infecció COVID-19.

### 1. Selecció dels donants:

Selecció amb entrevista telefònica (a càrrec del equip constituït per a la selecció pels donants de la província de Barcelona, i a càrrec dels centres territorials pels donants de Tarragona, Lleida i Girona): informació assaig, acceptació participació, idoneïtat com a donant convalsent (Criteris bàsics per la donació de plasma segons el RD 1088/2005, T DI-EM-001 + Criteris d'inclusió de l'assaig)

- Criteris bàsics:
  - Sexe: home o dona sense antecedents de gestació.
  - Edat:  $\geq 18$  anys i 65 anys. Si son donants habituals es poden acceptar fins als 70 anys.
  - Pes  $\geq 50$  Kg.
  - No haver rebut mai una transfusió sanguïnia
    - Interrogar sobre malalties, medicaments, proves mèdiques, possibles contactes amb persones afectes d'una malaltia infecciosa viatges, i la resta de criteris especificats en la T DI-EM-001
- Han d'haver passat mínim 28 dies després de la resolució dels símptomes o de PCR (+) si ha passat la malaltia de forma asimptomàtica
- Informar sobre el procediment de la plasmafèresi.
- Citació per plasmafèresi. Es deixen de fer les entrevistes prèvies en els casos de candidats no donants. S'unifica el procediment entre els candidats donants habituals i els candidats no donants.
- En cas que el donant hagi donat una o més vegades plasma convalsent, s'acceptarà el donant mentre el resultat del cut-off sigui igual o superior a 3 independentment del temps que faci que el donant ha passat la malaltia. Si el cut-off és inferior a 3 es convidarà al donant a donar plasma NO convalsent.
- Quan el cut-off sigui inferior a 3 es posarà el comentari a e-Progesa: NO CITAR PLASMA COVID
  - A les dones sense antecedent gestacional ni de transfusió, se'ls farà la plasmafèresi sense mostra prèvia i se'ls mirarà els anti-HLA, anti-HNA, **anti** HPA. S'ha d'avisar a la donant que en el cas que algun d'aquests Ac sortís

positiu quedarà exclosa definitivament com a donant.

- Contestar sempre la pregunta 46. i la 47 en el cas de les dones, del qüestionari mèdic d'e-Progesa. Si es respon afirmativament la pregunta 47, es generen automàticament les proves anti-HLA, anti-HNA i anti-HPA. (no cal omplir cap document)

|    |                                                        |    |
|----|--------------------------------------------------------|----|
| 46 | Plasma convalescent COVID-19?.                         | SI |
| 47 | És la primera donació de plasma convalescent COVID-19? | SI |

## 2. Quantitat màxima d'extracció de plasma.

En el cas del plasma convalescent no aplica el P-DI-EM-006, Programa de Plasmafèresi. El volum màxim d'extracció és de 616gr (600ml).

### **Bibliografia:**

- Convalescent plasma as a potential therapy for COVID-19. [www.thelancet.com/infection](http://www.thelancet.com/infection). Published online February 27, 2020 [https://doi.org/10.1016/S1473-3099\(20\)30141-9](https://doi.org/10.1016/S1473-3099(20)30141-9).
- The convalescent sera option for containing COVID-19. <https://jci.me/138003/pdf>
- Use of convalescent plasma Therapy in SARS patients in Hong Kong. Eur J Clin Microbiol Infect Dis (2005) 24: 44-46.
- Challenges of convalescent plasma infusion therapy in Middle East respiratory coronavirus infection: a single centre experience. Antiviral Therapy 2018; 23:617-622.
- Treatment of 5 Critically Ill Patients With COVID-19 With Convalescent Plasma. JAMA. Preliminary Communication. JAMA. doi:10.1001/jama.2020.4783. Published online March 27, 2020.
- Coronavirus disease 2019 (COVID-19) and supply of substances of human origin in the EU/EEA. European Centre for Disease Prevention and Control, Stockholm, 2020.

- <https://www.fda.gov/vaccines-blood-biologics/investigational-new-drug-ind-or-device-exemption-ide-process-cber/investigational-covid-19-convalescent-plasma-emergency-inds>
- Recomendaciones para la obtención de plasma de donantes convalecientes de covid-19. Comité Científico para la Seguridad Transfusional (CCST). Versión 1.0 – 26 marzo de 2020.
- An EU programme of COVID-19 convalescent plasma collection and transfusion. Guidance on collection, testing, processing, storage, distribution and monitored use. EUROPEAN COMMISSION DIRECTORATE-GENERAL FOR HEALTH AND FOOD SAFETY

**Annex 1.3: Register of the assessment of COVID-19 convalescent plasma donor**

**REGISTRE D' AVALUACIÓ DEL DONANT DE PLASMA CONVALESCENT – CoVID-19**

|                                   |  |                      |  |
|-----------------------------------|--|----------------------|--|
| <b>Donant</b>                     |  | <b>Número donant</b> |  |
| <b>Data naixement</b>             |  | <b>Sexe</b>          |  |
| <b>Data prevista plasmafèresi</b> |  |                      |  |

**1. CHECK-LIST:**

**ESTAT DE SALUT DELS PACIENTS DONANTS**

- Estat afebril durant 7 dies
- >14 dies des de l'inici dels símptomes

**CONSENTIMENT ESPECÍFIC DONANT PC COVID-19**

**QÜESTIONARI DONACIÓ (R-DI-001) (retornar emplenat el dia de la plasmafèresi)**

**CONSENTIMENT INFORMAT PLASMAFÈRESI (R-DI-006)**

**VALORACIÓ ACCESSOS VENOSOS**

**ANALÍTICA**

- Petició anàlisi: R-DI-004. (Observacions: Plasma convaléscent COVID-19)
- 2 TUBS EDTA
- 1 TUB SÈRUM 10 ml
- 1 TUB SÈRUM 5ml

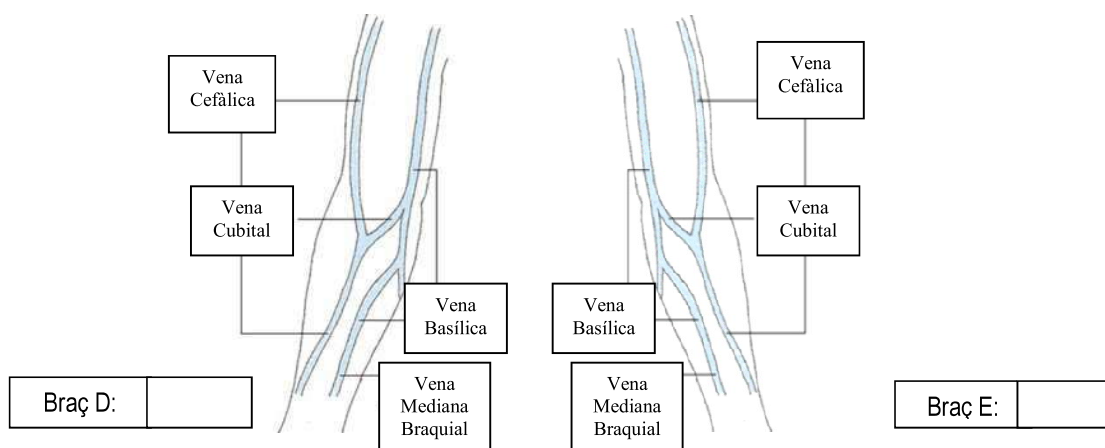

|                                                                             |                                                                             |
|-----------------------------------------------------------------------------|-----------------------------------------------------------------------------|
| Metge que fa la valoració (inicials: nom i cognoms):<br>Signatura:<br>Data: | DUI/s que fa la valoració (inicials: nom i cognoms):<br>Signatura:<br>Data: |
|-----------------------------------------------------------------------------|-----------------------------------------------------------------------------|



**2.- Avaluació dels resultats analítics:**

| PROVA                                                    | DATA EXTRA | CONFORMITAT |
|----------------------------------------------------------|------------|-------------|
| ABO/Rh(D)                                                |            |             |
| EAI                                                      |            |             |
| Serologies (VHB, VHC, VIH, Iues, HTLV I/II)              |            |             |
| Altres serologies (T.cruzi, T.pallidum, WNV, etc.)       |            |             |
| Proteïnes totals, IgG, IgM, IgA                          |            |             |
| Anticossos anti-SARS-CoV-2 IgG/IgA/IgM<br>NAT SARS-CoV-2 |            |             |
| Ac anti-HLA, Ac anti_HNA                                 |            |             |

**3.- Donant apte per afèresi:**SI  NO 

|             |
|-------------|
| Comentaris: |
|-------------|

|                                                        |
|--------------------------------------------------------|
| Metge que fa la valoració (inicials de nom i cognoms): |
| Signatura:                                             |
| Data:                                                  |

**Annex 1.4: Convalescent label template E9744**

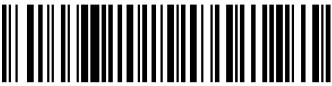

E002520123454 

**Banc de Sang i Teixits**

Edifici Dr. Frederic Duran i Jorda  
Pg. Taulat, 106-116  
08005 Barcelona

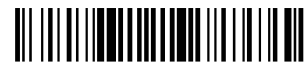

0200901141  
Extret: 30 Mar 2020 11:41

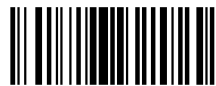

5100  
**O**

**Rh-D POSITIU**

ESCRUTINI ANTICOSSOS IRREGULARS NEGATIU

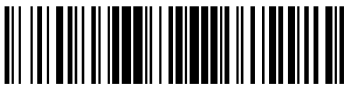

**E9744VA0**  
**PLASMA INACT BM CONV F1**

Inactivat amb blau de metilè  
Volumen: 150 mL

Descongelar+37°C No tornar a congelar  
Usar filtre de 170-200 µm  
Us exclusiu pacients confirmats COVID-19  
Producte exclusiu per investigació  
Procedent d'afèresi. Anticoagulant: ACD  
Conservar a temperatura <= - 25°C  
SEROLOGIA I NAT DE VHB,VHC I VIH: NEG  
SEROL. SÍFILIS: NEGATIVA

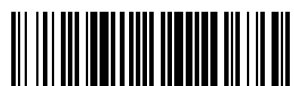

0230892359  
Caduca el 30 Mar 2023 23:59

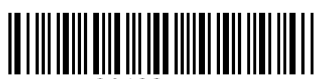

20123454



E002520123454 

**Banc de Sang i Teixits**

Edifici Dr. Frederic Duran i Jorda  
Pg. Taulat, 106-116  
08005 Barcelona

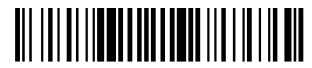

0200901141  
Extret: 30 Mar 2020 11:41

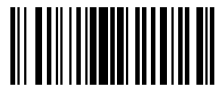

5100  
**O**

**Rh-D POSITIU**

ESCRUTINI ANTICOSSOS IRREGULARS NEGATIU

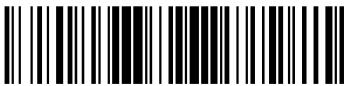

**E9744VB0**  
**PLASMA INACT BM CONV F2**

Inactivat amb blau de metilè  
Volumen: 200 mL

Descongelar+37°C No tornar a congelar  
Usar filtre de 170-200 µm  
Us exclusiu pacients confirmats COVID-19  
Producte exclusiu per investigació  
Procedent d'afèresi. Anticoagulant: ACD  
Conservar a temperatura <= - 25°C  
SEROLOGIA I NAT DE VHB,VHC I VIH: NEG  
SEROL. SÍFILIS: NEGATIVA



0230892359  
Caduca el 30 Mar 2023 23:59



20123454

**Annex 1.5: Methylene Blue Inactivation process**

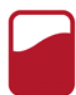

**TÍTOL: INACTIVACIÓ DE PLASMA FRESC AMB BOSSES “MACO-PHARMA”**

**ÍNDEx**

**1.- OBJECTIU**

**2.- REFERÈNCIES**

**3.- RESPONSABILITATS**

**4.- MATERIAL**

**5.- MÈTODE**

**6.- MEDI AMBIENT**

**7.- PREVENCIÓ DE RISCOS**

**8.- DOCUMENTS I REGISTRES**

**9.- MODIFICACIONS DEL DOCUMENT**

**10.- ANNEX**

**ELABORA :**

Sra. S. Cusco Hernández  
Sra. M. Coch Pérez  
Sra. I. Salguero Prieto

**Data :** 21/12/15

**REVISA :**

Sra. N. Martinez Llonch  
Sra. E. Valdivia Garcia  
Sra. E. Lizandra Monclús

**Data :** 22/12/15

**APROVA :**

Sr. R. Fernández Trujillo

**Data :** 22/12/15

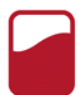

## TÍTOL: INACTIVACIÓ DE PLASMA FRESC AMB BOSSES “MACO-PHARMA”

### 1.- OBJECTIU

Descriure la sistemàtica emprada en el BST per fer la inactivació viral del plasma fresc de donant de sang total o d'afèresi (apte per a la transfusió) mitjançant l'acció antiviral del blau de metilè sota l'acció de la llum, fent servir els equips de “Maco-Pharma”.

### 2.- REFERÈNCIES

- *Manual d'instruccions d'ús de l'equip rebutjable Maco-Pharma amb blau de metilè per a la inactivació vírica d'unitats de plasma de donant únic.*
- *Manual de l'operador del Sistema Maco-Tronic d'il·luminació amb llum groga.*

### 3.- RESPONSABILITATS

És responsabilitat del personal tècnic el correcte desenvolupament d'aquesta tècnica.

És responsabilitat del cap de l'àrea el control del correcte desenvolupament d'aquesta tècnica.

### 4.- MATERIAL

- Plasmes frescos obtinguts segons procediment **P-FR-007: Procés d'elaboració de components sanguinis**
- Plasmafèresis obtingudes en circuit tancat
- Equip Maco-Pharma amb blau de metilè
- Equip Maco-Pharma amb blau de metilè amb filtre
- Equip Maco-Pharma amb blau de metilè per afèresi
- Connector estèril TSCD-II
- Segellador
- Dispositius d'il·luminació:
  - Macotronic V4 o B2



## TÍTOL: INACTIVACIÓ DE PLASMA FRESC AMB BOSSES “MACO-PHARMA”

### 5.- MÈTODE

#### 5.1.- Inactivació del plasma

##### 5.1.1.- Consideracions prèvies

- Seleccionar les unitats de plasma / plasmafèresi en circuit tancat a inactivar procurant que compleixin les següents condicions:

- Plasma d'home (identificat amb gomet verd des de la donació i verificat a l'entorn de treball que és Home).
- D'aspecte clar i translúcid en la inspecció visual. No són aptes les bosses lipèmiques, hemolitzades o amb contaminació d'hematies. La prova de comprovació és que sobre un fons fosc es vegi l'etiqueta de la bossa.
- Volum del plasma procedent de sang total entre **235 i 315 ml** (pes brut comprès entre 275 i 350 g), i procedent d'afèresi entre **470 i 630 ml**. (pes brut comprès entre 535 i 695 g).

- Anotar les dades en el registre informàtic **R-FR-053: Registre control plasmes per inactivar**.

- Desembalar l'equip d'inactivació amb blau de metilè immediatament abans del seu ús. Només el que es necessiti en aquell moment, per tal d'evitar possibles contaminacions.

#### PROCEDIMENT PER A PLASMES PROCEDENTS DE SANG TOTAL

- Tancar la pinça de plàstic de l'equip de blau de metilè.

- D'acord amb la tècnica **T-FR-019: Connectar tubs de bossa en circuit tancat sistema TSCD-II**, fer la connexió entre la bossa de plasma i l'equip d'inactivació tan a prop del final de la tubuladura de la bossa com sigui possible, procurant que la pinça blava estigui el més pròxim al filtre.

- Posar l'etiqueta d'identificació de núm. d'unitat, ubicada a la part baixa de la bossa, a la solapa de la bossa d'il·luminació.



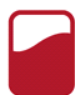

## TÍTOL: INACTIVACIÓ DE PLASMA FRESC AMB BOSSES “MACO-PHARMA”

- Penjar la bossa de plasma d'un suport adient, deixant la/es bossa/es receptora/es en posició inferior i aprofitant tota la llargada que permeti la tubuladura, obrir la pinça blava i trencar el frangible. El plasma es filtra per gravetat abans d'entrar a la bossa final d'il·luminació.

**NOTA:** A mesura que el plasma es va filtrant es va barrejant amb la pastilla de blau de metilè que conté l'equip d'inactivació. Finalment el plasma adopta una coloració verdosa després de mesclar-se amb el blau de metilè.

- Deixar fluir el plasma fins a la bossa d'il·luminació.
- Barrejar el plasma amb el blau de metilè invertint la bossa tres vegades com a mínim.
- Treure l'aire de la bossa inferior estrenyent-la fins que l'aire arribi al filtre.
- Segellar el tub amb la barreja de plasma amb blau de metilè tan a prop de la bossa com sigui possible. No rebutjar la bossa inicial del plasma; mantenir-la unida a la unitat a inactivar fins que el procés d'il·luminació sigui acabat.

**IMPORTANT:** *No poden passar més de 90 minuts entre la barreja amb el colorant i la il·luminació.*

### PROCEDIMENT PER AFÈRESI

- Es connecta la bossa de plasmafèresi amb el kit d'inactivació de blau de metilè per plasmafèresi, d'acord amb la tècnica **T-FR-019: Connectar tubs de bossa en circuit tancat Sistema TSCD II.**
- Posar l'etiqueta d'identificació de núm. d'unitat, ubicada a la part baixa de la bossa, a la solapa de la bossa d'il·luminació.
- Trencar el frangible per facilitar la filtració de la plasmafèresi i el transvasament de plasma cap a la bossa de procés de l'equip. Una vegada tot el plasma està a la bossa de procés es trenquen els frangibles que connecten la bossa de procés amb les bosses d'il·luminació. El volum de la plasmafèresi es divideix equitativament entre aquestes dues bosses d'il·luminació.



## TÍTOL: INACTIVACIÓ DE PLASMA FRESC AMB BOSSES “MACO-PHARMA”

- Seguidament es fa un segment (el més pròxim possible a la bossa d'il·luminació) a la tubuladura que connecta la bossa de procés amb la bossa d'il·luminació. Es rebutja la bossa de procés però guardant la bossa mare de la plasmafèresi.

**IMPORTANT: No poden passar més de 90 minuts entre la barreja amb el colorant i la il·luminació.**

- Durant el procés d'il·luminació, col·locar la bossa inicial del plasma / plasmafèresi, que conserva l'etiqueta amb el codi de barres, sota la solapa de cada bossa receptora.

### 5.1.2.- Inactivació

- Col·locar les bosses a il·luminar tal com indica el manual d'operació de cadascun dels aparells d'il·luminació.

### 5.1.3.- Post-il·luminació

- En acabar la il·luminació el sistema Macotronic edita una etiqueta adhesiva que indica com ha anat el procés d'inactivació (vàlida / No vàlida) enganxarem a la bossa final de plasma inactivat. En el cas que no fos possible treure l'etiqueta, s'escriu a la bossa del plasma una “I”.

### 5.1.4.- Consideracions a posteriori

Per les plasmafèresis:

- S'obté una bossa amb el plasma inactivat unida mitjançant una tubuladura a un filtre (reté l'excés de blau de metilè) i a una bossa satèl·lit final.
- Penjar la bossa inactivada en un carro habilitat per tal funció.
- Obrir el clamp que hi ha entre la bossa d'inactivació i el filtre. El plasma es va filtrant i passant a la bossa final per gravetat.
- Anotar els plasmes inactivats en el registre informàtic de bosses inactivades, **R-FR-031: Registre inactivació dels plasmes.**



## TÍTOL: INACTIVACIÓ DE PLASMA FRESC AMB BOSSES “MACO-PHARMA”

### 5.1.5.- Congelació del plasma

- Procedir a la congelació del plasma tal i com es descriu a la **T-FR-008: Congelació de plasmes**.

### 5.2.- Verificació del procés d'il·luminació

Si el procés d'inactivació no ha estat correcte les bosses es rebutgen, retolant la causa de rebuig i posant-les a la caixa retolada “*Unitats amb incidència*” de Fraccionament del dia d'extracció que pertanyi la unitat.

### 5.3.- Manteniment

Per tal de dur a terme els manteniments dels aparells, s'ha de dur a ter la **T-FR-036: Manteniment dels il·luminadors Macotronic** i registra-ho en el full corresponent, **R-FR-032: Registre de manteniment l'il·luminador Macotronic**.

## 6.- MEDI AMBIENT

En el cas de generació de residus aquests s'han de tractar amb gestors autoritzats.

Si es genera algun residu nou, s'ha d'informar al més aviat possible a l'Àrea de Qualitat i Medi Ambient.

## 7.- PREVENCIÓ DE RISCOS

En les tasques on es manipulen productes biològics és obligatori l'ús dels guants de nitril.



## TÍTOL: INACTIVACIÓ DE PLASMA FRESC AMB BOSSES “MACO-PHARMA”

### 8.- DOCUMENTS I REGISTRES

Procediment relacionat:

**P-FR-007:** Procés d'elaboració de components sanguinis

Tècniques relacionades:

**T-FR-008:** Congelació de plasmes

**T-FR-019:** Connectar tubs de bossa en circuit tancat sistema TSCD-II

**T-FR-036:** Manteniment dels il·luminadors Macotronic

Registres relacionats:

**R-FR-031:** Registre inactivació dels plasmes

**R-FR-032:** Registre de manteniment l'il·luminador Macotronic

**R-FR-053:** Registre control plasmes per inactivar

### 9.- MODIFICACIONS DEL DOCUMENT

| NÚMERO<br>VERSIÓ | DATA<br>APROVACIÓ | HISTÒRIC MODIFICACIONS DEL DOCUMENT                                                                                                                                                                                                                                                                                                                                                                                                        |
|------------------|-------------------|--------------------------------------------------------------------------------------------------------------------------------------------------------------------------------------------------------------------------------------------------------------------------------------------------------------------------------------------------------------------------------------------------------------------------------------------|
| 2                | 20/10/2000        | S'ha modificat l'apartat <b>4.1.13</b> per incorporar la realització de la còpia de seguretat. També ha canviat la forma d'identificació de la persona que fa la inactivació. S'han revisat els pesos inferior i superior de les unitats de plasma per inactivar. S'ha afegit l'anotació de l'hora de finalització de la filtració a les bosses per poder controlar el temps transcorregut fins a la inactivació (apartat <b>4.1.11</b> ). |
| 3                | 30/03/2001        | En l'anotació de l'hora de finalització de la filtració, quan es treballa amb un bloc de bosses només cal anotar-la a la primera bossa (apartat <b>4.1.11</b> ).                                                                                                                                                                                                                                                                           |



**TÍTOL: INACTIVACIÓ DE PLASMA FRESC AMB BOSSES “MACO-PHARMA”**

|   |            |                                                                                                                                                                                                                                                                                                                                                                             |
|---|------------|-----------------------------------------------------------------------------------------------------------------------------------------------------------------------------------------------------------------------------------------------------------------------------------------------------------------------------------------------------------------------------|
| 4 | 08/11/2002 | Es modifica el redactat dels punts <b>4.1.13.6</b> i <b>4.1.13.7.</b> i s'afegeix el <b>4.1.13.8</b> i <b>4.1.13.9.</b>                                                                                                                                                                                                                                                     |
| 5 | 02/03/2010 | <b>6.1</b> Canvis en les tècniques que es fa referència.<br><b>6.2</b> S'han afegit els kits d'inactivació de plasma amb filtre i el kit d'inactivació de plasmafèresi.                                                                                                                                                                                                     |
| 6 | 26/01/2011 | S'ha afegit la tècnica de manteniment <b>T-FR-036: Manteniment dels il·luminadors Macotronic.</b><br>S'han incorporat el registre d'inactivació dels plasmes el <b>R-FR-031: Registre inactivació dels plasmes</b> i el registre per al control visual dels plasmes el <b>R-FR-053: Registre control plasmes per inactivar.</b>                                             |
| 7 | 04/03/2013 | S'ha eliminat la realització d'una còpia de l'etiqueta de núm. d'identificació de la unitat, s'ha substituït per la segona etiqueta adherida a la part baixa de la bossa en el moment de la donació.<br>S'han incorporat els següents punts:<br><b>8.- MEDI AMBIENT</b><br><b>9.- PREVENCIÓ DE RISCOS</b>                                                                   |
| 8 | 19/03/2013 | S'aclareix que l'únic plasma que es pot fer servir és el d'home i amb gomet verd provenint des de la donació i un cop verificat a l'entorn de treball.<br>Es treu l' <b>Annex 3.</b><br>Es canvia el model de maquinaria de Macotronic Vilver Lourmat a Macotronic V4.<br>Es modifica el temps màxim de la barreja del plasma amb el blau de metilè de 3 hores a 90 minuts. |
| 9 | 22/12/2015 | S'afegeix maquinaria V2, a més a més, de V4.<br>S'han incorporat els següents punts:<br><b>3.- RESPONSABILITATS.</b><br><b>10.- ANNEX. INSTRUCCIÓ DE TREBALL</b>                                                                                                                                                                                                            |

**10.- ANNEX**

**TÍTOL: INACTIVACIÓ DE PLASMA FRESC AMB BOSSES “MACO-PHARMA”**

**10.- ANNEX. INSTRUCCIÓ DE TREBALL**

**INACTIVACIÓ DE PLASMA FRESC I AFÈRESIS.**

**OBJECTIU**

Inactivació viral del plasma fresc o afèresi per ús transfusional

**MÈTODE**

- Unitats de pf i pfa circuit tancat
- Pf d'home de gomet verd, no transfós.
- Aspecte clar i translúcid que es transparenti l'etiqueta.
- Volum: pf 235-315 ml (275-350 g) pfa 470-630 ml (535-695 g)

**PROCEDIMENT**

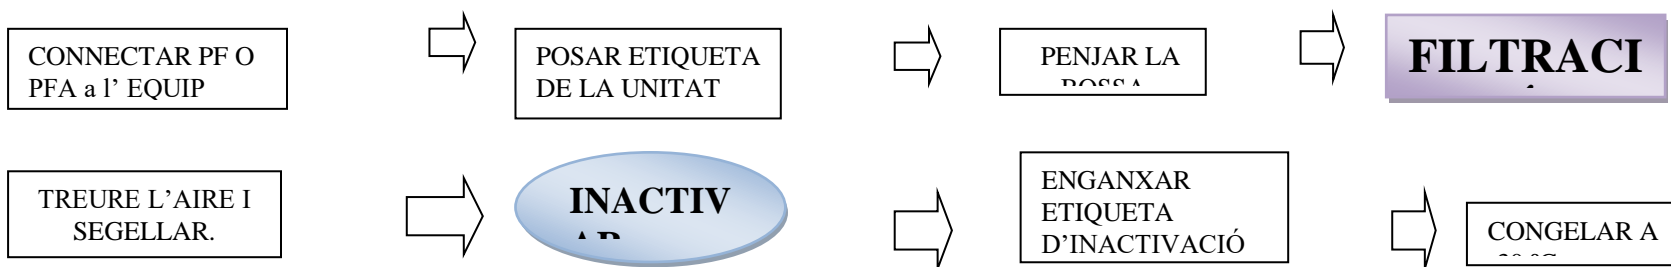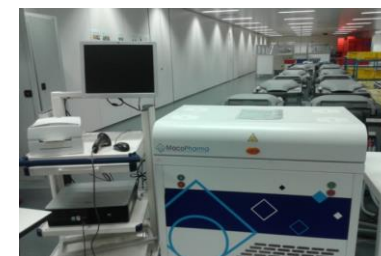

EN EL CAS DE LES AFÈRESIS DEPURADES, UN COP INACTIVADES, L'EQUIP ESPECÍFIC PERMET  
EFFECTUAR EL PROCÉSS DE INACTIVACIÓ

**NO PODEN PASSAR MÉS DE 90 MINUTS ENTRE LA BARREJA AMB EL COLORANT I LA IL·LUMINACIÓ**

**Annex 5: Hemovigilance: detection, assessment and register of incidents related to transfusion**

|                                                                                                                     |                                   |                                                                                  |
|---------------------------------------------------------------------------------------------------------------------|-----------------------------------|----------------------------------------------------------------------------------|
|  <b>BANC DE SANG<br/>I TEIXITS</b> | <b>MANUAL DE<br/>PROCEDIMENTS</b> | Codi: <b>P-TR-024</b><br>Revisió: 5<br>Data : 18 de novembre 2016<br>Pàgina 1/10 |
|---------------------------------------------------------------------------------------------------------------------|-----------------------------------|----------------------------------------------------------------------------------|

**TÍTOL: HEMOVIGILÀNCIA: DETECCIÓ, VALORACIÓ I REGISTRE DELS  
INCIDENTS RELACIONATS AMB LA TRANSFUSIÓ**

**ÍNDEX**

- 1.- OBJECTE**
- 2.- ABAST**
- 3.- REFERÈNCIES**
- 4.- DEFINICIONS**
- 5.- RESPONSABILITATS**
- 6.- DESENVOLUPAMENT**
  - 6.1.- Comunicació i/o identificació del problema**
  - 6.2.- Accions urgents pròpies dels efectes desfavorables immediats**
  - 6.3.- Investigació dels incidents relacionats amb la transfusió**
  - 6.4.- Informe dels efectes adversos i comunicació al responsable mèdic del malalt**
  - 6.5.- Registre i control centralitzat dels incidents relacionats amb la transfusió**
  - 6.6.- Valoració dels incidents relacionats amb la transfusió**
- 7.- MEDI AMBIENT**
- 8.- PREVENCIÓ DE RISCOS**
- 9.- DOCUMENTS I REGISTRES**
- 10.- MODIFICACIONS DEL DOCUMENT**

|                                                                                                   |                                                                                                                              |                                                                    |
|---------------------------------------------------------------------------------------------------|------------------------------------------------------------------------------------------------------------------------------|--------------------------------------------------------------------|
| <b>ELABORA:</b><br>Dra. L. Ramiro Infante<br>Sra. E. Lencero Pantoja<br><br><b>Data:</b> 18/11/16 | <b>REVISA:</b><br>Comissió de Transfusió<br>(Dra. P. Ortiz Murillo)<br>Sra. E. Lizandra Monclús<br><br><b>Data:</b> 24/01/17 | <b>APROVA:</b><br>Dr. Ll. Puig Rovira<br><br><b>Data:</b> 25/01/17 |
|---------------------------------------------------------------------------------------------------|------------------------------------------------------------------------------------------------------------------------------|--------------------------------------------------------------------|

**CÒPIA CONTROLADA VÀLIDA NOMÉS EN EL GESTOR DOCUMENTAL.**



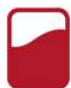

## TÍTOL: HEMOVIGILÀNCIA: DETECCIÓ, VALORACIÓ I REGISTRE DELS INCIDENTS RELACIONATS AMB LA TRANSFUSIÓ

### 1.- OBJECTE

Descriure la metodologia per detectar, registrar i analitzar tota la informació relativa als incidents i reaccions adverses que es produeixen en el tram final de la cadena transfusional, dintre de l'àmbit hospitalari, en la capçalera del pacient.

### 2.- ABAST

Les transfusions fetes en els centres on el BST és titular del servei de transfusió.

### 3.- REFERÈNCIES

- *Document elaborat pel grup d'hemovigilància i presentat a la Jornada d'hemovigilància. Ministeri de Sanitat. Madrid 2002.*
- *Manual de Notificació d'Hemovigilància del Departament de Salut, octubre 2004, amb els impresos per a la notificació al Registre d'Hemovigilància de Catalunya.*
- *Manual de l'usuari de l'aplicatiu d'Hemovigilància.*
- *Estándares de Acreditación en Transfusión Sanguínea. CAT 4ª edición 2012*
- *Capítols 7 i 8 del Manual de Qualitat i Medi Ambient (Elaboració del producte i Millora contínua).*
- *Guía sobre la transfusión de componentes sanguíneos y derivados plasmáticos. 5ª edición. 2015. SETS*
- *Working party on haemovigilance. International Haemovigilance Network. ISBT. 2011*

### 4.- DEFINICIONS

**Hemovigilància:** Conjunt de procediments organitzats de vigilància relatius als incidents i reaccions adverses inesperades que poden produir-se al llarg de tota la cadena transfusional amb l'objectiu de prevenir i tractar la seva aparició o recurrència.

**CÒPIA CONTROLADA VÀLIDA NOMÉS EN EL GESTOR DOCUMENTAL.**



## TÍTOL: HEMOVIGILÀNCIA: DETECCIÓ, VALORACIÓ I REGISTRE DELS INCIDENTS RELACIONATS AMB LA TRANSFUSIÓ

### Reacció adversa a la transfusió:

Resposta nociva i inesperada en el pacient, en relació a la transfusió de la sang o dels seus components.

Depenent del temps d'aparició, es diferencia en:

- **Reacció transfusional immediata:** els signes i símptomes apareixen durant l'acte transfusional fins a 24 hores després del mateix.
- **Reacció transfusional tardana:** els signes i símptomes apareixen més enllà de les 24 hores de l'acte transfusional.

### Incident relacionat amb la transfusió sanguínia:

- **Error en l'administració de components:** episodi en el què un pacient ha estat transfós amb un component sanguini que no compleix amb els requisits idonis o bé que estava destinat a un altre pacient.
- **Incident sense efecte o quasi-incident:** qualsevol error què, si no s'hagués detectat a temps, hauria produït un error d'administració.

## 5.- RESPONSABILITATS

És responsabilitat de l'infermer/a i del metge del Servei de Transfusió el desenvolupament d'aquest procediment.

El cap mèdic de la unitat és a més el responsable de controlar el correcte desenvolupament de les activitats descrites en aquest procediment.

## 6.- DESENVOLUPAMENT



## TÍTOL: HEMOVIGILÀNCIA: DETECCIÓ, VALORACIÓ I REGISTRE DELS INCIDENTS RELACIONATS AMB LA TRANSFUSIÓ

### 6.1.- Comunicació i/o identificació del problema

- Els conceptes de les diferents reaccions adverses a la transfusió i dels incidents transfusionals (errors d'administració d'un component sanguini i d'incident sense efecte o quasi-incident), estan definits en el *Manual de Notificació d'Hemovigilància del Departament de Salut, octubre 2004*.

#### 6.1.1.- Hospitals on el servei de Transfusió és titularitat del BST i aquest es troba ubicat en les instal·lacions del mateix

Reaccions adverses i incidents relacionats amb la transfusió sanguínia (errors d'administració de components sanguinis i quasi-incident)

La informació pot arribar al servei de transfusions a través del personal d'hospitalització, telefònicament, amb l'*Imprès 1HV del Departament de Salut: Notificació de reacció transfusional*, amb l'*imprès de reacció adversa* disponible a l'aplicatiu SAP, o a través de la intranet de l'Hospital.

Si es detecta una possible reacció adversa, s'intenten confirmar les dades clíniques amb el personal responsable del malalt, intentant descartar altres possibles causes i si es confirma, es registra en el precitat *Imprès 1HV* o a l'*imprès de SAP*.

---

*NOTA: Els hospitals que es disposi de SAP han de notificar les reaccions adverses a través del mateix, sempre que sigui possible, per tal de deixar constància a la història clínica del pacient.*

---

---

*NOTA: En cas de caiguda del sistema informàtic, el pla de contingència de la transfusió vetllarà per garantir la traçabilitat i el programa d'Hemovigilància, per la qual cosa es lliurarà amb la unitat a transfondre el registre **R-TR-046: Full de traçabilitat** o el full de confirmació de la transfusió d'eProgesa o el registre propi de cada centre, on es constatarà si s'ha detectat cap incident relacionat amb la transfusió.*

---



## TÍTOL: HEMOVIGILÀNCIA: DETECCIÓ, VALORACIÓ I REGISTRE DELS INCIDENTS RELACIONATS AMB LA TRANSFUSIÓ

### 6.1.2.- Hospitals on el servei de Transfusió és titularitat del BST, sense estar ubicat en les instal·lacions del mateix (Direccions Tècniques)

La persona que controla l'evolució de la transfusió del malalt quan finalitza la transfusió de cada component sanguini, emplena el **R-TR-042: Full de control d'hemovigilància o altre imprès adaptat a cada hospital**. Cas de no detectar cap reacció, ni error en l'administració del component sanguini, marca la resposta NO. En cas contrari, marca la resposta SI i emplena les dades de la segona plana.

Posteriorment fa arribar el registre al servei de transfusió del BST corresponent, seguint el circuit establert per cada centre.

El metge responsable del servei de transfusió del BST valora les comunicacions, fa les investigacions pertinents per tal de poder clarificar els fets i si es tracta d'un incident relacionat amb la transfusió, inicia totes les actuacions que es descriuen en els apartats 6.2 a 6.6.

La informació pot arribar al servei de transfusions també a través del personal d'hospitalització, telefònicament o amb el precitat *Imprès1*.

### 6.2.- Accions urgents pròpies dels efectes desfavorables immediats

Quan el servei de transfusió té coneixement d'una reacció adversa immediata, cal informar al personal sanitari responsable del malalt de les següents mesures:

- ATURAR LA TRANSFUSIÓ
- Mantenir permeable la via amb solució salina fisiològica 0.9%
- Avisar al metge responsable del malalt
- Verificar tots els registres: les etiquetes i identificacions del producte transfós i del pacient, per determinar si aquest ha rebut un component incorrecte
- Mesurar i anotar les constants (tensió arterial, freqüència cardíaca, pols, freqüència respiratòria), si la clínica del pacient ho aconsella.
- Notificar la reacció adversa apareguda al servei de transfusió mitjançant *el registre d'hemovigilància* disponible a l'aplicatiu SAP o a través de la intranet hospitalària. En cas de no tenir aquest aplicatiu, fer la notificació a través de l'*Imprès 1 del Departament de Salut: Notificació de reacció transfusional o del R-TR-042: Full de control d'hemovigilància* o altre imprès adaptat a cada hospital.



## TÍTOL: HEMOVIGILÀNCIA: DETECCIÓ, VALORACIÓ I REGISTRE DELS INCIDENTS RELACIONATS AMB LA TRANSFUSIÓ

Seguir les recomanacions del manual **M-TR-005: Maneig de les complicacions agudes de la transfusió** i del llistat **L-TR-017: Incidentes relacionats amb la transfusió** on especifica el procediment d'actuació a seguir segons el tipus d'incident.

### 6.3.- Investigació dels incidents relacionats amb la transfusió

Les accions posteriors depenen de cada tipus d'incident i es troben especificades en el *Manual de Notificació d'Hemovigilància del Departament de Salut, octubre 2004*, en el manual **M-TR-005: Maneig de les complicacions agudes de la transfusió** i en el llistat **L-TR-017: Incidentes relacionats amb la transfusió**. Els resultats de les determinacions s'anoten al **R-TR-022: Full de laboratori de reacció transfusional** o als impresos en vigor establerts pel Departament de Salut.

En cas de ser necessari un estudi més complet de la reacció, les mostres de sang seran registrades de manera informàtica i enviades per valisa interna al Laboratori d'Immunohematologia de referència; en cas de no poder-les registrar al sistema informàtic, seran enviades juntament amb el **R-IM-001: Full de petició d'Immunohematologia**.

### 6.4.- Informe dels efectes adversos i comunicació al responsable mèdic del malalt

En aquells casos en què el metge o el servei d'infermeria del malalt hagi comunicat la complicació al servei de transfusió i sempre que aquesta tingui transcendència clínica o es puguin establir mesures per a la seva prevenció, el servei de transfusió del BST ho farà constar a la història clínica del malalt, directament o mitjançant un informe escrit amb el **R-TR-041: Informe d'incident relacionat amb la transfusió** dirigit al metge responsable del malalt.

### 6.5.- Registre i control centralitzat dels incidents relacionats amb la transfusió

Els responsables dels serveis de transfusió del BST han de notificar els incidents (errors d'administració i quasi-incidentes) i les reaccions adverses de la transfusió al sistema d'Hemovigilància de Catalunya. Aquesta notificació es pot

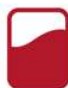

## TÍTOL: HEMOVIGILÀNCIA: DETECCIÓ, VALORACIÓ I REGISTRE DELS INCIDENTS RELACIONATS AMB LA TRANSFUSIÓ

efectuar mitjançant el programa aplicatiu d'Hemovigilància en l'Entorn de Treball del BST segons el **M-TR-002: Manual usuari hemovigilància** o en els impresos d'Hemovigilància en vigor establerts pel Departament de Salut, enviant-los al registre d'hemovigilància del BST, que posteriorment els envia a l'administració sanitària competent.

Els serveis de transfusió del BST vetllen perquè als serveis de transfusió on el BST porta la Direcció Tècnica es porti a terme un programa d'hemovigilància. Aquests serveis faran les seves notificacions mitjançant els formularis clàssics fins que disposin de l'aplicatiu informàtic segons el **M-TR-002: Manual usuari hemovigilància**.

### 6.6.- Valoració dels incidents relacionats amb la transfusió

En els incidents en l'administració de components sanguinis (errors i quasi-incidentes) i en les reaccions adverses en les que sigui factible, s'han d'implementar mesures correctores per evitar reincidències. Aquestes mesures s'han de documentar, s'han de mantenir els registres de les accions correctores fetes i el seguiment de l'eficàcia.

El comitè hospitalari de transfusió participarà en la implantació de les mesures correctores, així com en el seguiment del grau de compliment i eficàcia de les mateixes.

Periòdicament la Comissió d'Hemovigilància del BST analitza els incidents registrats en els diferents centres territorials, i proposa accions correctores, preventives i de millora, per intentar evitar la seva reaparició. Aquestes accions es traslladen a la Comissió Transversal de Transfusió (CTT) o al Comitè de Centres (CC), segons l'àmbit on s'haurà d'actuar, és a dir, actuacions que afecten als serveis de transfusió es valoren i s'adopten mesures unificades des de la CTT, actuacions que impliquen als hospitals (personal hospital, direcció, ...) es debaten i s'acorden les possibles mesures al CC.

### 7.- MEDI AMBIENT

No aplica.



## TÍTOL: HEMOVIGILÀNCIA: DETECCIÓ, VALORACIÓ I REGISTRE DELS INCIDENTS RELACIONATS AMB LA TRANSFUSIÓ

### 8.- PREVENCIÓ DE RISCOS

En les tasques on es manipulen productes sanguinis és obligatori l'ús dels guants de nitril.

Al realitzar les tasques amb pantalles de visualització de dades cal tenir present les mesures higièniques i ergonòmiques per evitar la fatiga física i visual.

A l'interactuar amb el personal sanitari de l'hospital, i al recollir les seves percepcions cal empatia i mantenir una actitud receptiva i positiva, evitant donar informacions no verificades i no valorar opinions, amb aquestes pautes evitarem càrregues psicossocials.

### 9.- DOCUMENTS I REGISTRES

Manual de Notificació d'Hemovigilància del Departament de Salut:

**DE-04-005:** Manual de Notificació d'Hemovigilància del Departament de Salut, octubre 2004

Els manuals relacionats són:

- **M-TR-002:** Manual usuari hemovigilància
- **M-TR-005:** Maneig de les complicacions agudes de la transfusió

Impresos d'Hemovigilància del Departament de Salut:

**DE-04-006:** Imprès\_1HV\_Notificació de reacció transfusional

**DE-04-007:** Imprès\_2HV\_Notificació d'un incident relacionat amb la transfusió

**DE-04-008:** Imprès\_5HV\_Notificació d'incident sense efecte (quasi incident)

**DE-04-009:** Imprès\_6HV\_Notificació dels errors en l'administració de components

**DE-04-010:** Imprès\_7HV\_Notificació de reaccions hemolítiques

**DE-04-011:** Imprès\_8HV\_Notificació de reacció al·lèrgica / anafilàctica

**DE-04-012:** Imprès\_9HV\_Notificació d'infecció bacteriana

**CÒPIA CONTROLADA VÀLIDA NOMÉS EN EL GESTOR DOCUMENTAL.**

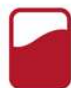

**TÍTOL: HEMOVIGILÀNCIA: DETECCIÓ, VALORACIÓ I REGISTRE DELS INCIDENTS RELACIONATS AMB LA TRANSFUSIÓ**

- DE-04-013:** Imprès\_10HV\_Notificació d'edema pulmonar
- DE-04-014:** Imprès\_11HV\_Notificació de púrpura posttransfusional
- DE-04-015:** Imprès\_12HV\_Notificació de malaltia de l'empelt contra l'hoste
- DE-04-016:** Imprès\_13HV\_Notificació d'infecció posttransfusional
- DE-04-017:** Imprès\_14HV\_Notificació de reacció febril i/o hipotensió
- DE-04-018:** Imprès\_15HV\_Notificació d'hemosiderosi transfusional
- DE-04-019:** Imprès\_16HV\_Notificació de reacció inclassificable

Registres relacionats:

- R-IM-001:** Full de petició d'Immunohematologia
- R-TR-022:** Full de laboratori de reacció transfusional
- R-TR-041:** Informe d'incident relacionat amb la transfusió
- R-TR-042:** Full de control d'hemovigilància
- R-TR-046:** Full de traçabilitat

Llistat relacionat:

- L-TR-017:** Incidentes relacionats amb la transfusió

## 10.- MODIFICACIONS DEL DOCUMENT

| NÚMERO<br>VERSIÓ | DATA<br>APROVACIÓ | HISTÒRIC MODIFICACIONS DEL DOCUMENT                                                                                                                                                                                                                                                                                                                                                                 |
|------------------|-------------------|-----------------------------------------------------------------------------------------------------------------------------------------------------------------------------------------------------------------------------------------------------------------------------------------------------------------------------------------------------------------------------------------------------|
| 2                | 04/10/2004        | Es fusiona en aquest procediment el <b>P-TR-015: Actuació davant una reacció transfusional</b> , que a partir d'aquest moment queda <b>obsolet</b> .<br>S'ha refet el mecanisme per realitzar l'hemovigilància, adoptant els criteris i registres establerts en el <i>Document elaborat pel grup d'hemovigilància i presentat a la Jornada d'hemovigilància. Ministeri de Sanitat. Madrid 2002.</i> |
| 3                | 11/11/2009        | Es fa referència a la notificació de les reaccions i efectes adversos detectats en els serveis de transfusió BST mitjançant un nou aplicatiu informàtic.                                                                                                                                                                                                                                            |
| 4                | 18/10/2013        | EL <b>L-TR-017: Incidentes relacionats amb la transfusió</b> i els registres: <b>R-TR-021: Full de registre de reacció transfusional</b> , <b>R-TR-043: Registre d'errors en</b>                                                                                                                                                                                                                    |

**CÒPIA CONTROLADA VÀLIDA NOMÉS EN EL GESTOR DOCUMENTAL.**



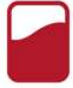

**TÍTOL: HEMOVIGILÀNCIA: DETECCIÓ, VALORACIÓ I REGISTRE DELS INCIDENTS RELACIONATS AMB LA TRANSFUSIÓ**

|   |            |                                                                                                                                                                                                                                                                                                                                                                                                                                                                                                                                                                                                                                                                                                                                                                                                                                                                                                                                                                                                                                                  |
|---|------------|--------------------------------------------------------------------------------------------------------------------------------------------------------------------------------------------------------------------------------------------------------------------------------------------------------------------------------------------------------------------------------------------------------------------------------------------------------------------------------------------------------------------------------------------------------------------------------------------------------------------------------------------------------------------------------------------------------------------------------------------------------------------------------------------------------------------------------------------------------------------------------------------------------------------------------------------------------------------------------------------------------------------------------------------------|
|   |            | <p>l'administració de components i <b>R-TR-044: Registre d'incidents sense efecte (quasi incidents)</b>, són substituïts pel <i>Manual de Notificació d'Hemovigilància del Departament de Salut, octubre 2004</i>, i els diferents Impresos d'Hemovigilància del Departament de Salut.</p> <p>S'ha suprimit l'apartat <b>6.3.- Documentació dels incidents relacionats amb la transfusió</b>, donat que queda inclòs a l'apartat de "<b>Registre i control centralitzat dels incidents relacionats amb la transfusió</b>".</p> <p>S'ha suprimit l'apartat <b>6.6.- Comptabilització</b>.</p> <p>S'ha incorporat l'apartat <b>6.6.- Valoració dels incidents relacionats amb la transfusió</b>.</p> <p>S'ha canviat el títol abans era "<b>HEMOVIGILÀNCIA</b>" i ara és "<b>HEMOVIGILÀNCIA: DETECCIÓ, VALORACIÓ I REGISTRE DELS INCIDENTS RELACIONATS AMB LA TRANSFUSIÓ</b>".</p> <p>S'han incorporat els següents punts:</p> <p><b>7.- MEDI AMBIENT</b></p> <p><b>8.- PREVENCIÓ DE RISCOS</b></p> <p><b>10.- MODIFICACIONS DEL DOCUMENT.</b></p> |
| 5 | 25/01/2017 | <p><b>3.- REFERÈNCIES:</b> S'amplien les referències.</p> <p><b>6.- DESENVOLUPAMENT.</b></p> <p><b>6.1.1.-:</b> S'afegeix que els hospitals que disposin de l'aplicatiu SAP han de notificar-ho a través del mateix, o a través de la intranet de l'hospital.</p> <p>S'afegeix l'actuació a seguir en cas de caiguda del sistema informàtic.</p> <p><b>6.2.-:</b> Es fa referència al llistat <b>L-TR-017: Incidents relacionats amb la transfusió</b> i al manual <b>M-TR-005: Maneig de les complicacions agudes de la transfusió</b>. S'afegeix com a mesura a prendre en cas de reacció adversa immediata: verificar tots els registres: etiquetes i identificacions del producte transfós i del pacient.</p> <p><b>6.3.-:</b> S'afegeix que en cas de ser necessari completar l'estudi de la reacció, enviar mostra al laboratori d'Immunohematologia.</p> <p><b>6.5.-:</b> Es fa referència al manual <b>M-TR-002: Manual usuari hemovigilància</b>.</p>                                                                                   |

## **Annex 6: Web content**

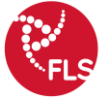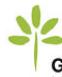

## **CONTENIDO WEB:**

### **Logos:**

- #YoMeCorono
- Germans Trias i Pujol Hospital
- Fundació Lluita Contra la Sida i les Malalties Infeccioses
- Banc de Sang i Teixits
- IrsiCaixa
- *Institut Català de la Salut. Gerència Territorial Metropolitana Nord*
- Grífols
- *Clínic Barcelona Hospital Universitari (pendents)*
- *Bellvitge Hospital Universitari (pendents)*
  
- *Consorti Sanitari Integral Hospital de Sant Joan Despí Moisès Broggi (pendents)*

**1. Inicio / 2. ¿Por qué colaborar? / 3. Estudio COnV-ert / 4. ¿Quiénes somos? / 5. ¡Participa!**



## **1. INICIO**

Si cumples estos tres criterios, puedes ser apto para el estudio. ¡Participa! ¡Ayúdanos!

1. **Positivo en COVID-19:** Si hace menos de 3 días que te han hecho el test PCR de COVID-19 y has dado positivo.
2. **Edad  $\geq$  50 años:** Si tienes 50 años o más.
3. **Sintomático:** Si tienes síntomas de COVID-19 que no requieren hospitalización, desde hace 5 días o menos.

Si cumples los tres criterios o no estás seguro de cumplir los tres, o aún tienes dudas, llámanos: 900431403

\*Horario de atención telefónica de lunes a viernes de 9 a 17h

### **Resumen ESTUDIO COnV-ert**

Estudio liderado por el Dr. Oriol Mitjà y el Dr. Bonaventura Clotet, con el objetivo de frenar la progresión de la COVID-19.

La emergencia COVID-19 exige el desarrollo urgente de nuevas estrategias para proteger a la población, principalmente a aquellas personas con mayor riesgo.

El estudio pretende evaluar la eficacia y la seguridad del tratamiento con plasma convaleciente en personas mayores de 50 años con enfermedad COVID-19 leve o moderada no hospitalizadas. El propósito de este estudio es ver si el tratamiento con plasma convaleciente puede funcionar como tratamiento precoz de la COVID-19 leve y moderada y frenar su progresión, así como disminuir la severidad y duración de sus síntomas.

El plasma es la parte líquida de la sangre, donde se encuentran suspendidas las células sanguíneas y contiene gran cantidad de proteínas, entre ellas anticuerpos o inmunoglobulinas, que protegen de infecciones. El plasma convaleciente es donado por personas que han superado la COVID-19 y contiene anticuerpos contra el virus SARS-CoV-2. Las hipótesis del estudio son que el tratamiento con plasma convaleciente complementaría y estimularía el sistema inmunitario de los enfermos con COVID-19, podría frenar la progresión de la enfermedad así como reducir la severidad y duración de sus síntomas.

La terapia con plasma se ha usado para tratar muchas otras afecciones y es segura.

La terapia con plasma convaleciente podría ser muy útil para toda la población, principalmente para aquellas personas de mayor edad o con factores de riesgo para desarrollar complicaciones de la COVID-19.



La participació de persones amb COVID-19 en l'estudi i la col·laboració de persones que han passat la COVID-19 com a donants de plasma és molt important per poder demostrar l'eficàcia del tractament i que, si funciona, pugui aplicar-se a la població general, ¡Os animamos a todos a participar!

Los promotores del estudio son la Fundación Lucha contra el Sida y el Hospital Universitario Germans Trias i Pujol, en coordinació con el Banco de Sangre y Tejidos de Catalunya y Grífols, con la col·laboració de Atención Primaria de la región *Metropolitana Nord*. El estudio se abrirá a otros centros hospitalarios de Cataluña durante las próximas semanas. EL estudio ha sido aprobado por el comité ético de investigación del Hospital Universitario Germans Trias i Pujol.

¡PARTICIPA EN EL ESTUDIO!



## **2. ¿POR QUÉ COLABORAR?**

**Ayúdanos, ¡Te necesitamos!**

**¡STOP CORONAVIRUS!**

Entre todos podemos pararlo.

### **Reto compartido**

Tenemos que conseguir más de 400 personas con la COVID-19 para realizar el estudio. Esto significa encontrar personas interesadas en este estudio y su finalidad, hacer las pruebas PCR para COVID-19 a todos los participantes, juntamente con una extracción sanguínea, administrar el plasma convaleciente o el placebo a cada unos y hacerles el seguimiento, haciendo una segunda prueba PCR el día 7, junto con una nueva extracción sanguínea. Logística y organizativamente es un reto importante.

### **Valor**

Si el estudio da los resultados esperados, tendremos una herramienta efectiva para frenar el virus. En unas semanas o meses se podría aplicar a todas las personas enfermas con características similares a las estudiadas.

### **Tipo de tratamiento y seguimiento médico**

El tratamiento que se utiliza en el estudio es el plasma convaleciente. Es un tratamiento que se ha utilizado para otras afecciones y es seguro. Durante su transfusión, un equipo sanitario estará presente en todo momento para valorar posibles efectos adversos.

Por otra parte, los participantes del estudio tendrán apoyo de nuestro equipo médico durante todo el seguimiento.



### **3. ESTUDIO COnV-ert**

La enfermedad del coronavirus 2019 (COVID-19) es una infección respiratoria causada por el virus SARS-CoV-2. La propagación descontrolada del coronavirus SARS-CoV-2 ha generado una emergencia sanitaria sin precedentes, sólo comparable a las pandemias de influenza de 1918 y 1957. Por el momento, no hay tratamientos efectivos para la COVID-19, por lo que se necesitan datos definitivos de estudios clínicos para encontrar tratamientos seguros y efectivos contra esta enfermedad. El desarrollo de vacunas avanza a un ritmo rápido, pero se estima que aún faltan por lo menos 6 meses hasta su disponibilidad generalizada. La emergencia COVID-19 exige el desarrollo urgente de nuevas estrategias para proteger a la población, principalmente a aquellas personas con mayor riesgo.

La terapia con plasma convaleciente se ha usado para tratar a pacientes con diferentes infecciones, utilizando plasma extraído de individuos recientemente recuperados para transferir inmunidad de anticuerpos pasivos a los que han sido infectados recientemente. El uso de plasma convaleciente se ha estudiado en brotes de otras infecciones respiratorias, incluidas la epidemia de SARS-CoV-1 de 2003, la pandemia del virus Influenza H1N1 2009-2010 y la epidemia de MERS-CoV-2 de 2012.

Nuestra hipótesis principal es que la administración precoz de plasma convaleciente en personas mayores de 50 años con enfermedad COVID-19 leve o moderada puede frenar la progresión de la enfermedad y disminuir la severidad de sus síntomas.

La Fundación Lucha contra el Sida y las Enfermedades Infecciosas y el Hospital Germans Trias i Pujol, junto con Banc de Sang i Teixits y Irsi-Caixa, han lanzado un estudio clínico dirigido a identificar un tratamiento eficaz y seguro para reducir la severidad de la COVID-19 y disminuir la severidad de sus síntomas. La intervención es en pacientes afectados por COVID-19 leve o moderada, no hospitalizados, a quienes se les administrará una infusión endovenosa de plasma convaleciente o placebo, con el objetivo de reducir la carga viral (la cantidad de virus en las secreciones respiratorias), reducir el ratio de hospitalizaciones después de 28 días de la administración y reducir la severidad y la duración de los síntomas de COVID-19.

En este estudio está prevista la participación de entre 450 y 500 personas diagnosticadas con infección por SARS-CoV-2 que se encuentren con enfermedad COVID-19 leve o moderada que no precise hospitalización, del área *Metropolitana Sud*, *Metropolitana Nord* y *Barcelona*. Este es un estudio aleatorizado. Habrá dos grupos de tratamiento que, de forma adicional al tratamiento pautado por su médico para COVID-19, recibirán plasma convaleciente o placebo. Cada participante puede ser asignado a recibir tratamiento experimental con plasma convaleciente o placebo. La asignación a un grupo u otro será al azar, como tirar un dado. Ni el equipo investigador ni usted sabrán a qué grupo le ha tocado. El plasma convaleciente y el



placebo tendrán una apariencia parecida y se administrarán de la misma forma: una administración hospitalaria mediante una infusión endovenosa de unos 30-40 minutos de duración.

El plasma es la parte líquida de la sangre, dónde se encuentran suspendidas las células sanguíneas y contiene gran cantidad de proteínas, entre ellas anticuerpos o inmunoglobulinas, que protegen de infecciones. El plasma convaleciente es donado por personas que han superado la COVID-19 y contiene anticuerpos contra el virus SARS-CoV-2. El placebo será una sustancia de apariencia parecida al plasma convaleciente, pero que no contiene ninguna sustancia activa y del que no se espera ningún efecto, en este caso será suero salino. La asignación a un grupo u otro será al azar. Ambos tratamientos se administran mediante una infusión endovenosa de unos 30-40 minutos de duración en un ámbito hospitalario.

La administración se realizará en el primer día del estudio, después de comprobar la compatibilidad del grupo sanguíneo. En esa visita, se realizará una exploración física y se obtendrán sus constantes vitales, se le realizará una extracción de sangre y se le tomará una muestra nasofaríngea. Esta primera visita hospitalaria tendrá una duración de aproximadamente 2 horas. Después de la administración, todos los pacientes serán seguidos hasta el día 60. Durante los primeros 14 días, los participantes se tomarán diariamente la temperatura en casa y completarán un cuestionario electrónico de síntomas diario. El equipo investigador, mediante una llamada telefónica el día 3, realizará un seguimiento telefónico. El día 7 serán visitados en domicilio por personal sanitario que tomará una muestra nasofaríngea y una muestra de sangre. Los días 14, 28 y 60 se realizará un seguimiento telefónico.

El estudio se realiza en coordinación con el el Banco de Sangre y Tejidos de Catalunya y Grífols. El estudio ha sido aprobado por el Comité Ético de Investigación del Hospital Universitario Germans Trias i Pujol. El protocolo del estudio ha sido incluido en un registro público, y puede ser consultado aquí:

*Clinicaltrials.gov.....*

Si se verifica la validez del tratamiento, la terapia con plasma convaleciente podría ser muy útil para toda la población, principalmente para aquellas personas de mayor edad o con factores de riesgo para desarrollar complicaciones de la COVID-19.

Es muy importante para poder demostrar la eficacia del tratamiento, la participación de personas con COVID-19 en el estudio y la colaboración de personas que han pasado la COVID-19 como donantes de plasma. ¡Os animamos a todos!

¡PARTICIPA EN EL ESTUDIO!

#### **4. ¿QUIÉNES SOMOS?**





Desde el Hospital Universitari Germans Trias i Pujol de Badalona (Barcelona), la Fundació Lucha contra el Sida y el Instituto de Investigación del Sida IrsiCaixa se trabaja de forma incansable para luchar contra la pandemia a corto y largo plazo.

El estudio COnV-ert está liderado por el Dr. Oriol Mitjà y el Dr. Bonaventura Clotet, con el objetivo de disminuir los síntomas de COVID-19 y la severidad de la enfermedad.

#### **Dr. Oriol Mitjà (Barcelona, 1980)**

Es un médico investigador especializado en medicina interna y enfermedades infecciosas, y experto en la erradicación de enfermedades tropicales. A partir de 2010 desarrolló desde el centro médico de Lihir en Papúa Nueva Guinea, un tratamiento efectivo contra el pian basado en la azitromicina.

Se licenció en medicina en la Universidad de Barcelona en 2004, y realizó su residencia hasta el 2010 en la especialidad de medicina interna en Barcelona. En 2009 obtuvo una beca Bada de cooperación internacional otorgada por el Colegio Oficial de Médicos de Barcelona que le permitió realizar estudios de diplomatura de Higiene y Medicina Tropical en la London School of Hygiene & Tropical Medicine, en Londres, y en 2012 terminó su doctorado en Barcelona con la tesis “Estrategias para el control del pian y otras enfermedades tropicales desatendidas de las islas del Pacífico sur”, a partir de sus trabajos in situ en la isla de Lihir, en Papúa Nueva Guinea.

#### **Dr. Bonaventura Clotet (Barcelona, 1953)**

Se doctoró en Medicina por la Universidad Autónoma de Barcelona en 1981. Actualmente es, entre otros cargos, jefe de la unidad de VIH y director del Laboratorio de Retrovirología de la Fundació IrsiCaixa en el Hospital Universitari Germans Trias i Pujol de Badalona. También es presidente de la Fundació “Lucha contra el Sida”, co-director del proyecto HIVACAT para el desarrollo de la vacuna AIDS en España y profesor asociado en la Facultad de Medicina de la Universidad Autónoma de Barcelona. En el campo internacional, forma parte del comité EuroSIDA, y participa, asimismo, en la comisión organizativa y científica de varios talleres sobre la resistencia a la droga y en múltiples conferencias AIDS. Ha publicado más de quinientos artículos en periódicos y revistas internacionales y es miembro de diferentes editoriales científicas como HIV Medicine y Experto en Review of Clinical Immunology. Ha sido galardonado por el Catalan Health Institute y ha recibido la Medalla Josep Trueta al Mérito Sanitario, entre otros premios.

#### **5. ¡PARTICIPA!**



Si cumples estos tres criterios, puedes ser apto para el estudio. ¡Participa! ¡Ayúdanos!

1. **Positivo en COVID-19:** Si hace menos de 3 días que te han hecho el test PCR de COVID-19 y has dado positivo.
2. **Edad  $\geq$  50 años:** Si tienes 50 años o más.
3. **Sintomático:** Si tienes síntomas de COVID-19 que no requieren hospitalización, desde hace 5 días o menos.

Si quieres participar, te explicamos cómo hacerlo en 5 sencillos pasos:

1. Participa en el estudio: Rellena el formulario (\*).
2. Si cumples con los requisitos, un equipo médico se pondrá en contacto contigo por teléfono, te explicará el estudio y revisarán si cumples las condiciones médicas para participar en tu historia clínica, previa autorización (*visita de cribaje*).
3. En un máximo de 3 días se te realizará una visita hospitalaria, donde se te darán todos los detalles y explicaciones sobre el estudio que desees. La participación es voluntaria y deberás firmar el consentimiento informado para participar en el estudio. Se te realizarán una serie de pruebas, y se te administrará una infusión endovenosa de plasma convaleciente o placebo.
4. Se te hará el seguimiento oportuno mencionado previamente hasta 60 días después de recibir el tratamiento. Te podrás poner en contacto con el equipo investigador en cualquier momento si tienes dudas, así como finalizar tu participación si lo desees.
5. Finaliza el estudio.



## **\* FORMULARIO (Google docs)**

¡Muchas gracias por tu participación!

A continuación te realizaremos una serie de preguntas para valorar mejor si puedes ser un candidato a participar en el estudio.

- ¿Tienes una prueba PCR positiva para SARS-CoV-2 (de COVID-19) realizada en los últimos 3 días? NO / SÍ (*si es que SÍ, se abrirá la siguiente pregunta*)
- ¿Tienes 50 años o más? NO / SÍ (*si es que SÍ, se abrirá la siguiente pregunta*)
- ¿Estás hospitalizado? NO / SÍ (*si es que NO, se abrirá la siguiente pregunta*)
- ¿Tienes algún síntoma compatible con COVID-19? NO / SÍ (*si es que SÍ, se abrirá la siguiente pregunta*)
- ¿Estás embarazada o planeas un embarazo en las próximas semanas/meses? NO / SÍ (*si es que NO, se abrirá la siguiente pregunta*)
- ¿Vives en *Barcelona Ciudad* o en las zonas *Metropolitana Nord* o *Metropolitana Sud*? NO / SÍ (*si es que SÍ, se abrirá la explicación final*)

### A. NO CUMPLES LAS CARACTERÍSTICAS

*\*Si en algún momento la respuesta no es la adecuada para seguir a la próxima pregunta, se abrirá el siguiente mensaje:*

No cumples los criterios necesarios para poder participar en el estudio COnV-ert. Pero te agradecemos tu interés y participación.

Esperamos que te mejores pronto.

### B. EXPLICACIÓN FINAL

Si has llegado hasta aquí es que eres un posible candidato para participar en el estudio COnV-ert.

Para poder informarte mejor de los procedimientos del estudio y valorar mejor tu inclusión, deberíamos poder hacerte una primera visita telefónica. Con esta finalidad, necesitamos que registres tu nombre y apellidos, DNI y nos facilites tu número de teléfono.

Además, necesitamos que nos autorices para poder revisar conjuntamente contigo por teléfono tu historial médico con el objetivo de evaluar mejor si tienes algún factor de riesgo en caso de administrarte el plasma convaleciente y, en ese caso, no serías incluido en el estudio.

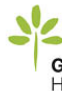

**DATOS PERSONALES DEL PARTICIPANTE:**

Nombre\*:

Primer Apellido\*:

Segundo Apellido:

Fecha de nacimiento\*:

Sexo\*: Hombre / Mujer

Tipo de documento: DNI / NIE / Pasaporte

- DNI/NIE/Pasaporte:

Dirección\*:

Código postal\*:

Población\*:

CIP\* (Código de Identificación Personal en el Sistema de Información de Tarjeta Sanitaria):

Teléfono de contacto\*:

Correo electrónico\*:

Allegado del candidato\*: Familiar (especificar) / Amigo cercano

Nombre del allegado del candidato\*:

Teléfono del allegado del candidato\*:

**Acepto la política de protección de datos\*:** *(casilla para indicar que Sí)*

**Acepto la revisión de mi historial médico\*:** *(casilla para indicar que Sí)*

Fundación Lucha contra el Sida, como responsable del tratamiento, le informa que tratará sus datos con la finalidad de evaluar su idoneidad y la gestión para la participación en el estudio COnV-ert, promovido por la Fundación Lucha contra el Sida y el Hospital Germans Trias i Pujol.



La base legal para el tratamiento de sus datos es de su consentimiento otorgado al aceptar la presente política de protección de datos.

Puede ejercer sus derechos de acceso, rectificación, supresión, oposición y limitación, portabilidad, a no estar sometido a decisiones individuales automatizadas y de revocación. Para eso debería enviar un correo electrónico a la dirección [estudicovid19@flsida.org](mailto:estudicovid19@flsida.org)

Tiene disponible información adicional sobre el tratamiento de sus datos y cómo ejercer sus derechos en la página: *(link a la parte de la web donde se explica) (explicación más abajo en Política de Privacidad)*

Aceptando la revisión del historial médico, autoriza a la revisión de su historial médico por parte del equipo investigador del estudio COnV-ert, a través de los programas de historia clínica informatizados correspondientes mediante su Código de Identificación Personal en el Sistema de Información de Tarjeta Sanitaria (CIP). La finalidad del acceso es únicamente de gestión del estudio COnV-ert, con tal de evaluar los criterios de inclusión y exclusión de dicho estudio, y de obtener datos fiables de seguridad del tratamiento.

*\*Campo obligatorio.*



## **AVISO LEGAL Y POLÍTICA DE PRIVACIDAD**

### **Política de privacidad - Web**

Tanto la privacidad de los datos como la confidencialidad de la información son aspectos importantes para la Fundación Lucha contra el Sida (Fundación FLS). Esta política de protección de datos establece la manera en que serán tratados los datos de carácter personal obtenidos a través de la presente página web y podrá variar con el tiempo a causa de posibles cambios legislativos, jurisprudenciales o de criterios seguidos por la Agencia Española de Protección de Datos y/o autoridades competentes en cada momento. Es por eso que la Fundación Lucha contra el Sida se reserva el derecho a modificar la presente política para adaptarla a novedades legislativas o jurisprudenciales que se encuentren vigentes en el momento preciso en el que se acceda a la web.

### **Información relativa al tratamiento de datos personales:**

#### **Responsable del tratamiento:**

Fundación FLS de Lucha contra el Sida, las Enfermedades Infecciosas y la Promoción de la Salud y la Ciencia (de ahora en adelante Fundación FLS), con domicilio social en Ctra de Canyet s/n Hospital Universitario Germans Trias i Pujol, 2a planta Maternal, 08916 Badalona (Barcelona, España).

El responsable del tratamiento ha designado un delegado de Protección de Datos con quien puede contactar mediante el correo [lopd@flsida.org](mailto:lopd@flsida.org).

#### **Finalidad del tratamiento, base legal y período de conservación de los datos:**

Los datos serán tratados para la gestión del estudio CONV-ert. Para la gestión del estudio es necesario que nos autorice a acceder a su Historia Clínica Compartida y el destinatario de los datos será el equipo investigador del estudio, liderado por el Dr. Oriol Mitjà.

Los comités éticos, los representantes de la Autoridad Sanitaria en materia de inspección y el personal autorizado por el promotor, únicamente podrán acceder para comprobar los datos personales, los procedimientos del estudio clínico y el cumplimiento de las normas de buena práctica clínica (siempre manteniendo la confidencialidad de la información).

La base legal para el tratamiento de los datos es el consentimiento del interesado, que manifiesta en base a un acto afirmativo consistente en el envío de sus datos por medio de los canales indicados o el marcaje de las casillas cuando así corresponda. La participación en el



estudio CONV-ert se realizará previa manifestación de consentimiento específico por parte del interesado.

Sus datos se conservarán durante 5 años, en cumplimiento con las leyes en vigor.

#### Derechos:

Cualquier persona tiene el derecho de obtener información sobre qué datos se están tratando.

Tiene derecho a acceder, rectificar, suprimir, oponerse a que sus datos se traten, a limitar el tratamiento, a pedir la portabilidad de los datos, a no ser sometido a decisiones individuales automatizadas y a revocar el consentimiento que otorga.

Para ejercer los derechos mencionados puede enviar un correo electrónico con su petición, adjuntando un documento nacional de identidad o documento equivalente a [estudicovid19@flsida.org](mailto:estudicovid19@flsida.org)

**Derecho de reclamación:** El organismo competente para conocer de la correcta aplicación de las normas sobre tratamiento de la información es la Autoridad Española de Protección de Datos, con domicilio en la Calle Jorge Juan n. 6 de Madrid.

**Elaboración de perfiles:** Para el cumplimiento de los objetivos del responsable del tratamiento y, sobre todo, para hacer una atención más personalizada, cuidadosa y eficaz del usuario, a veces, es necesario elaborar perfiles de los destinatarios de los servicios. En ningún caso, la elaboración del perfil se hace de manera exclusivamente automatizada.

Más información sobre la manera que tratamos los datos: <https://www.flsida.org/es/aviso-legal>

#### Seguridad en el tratamiento:

Teniendo en cuenta el estado de la técnica, los costes de aplicación, y la naturaleza, el alcance, el contexto y los fines del tratamiento, así como los riesgos de probabilidad y gravedad variables para los derechos y libertades de las personas físicas, la Fundación FLS aplicará medidas técnicas y organizativas apropiadas para garantizar un nivel de seguridad adecuado al riesgo, que eviten la destrucción, pérdida o alteración accidental o ilícita de datos personales transmitidos, conservados o tratados de otra manera, o la comunicación o acceso no autorizados a los datos mencionados.



FUNDACIÓ **LLUITA** CONTRA LA SIDA  
I LES MALALTIES INFECCIOSES



**Germans Trias i Pujol**  
Hospital

*CONTENIDO WEB*

*COV-ert, versió 2.0, de 14 de octubre de 2020*

---





EMAIL

AUTOMÁTICO:

*Este email debería enviarse una vez el potencial participante se ha inscrito vía web y ha 1) contestado a las opciones correctas para poder ser incluido (SÍ o NO, dependiendo de la pregunta); 2) ha rellenado sus datos personales (incluida la dirección de correo electrónico); y 3) ha clicado que SÍ que permite que accedamos a su historia clínica y acepta la política de datos.*

*Apreciado/a .....,*

*Gracias por inscribirse en la web de Fundación Lucha contra el Sida (FLS) para ser valorado como posible participante en el Estudio COnV-ert.*

*Fundación Lucha contra el Sida, le informa que tratará sus datos con la finalidad de evaluar su idoneidad y la gestión para la participación en el estudio COnV-ert, promovido por la Fundación Lucha contra el Sida y el Hospital Germans Trias i Pujol.*

*La base legal para el tratamiento de sus datos es de su consentimiento otorgado al aceptar la presente política de protección de datos. Puede ejercer sus derechos de acceso, rectificación, supresión, oposición y limitación. Para eso debería enviar un correo electrónico a la dirección [estudicovid19@flsida.org](mailto:estudicovid19@flsida.org)*

*Tiene disponible información adicional sobre el tratamiento de sus datos y cómo ejercer sus derechos en la página: ([link a la parte de la web donde se explica](#))*

*Usted ha aceptado la revisión del historial médico, y autoriza a la revisión de su historial médico por parte del equipo investigador del estudio COnV-ert a través de los programas de historia clínica informatizados correspondientes mediante su Código de Identificación Personal en el Sistema de Información de Tarjeta Sanitaria (CIP). La finalidad del acceso es únicamente de gestión del estudio COnV-ert, con tal de evaluar los criterios de inclusión y exclusión de dicho estudio, y de obtener datos fiables de seguridad del tratamiento. El equipo investigador se pondrá en contacto con usted por teléfono para revisar conjuntamente estos criterios e informarle de su idoneidad para entrar en el estudio COnV-ert.*

*Atentamente,*



#### *CANALES DE DIFUSIÓ DE LA WEB:*

*La web del estudio podrá ser promovida a través de:*

- *Medios de comunicació*
- *Redes sociales: Twitter de FLSida y de la cuenta personal de Oriol Mitjà; Instagram de FLSida y Facebook de FLSida*
- *Médicos habituales: Centros de Urgencias hospitalarias, Centros de Urgencias de Atención Primaria (CUAPs), Centros de Asistencia Primaria (CAP)...*

#### *RESUMEN PARA ANUNCIAR EL ESTUDIO EN LAS REDES SOCIALES:*

*Empezamos el estudio #COnVert para evaluar si el #Plasma\_convaleciente es eficaz y seguro para el tratamiento de la #Covid19 en personas con síntomas leves o moderados. ¡Ayúdanos!*

- *Si tienes  $\geq 50$  años;*
- *hace menos de 3 días que te han hecho el test PCR de COVID-19 y has dado positivo;*
- *tienes síntomas de COVID-19 que no requieren hospitalización desde hace 5 días o menos;*
- *y vives en las áreas sanitarias de Barcelona, Metropolitana Sud o Metropolitana Nord*

*¡Participa en el estudio! Infórmate en la web .....*

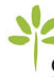

## CAPTURAS DE PANTALLA:

Añadimos capturas de pantalla de una versión preliminar de la web (no publicada) que se ha diseñado con el texto incluido en el anexo del contenido web de la primera versión del protocolo. Esta versión no incluye los cambios realizados en la nueva versión del texto que se está presentando. Tampoco contiene los formularios web ni la información relacionada con la política de protección de datos.

Se presentan estas capturas como modelo para facilitar la comprensión del material web.

### 1. INICIO

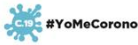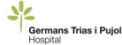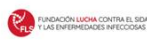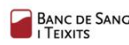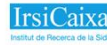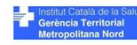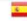

[Inicio](#) | [¿Por qué colaborar?](#) | [Estudio COV-ert](#) | [¿Quiénes somos?](#) | [¡PARTICIPA!](#)

**Si cumples estos tres criterios puedes ser apto para el estudio, ¡Participa! ¡Ayúdanos!**

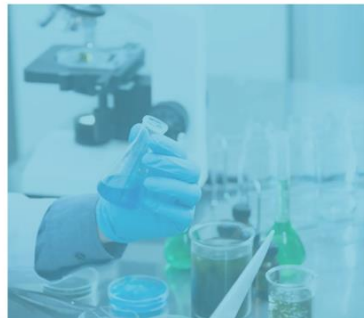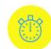

#### 1. Positivo en COVID-19

Si hace menos de 3 días que te han hecho el test PCR de COVID-19 y has dado positivo.

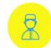

#### 2. Edad $\geq$ 50 años

Si tienes 50 años o más.

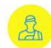

#### 3. Sintomático

Si tienes síntomas de COVID-19 que no requieren hospitalización, desde hace 5 días o menos.

Las hipótesis del estudio son que el tratamiento con plasma convaleciente complementaria y estimularía el sistema inmunitario de los enfermos con COVID-19, podría frenar la progresión de la enfermedad así como reducir la severidad y duración de sus síntomas.

La terapia con plasma se ha usado para tratar muchas otras afecciones y es segura.

La terapia con plasma convaleciente podría ser muy útil para toda la población, principalmente para aquellas personas de mayor edad o con factores de riesgo para desarrollar complicaciones de la COVID-19.

La participación de personas con COVID-19 en el estudio y la colaboración de personas que han pasado la COVID-19 como donantes de plasma es muy importante para poder demostrar la eficacia del tratamiento y que, si funciona, pueda aplicarse a la población general. ¡Os animamos a todos a participar!

El estudio se realiza en coordinación con el Hospital Germans Trias i Pujol, el Banco de Sangre y Tejidos de Catalunya y Grifols, con la colaboración de Atención Primaria de la región Metropolitana Nord. El estudio se abrirá a otros centros hospitalarios de Cataluña durante las próximas semanas. EL estudio ha sido aprobado por el comité ético de investigación del Hospital Universitario Germans Trias i Pujol.

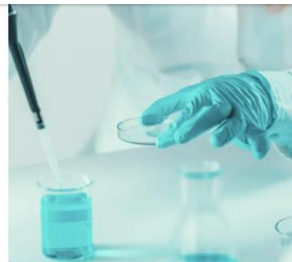

*"La terapia con plasma convaleciente podría ser muy útil para toda la población, principalmente para aquellas personas de mayor edad o con factores de riesgo para desarrollar complicaciones de la COVID-19."*



Si cumples los tres criterios o no estás seguro de cumplir los tres, o aún tienes dudas, llámanos:

**900 431 403**

\* Horario de atención telefónica de lunes a viernes de 9 a 17h

## Resumen ESTUDIO COnV-ert

Estudio liderado por el Dr. Oriol Mitjà y el Dr. Bonaventura Clotet, con el objetivo de frenar la progresión de la COVID-19.

La emergencia COVID-19 exige el desarrollo urgente de nuevas estrategias para proteger a la población, principalmente a aquellas personas con mayor riesgo.

El estudio pretende evaluar la eficacia y la seguridad del tratamiento con plasma convaleciente en personas mayores de 50 años con enfermedad COVID-19 leve o moderada no hospitalizadas. El propósito de este estudio es ver si el tratamiento con plasma convaleciente puede funcionar como tratamiento precoz de la COVID-19 leve y moderada y frenar su progresión, así como disminuir la severidad y duración de sus síntomas.

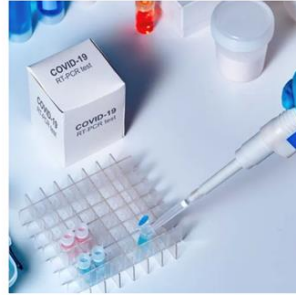

## 2. ¿POR QUÉ COLABORAR?

[Inicio](#) | [¿Por qué colaborar?](#) | [Estudio COnV-ert](#) | [¿Quiénes somos?](#) | [¡PARTICIPA!](#)

**Ayúdanos, ¡Te necesitamos!**

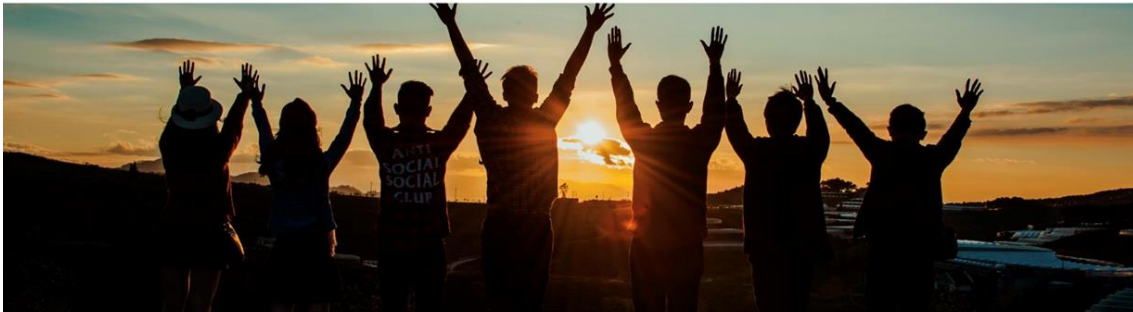

**¡STOP CORONAVIRUS!**

**¡Entre todos podemos pararlo!**



#### Reto compartido

Tenemos que conseguir más de 400 personas con la COVID-19 para realizar el estudio. Esto significa encontrar personas interesadas en este estudio y su finalidad, hacer las pruebas PCR para COVID-19 a todos los participantes, juntamente con una extracción sanguínea, administrar el plasma convaleciente o el placebo a cada uno y hacerles el seguimiento, haciendo una segunda prueba PCR el día 7, junto con una nueva extracción sanguínea. Logística y organizativamente es un reto importante.

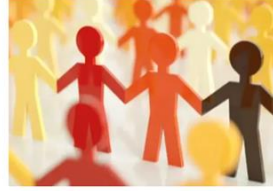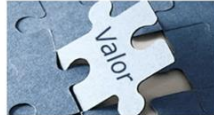

#### Valor

Si el estudio da los resultados esperados, tendremos una herramienta efectiva para frenar el virus. En unas semanas o meses se podría aplicar a todas las personas enfermas con características similares a las estudiadas.

#### Tipo de tratamiento y seguimiento médico

El tratamiento que se utiliza en el estudio es el plasma convaleciente. Es un tratamiento que se ha utilizado para otras afecciones y es seguro. Durante su transfusión, un equipo sanitario estará presente en todo momento para valorar posibles efectos adversos.

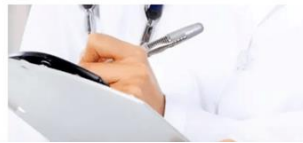

### 3. ESTUDIO ConV-ert

#### Estudio médico

La enfermedad del coronavirus 2019 (COVID-19) es una infección respiratoria causada por el virus SARS-CoV-2. La propagación descontrolada del coronavirus SARS-CoV-2 ha generado una emergencia sanitaria sin precedentes, sólo comparable a las pandemias de influenza de 1918 y 1957.

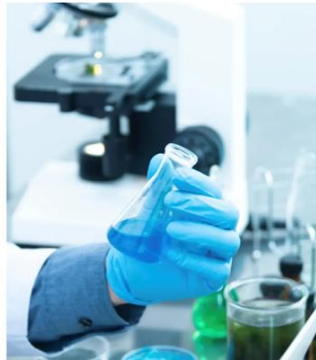

Por el momento, no hay tratamientos efectivos para la COVID-19, por lo que se necesitan datos definitivos de estudios clínicos para encontrar tratamientos seguros y efectivos contra esta enfermedad. El desarrollo de vacunas avanza a un ritmo rápido, pero se estima que aún faltan por lo menos 6 meses hasta su disponibilidad generalizada. La emergencia COVID-19 exige el desarrollo urgente de nuevas estrategias para proteger a la población, principalmente a aquellas personas con mayor riesgo.

La terapia con plasma convaleciente se ha usado para tratar a pacientes con diferentes infecciones, utilizando plasma extraído de individuos recientemente recuperados para transferir inmunidad de anticuerpos pasivos a los que han sido infectados recientemente.

El uso de plasma convaleciente se ha estudiado en brotes de otras infecciones respiratorias, incluidas la epidemia de SARS-

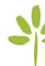

**Nuestra hipótesis principal es que la administración precoz de plasma convaleciente en personas mayores de 50 años con enfermedad COVID-19 leve o moderada puede frenar la progresión de la enfermedad y disminuir la severidad de sus síntomas.**

La Fundación Lucha contra el Sida y las Enfermedades Infecciosas, junto con Banc de Sang i Teixits, Irsi-Caixa y el Hospital Germans Trias i Pujol, han lanzado un estudio clínico dirigido a identificar un tratamiento eficaz y seguro para reducir la severidad de la COVID-19 y disminuir la severidad de sus síntomas. La intervención es en pacientes afectados por COVID-19 leve o moderada, no hospitalizados, a quienes se les administrará una infusión endovenosa de plasma convaleciente o placebo, con el objetivo de reducir la carga viral (la cantidad de virus en las secreciones respiratorias), reducir el ratio de hospitalizaciones después de 28 días de la administración y reducir la severidad y la duración de los síntomas de COVID-19.

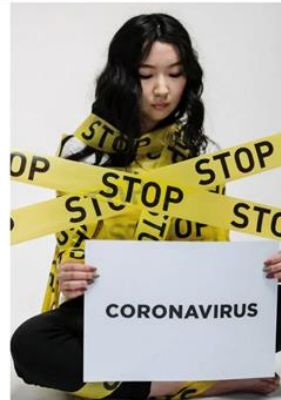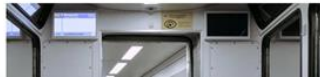

En este estudio está prevista la participación de entre 450 y 500 personas diagnosticadas con infección por SARS-CoV-2 que se encuentren con enfermedad COVID-19 leve o moderada que no precise hospitalización, del área

hospitalaria tendrá una duración de aproximadamente 2 horas. Después de la administración, todos los pacientes serán seguidos hasta el día 60. Durante los primeros 14 días, los participantes se tomarán diariamente la temperatura en casa y completarán un cuestionario electrónico de síntomas diario. El equipo investigador, mediante una llamada telefónica el día 3, realizará un seguimiento telefónico. El día 7 serán visitados en domicilio por personal sanitario que tomará una muestra nasofaríngea y una muestra de sangre. Los días 14, 28 y 60 se realizará un seguimiento telefónico.

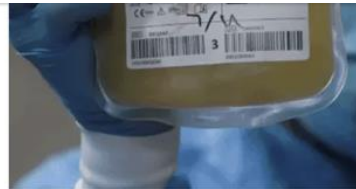

El estudio se realiza en coordinación con el Hospital Germans Trias i Pujol, el Banco de Sangre y Tejidos de Catalunya y Grifols. El estudio ha sido aprobado por el comité ético de investigación del Hospital Universitario Germans Trias i Pujol. El protocolo del estudio ha sido incluido en un registro público, y puede ser consultado [aquí](#).

Si se verifica la validez del tratamiento, la terapia con plasma convaleciente podría ser muy útil para toda la población, principalmente para aquellas personas de mayor edad o con factores de riesgo para desarrollar complicaciones de la COVID-19. Es muy importante para poder demostrar la eficacia del tratamiento, la participación de personas con COVID-19 en el estudio y la colaboración de personas que han pasado la COVID-19 como donantes de plasma. ¡Os animamos a todos! Nuevo párrafo

Con la colaboración de:

**GRIFOLS**

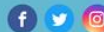

#### **4. ¿QUIÉNES SOMOS?**

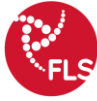

## ¿Quiénes somos?

Desde el Hospital Universitari Germans Trias i Pujol de Badalona (Barcelona), la Fundació Lluita contra el Sida y el Instituto de Investigación del Sida IrsiCaixa se trabaja de forma incansable para luchar contra la pandemia a corto y largo plazo.

El estudio ConV-ert está liderado por el Dr. Oriol Mitjà y el Dr. Bonaventura Clotet, con el objetivo de disminuir los síntomas de COVID-19 y la severidad de la enfermedad.

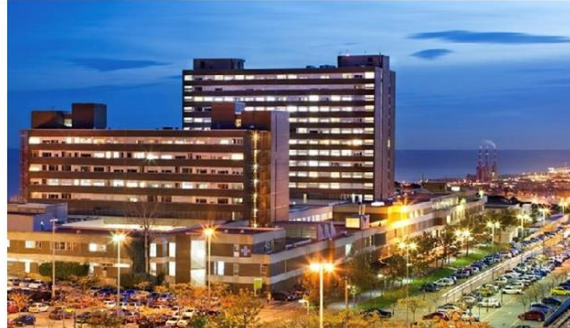

**Dr. Oriol Mitjà**  
(Barcelona, 1980)

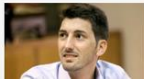

**Dr. Bonaventura Clotet**  
(Barcelona, 1953)

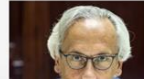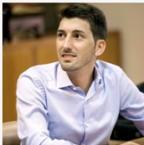

Es un médico investigador especializado en medicina interna y enfermedades infecciosas, y experto en la erradicación de enfermedades tropicales. A partir de 2010 desarrolló desde el centro médico de Lihir en Papúa Nueva Guinea, un tratamiento efectivo contra el pian basado en la azitromicina.

Se licenció en medicina en la Universidad de Barcelona en 2004, y realizó su residencia hasta el 2020 en la especialidad de medicina interna en Barcelona. En 2009 obtuvo una beca Bada de cooperación internacional otorgada por el Colegio Oficial de Médicos de Barcelona que le permitió realizar estudios de diplomatura de Higiene y Medicina Tropical en la London School of Hygiene & Tropical Medicine, en Londres, y en 2012 terminó su doctorado en Barcelona con la tesis "Estrategias para el control del pian y otras enfermedades tropicales desatendidas de las islas del Pacífico sur", a partir de sus trabajos in situ en la isla de Lihir, en Papúa Nueva Guinea.

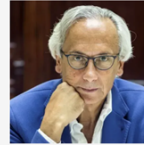

Se doctoró en Medicina por la Universidad Autónoma de Barcelona en 1981. Actualmente es, entre otros cargos, jefe de la unidad de VIH y director del Laboratorio de Retrovirología de la Fundació IrsiCaixa en el Hospital Universitari Germans Trias i Pujol de Badalona. También es presidente de la Fundació "Lluita contra el Sida", co-director del proyecto HIVACAT para el desarrollo de la vacuna AIDS en España y profesor asociado en la Facultad de Medicina de la Universidad Autónoma de Barcelona. En el campo internacional, forma parte del comité EuroSIDA, y participa, asimismo, en la comisión organizativa y científica de varios talleres sobre la resistencia a la droga y en múltiples conferencias AIDS. Ha publicado más de quinientos artículos en periódicos y revistas internacionales y es miembro de diferentes editoriales científicas como HIV Medicine y Experto en Review of Clinical Immunology. Ha sido galardonado por el Catalán Health Institute y ha recibido la Medalla Josep Trueta al Mérito Sanitario, entre otros premios.



## 5. ¡PARTICIPA!

Si cumples estos tres criterios, puedes ser apto para el estudio.  
**¡Participa! ¡Ayúdanos!**

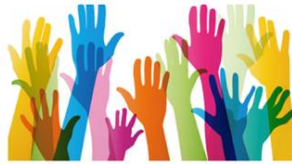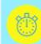

### 1. Positivo en COVID-19

Si hace menos de 3 días que te han hecho el test PCR de COVID-19 y has dado positivo.

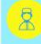

### 2. Edad $\geq$ 50 años

Si tienes 50 años o más.

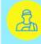

### 3. Sintomático

Si tienes síntomas de COVID-19 que no requieren hospitalización, desde hace 5 días o menos.

Si quieres participar, te explicamos cómo hacerlo en:

## ¡5 sencillos pasos!

Si quieres participar, te explicamos cómo hacerlo en:

## ¡5 sencillos pasos!

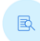

### 1. Participa en el estudio

Rellena el [formulario](#)

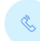

### 2. Si cumples con los requisitos...

Un equipo médico se pondrá en contacto contigo por teléfono, te explicará el estudio y revisarán si cumples las condiciones médicas para participar en tu historia clínica, previa autorización (visita de cribaje).

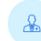

### 3. En un máximo de 3 días se te realizará una visita hospitalaria

Donde se te darán todos los detalles y explicaciones sobre el estudio que desees. La participación es voluntaria y deberás firmar el consentimiento informado para participar en el estudio.

Se te realizarán una serie de pruebas, y se te administrará una infusión endovenosa de plasma convaleciente o placebo.

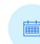

### 4. Se te hará el seguimiento oportuno

Se te hará el seguimiento oportuno mencionado previamente hasta 60 días después de recibir el tratamiento. Te podrás poner en contacto con el equipo investigador en cualquier momento si tienes dudas, así como finalizar tu participación si lo deseas.

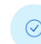

### 5. Finaliza el estudio

¡Gracias por haber participado!



**Annex 7: Composition, responsibilities and flow chart for DSMB**

## Data and Safety Monitoring Board (DSMB) Charter

|                                   |                                                                                                                                                                            |
|-----------------------------------|----------------------------------------------------------------------------------------------------------------------------------------------------------------------------|
| <b>PROTOCOL TITLE:</b>            | Convalescent Methylene Blue Treated (MBT) Plasma for Early Treatment in Non-hospitalised Mild or Moderate COVID-19 Patients: a Randomized Double Blind Study (COnV-ert).   |
| <b>PROTOCOL VERSION:</b>          | 2.0, 14 <sup>th</sup> October 2020                                                                                                                                         |
| <b>SPONSOR:</b>                   | Fundació FLS de Lluita contra la Sida, les Malalties Infeccioses i la Promoció de la Salut i La Ciència<br><br>Hospital Germans Trias i Pujol, Institut Català de la Salut |
| <b>COORDINATING INVESTIGATOR:</b> | Oriol Mitjà, Hospital Universitari Germans Trias i Pujol                                                                                                                   |
| <b>DSMB CHARTER VERSION:</b>      | <i>2.0_14Oct2020</i>                                                                                                                                                       |
| <b>APPROVED:</b>                  | <i>(date of the operational meeting)</i>                                                                                                                                   |

### CONFIDENTIAL

This document contains confidential information. Nothing herein is to be disclosed without written consent from the Study PI.

Note: This Charter will serve as the Standard Operating Procedure (SOP) for the DSMB.

## Table of Contents

|     |                                                      |    |
|-----|------------------------------------------------------|----|
| 1   | INTRODUCTION                                         | 3  |
| 2   | COMPOSITION OF THE DSMB                              | 3  |
| 3   | INDEPENDENCE OF THE DSMB                             | 3  |
| 4   | RESPONSIBILITIES OF THE DSMB                         | 4  |
| 4.1 | Objectives                                           | 4  |
| 4.2 | General Responsibilities                             | 4  |
| 5   | DSMB CHAIR RESPONSIBILITIES                          | 5  |
| 6   | MEETINGS OF THE DSMB                                 | 5  |
| 6.1 | Conduct of the Meetings                              | 5  |
| 6.2 | Organizational Meeting                               | 5  |
| 6.3 | Scheduled Protocol and Data Review Meetings          | 6  |
| 6.4 | Documentation                                        | 7  |
| 6.5 | Unscheduled Meetings/Reports                         | 7  |
| 7   | COMMUNICATION                                        | 7  |
| 7.1 | Call of DSMB Meetings                                | 7  |
| 7.2 | DSMB Minutes                                         | 7  |
| 7.3 | Recommendations                                      | 8  |
| 8   | REVISIONS TO THE CHARTER                             | 8  |
| 9   | COMPLETION OF DSMB ACTIVITIES                        | 8  |
| 10  | DOCUMENT RETENTION                                   | 8  |
| 11  | REFERENCES                                           | 9  |
| ●   | APPENDIX A: DSMB CONFLICT OF INTEREST REPORTING FORM | 10 |
| ●   | APPENDIX B: DSMB MEMBER CHARTER SIGNATURE PAGE       | 12 |

## 1 INTRODUCTION

An independent Data and Safety Monitoring Board (DSMB) has been convened to assess the progress of this clinical study, the safety data, and critical efficacy endpoints and provide recommendations to the Coordinating Investigator and the Sponsor regarding the study continuation, modification, or termination. The members of the DSMB serve in an individual capacity and provide their expertise and recommendations. The DSMB will review cumulative study data to evaluate safety, efficacy, study conduct, and scientific validity and data integrity of the study.

This Charter will outline the roles and responsibilities and serve as the Standard Operating Procedure (SOP) for the DSMB.

## 2 COMPOSITION OF THE DSMB

The Board will be composed of 5 members (inclusive of the DSMB Chair). The DSMB includes experts in the field of clinical trials, haematology and infectious diseases:

- *Cinta Hierro – Catalan Institute of Oncology (ICO)-Badalona – CHAIR.*
- *David Boulware – University of Minnesota.*
- *Robin Mogg – Bill and Melinda Gates Medical Research Institute.*
- *Binh Ngo – University of Southern California.*
- *Natalia Tovar – Hospital Clínic de Barcelona.*

Quorum – A quorum will occur when at least 4 out of the 5 members are present.

## 3 INDEPENDENCE OF THE DSMB

It is essential that the judgment of members of the DSMB not be influenced by factors other than those necessary to maintain subject safety and to preserve the integrity of the study. Persons who have an apparent financial, intellectual, or other interests with the study intervention should not be DSMB participants for the evaluation of that product. Independence is essential to ensure that DSMB members are objective and capable of an unbiased assessment of the study's safety and efficacy data. The following will ensure the independence of the DSMB:

- DSMB members will not be supervised by any study investigator of a protocol currently under review by this DSMB, or participate as investigators in any study currently under review by this DSMB.
- Members of the DSMB must not have a direct interest in knowing or influencing study outcomes or have a financial or intellectual interest in the outcome of any studies under review. They will be expected to complete a Conflict of Interest Reporting Form (**Appendix A**).

## 4 RESPONSIBILITIES OF THE DSMB

As this DSMB is constituted for a single study protocol, DSMB members should only agree to serve if they are generally supportive of the study's overall aims and general design. This is because the study has already been through a scientific review. The DSMB will have the opportunity to review and suggest changes in the study protocol during the interim analysis. The DSMB will consider study-specific data as well as current relevant background knowledge about the disease, investigational product, or patient population under study.

### 4.1 Objectives

The primary objective of the DSMB is to monitor the safety and efficacy of the intervention and make recommendations to the Coordinating Investigator and the Sponsor according to interruption criteria.

The DSMB will revise safety and efficacy data of the study to advise on the development of the study.

Activities of the DSMB:

- Revision of interim report for sample size recalculation, and any other interim report.
- Revision of Serious Adverse Events (SAEs).
- Revision of deaths.
- Revision of protocol deviations.
- Revision of early withdrawals.
- Assessment of early interruption of the study.

### 4.2 General Responsibilities

The general responsibilities of the DSMB are:

- To evaluate, on an ongoing basis, the accumulating safety assessments to ensure the ongoing safety of study subjects. To that end, the DSMB will assess SAEs in the two foreseen DSMB meetings. The DSMB will also receive in a timely manner (within 24h of the investigator team becoming aware of it) all information related to fatal SAEs.
- To consider factors external to the study when relevant information becomes available, such as scientific or therapeutic developments that may have an impact on the safety of the participants or the ethics of the study.
- To review the conduct of the study, including protocol deviations.
- To review data on participant recruitment, accrual, and retention, as well as assessments of data quality, completeness, and timeliness. In particular, the DSMB will revise recruitment data and losses to follow-up.
- To protect the confidentiality of the study data and the DSMB discussions.

- To make recommendations to continue, modify, or terminate the study according to interruption criteria.

## **5 DSMB CHAIR RESPONSIBILITIES**

The following responsibilities are those of the DSMB Chair:

- Serves as a voting member.
- Facilitates the meetings, assists in the development of the agenda, and ensures that the meeting minutes and recommendation(s) are appropriately documented.
- Serves as the primary contact person for the DSMB.
- Reviews and approves the Charter.
- Discusses DSMB recommendations with the Coordinating Investigator and/or the Sponsor and appropriate members of the project team via email or teleconference.
- Takes and maintains minutes from closed sessions of DSMB teleconferences until study termination.

## **6 MEETINGS OF THE DSMB**

### **6.1 Conduct of the Meetings**

Meetings will be conducted in two sessions:

- open session, with the presence of the Coordinating Investigator or designate(s) to present data and documents and answer questions
- closed session accessible only to the DSMB members, to discuss data and documents presented and make recommendations.

### **6.2 Organizational Meeting**

This initial meeting should be attended by DSMB members and representatives of the Sponsor, members of the study staff, and the investigator(s) may also be invited. It affords the DSMB an opportunity to ask for clarifications and/or recommend modifications to the DSMB Charter and/or to the study protocol.

At the beginning of the DSMB meeting, the Chair will initiate the organizational session of the meeting, which will include calling the meeting to order and assuring a duly constituted Board.

Meeting objectives will include:

- the introduction of the DSMB

- review and discuss the DSMB Charter, defining the roles and responsibilities of the DSMB and developing procedures for conducting business (e.g., voting rules and quorum, attendance, etc.)
- review and discuss the study protocol, informed consent documents, and other relevant document(s).
- The DSMB should also consider prior ethics committee(s) reviews, as well as the requirements of applicable laws and regulations. The statistical methodology described in the protocol and its role in the DSMB safety monitoring plan should be clarified at this initial meeting. DSMB members should receive orientation regarding the procedures outlined in the charter, and training in relevant guidelines and SOPs. The DSMB may, in the context of this discussion, propose changes to the charter. The sponsor is responsible for final decisions relating to the charter.

Discussion of relevant issues will be in a closed session if deemed necessary by the DSMB members.

### 6.3 Scheduled Protocol and Data Review Meetings

- The foreseen meetings are:
  - DSMB interim report. Revision of the interim analysis of efficacy and safety variables including the first 60 participants reaching day 28, for the purpose of sample size recalculation.
  - After study primary completion, when inclusion has reached 474 participants (237 cases per arm) which have received the 28-day-follow-up visit.
  - The DSMB has the right to request additional data or extraordinary data review meetings should they think it is necessary to have a better understanding of the development of the trial.
- The participants' data to be reviewed during the meetings will be collected and distributed to the DSMB members in advance. First, the investigator or his/her designate will present the data and then the DSMB members will discuss them and request additional information if necessary.
- A quorum is considered sufficient if 4 people attend, but all documents provided by the DSMB need to be approved by the entire panel.
- Recommendations will be made to ensure and maintain the safety of the participants. Serious adverse events will be assessed, taking into account those defined for the disease under study, the known side effects of the intervention, and the risks or complications of the outcomes under evaluation.
- Consensus is required from the entire DSMB for premature interruption of the study.

- A report will be drafted summarizing the conclusions of the meeting and the recommendations of the DSMB. It will be distributed to the members of the DSMB for approval, and then given to the Coordinating Investigator, who will inform the Sponsor.

#### **6.4 Documentation**

The documents generated by the DSMB will be archived in the study Trial Master File.

#### **6.5 Unscheduled Meetings/Reports**

Unscheduled meetings can be requested by any party with the responsibility of overseeing the study. Requests can be made to the DSMB Chair, the Coordinating Investigator, or the Sponsor. The Chair, in collaboration with the Coordinating Investigator, will schedule any unplanned meetings.

The DSMB may request special reports on an as needed basis.

### **7 COMMUNICATION**

#### **7.1 Call of DSMB Meetings**

Meetings will be exclusively virtual meetings coordinated via Skype, GoToMeeting, or similar, and will be organized by one member of the study team.

Regular meetings will be called by the DSMB Chair at least 15 days before the date of the meeting, and the agenda and relevant documents will be circulated by the DSMB chair and one member of the study team at least 7 days before the meeting. Extraordinary meetings can be convened with shorter timeframes.

#### **7.2 DSMB Minutes**

The DSMB meetings may be audio recorded for the purpose of documenting meeting minutes. Once the Chair approves the minutes, the recordings will be destroyed.

The Coordinating Investigator or his/her designate will prepare the draft meeting minutes of the open session and forward to the DSMB Chair for review within one (1) week following the DSMB meeting. Minutes of the open session will describe the proceedings. Draft minutes will be distributed to the DSMB Chair for review and comment.

The minutes of the meetings and the reports will be shared with the Sponsor.



### 7.3 Recommendations

Following each meeting, a brief teleconference will be held between the DSMB Chair and the Coordinating Investigator to discuss the recommendations of the DSMB. This can occur immediately after the closed session, or any time after it.

The Chair will approve and forward to the Coordinating Investigator a summary that describes the DSMB recommendations, including minority opinions. The Coordinating Investigator will then review all recommendations. The DSMB can recommend to the Coordinating Investigator that the current study continue without modification, continue with specified modifications, halt or modify the study until more information is available, or simply halt the study altogether.

## 8 REVISIONS TO THE CHARTER

A draft of the Charter will be provided to the DSMB prior to the organizational meeting. During the organizational meeting, the Charter will be reviewed and revised as needed. The Chair, the Coordinating Investigator and the and Sponsor will approve all changes to the Charter. The version number and date will be displayed as a heading on all pages. The agreed upon Charter will need to be signed by all DSMB members (**appendix B**).

As needed, the Charter may be revised after the organizational meeting. Changes to the Charter will be clearly delineated in a document, and this document will be associated with the new version. Any new versions will need to be resigned by all DSMB members.

## 9 COMPLETION OF DSMB ACTIVITIES

The DSMB will remain active until written notification is received from the Coordinating Investigator.

## 10 DOCUMENT RETENTION

The DSMB members will maintain a copy of any relevant correspondence, meeting packets, DSMB reports, and meeting minutes in a secure area prior to the meeting occurrence.

## 11 REFERENCES

Department of Health, Education, and Welfare, Office of the Secretary, Protection of Human Subjects. Belmont Report: Ethical Principles and Guidelines for the Protection of Human Subjects of Research, Report of the National Committee for the Protection of Human Subjects of Biomedical and Behavioral Research. DHEW Publication No. (OS) 78-0013 and No. (OS) 78-0014. 18 April 1979.

Ellenberg, Susan S., Fleming, Thomas R., DeMets, David L. Data Monitoring Committees in Clinical Trials, A Practical Perspective. John Wiley and Sons, LTD, West Sussex, England, 2002.

The Greenberg Report (1988). Organization, review, and administration of cooperative studies: a report from the heart special project committee to the National Advisory Heart Council. *Controlled Clinical Trials* 9 (2): 137-148.

US Food and Drug Administration (2006) Guidance for Clinical Trial Sponsors on the Establishment and Operation of Clinical Trial Data Monitoring Committees. Rockville, MD: FDA. <http://www.fda.gov/RegulatoryInformation/Guidances/ucm127069.htm>.

UNICEF/UNDP/World Bank/WHO (31 March 2004). Operational Guidelines for the Establishment and Functioning of Data and Safety Monitoring Boards. Geneva, Switzerland.

National Institute of Health (May 1, 2001). Policy and Guidelines for Data and Safety Monitoring.

DAMOCLES Study Group (2005). A proposed charter for clinical trial data monitoring committees; helping them do their job well. *Lancet* 365:711-22.

● **APPENDIX A: DSMB CONFLICT OF INTEREST REPORTING FORM**

I have carefully reviewed the description of the clinical trials as described in the study protocol and have used the description to assess whether I have any real or perceived conflicts of interests that could affect my impartiality in serving on this DSMB. I acknowledge that real and perceived conflicts could arise if I have financial or professional relationships with individuals and organizations that:

- Are involved in designing or carrying out the study;
- Have products or services used or tested in the study; or,
- Have products, services, or other financial interests that would be directly and predictably affected by the outcome of the study, including
  - Competitors of the companies involved in carrying out the study, and
  - Companies that provide consulting or other business services related to the design, data analysis, or outcome of the study to those involved in conducting the study, to competitors, or to potential competitors.

**1. To the best of my knowledge and belief:**

I am currently not, nor in the past 12 months have I been a part-time, full-time, one-time, paid, or unpaid employee, consultant, scientific advisor, speaker, researcher, or contractor, of/to the organizations or individuals listed in the study protocol.

I am currently not, nor in the past 12 months have I been, a coauthor or other type of scientific collaborator with the organizations or individuals listed in the study protocol.

I am not negotiating future employment with any individuals or organizations listed in the study protocol nor do I have an arrangement for future service to these individuals and organizations.

I am currently not, nor in the past 12 months have I been an officer, director, trustee, or general partner of, nor am I otherwise similarly associated with the organizations listed in the study protocol.

I do not have any financial or equity interests in the organizations listed in the study protocol or any other financial or equity interest that would be affected by the conduct or outcome of the study.

I do not have any intellectual property interests in the study or the organizations listed in the study protocol.

I do not know of any other conflict of interest or apparent conflict of interest that might cause my objectivity as a member of the DSMB to be questioned.

**2. Please check the option below that reflects your status:**

- I certify to all the above statements and, thus, have NO exception to report.
- Exception, I hereby declare my conflicts of interest

| Organization or individual     | Activity |
|--------------------------------|----------|
| Fundació Lluita contra la SIDA |          |
| Banc de Sang i Teixits         |          |

|                    |  |
|--------------------|--|
| Oriol Mitjà        |  |
| Bonaventura Clotet |  |

**3. I am aware that I am responsible for identifying conflicts of interest and interests that may appear to be conflicts during the tenure of my membership, and:**

I will notify the Coordinating Investigator promptly if a change occurs in any of the above that may affect my objectivity. In such an event, I will abstain from participation in the Board until instructed otherwise by the Coordinating Investigator.

**4. I am aware that I am responsible for:**

Maintaining the confidentiality of any non-public information that I become aware of through this activity and avoiding any use of such information other than to carry out my responsibilities as a member of the DSMB. I understand that this prohibition includes disclosure or use of such nonpublic information for any scientific purpose, such as in my own research, as well as for any financial benefit, such as making investments based on the outcome of the study.

**Signature:** \_\_\_\_\_ **Date:** \_\_\_\_\_

**5. Certification**

This certification and other pertinent information has been reviewed and discussed with the candidate and it has been determined that:

There is no conflict of interest. Thus, the candidate may become a member of the DSMB.

There is an appearance of a conflict of interest, but the interest of the Government in the candidate's participation outweighs the appearance of a conflict as determined in the attached authorization. Thus, the candidate may become a member of the DSMB.

**Coordinating Investigator Signature:** \_\_\_\_\_ **Date:** \_\_\_\_\_

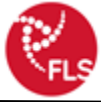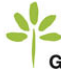

---

● **APPENDIX B: DSMB MEMBER CHARTER SIGNATURE PAGE**

**Member Information**

---

**Role:** DSMB Chair \_\_\_\_\_ Member \_\_\_\_\_

---

**Voting Rights:** Yes \_\_\_\_\_ No \_\_\_\_\_

**Name:**

**Affiliation:**

**Phone:**

**Fax:**

**E-mail address:**

**Re:** DSMB Charter      **Version Date:** \_\_\_\_\_

**I have reviewed the attached DSMB Charter and approve it as written.**

**I understand my role as a member of this DSMB.**

**Signature:** \_\_\_\_\_ **Date:** \_\_\_\_\_
